# Supplementary material for: Rhodium-catalyzed dearomative rearrangement of 2-oxypyridines with cyclopropenes: access to N-alkylated 2-pyridones
Source: Royal Society of Chemistry journal article supplement (doi:10.1039/d1qo01937f), 2022-01-01

## Supporting Information

### **Rhodium-Catalyzed Dearomative Rearrangement of 2-Oxypyridines with Cyclopropenes: Access to N-Alkylated 2-Pyridones**

Honglian Cui, Guangyang Xu, Jie Zhu and Jiangtao Sun\*

Jiangsu Key Laboratory of Advanced Catalytic Materials & Technology, School of Petrochemical  
Engineering, Changzhou University, Changzhou 213164, China

E-mail: [jtsun@cczu.edu.cn](mailto:jtsun@cczu.edu.cn)

# Table of Contents

1. General information
2. Preparation of substrates
3. General procedure for Scheme 2 and 3
4. Further exploration for Scheme 4
5. X-ray crystallographic data
6. References
7. NMR Spectra of compounds

## General information

All of the reactions were carried out in flame-dried tubes under argon atmosphere. Solvents were dried prior to use. Commercially obtained reagents were used as received. Analytical thin layer chromatography (TLC) was carried out using pre-coated (0.20 mm thickness) silica gel plates with F<sub>254</sub> indicator. For column chromatography, 200-300 mesh silica gel was used. <sup>1</sup>H NMR were recorded on Bruker 300 MHz, 400 MHz spectrometer in CDCl<sub>3</sub>. <sup>13</sup>C NMR were recorded on Bruker 75 MHz or 100 MHz spectrometer in CDCl<sub>3</sub>. <sup>19</sup>F NMR were recorded on Bruker 282 MHz spectrometer in CDCl<sub>3</sub>. Data for <sup>1</sup>H NMR spectra were reported relative to tetramethylsilane (TMS) as an internal standard (0 ppm), and were reported as follows: chemical shift (δ ppm), multiplicity, coupling constant (Hz) and integration. Multiplicities are denoted as follows: s = singlet, d = doublet, t = triplet, q = quartet, dd = doublet of doublets, td = triplet of doublets, and m = multiplet. Data for <sup>13</sup>C NMR spectra were reported relative to CDCl<sub>3</sub> as an internal standard (77.16 ppm), and were reported in terms of chemical shift (δ ppm). High resolution mass spectra (HRMS) were performed on Agilent 6540 Q-TOF or Agilent 6230A TOF mass spectrometer (ESI). Melting points were determined on a SGW X-4B melting point apparatus without correction.

## Preparation of substrates

2-O-substituted pyridines (**1**)<sup>1</sup> and cyclopropenes (**2**)<sup>2</sup> were prepared according to literature procedures. Methyl 2-((tert-butoxycarbonyl)oxy)isonicotinate (**1f**) was new compound.

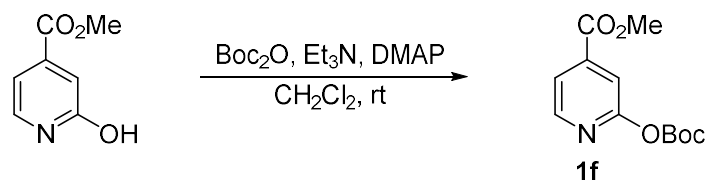

To a solution of methyl 2-hydroxyisonicotinate (1 mmol) in CH<sub>2</sub>Cl<sub>2</sub> (2.5 mL) was added Et<sub>3</sub>N (2 mmol) and DMAP (0.1 mmol) at rt, then stirred for 5 min. Boc<sub>2</sub>O (1.1 mmol) in CH<sub>2</sub>Cl<sub>2</sub> (0.5 mL) was added dropwise to the reaction solution and stirred until consumption of the starting material. The reaction was diluted with CH<sub>2</sub>Cl<sub>2</sub>, washed with brine, dried over Na<sub>2</sub>SO<sub>4</sub>, filtered and concentrated under vacuum; the residue was purified by column chromatography (silica gel, eluted with EtOAc:Petroleum ether = 1:50-1:10, note: 20% Et<sub>3</sub>N was added in the eluent.) to give **1f** as yellow solid (197.4 mg, 78%).

**R<sub>f</sub>** (Petroleum ether/ EtOAc 5:1) = 0.5.

**<sup>1</sup>H NMR** (400 MHz, CDCl<sub>3</sub>): δ (ppm) 8.54 (d, *J* = 5.1 Hz, 1H), 7.78 (dd, *J* = 5.1, 1.1 Hz, 1H), 7.67 (s, 1H), 3.97 (s, 3H), 1.58 (s, 9H).

**<sup>13</sup>C NMR** (100 MHz, CDCl<sub>3</sub>): δ (ppm) 164.6, 158.7, 150.7, 149.2, 141.3, 121.4, 115.8, 84.5, 52.9, 27.7.

**HRMS (ESI)**: calculated for C<sub>12</sub>H<sub>15</sub>NO<sub>5</sub>Na [M+Na]<sup>+</sup>: 276.0842; Found: 276.0839.

## General procedure for Scheme 2 and 3

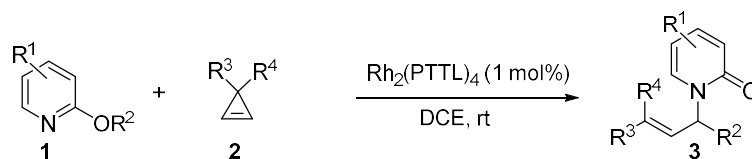

To a dry sealable Schlenk tube was added  $\text{Rh}_2(\text{PTTL})_4$  (2.5 mg, 0.002 mmol, 1 mol%) under an argon atmosphere, then a solution of **1** (0.2 mmol, 1 equiv) and **2** (0.24 mmol, 1.2 equiv) in DCE (2 mL) was added. The resulting solution was stirred at rt for 4–8 h until consumption of the starting materials monitored by TLC. The reaction solution was concentrated under vacuum; the residue was purified by column chromatography on silica gel to give **3**.

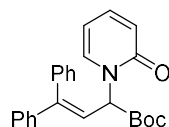

### *tert-butyl 2-(2-oxopyridin-1(2H)-yl)-4,4-diphenylbut-3-enoate (3aa)*

Prepared from tert-butyl pyridin-2-yl carbonate (39.0 mg, 0.2 mmol, 1.0 equiv) and cycloprop-2-ene-1,1-diyldibenzene (46.1 mg, 0.24 mmol, 1.2 equiv) according to the general procedure in the presence of  $\text{Rh}_2(\text{PTTL})_4$  (2.5 mg, 0.002 mmol, 1 mol%). The crude product was purified by flash chromatography on silica gel (Petroleum ether/ EtOAc = 20:1 to 5:1) to give the desired product as a white solid (74.3 mg, 96%), mp: 108–110 °C.

$R_f$  (Petroleum ether/ EtOAc 5:1) = 0.35.

$^1\text{H NMR}$  (300 MHz,  $\text{CDCl}_3$ ):  $\delta$  (ppm) 7.42–7.34 (m, 3H), 7.34–7.25 (m, 6H), 7.22 (dd,  $J = 7.1, 1.7$  Hz, 1H), 7.18–7.11 (m, 2H), 6.52 (d,  $J = 9.3$ , 1H), 6.46 (d,  $J = 9.6$  Hz, 1H), 6.13 (td,  $J = 6.8, 1.3$  Hz, 1H), 5.38 (d,  $J = 9.6$  Hz, 1H), 1.47 (s, 9H).

$^{13}\text{C NMR}$  (75 MHz,  $\text{CDCl}_3$ ):  $\delta$  (ppm) 168.3, 162.1, 149.5, 140.9, 139.6, 138.3, 136.2, 129.4, 128.8, 128.5, 128.4, 128.3, 127.7, 120.9, 120.1, 105.8, 82.7, 61.5, 28.0.

**HRMS (ESI)**: calculated for  $\text{C}_{25}\text{H}_{25}\text{NO}_3\text{Na}$   $[\text{M}+\text{Na}]^+$ : 410.1727; Found: 410.1721.

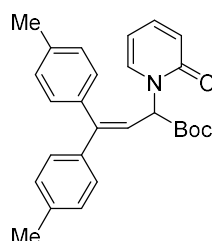

### *tert-butyl 2-(2-oxopyridin-1(2H)-yl)-4,4-di-p-tolylbut-3-enoate (3ab)*

Prepared from tert-butyl pyridin-2-yl carbonate (39.0 mg, 0.2 mmol, 1.0 equiv) and 4,4'-(cycloprop-2-ene-1,1-diy)bis(methylbenzene) (52.8 mg, 0.24 mmol, 1.2 equiv) according to the general procedure in the presence of  $\text{Rh}_2(\text{PTTL})_4$  (2.5 mg, 0.002 mmol, 1 mol%). The crude product was purified by flash chromatography on silica gel (Petroleum ether/ EtOAc = 20:1 to 5:1) to give the desired product as a white solid (70.6 mg, 85%), mp: 89–90 °C.

$R_f$  (Petroleum ether/ EtOAc 5:1) = 0.35.

**<sup>1</sup>H NMR** (300 MHz, CDCl<sub>3</sub>): δ (ppm) 7.35-7.27 (m, 2H), 7.21-7.14 (m, 4H), 7.10 (d, *J* = 8.1 Hz, 2H), 7.02 (d, *J* = 8.1 Hz, 2H), 6.53 (dd, *J* = 9.9, 1.4 Hz, 1H), 6.34 (d, *J* = 9.9 Hz, 1H), 6.15 (td, *J* = 6.7, 1.4 Hz, 1H), 5.39 (d, *J* = 9.9 Hz, 1H), 2.37 (s, 3H), 2.34 (s, 3H), 1.47 (s, 9H).

**<sup>13</sup>C NMR** (75 MHz, CDCl<sub>3</sub>): δ (ppm) 168.4, 162.1, 149.7, 139.5, 138.4, 138.3, 137.9, 136.0, 135.3, 129.3, 129.2, 129.0, 127.7, 120.8, 118.5, 105.7, 82.5, 61.5, 28.0, 21.3, 21.2.

**HRMS (ESI)**: calculated for C<sub>27</sub>H<sub>29</sub>NO<sub>3</sub>Na [M+Na]<sup>+</sup>: 438.2040; Found: 438.2042.

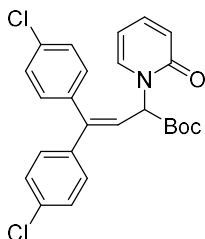

***tert-butyl 4,4-bis(4-chlorophenyl)-2-(2-oxopyridin-1(2H)-yl)but-3-enoate (3ac)***

Prepared from tert-butyl pyridin-2-yl carbonate (39.0 mg, 0.2 mmol, 1.0 equiv) and 4,4'-(cycloprop-2-ene-1,1-diyl)bis(chlorobenzene) (62.4 mg, 0.24 mmol, 1.2 equiv) according to the general procedure in the presence of Rh<sub>2</sub>(PTTL)<sub>4</sub> (2.5 mg, 0.002 mmol, 1 mol%). The crude product was purified by flash chromatography on silica gel (Petroleum ether/ EtOAc = 20:1 to 5:1) to give the desired product as a white solid (84.6 mg, 93%), mp: 181-183 °C.

**R<sub>f</sub>** (Petroleum ether/ EtOAc 5:1) = 0.35.

**<sup>1</sup>H NMR** (300 MHz, CDCl<sub>3</sub>): δ (ppm) 7.38 (d, *J* = 8.3 Hz, 2H), 7.35-7.23 (m, 3H), 7.20-7.14 (m, 3H), 7.09 (d, *J* = 8.3 Hz, 2H), 6.53 (d, *J* = 9.1 Hz, 1H), 6.48 (d, *J* = 9.5 Hz, 1H), 6.15 (t, *J* = 6.4 Hz, 1H), 5.38 (d, *J* = 9.5 Hz, 1H), 1.46 (s, 9H).

**<sup>13</sup>C NMR** (75 MHz, CDCl<sub>3</sub>): δ (ppm) 167.8, 161.9, 146.7, 139.7, 138.9, 136.2, 136.1, 134.6, 134.5, 130.7, 129.1, 128.9, 128.6, 121.4, 121.0, 106.0, 83.0, 61.2, 27.9.

**HRMS (ESI)**: calculated for C<sub>25</sub>H<sub>23</sub>Cl<sub>2</sub>NO<sub>3</sub>Na [M+Na]<sup>+</sup>: 478.0947; Found: 478.0946.

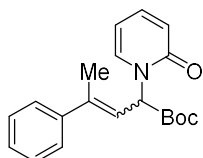

***tert-butyl 2-(2-oxopyridin-1(2H)-yl)-4-phenylpent-3-enoate (3ad)***

Prepared from tert-butyl pyridin-2-yl carbonate (39.0 mg, 0.2 mmol, 1.0 equiv) and (1-methylcycloprop-2-en-1-yl)benzene (31.2 mg, 0.24 mmol, 1.2 equiv) according to the general procedure in the presence of Rh<sub>2</sub>(PTTL)<sub>4</sub> (2.5 mg, 0.002 mmol, 1 mol%). The crude product was purified by flash chromatography on silica gel (Petroleum ether/ EtOAc = 20:1 to 5:1) to give the desired product as colorless sticky oil (55.9 mg, 86%, isomer ratio = 3:1).

**R<sub>f</sub>** (Petroleum ether/ EtOAc 5:1) = 0.3.

**<sup>1</sup>H NMR** (400 MHz, CDCl<sub>3</sub>): δ (ppm) 7.42 (dt, *J* = 3.8, 1.9 Hz, 3H), 7.39-7.27 (m, 5.32H), 7.22 (dd, *J* = 6.8, 1.7 Hz, 0.33H), 7.17-7.11 (m, 0.66H), 6.60 (d, *J* = 9.1 Hz, 1H), 6.50 (d, *J* = 9.2 Hz, 0.33H), 6.29 (d, *J* = 8.8 Hz, 1H), 6.20 (td, *J* = 6.8, 1.3 Hz, 1H), 6.14 (td, *J* = 6.8, 1.4 Hz, 0.33H), 6.00-5.94 (m, 1H), 5.86 (dd, *J* = 9.7, 1.4 Hz, 0.33H), 5.30 (d, *J* = 9.7 Hz, 0.33H), 2.16 (d, *J* = 1.4 Hz, 1H), 2.13 (d, *J* = 1.3 Hz, 3H), 1.48 (s, 9H), 1.45 (s, 3H).

<sup>13</sup>C NMR (75 MHz, CDCl<sub>3</sub>): δ (ppm) 169.0, 168.6, 162.3, 162.0, 146.7, 145.1, 141.9, 140.0, 139.5, 139.4, 135.9, 135.5, 128.6, 128.5, 128.2, 127.8, 127.3, 126.0, 120.7, 120.4, 119.6, 118.8, 106.0, 105.5, 82.8, 82.4, 60.7, 56.9, 28.0, 27.9, 26.2, 17.1.

HRMS (ESI): calculated for C<sub>20</sub>H<sub>23</sub>NO<sub>3</sub>Na [M+Na]<sup>+</sup>: 348.1570; Found: 348.1572.

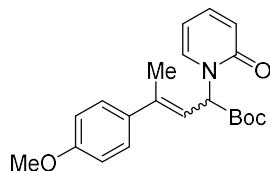

***tert-butyl 4-(4-methoxyphenyl)-2-(2-oxopyridin-1(2H)-yl)pent-3-enoate (3ae)***

Prepared from tert-butyl pyridin-2-yl carbonate (39.0 mg, 0.2 mmol, 1.0 equiv) and 1-methoxy-4-(1-methylcycloprop-2-en-1-yl)benzene (38.4 mg, 0.24 mmol, 1.2 equiv) according to the general procedure in the presence of Rh<sub>2</sub>(PTTL)<sub>4</sub> (2.5 mg, 0.002 mmol, 1 mol%). The crude product was purified by flash chromatography on silica (Petroleum ether/ EtOAc = 20:1 to 5:1) to give the desired product as colorless sticky oil (65.3 mg, 92%, isomer ratio = 1.3:1).

R<sub>f</sub> (Petroleum ether/ EtOAc 5:1) = 0.3.

<sup>1</sup>H NMR (300 MHz, CDCl<sub>3</sub>): δ (ppm) 7.47-7.23 (m, 5.52H), 7.13-7.04 (m, 1.52H), 6.92-6.82 (m, 3.52H), 6.59 (d, *J* = 8.7 Hz, 1H), 6.54-6.45 (m, 0.76H), 6.25 (d, *J* = 8.8 Hz, 1H), 6.22-6.08 (m, 1.72H), 5.90 (dd, *J* = 8.8, 1.3 Hz, 1H), 5.78 (dd, *J* = 9.8, 1.4 Hz, 0.76H), 5.39 (d, *J* = 9.8 Hz, 0.76H), 3.82 (s, 3H), 3.80 (s, 2.28H), 2.15 (d, *J* = 1.4 Hz, 2.28H), 2.10 (d, *J* = 1.3 Hz, 3H), 1.48 (s, 9H), 1.45 (s, 6.84H).

<sup>13</sup>C NMR (75 MHz, CDCl<sub>3</sub>): δ (ppm) 169.2, 168.7, 162.3, 162.1, 159.7, 159.2, 146.5, 144.4, 139.5, 139.4, 135.8, 135.5, 134.2, 132.1, 128.5, 127.2, 120.7, 120.4, 118.1, 117.8, 114.0, 113.8, 105.9, 105.5, 82.7, 82.3, 60.6, 57.1, 55.4, 55.3, 28.0, 27.9, 26.3, 17.0.

HRMS (ESI): calculated for C<sub>21</sub>H<sub>25</sub>NO<sub>4</sub>Na [M+Na]<sup>+</sup>: 378.1676; Found: 378.1680.

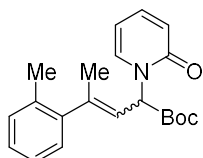

***tert-butyl 2-(2-oxopyridin-1(2H)-yl)-4-(o-tolyl)pent-3-enoate (3af)***

Prepared from tert-butyl pyridin-2-yl carbonate (39.0 mg, 0.2 mmol, 1.0 equiv) and 1-methyl-2-(1-methylcycloprop-2-en-1-yl)benzene (34.6 mg, 0.24 mmol, 1.2 equiv) according to the general procedure in the presence of Rh<sub>2</sub>(PTTL)<sub>4</sub> (2.5 mg, 0.002 mmol, 1 mol%). The crude product was purified by flash chromatography on silica gel (Petroleum ether/ EtOAc = 20:1 to 5:1) to give the desired product as a white solid (62.4 mg, 92%, isomer ratio = 1.3:1), mp: 123-124 °C.

R<sub>f</sub> (Petroleum ether/ EtOAc 5:1) = 0.3.

<sup>1</sup>H NMR (300 MHz, CDCl<sub>3</sub>): δ (ppm) 7.31-7.03 (m, 9.10H), 6.91 (d, *J* = 5.8 Hz, 0.82H), 6.72 (d, *J* = 7.1 Hz, 1H), 6.46 (d, *J* = 9.1 Hz, 1.82H), 6.18-5.92 (m, 3.64H), 4.92 (d, *J* = 9.1 Hz, 0.82H), 4.77 (d, *J* = 9.4 Hz, 1H), 2.31 (s, 3H), 2.06 (s, 5.46H), 1.95 (s, 2.46H), 1.44 (s, 16.40H).

<sup>13</sup>C NMR (75 MHz, CDCl<sub>3</sub>): δ (ppm) 168.4, 162.0, 161.9, 146.9, 146.3, 139.7, 139.6, 139.4, 136.5, 136.2, 134.7, 130.5, 130.4, 127.9, 127.7, 127.1, 126.2, 126.0, 120.7, 120.0, 119.8, 105.4, 105.3, 82.3, 61.8, 61.5, 27.9, 25.4, 19.0, 18.8.

**HRMS (ESI):** calculated for  $C_{21}H_{25}NO_3Na$   $[M+Na]^+$ : 362.1727; Found: 362.1734.

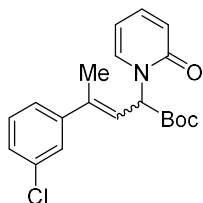

***tert-butyl 4-(3-chlorophenyl)-2-(2-oxopyridin-1(2H)-yl)pent-3-enoate (3ag)***

Prepared from tert-butyl pyridin-2-yl carbonate (39.0 mg, 0.2 mmol, 1.0 equiv) and 1-chloro-3-(1-methylcycloprop-2-en-1-yl)benzene (39.4 mg, 0.24 mmol, 1.2 equiv) according to the general procedure in the presence of  $Rh_2(PTTL)_4$  (2.5 mg, 0.002 mmol, 1 mol%). The crude product was purified by flash chromatography on silica gel (Petroleum ether/ EtOAc = 20:1 to 5:1) to give the desired product as a white solid (63.2 mg, 88%, isomer ratio = 1:1), mp:70-72 °C.

$R_f$  (Petroleum ether/ EtOAc 5:1) = 0.3.

$^1H$  NMR (400 MHz,  $CDCl_3$ ):  $\delta$  (ppm) 7.41-7.25 (m, 9H), 7.20 (dd,  $J$  = 6.9, 1.7 Hz, 1H), 7.17-7.13 (m, 1H), 7.08-7.00 (m, 1H), 6.60 (d,  $J$  = 8.9 Hz, 1H), 6.50 (d,  $J$  = 8.7 Hz, 1H), 6.29 (d,  $J$  = 8.7 Hz, 1H), 6.21 (td,  $J$  = 6.9, 1.4 Hz, 1H), 6.15 (td,  $J$  = 6.9, 1.4 Hz, 1H), 6.00 (dd,  $J$  = 8.7, 1.4 Hz, 1H), 5.89 (dd,  $J$  = 9.6, 1.4 Hz, 1H), 5.31 (d,  $J$  = 9.6 Hz, 1H), 2.13 (d,  $J$  = 1.4 Hz, 3H), 2.12 (d,  $J$  = 1.4 Hz, 3H), 1.48 (s, 9H), 1.46 (s, 9H).

$^{13}C$  NMR (75 MHz,  $CDCl_3$ ):  $\delta$  (ppm) 168.7, 168.3, 162.2, 161.9, 144.9, 143.8, 143.5, 141.8, 139.5, 139.4, 135.9, 135.5, 134.42, 134.4, 130.0, 129.7, 128.1, 127.9, 127.6, 126.2, 125.6, 124.2, 121.0, 120.8, 120.5, 120.0, 106.1, 105.7, 83.0, 82.7, 60.3, 56.7, 28.0, 27.9, 26.0, 17.1.

**HRMS (ESI):** calculated for  $C_{20}H_{22}ClNO_3Na$   $[M+Na]^+$ : 382.1180; Found: 382.1186.

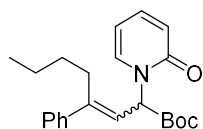

***tert-butyl 2-(2-oxopyridin-1(2H)-yl)-4-phenyloct-3-enoate (3ah)***

Prepared from tert-butyl pyridin-2-yl carbonate (39.0 mg, 0.2 mmol, 1.0 equiv) and (1-butylcycloprop-2-en-1-yl)benzene (41.3 mg, 0.24 mmol, 1.2 equiv) according to the general procedure in the presence of  $Rh_2(PTTL)_4$  (2.5 mg, 0.002 mmol, 1 mol%). The crude product was purified by flash chromatography on silica (Petroleum ether/ EtOAc = 20:1 to 5:1) to give the desired product as colorless sticky oil (54.3 mg, 74%, isomer ratio = 2:1).

$R_f$  (Petroleum ether/ EtOAc 5:1) = 0.3.

$^1H$  NMR (300 MHz,  $CDCl_3$ ):  $\delta$  (ppm) 7.45-7.40 (m, 1H), 7.39-7.24 (m, 8.0H), 7.23-7.16 (m, 0.5H), 7.14-7.08 (m, 1H), 6.59 (d,  $J$  = 9.2 Hz, 1H), 6.49 (d,  $J$  = 9.2 Hz, 0.5H), 6.25 (d,  $J$  = 9.4 Hz, 1H), 6.22-6.16 (m, 1H), 6.15-6.09 (m, 0.5H), 5.87-5.77 (m, 1.5H), 5.25 (d,  $J$  = 9.7 Hz, 0.5H), 2.66-2.49 (m, 2H), 2.48-2.39 (m, 1H), 1.49 (s, 9H), 1.46 (s, 4.5H), 1.37-1.15 (m, 6H), 0.87 (t,  $J$  = 7.0 Hz, 1.5H), 0.81 (t,  $J$  = 6.9 Hz, 3H).

$^{13}C$  NMR (75 MHz,  $CDCl_3$ ):  $\delta$  (ppm) 169.1, 168.6, 162.3, 162.0, 151.0, 150.7, 141.4, 139.5, 139.4, 139.3, 135.9, 135.5, 128.5, 128.49, 128.1, 127.7, 127.6, 126.7, 120.7, 120.4, 119.5, 118.4, 105.8, 105.5, 82.7, 82.3, 60.7, 56.8, 39.3, 30.7, 30.5, 29.7, 28.0, 27.9, 22.5, 22.1, 13.9, 13.8.

**HRMS (ESI):** calculated for  $C_{23}H_{29}NO_3Na$   $[M+Na]^+$ : 390.2040; Found: 390.2044.

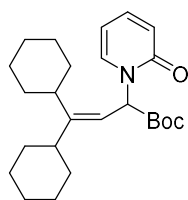

***tert-butyl 4,4-dicyclohexyl-2-(2-oxopyridin-1(2H)-yl)but-3-enoate (3ai)***

Prepared from tert-butyl pyridin-2-yl carbonate (39.0 mg, 0.2 mmol, 1.0 equiv) and cycloprop-2-ene-1,1-diyl dicyclohexane (48.9 mg, 0.24 mmol, 1.2 equiv) according to the general procedure in the presence of Rh<sub>2</sub>(PTTL)<sub>4</sub> (2.5 mg, 0.002 mmol, 1 mol%) at 45 °C. The crude product was purified by flash chromatography on silica gel (Petroleum ether/ EtOAc = 20:1 to 5:1) to give the desired product as a white solid (67.0 mg, 84%), mp: 113-114 °C.

R<sub>f</sub> (Petroleum ether/ EtOAc 5:1) = 0.3.

<sup>1</sup>H NMR (300 MHz, CDCl<sub>3</sub>): δ (ppm) 7.41-7.29 (m, 2H), 6.56 (d, *J* = 9.3 Hz, 1H), 6.17 (td, *J* = 6.8, 1.2 Hz, 1H), 6.01 (d, *J* = 9.6 Hz, 1H), 5.33 (d, *J* = 9.6 Hz, 1H), 2.52-2.39 (m, 1H), 2.08-1.97 (m, 1H), 1.82-1.53 (m, 9H), 1.45 (s, 9H), 1.38-1.10 (m, 11H).

<sup>13</sup>C NMR (75 MHz, CDCl<sub>3</sub>): δ (ppm) 169.7, 162.5, 161.5, 139.3, 135.1, 120.2, 114.4, 105.5, 82.1, 56.4, 41.6, 40.3, 34.9, 34.8, 30.4, 30.1, 27.9, 26.9, 26.1, 26.06, 26.0, 25.9.

HRMS (ESI): calculated for C<sub>25</sub>H<sub>37</sub>NO<sub>3</sub>Na [M+Na]<sup>+</sup>: 422.2666; Found: 422.2669.

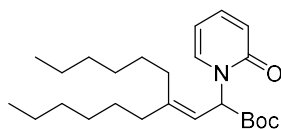

***tert-butyl 4-hexyl-2-(2-oxopyridin-1(2H)-yl)dec-3-enoate (3aj)***

Prepared from tert-butyl pyridin-2-yl carbonate (39.0 mg, 0.2 mmol, 1.0 equiv) and 3,3-dihexylcycloprop-1-ene (49.9 mg, 0.24 mmol, 1.2 equiv) according to the general procedure in the presence of Rh<sub>2</sub>(PTTL)<sub>4</sub> (2.5 mg, 0.002 mmol, 1 mol%). The crude product was purified by flash chromatography on silica gel (Petroleum ether/ EtOAc = 20:1 to 5:1) to give the desired product as colorless sticky oil (74.2 mg, 92%).

R<sub>f</sub> (Petroleum ether/ EtOAc 5:1) = 0.3.

<sup>1</sup>H NMR (400 MHz, CDCl<sub>3</sub>): δ (ppm) 7.38 (dd, *J* = 6.8, 1.8 Hz, 1H), 7.34-7.27 (m, 1H), 6.54 (d, *J* = 8.7 Hz, 1H), 6.16 (td, *J* = 6.8, 1.2 Hz, 1H), 5.99 (d, *J* = 9.6 Hz, 1H), 5.36 (d, *J* = 9.6 Hz, 1H), 2.14-2.03 (m, 4H), 1.52-1.35 (m, 12H), 1.34-1.14 (m, 13H), 0.90-0.83 (m, 6H).

<sup>13</sup>C NMR (75 MHz, CDCl<sub>3</sub>): δ (ppm) 169.6, 162.3, 151.9, 139.3, 135.4, 120.3, 116.2, 105.5, 82.2, 56.6, 36.6, 31.7, 31.67, 30.9, 29.2, 28.9, 28.1, 27.9, 27.8, 22.6, 22.5, 14.1, 14.0.

HRMS (ESI): calculated for C<sub>25</sub>H<sub>41</sub>NO<sub>3</sub>Na [M+Na]<sup>+</sup>: 426.2979; Found: 426.2981.

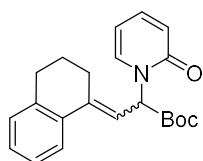

***tert-butyl 3-(3,4-dihydronaphthalen-1(2H)-ylidene)-2-(2-oxopyridin-1(2H)-yl)propanoate (3ak)***



Prepared from tert-butyl pyridin-2-yl carbonate (39.0 mg, 0.2 mmol, 1.0 equiv) and 3',4'-dihydro-2'H-spiro[cyclopropane-1,1'-naphthalen]-2-ene (37.4 mg, 0.24 mmol, 1.2 equiv) according to the general procedure in the presence of Rh<sub>2</sub>(PTTL)<sub>4</sub> (2.5 mg, 0.002 mmol, 1 mol%). The crude product was purified by flash chromatography on silica gel (Petroleum ether/ EtOAc = 20:1 to 5:1) to give the desired product as colorless sticky oil (62.5 mg, 89%, isomer ratio = 1.25:1).

R<sub>f</sub> (Petroleum ether/ EtOAc 5:1) = 0.3.

<sup>1</sup>H NMR (400 MHz, CDCl<sub>3</sub>): δ (ppm) 7.67-7.60 (m, 0.82H), 7.50-7.41 (m, 1.82H), 7.38-7.29 (m, 1.82H), 7.26-7.09 (m, 6.46H), 6.58 (d, *J* = 9.2 Hz, 1.82H), 6.28 (d, *J* = 8.7 Hz, 0.82H), 6.23-6.11 (m, 2.64H), 5.93 (d, *J* = 10.0 Hz, 1H), 5.62 (d, *J* = 10.0 Hz, 1H), 2.90-2.74 (m, 3.64H), 2.71-2.49 (m, 2.82H), 2.44-2.34 (m, 0.82H), 2.03-1.91 (m, 2H), 1.88-1.73 (m, 1.64H), 1.48 (s, 7.38H), 1.45 (s, 9H).

<sup>13</sup>C NMR (75 MHz, CDCl<sub>3</sub>): δ (ppm) 169.3, 169.0, 162.4, 162.3, 146.8, 144.1, 139.6, 139.1, 138.6, 135.5, 135.3, 134.3, 133.9, 129.2, 128.8, 128.6, 128.4, 127.3, 126.3, 126.0, 124.3, 120.7, 120.4, 115.4, 115.0, 105.9, 105.7, 82.8, 82.4, 59.9, 56.6, 34.7, 30.2, 29.3, 28.0, 27.9, 27.2, 23.9, 22.7.

HRMS (ESI): calculated for C<sub>22</sub>H<sub>25</sub>NO<sub>3</sub>Na [M+Na]<sup>+</sup>: 374.1727; Found: 374.1731.

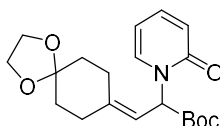

***tert-butyl 2-(2-oxopyridin-1(2H)-yl)-3-(1,4-dioxaspiro[4.5]decan-8-ylidene)propanoate (3al)***

Prepared from tert-butyl pyridin-2-yl carbonate (39.0 mg, 0.2 mmol, 1.0 equiv) and 7,10-dioxadispiro[2.2.4<sup>6</sup>.2<sup>3</sup>]dodec-1-ene (39.8 mg, 0.24 mmol, 1.2 equiv) according to the general procedure in the presence of Rh<sub>2</sub>(PTTL)<sub>4</sub> (2.5 mg, 0.002 mmol, 1 mol%) at 45 °C. The crude product was purified by flash chromatography on silica gel (Petroleum ether/ EtOAc = 20:1 to 5:1) to give the desired product as a white solid (69.3 mg, 96%), mp: 128-129 °C.

R<sub>f</sub> (Petroleum ether/ EtOAc 5:1) = 0.3.

<sup>1</sup>H NMR (300 MHz, CDCl<sub>3</sub>): δ (ppm) 7.39 (dd, *J* = 6.9, 1.5 Hz, 1H), 7.37-7.28 (m, 1H), 6.57 (d, *J* = 8.7 Hz, 1H), 6.20 (td, *J* = 6.9, 1.5 Hz, 1H), 6.13 (d, *J* = 8.7 Hz, 1H), 5.46 (d, *J* = 8.7 Hz, 1H), 4.00-3.92 (m, 4H), 2.47-2.22 (m, 4H), 1.77-1.53 (m, 4H), 1.45 (s, 9H).

<sup>13</sup>C NMR (75 MHz, CDCl<sub>3</sub>): δ (ppm) 169.2, 162.2, 148.1, 139.5, 135.4, 120.3, 115.2, 108.2, 105.8, 82.6, 64.5, 64.4, 56.0, 36.0, 34.9, 33.5, 27.9, 26.3.

HRMS (ESI): calculated for C<sub>20</sub>H<sub>27</sub>NO<sub>3</sub>Na [M+Na]<sup>+</sup>: 384.1781; Found: 384.1785.

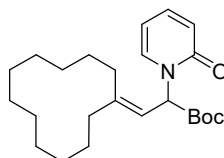

***tert-butyl 3-cyclododecylidene-2-(2-oxopyridin-1(2H)-yl)propanoate (3am)***

Prepared from tert-butyl pyridin-2-yl carbonate (39.0 mg, 0.2 mmol, 1.0 equiv) and spiro[2.11]tetradec-1-ene (46.0 mg, 0.24 mmol, 1.2 equiv) according to the general procedure in the presence of Rh<sub>2</sub>(PTTL)<sub>4</sub> (2.5 mg, 0.002 mmol, 1 mol%) at 45 °C. The crude product was

purified by flash chromatography on silica gel (Petroleum ether/ EtOAc = 20:1 to 5:1) to give the desired product as a white solid (49.6 mg, 64%), mp: 85-87 °C.

$R_f$  (Petroleum ether/ EtOAc 5:1) = 0.35.

$^1\text{H NMR}$  (300 MHz,  $\text{CDCl}_3$ ):  $\delta$  (ppm) 7.38 (dd,  $J = 7.0, 1.7$  Hz, 1H), 7.35-7.26 (m, 1H), 6.56 (d,  $J = 9.1$  Hz, 1H), 6.17 (td,  $J = 7.0, 1.2$  Hz, 1H), 6.05 (d,  $J = 9.3$  Hz, 1H), 5.49 (d,  $J = 9.3$  Hz, 1H), 2.30-2.11 (m, 3H), 2.10-1.99 (m, 1H), 1.76-1.25 (m, 27H).

$^{13}\text{C NMR}$  (75 MHz,  $\text{CDCl}_3$ ):  $\delta$  (ppm) 169.8, 162.3, 150.2, 139.3, 135.5, 120.4, 116.8, 105.5, 82.3, 56.5, 31.2, 30.0, 27.9, 25.2, 25.0, 24.0, 23.7, 23.6, 23.56, 23.1, 23.08, 22.2.

**HRMS (ESI)**: calculated for  $\text{C}_{24}\text{H}_{37}\text{NO}_3\text{Na}$   $[\text{M}+\text{Na}]^+$ : 410.2666; Found: 410.2665.

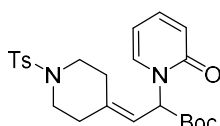

***tert-butyl 2-(2-oxopyridin-1(2H)-yl)-3-(1-tosylpiperidin-4-ylidene)propanoate (3an)***

Prepared from tert-butyl pyridin-2-yl carbonate (39.0 mg, 0.2 mmol, 1.0 equiv) and 6-tosyl-6-azaspiro[2.5]oct-1-ene (63.1 mg, 0.24 mmol, 1.2 equiv) according to the general procedure in the presence of  $\text{Rh}_2(\text{PTTL})_4$  (2.5 mg, 0.002 mmol, 1 mol%) at 80 °C. The crude product was purified by flash chromatography on silica gel (Petroleum ether/ EtOAc = 10:1 to 1:1) to give the desired product as a white solid (82.5 mg, 90%), mp: 186-188 °C.

$R_f$  (Petroleum ether/ EtOAc 1:1) = 0.3.

$^1\text{H NMR}$  (300 MHz,  $\text{CDCl}_3$ ):  $\delta$  (ppm) 7.62 (d,  $J = 8.4$  Hz, 2H), 7.37-7.23 (m, 4H), 6.62-6.45 (m, 1H), 6.27-6.06 (m, 2H), 5.48 (d,  $J = 8.9$  Hz, 1H), 3.19-2.93 (m, 4H), 2.53-2.30 (m, 7H), 1.38 (s, 9H).

$^{13}\text{C NMR}$  (75 MHz,  $\text{CDCl}_3$ ):  $\delta$  (ppm) 168.5, 161.9, 143.7, 143.5, 139.5, 135.4, 133.2, 129.7, 127.6, 120.4, 117.5, 106.0, 82.9, 55.2, 47.4, 46.7, 35.1, 28.6, 27.8, 21.5.

**HRMS (ESI)**: calculated for  $\text{C}_{24}\text{H}_{30}\text{N}_2\text{O}_5\text{SNa}$   $[\text{M}+\text{Na}]^+$ : 481.1768; Found: 481.1771.

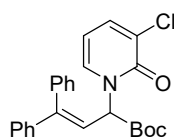

***tert-butyl 2-(3-chloro-2-oxopyridin-1(2H)-yl)-4,4-diphenylbut-3-enoate (3ba)***

Prepared from tert-butyl (3-chloropyridin-2-yl) carbonate (45.8 mg, 0.2 mmol, 1.0 equiv) and cycloprop-2-ene-1,1-diyldibenzene (46.1 mg, 0.24 mmol, 1.2 equiv) according to the general procedure in the presence of  $\text{Rh}_2(\text{PTTL})_4$  (2.5 mg, 0.002 mmol, 1 mol%). The crude product was purified by flash chromatography on silica gel (Petroleum ether/ EtOAc = 20:1 to 5:1) to give the desired product as a white solid (72.4 mg, 86%), mp: 122-124 °C.

$R_f$  (Petroleum ether/ EtOAc 5:1) = 0.25.

$^1\text{H NMR}$  (400 MHz,  $\text{CDCl}_3$ ):  $\delta$  (ppm) 7.49 (dd,  $J = 7.1, 1.6$  Hz, 1H), 7.43-7.34 (m, 3H), 7.33-7.25 (m, 5H), 7.19-7.10 (m, 3H), 6.46 (d,  $J = 9.4$  Hz, 1H), 6.10 (t,  $J = 7.1$  Hz, 1H), 5.42 (d,  $J = 9.4$  Hz, 1H), 1.47 (s, 9H).

$^{13}\text{C NMR}$  (75 MHz,  $\text{CDCl}_3$ ):  $\delta$  (ppm) 167.8, 158.5, 149.8, 140.8, 138.2, 137.7, 135.0, 129.3, 128.9, 128.6, 128.5, 128.4, 127.8, 126.4, 119.7, 105.0, 83.2, 62.5, 28.1.

**HRMS (ESI):** calculated for C<sub>25</sub>H<sub>24</sub>ClNO<sub>3</sub>Na [M+Na]<sup>+</sup>: 444.1337; Found: 444.1334.

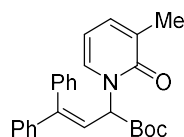

***tert-butyl 2-(3-methyl-2-oxopyridin-1(2H)-yl)-4,4-diphenylbut-3-enoate (3ca)***

Prepared from tert-butyl (3-methylpyridin-2-yl) carbonate (41.8 mg, 0.2 mmol, 1.0 equiv) and cycloprop-2-ene-1,1-diyldibenzene (46.1 mg, 0.24 mmol, 1.2 equiv) according to the general procedure in the presence of Rh<sub>2</sub>(PTTL)<sub>4</sub> (2.5 mg, 0.002 mmol, 1 mol%). The crude product was purified by flash chromatography on silica gel (Petroleum ether/ EtOAc = 20:1 to 5:1) to give the desired product as a white solid (69.0 mg, 86%), mp: 100-102 °C.

**R<sub>f</sub>** (Petroleum ether/ EtOAc 5:1) = 0.2.

**<sup>1</sup>H NMR** (400 MHz, CDCl<sub>3</sub>): δ (ppm) 7.40-7.33 (m, 3H), 7.32-7.25 (m, 5H), 7.18-7.13 (m, 3H), 7.07 (d, *J* = 6.8 Hz, 1H), 6.50 (d, *J* = 9.6 Hz, 1H), 6.05 (t, *J* = 6.8 Hz, 1H), 5.33 (d, *J* = 9.6 Hz, 1H), 2.10 (s, 3H), 1.47 (s, 9H).

**<sup>13</sup>C NMR** (75 MHz, CDCl<sub>3</sub>): δ (ppm) 168.4, 162.3, 148.8, 141.0, 138.3, 136.7, 133.6, 129.8, 129.4, 128.6, 128.3, 128.1, 127.7, 120.6, 105.4, 82.4, 61.9, 28.0, 17.2.

**HRMS (ESI):** calculated for C<sub>26</sub>H<sub>27</sub>NO<sub>3</sub>Na [M+Na]<sup>+</sup>: 424.1883; Found: 424.1881.

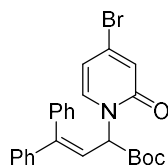

***tert-butyl 2-(4-bromo-2-oxopyridin-1(2H)-yl)-4,4-diphenylbut-3-enoate (3da)***

Prepared from tert-butyl (4-bromopyridin-2-yl) carbonate (54.6 mg, 0.2 mmol, 1.0 equiv) and cycloprop-2-ene-1,1-diyldibenzene (46.1 mg, 0.24 mmol, 1.2 equiv) according to the general procedure in the presence of Rh<sub>2</sub>(PTTL)<sub>4</sub> (2.5 mg, 0.002 mmol, 1 mol%). The crude product was purified by flash chromatography on silica gel (Petroleum ether/ EtOAc = 20:1 to 5:1) to give the desired product as colorless sticky oil (78.2 mg, 84%).

**R<sub>f</sub>** (Petroleum ether/ EtOAc 5:1) = 0.25.

**<sup>1</sup>H NMR** (400 MHz, CDCl<sub>3</sub>): δ (ppm) 7.41-7.37 (m, 3H), 7.33-7.24 (m, 5H), 7.16-7.05 (m, 3H), 6.75 (d, *J* = 2.2 Hz, 1H), 6.40 (d, *J* = 9.5 Hz, 1H), 6.29 (dd, *J* = 7.4, 2.2 Hz, 1H), 5.37 (d, *J* = 9.5 Hz, 1H), 1.47 (s, 9H).

**<sup>13</sup>C NMR** (75 MHz, CDCl<sub>3</sub>): δ (ppm) 167.9, 160.7, 150.1, 140.6, 138.0, 136.1, 135.8, 129.2, 128.8, 128.6, 128.4, 128.3, 127.7, 122.8, 119.3, 110.0, 83.0, 61.1, 28.0.

**HRMS (ESI):** calculated for C<sub>25</sub>H<sub>24</sub><sup>79</sup>BrNO<sub>3</sub>Na [M+Na]<sup>+</sup>: 488.0832; Found: 488.0826. calculated for C<sub>25</sub>H<sub>24</sub><sup>81</sup>BrNO<sub>3</sub>Na [M+Na]<sup>+</sup>: 490.0811; Found: 490.0809.

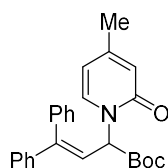

***tert-butyl 2-(4-methyl-2-oxopyridin-1(2H)-yl)-4,4-diphenylbut-3-enoate (3ea)***

Prepared from tert-butyl (4-methylpyridin-2-yl) carbonate (41.8 mg, 0.2 mmol, 1.0 equiv) and cycloprop-2-ene-1,1-diyldibenzene (46.1 mg, 0.24 mmol, 1.2 equiv) according to the general procedure in the presence of Rh<sub>2</sub>(PTTL)<sub>4</sub> (2.5 mg, 0.002 mmol, 1 mol%). The crude product was purified by flash chromatography on silica gel (Petroleum ether/ EtOAc = 20:1 to 5:1) to give the desired product as colorless sticky oil (68.2 mg, 85%).

R<sub>f</sub> (Petroleum ether/ EtOAc 5:1) = 0.2.

<sup>1</sup>H NMR (400 MHz, CDCl<sub>3</sub>): δ (ppm) 7.40-7.35 (m, 3H), 7.31-7.26 (m, 5H), 7.17-7.10 (m, 3H), 6.42 (d, *J* = 9.6 Hz, 1H), 6.32 (s, 1H), 5.99 (dd, *J* = 7.2, 1.6 Hz, 1H), 5.36 (d, *J* = 9.6 Hz, 1H), 2.16 (s, 3H), 1.47 (s, 9H).

<sup>13</sup>C NMR (75 MHz, CDCl<sub>3</sub>): δ (ppm) 168.4, 162.0, 151.2, 149.3, 140.9, 138.2, 134.9, 129.4, 128.6, 128.4, 128.3, 128.2, 127.7, 120.2, 119.2, 108.3, 82.5, 61.0, 28.0, 21.3.

HRMS (ESI): calculated for C<sub>26</sub>H<sub>27</sub>NO<sub>3</sub>Na [M+Na]<sup>+</sup>: 424.1883; Found: 424.1887.

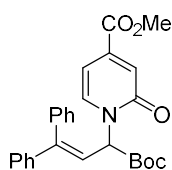

***methyl 1-(1-(tert-butoxy)-1-oxo-4,4-diphenylbut-3-en-2-yl)-2-oxo-1,2-dihydropyridine-4-carboxylate (3fa)***

Prepared from methyl 2-((tert-butoxycarbonyl)oxy)isonicotinate (50.6 mg, 0.2 mmol, 1.0 equiv) and cycloprop-2-ene-1,1-diyldibenzene (46.1 mg, 0.24 mmol, 1.2 equiv) according to the general procedure in the presence of Rh<sub>2</sub>(PTTL)<sub>4</sub> (2.5 mg, 0.002 mmol, 1 mol%). The crude product was purified by flash chromatography on silica gel (Petroleum ether/ EtOAc = 20:1 to 5:1) to give the desired product as colorless sticky oil (63.2 mg, 71%).

R<sub>f</sub> (Petroleum ether/ EtOAc 3:1) = 0.3.

<sup>1</sup>H NMR (400 MHz, CDCl<sub>3</sub>): δ (ppm) 7.41-7.35 (m, 3H), 7.32-7.26 (m, 6H), 7.17-7.09 (m, 3H), 6.63 (dd, *J* = 7.2, 1.6 Hz, 1H), 6.47 (d, *J* = 9.5 Hz, 1H), 5.40 (d, *J* = 9.5 Hz, 1H), 3.89 (s, 3H), 1.47 (s, 9H).

<sup>13</sup>C NMR (75 MHz, CDCl<sub>3</sub>): δ (ppm) 167.8, 165.1, 161.7, 150.0, 140.6, 140.5, 138.1, 136.6, 129.2, 128.8, 128.6, 128.4, 128.3, 127.7, 122.6, 119.4, 104.1, 82.9, 61.6, 52.9, 27.9.

HRMS (ESI): calculated for C<sub>27</sub>H<sub>27</sub>NO<sub>5</sub>Na [M+Na]<sup>+</sup>: 468.1781; Found: 468.1781.

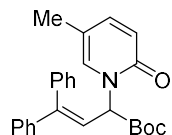

***tert-butyl 2-(5-methyl-2-oxopyridin-1(2H)-yl)-4,4-diphenylbut-3-enoate (3ga)***

Prepared from tert-butyl (5-methylpyridin-2-yl) carbonate (41.8 mg, 0.2 mmol, 1.0 equiv) and cycloprop-2-ene-1,1-diyldibenzene (46.1 mg, 0.24 mmol, 1.2 equiv) according to the general procedure in the presence of Rh<sub>2</sub>(PTTL)<sub>4</sub> (2.5 mg, 0.002 mmol, 1 mol%). The crude product was purified by flash chromatography on silica gel (Petroleum ether/ EtOAc = 20:1 to 5:1) to give the desired product as a white solid (71.4 mg, 89%), mp: 149-150 °C.

R<sub>f</sub> (Petroleum ether/ EtOAc 5:1) = 0.2.

**<sup>1</sup>H NMR** (400 MHz, CDCl<sub>3</sub>): δ (ppm) 7.42-7.34 (m, 3H), 7.31-7.25 (m, 5H), 7.19-7.11 (m, 3H), 6.93 (s, 1H), 6.47 (d, *J* = 9.6 Hz, 2H), 5.36 (d, *J* = 9.6 Hz, 1H), 2.04 (s, 3H), 1.47 (s, 9H).

**<sup>13</sup>C NMR** (75 MHz, CDCl<sub>3</sub>): δ (ppm) 168.4, 161.3, 149.1, 142.2, 140.9, 138.3, 133.6, 129.4, 128.7, 128.4, 128.3, 128.1, 127.7, 120.4, 120.37, 114.6, 82.6, 61.4, 28.0, 17.3.

**HRMS (ESI)**: calculated for C<sub>26</sub>H<sub>27</sub>NO<sub>3</sub>Na [M+Na]<sup>+</sup>: 424.1883; Found: 424.424.1885.

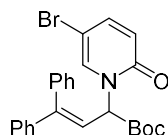

***tert-butyl 2-(5-bromo-2-oxopyridin-1(2H)-yl)-4,4-diphenylbut-3-enoate (3ha)***

Prepared from tert-butyl (5-bromopyridin-2-yl) carbonate (54.6 mg, 0.2 mmol, 1.0 equiv) and cycloprop-2-ene-1,1-diyldibenzene (46.1 mg, 0.24 mmol, 1.2 equiv) according to the general procedure in the presence of Rh<sub>2</sub>(PTTL)<sub>4</sub> (2.5 mg, 0.002 mmol, 1 mol%). The crude product was purified by flash chromatography on silica gel (Petroleum ether/ EtOAc = 20:1 to 5:1) to give the desired product as a white solid (79.1 mg, 85%). mp: 162-165 °C.

**R<sub>f</sub>** (Petroleum ether/ EtOAc 5:1) = 0.25.

**<sup>1</sup>H NMR** (400 MHz, CDCl<sub>3</sub>): δ (ppm) 7.42-7.38 (m, 3H), 7.33-7.27 (m, 7H), 7.18-7.08 (m, 2H), 6.48-7.37 (m, 2H), 5.36 (d, *J* = 9.2 Hz, 1H), 1.47 (s, 9H).

**<sup>13</sup>C NMR** (100 MHz, CDCl<sub>3</sub>): δ (ppm) 167.8, 160.5, 150.3, 142.7, 140.7, 138.1, 136.3, 129.3, 128.9, 128.7, 128.5, 128.4, 127.8, 122.0, 119.4, 97.8, 83.1, 61.5, 28.0.

**HRMS (ESI)**: calculated for C<sub>25</sub>H<sub>24</sub><sup>79</sup>BrNO<sub>3</sub>Na [M+Na]<sup>+</sup>: 488.0832; Found: 488.0826. calculated for C<sub>25</sub>H<sub>24</sub><sup>81</sup>BrNO<sub>3</sub>Na [M+Na]<sup>+</sup>: 490.0811; Found: 490.0809.

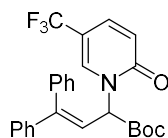

***tert-butyl 2-(2-oxo-5-(trifluoromethyl)pyridin-1(2H)-yl)-4,4-diphenylbut-3-enoate (3ia)***

Prepared from tert-butyl (5-(trifluoromethyl)pyridin-2-yl) carbonate (52.6 mg, 0.2 mmol, 1.0 equiv) and cycloprop-2-ene-1,1-diyldibenzene (46.1 mg, 0.24 mmol, 1.2 equiv) according to the general procedure in the presence of Rh<sub>2</sub>(PTTL)<sub>4</sub> (2.5 mg, 0.002 mmol, 1 mol%). The crude product was purified by flash chromatography on silica gel (Petroleum ether/ EtOAc = 20:1 to 5:1) to give the desired product as a white solid (45.5 mg, 50%), mp: 156-157 °C.

**R<sub>f</sub>** (Petroleum ether/ EtOAc 5:1) = 0.2.

**<sup>1</sup>H NMR** (400 MHz, CDCl<sub>3</sub>): δ (ppm) 7.47 (s, 1H), 7.43-7.37 (m, 4H), 7.34-7.26 (m, 5H), 7.14-7.09 (m, 2H), 6.55 (d, *J* = 9.6 Hz, 1H), 6.48 (d, *J* = 9.1 Hz, 1H), 5.40 (d, *J* = 9.1 Hz, 1H), 1.47 (s, 9H).

**<sup>13</sup>C NMR** (100 MHz, CDCl<sub>3</sub>): δ (ppm) 167.51, 161.20, 150.34, 140.40, 137.99, 136.14 (q, *J*<sub>C-F</sub> = 5.2 Hz), 135.14 (q, *J*<sub>C-F</sub> = 2.3 Hz), 129.09, 128.89, 128.71, 128.45, 128.41, 127.64, 123.37 (q, *J*<sub>C-F</sub> = 264.9 Hz), 121.25, 119.04, 109.32 (q, *J*<sub>C-F</sub> = 34.9 Hz), 83.32, 61.77, 27.92.

**<sup>19</sup>F NMR** (282 MHz, CDCl<sub>3</sub>): δ (ppm) -62.3.

**HRMS (ESI)**: calculated for C<sub>26</sub>H<sub>24</sub>F<sub>3</sub>NO<sub>3</sub>Na [M+Na]<sup>+</sup>: 478.1600; Found: 478.1603.

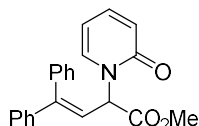

***methyl 2-(2-oxopyridin-1(2H)-yl)-4,4-diphenylbut-3-enoate (3ja)***

Prepared from methyl pyridin-2-yl carbonate (30.6 mg, 0.2 mmol, 1.0 equiv) and cycloprop-2-ene-1,1-diyldibenzene (46.1 mg, 0.24 mmol, 1.2 equiv) according to the general procedure in the presence of  $\text{Rh}_2(\text{esp})_2$  (1.5 mg, 0.002 mmol, 1 mol%). The crude product was purified by flash chromatography on silica gel (Petroleum ether/ EtOAc = 20:1 to 5:1) to give the desired product as a white solid (56.5 mg, 82%), mp: 144-146 °C.

$R_f$  (Petroleum ether/ EtOAc 5:1) = 0.15.

$^1\text{H NMR}$  (300 MHz,  $\text{CDCl}_3$ ):  $\delta$  (ppm) 7.42-7.36 (m, 3H), 7.36-7.26 (m, 6H), 7.19-7.11 (m, 3H), 6.53 (d,  $J = 9.5$  Hz, 2H), 6.15 (td,  $J = 6.7, 1.2$  Hz, 1H), 5.40 (d,  $J = 9.5$  Hz, 1H), 3.77 (s, 3H).

$^{13}\text{C NMR}$  (75 MHz,  $\text{CDCl}_3$ ):  $\delta$  (ppm) 169.7, 162.0, 149.8, 140.5, 139.8, 138.0, 136.1, 129.3, 128.8, 128.6, 128.4, 128.3, 127.7, 121.0, 119.4, 106.1, 61.1, 53.0.

**HRMS (ESI):** calculated for  $\text{C}_{22}\text{H}_{19}\text{NO}_3\text{Na}$   $[\text{M}+\text{Na}]^+$ : 368.1257; Found: 368.1255.

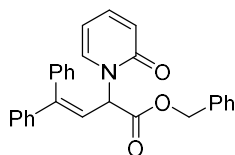

***benzyl 2-(2-oxopyridin-1(2H)-yl)-4,4-diphenylbut-3-enoate (3ka)***

Prepared from benzyl pyridin-2-yl carbonate (45.8 mg, 0.2 mmol, 1.0 equiv) and cycloprop-2-ene-1,1-diyldibenzene (46.1 mg, 0.24 mmol, 1.2 equiv) according to the general procedure in the presence of  $\text{Rh}_2(\text{PTTL})_4$  (2.5 mg, 0.002 mmol, 1 mol%). The crude product was purified by flash chromatography on silica gel (Petroleum ether/ EtOAc = 20:1 to 5:1) to give the desired product as colorless sticky oil (39.6 mg, 47%).

$R_f$  (Petroleum ether/ EtOAc 5:1) = 0.2.

$^1\text{H NMR}$  (300 MHz,  $\text{CDCl}_3$ ):  $\delta$  (ppm) 7.38-7.21 (m, 14H), 7.18 (dd,  $J = 7.0, 1.4$  Hz, 1H), 7.12-7.06 (m, 2H), 6.54 (d,  $J = 9.2$  Hz, 1H), 6.48 (d,  $J = 9.6$  Hz, 1H), 6.14 (td,  $J = 6.7, 0.9$  Hz, 1H), 5.46 (d,  $J = 9.6$  Hz, 1H), 5.22 (q,  $J = 13.0$  Hz, 2H).

$^{13}\text{C NMR}$  (75 MHz,  $\text{CDCl}_3$ ):  $\delta$  (ppm) 169.0, 162.1, 150.0, 140.6, 140.0, 138.0, 136.1, 135.6, 129.3, 128.8, 128.6, 128.4, 128.3, 128.27, 128.1, 127.7, 121.0, 119.3, 106.1, 67.4, 61.2.

**HRMS (ESI):** calculated for  $\text{C}_{28}\text{H}_{23}\text{NO}_3\text{Na}$   $[\text{M}+\text{Na}]^+$ : 444.1570; Found: 444.1567.

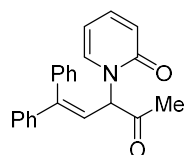

***1-(4-oxo-1,1-diphenylpent-1-en-3-yl)pyridin-2(1H)-one (3la)***

Prepared from pyridin-2-yl acetate (27.4 mg, 0.2 mmol, 1.0 equiv) and cycloprop-2-ene-1,1-diyldibenzene (46.1 mg, 0.24 mmol, 1.2 equiv) according to the general procedure in the presence of  $\text{Rh}_2(\text{PTTL})_4$  (2.5 mg, 0.002 mmol, 1 mol%). The crude product was

purified by flash chromatography on silica gel (Petroleum ether/ EtOAc = 20:1 to 5:1) to give the desired product as a white solid (54.6 mg, 83%), mp: 96-97 °C.

$R_f$  (Petroleum ether/ EtOAc 5:1) = 0.3.

$^1\text{H NMR}$  (300 MHz,  $\text{CDCl}_3$ ):  $\delta$  (ppm) 7.44-7.38 (m, 3H), 7.37-7.26 (m, 7H), 7.16-7.01 (m, 2H), 6.58-6.51 (m, 1H), 6.27 (d,  $J = 10.2$  Hz, 1H), 6.22 (td,  $J = 6.8, 1.5$  Hz, 1H), 5.47 (d,  $J = 10.2$  Hz, 1H), 2.26 (s, 3H).

$^{13}\text{C NMR}$  (75 MHz,  $\text{CDCl}_3$ ):  $\delta$  (ppm) 202.2, 162.2, 151.7, 140.5, 140.0, 138.0, 135.9, 129.0, 128.9, 128.6, 128.5, 127.8, 120.7, 118.6, 106.3, 66.8, 28.0.

**HRMS (ESI)**: calculated for  $\text{C}_{22}\text{H}_{19}\text{NO}_2\text{Na}$   $[\text{M}+\text{Na}]^+$ : 352.1308; Found: 352.1306.

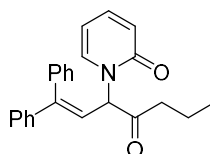

***1-(4-oxo-1,1-diphenylhept-1-en-3-yl)pyridin-2(1H)-one (3ma)***

Prepared from pyridin-2-yl butyrate (33.0 mg, 0.2 mmol, 1.0 equiv) and cycloprop-2-ene-1,1-diyldibenzene (46.1 mg, 0.24 mmol, 1.2 equiv) according to the general procedure in the presence of  $\text{Rh}_2(\text{PTTL})_4$  (2.5 mg, 0.002 mmol, 1 mol%). The crude product was purified by flash chromatography on silica gel (Petroleum ether/ EtOAc = 20:1 to 5:1) to give the desired product as a white solid (55.7 mg, 78%), mp: 116-118 °C.

$R_f$  (Petroleum ether/ EtOAc 5:1) = 0.3.

$^1\text{H NMR}$  (400 MHz,  $\text{CDCl}_3$ ):  $\delta$  (ppm) 7.44-7.25 (m, 10H), 7.14-7.09 (m, 2H), 6.53 (d,  $J = 9.2$  Hz, 1H), 6.27-6.17 (m, 2H), 5.52 (d,  $J = 10.4$  Hz, 1H), 2.63-2.46 (m, 2H), 1.69-1.55 (m, 2H), 0.90 (t,  $J = 7.4$  Hz, 3H).

$^{13}\text{C NMR}$  (75 MHz,  $\text{CDCl}_3$ ):  $\delta$  (ppm) 204.5, 162.1, 151.7, 140.6, 139.8, 138.0, 135.8, 129.0, 128.95, 128.8, 128.5, 128.49, 127.7, 120.6, 118.7, 106.1, 66.1, 42.6, 16.9, 13.7.

**HRMS (ESI)**: calculated for  $\text{C}_{24}\text{H}_{23}\text{NO}_2\text{Na}$   $[\text{M}+\text{Na}]^+$ : 380.1621; Found: 380.1616.

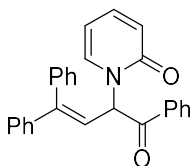

***methyl 1-(1-(tert-butoxy)-1-oxo-4,4-diphenylbut-3-en-2-yl)-2-oxo-1,2-dihydropyridine-4-carboxylate (3na)***

Prepared from pyridin-2-yl benzoate (39.8 mg, 0.2 mmol, 1.0 equiv) and cycloprop-2-ene-1,1-diyldibenzene (46.1 mg, 0.24 mmol, 1.2 equiv) according to the general procedure in the presence of  $\text{Rh}_2(\text{PTTL})_4$  (2.5 mg, 0.002 mmol, 1 mol%). The crude product was purified by flash chromatography on silica gel (Petroleum ether/ EtOAc = 20:1 to 5:1) to give the desired product as a white solid (74.2 mg, 95%), mp: 102-104 °C.

$R_f$  (Petroleum ether/ EtOAc 3:1) = 0.2.

$^1\text{H NMR}$  (400 MHz,  $\text{CDCl}_3$ ):  $\delta$  (ppm) 7.85-7.77 (m, 2H), 7.67 (dd,  $J = 6.8, 1.7$  Hz, 1H), 7.53-7.45 (m, 1H), 7.43-7.33 (m, 6H), 7.31-7.24 (m, 3H), 7.23-7.18 (m, 2H), 7.11-7.04 (m, 2H), 6.66 (d,  $J = 10.3$  Hz, 1H), 6.53 (d,  $J = 9.0$  Hz, 1H), 6.28 (td,  $J = 6.8, 1.3$  Hz, 1H), 6.18 (d,  $J = 10.3$  Hz, 1H).

$^{13}\text{C}$  NMR (75 MHz,  $\text{CDCl}_3$ ):  $\delta$  (ppm) 195.0, 162.0, 152.1, 140.6, 139.8, 137.9, 135.7, 135.0, 133.6, 129.0, 128.96, 128.9, 128.8, 128.77, 128.6, 128.5, 127.9, 120.4, 118.9, 106.2, 61.2.

HRMS (ESI): calculated for  $\text{C}_{27}\text{H}_{21}\text{NO}_2\text{Na}$   $[\text{M}+\text{Na}]^+$ : 414.1465; Found: 414.1456.

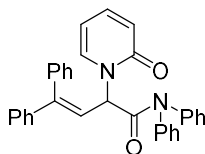

#### *2-(2-oxopyridin-1(2H)-yl)-N,N,4,4-tetraphenylbut-3-enamide (30a)*

Prepared from pyridin-2-yl diphenylcarbamate (58.0 mg, 0.2 mmol, 1.0 equiv) and cycloprop-2-ene-1,1-diyldibenzene (46.1 mg, 0.24 mmol, 1.2 equiv) according to the general procedure in the presence of  $\text{Rh}_2(\text{PTTL})_4$  (2.5 mg, 0.002 mmol, 1 mol%). The crude product was purified by flash chromatography on silica gel (Petroleum ether/ EtOAc = 10:1 to 1:1) to give the desired product as a white solid (93.5 mg, 97%), mp: 143-146 °C.

$R_f$  (Petroleum ether/ EtOAc 1:1) = 0.3.

$^1\text{H}$  NMR (300 MHz,  $\text{CDCl}_3$ ):  $\delta$  (ppm) 7.63 (dd,  $J$  = 6.8, 1.6 Hz, 1H), 7.50-7.38 (m, 2H), 7.36-7.26 (m, 10H), 7.22-7.12 (m, 5H), 7.09 (t,  $J$  = 7.5 Hz, 2H), 6.55-6.46 (m, 3H), 6.27 (d,  $J$  = 9.6 Hz, 1H), 6.22-6.17 (dt,  $J$  = 6.8, 1.0 Hz, 1H), 5.84 (d,  $J$  = 9.6 Hz, 1H).

$^{13}\text{C}$  NMR (75 MHz,  $\text{CDCl}_3$ ):  $\delta$  (ppm) 169.6, 162.3, 152.0, 142.7, 141.3, 140.9, 139.7, 137.0, 136.2, 129.6, 128.88, 128.85, 128.7, 128.5, 128.2, 128.0, 127.9, 126.4, 120.2, 118.6, 105.8, 59.0.

HRMS (ESI): calculated for  $\text{C}_{33}\text{H}_{26}\text{N}_2\text{O}_2\text{Na}$   $[\text{M}+\text{Na}]^+$ : 505.1886; Found: 505.1883.

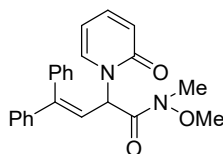

#### *N-methoxy-N-methyl-2-(2-oxopyridin-1(2H)-yl)-4,4-diphenylbut-3-enamide (3pa)*

Prepared from pyridin-2-yl methoxy(methyl)carbamate (36.4 mg, 0.2 mmol, 1.0 equiv) and cycloprop-2-ene-1,1-diyldibenzene (46.1 mg, 0.24 mmol, 1.2 equiv) according to the general procedure in the presence of  $\text{Rh}_2(\text{PTTL})_4$  (2.5 mg, 0.002 mmol, 1 mol%). The crude product was purified by flash chromatography on silica gel (Petroleum ether/ EtOAc = 10:1 to 1:1) to give the desired product as a white solid (65.8 mg, 88%), mp: 149-150 °C.

$R_f$  (Petroleum ether/ EtOAc 1:1) = 0.3.

$^1\text{H}$  NMR (300 MHz,  $\text{CDCl}_3$ ):  $\delta$  (ppm) 7.68 (dd,  $J$  = 6.8, 1.2 Hz, 1H), 7.38-7.29 (m, 9H), 7.10-7.04 (m, 2H), 6.51 (d,  $J$  = 8.8 Hz, 1H), 6.28-6.15 (m, 3H), 3.50 (s, 3H), 3.19 (s, 3H).

$^{13}\text{C}$  NMR (75 MHz,  $\text{CDCl}_3$ ):  $\delta$  (ppm) 162.2, 151.3, 140.6, 139.6, 138.1, 136.0, 129.1, 128.7, 128.5, 128.4, 128.3, 127.9, 120.2, 118.6, 105.9, 61.0, 56.6, 32.3.

HRMS (ESI): calculated for  $\text{C}_{23}\text{H}_{22}\text{N}_2\text{O}_3\text{Na}$   $[\text{M}+\text{Na}]^+$ : 397.1523; Found: 397.1521.

## Further exploration for Scheme 4

### Scheme 4-a



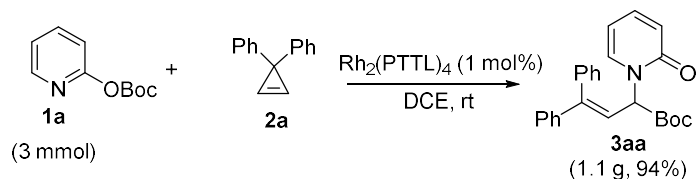

To a Schlenk flask was added  $\text{Rh}_2(\text{PTTL})_4$  (37.5 mg, 0.03 mmol, 1 mol%) under an argon atmosphere, then a solution of **1a** (0.585 g, 3 mmol, 1 equiv) and **2a** (0.691 g, 3.6 mmol, 1.2 equiv) in DCE (30 mL) was added. The resulting solution was stirred at rt for 4 h. The reaction solution was concentrated under vacuum; the residue was purified by column chromatography on silica gel (Petroleum ether/ EtOAc = 20:1 to 5:1) to give **3aa** as a white solid (1.1 g, 94%).

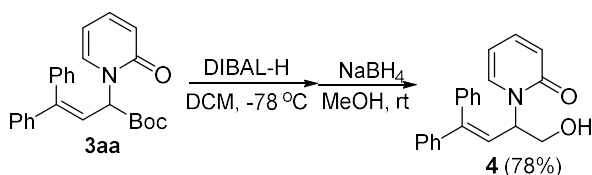

To a cold solution of **3aa** (77.4 mg, 0.2 mmol) in DCM (3 mL) was added dropwise DIBAL-H (0.3 mL, 0.3 mmol, 1 M in toluene) at  $-78^\circ\text{C}$ . After stirring at  $-78^\circ\text{C}$  for 30 min, MeOH (0.1 mL) was added dropwise to the reaction, followed by  $\text{Na}_2\text{SO}_4$  (0.5 g), celite (0.5 g) and water (2 drops). The mixture was stirred at rt for 30 min, then filtered and washed the solid with DCM. The filtrate was washed with brine, dried over  $\text{Na}_2\text{SO}_4$ , and concentrated under vacuum. The crude sticky residue was dissolved in MeOH (2 mL), then  $\text{NaBH}_4$  (11.4 mg, 0.3 mmol) was added. The reaction was stirred at rt for 30 min. The solvent was removed under vacuum, the residue was added water and extracted with EtOAc. The layer was washed with brine, dried over  $\text{Na}_2\text{SO}_4$ , concentrated and purified by flash chromatography on silica gel (Petroleum ether/EtOAc = 10:1 to 2:1) to give **4** as colorless sticky oil (49.5 mg, 78%).

$R_f$  (Petroleum ether/ EtOAc 1:1) = 0.2.

$^1\text{H NMR}$  (300 MHz,  $\text{CDCl}_3$ ):  $\delta$  (ppm) 7.39-7.23 (m, 9H), 7.16 (dd,  $J = 6.8, 1.1$  Hz, 1H), 7.08-7.01 (m, 2H), 6.56 (d,  $J = 9.0$  Hz, 1H), 6.49 (d,  $J = 9.0$  Hz, 1H), 6.13 (td,  $J = 6.8, 1.1$  Hz, 1H), 5.21-5.06 (m, 1H), 4.04-3.87 (m, 2H), 3.80 (s, 1H).

$^{13}\text{C NMR}$  (75 MHz,  $\text{CDCl}_3$ ):  $\delta$  (ppm) 163.3, 147.9, 140.9, 139.4, 138.6, 136.7, 129.0, 128.6, 128.3, 128.2, 128.0, 127.5, 121.8, 121.0, 106.5, 65.0, 61.1.

**HRMS (ESI)**: calculated for  $\text{C}_{21}\text{H}_{19}\text{NO}_2\text{Na}$  [ $\text{M}+\text{Na}$ ] $^+$ : 340.1308; Found: 340.1309.

#### Scheme 4-b

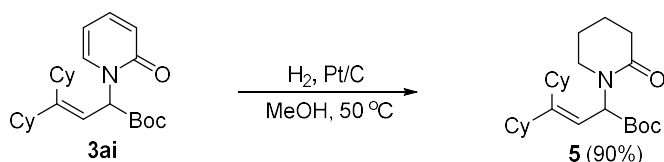

To a solution of **3ai** (79.8 mg, 0.20 mmol) in anhydrous MeOH (3 mL) was added 10% Pt/C (19.5 mg), then degassed and refilled with  $\text{H}_2$ . The reaction mixture was stirred under  $\text{H}_2$  balloon at  $50^\circ\text{C}$  for 12 h. After the reaction was complete (monitored by TLC), the reaction mixture was filtrated through a pad of celite and washed with EtOAc. The filtrate was concentrated under reduced pressure and purified by silica gel column chromatography (EA/PE = 5:1) to afford **5**

(72.5 mg, 90%) as yellow oil.

$R_f$  (Petroleum ether/ EtOAc 5:1) = 0.3.

$^1\text{H NMR}$  (300 MHz,  $\text{CDCl}_3$ ):  $\delta$  (ppm) 5.83 (d,  $J = 8.7$  Hz, 1H), 5.24 (d,  $J = 8.7$  Hz, 1H), 3.25 (t,  $J = 5.4$  Hz, 2H), 2.55-2.30 (m, 3H), 1.87-1.58 (m, 13H), 1.44 (s, 9H), 1.36-1.13 (m, 12H).

$^{13}\text{C NMR}$  (75 MHz,  $\text{CDCl}_3$ ):  $\delta$  (ppm) 171.0, 169.4, 158.3, 115.0, 81.2, 54.2, 44.2, 41.2, 39.9, 35.2, 34.9, 32.4, 30.6, 30.4, 28.0, 27.1, 27.0, 26.2, 26.16, 26.15, 26.06, 23.3, 21.2.

**HRMS (ESI)**: calculated for  $\text{C}_{25}\text{H}_{41}\text{NO}_3\text{Na}$   $[\text{M}+\text{Na}]^+$ : 426.2979; Found: 426.2979.

#### Scheme 4-c

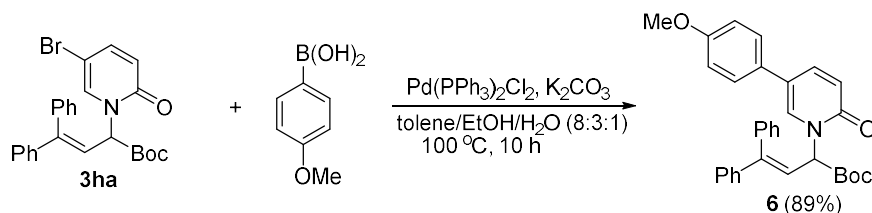

Under an argon atmosphere, **3ha** (93.2 mg, 0.2 mmol), PdCl<sub>2</sub>(PPh<sub>3</sub>)<sub>2</sub> (7.8 mg, 0.01 mmol), 4-methoxyphenylboronic acid (36.5 mg, 0.24 mmol) and K<sub>2</sub>CO<sub>3</sub> (82.8 mg, 0.6 mmol) were placed in a dry Schlenk tube, then toluene (8 mL), EtOH (3 mL) and H<sub>2</sub>O (1 mL) were added. The resulted mixture was stirred at 100 °C for 10 h under argon atmosphere. Toluene and EtOH were removed under reduced pressure, the residual slurry was dissolved in H<sub>2</sub>O and extracted with DCM. The combined layers were dried over MgSO<sub>4</sub>, filtered and evaporated; the residue was purified by flash chromatography on silica gel (Petroleum ether/EtOAc = 15:1 to 5:1) to give **6** as colorless sticky oil (87.8 mg, 89%).

$R_f$  (Petroleum ether/ EtOAc 5:1) = 0.2.

$^1\text{H NMR}$  (300 MHz,  $\text{CDCl}_3$ ):  $\delta$  (ppm) 7.56 (dd,  $J = 9.4, 2.0$  Hz, 1H), 7.43-7.33 (m, 3H), 7.32-7.25 (m, 8H), 7.21-7.14 (m, 2H), 6.99-6.88 (m, 2H), 6.59 (d,  $J = 9.4$  Hz, 1H), 6.54 (d,  $J = 9.4$  Hz, 1H), 5.45 (d,  $J = 9.4$  Hz, 1H), 3.82 (s, 3H), 1.48 (s, 9H).

$^{13}\text{C NMR}$  (75 MHz,  $\text{CDCl}_3$ ):  $\delta$  (ppm) 168.2, 161.2, 159.1, 149.3, 140.9, 139.6, 138.3, 133.0, 129.4, 129.3, 128.7, 128.4, 128.3, 128.2, 127.7, 127.1, 120.7, 120.2, 119.7, 114.5, 82.76, 61.8, 55.4, 28.0.

**HRMS (ESI)**: calculated for  $\text{C}_{32}\text{H}_{31}\text{NO}_4\text{Na}$   $[\text{M}+\text{Na}]^+$ : 516.2145; Found: 516.2143.

#### X-ray crystallographic data

The crystal structures have been deposited at the Cambridge Crystallographic Data Centre (CCDC 2131456, **3ha**). The data can be obtained free of charge via the internet at <https://www.ccdc.cam.ac.uk/structures/>.

**Method of crystallization:** A solution of **3ha** in DCM and Petroleum ether was evaporated the solvent slowly at room temperature.

#### Crystal data and structure for 3ha

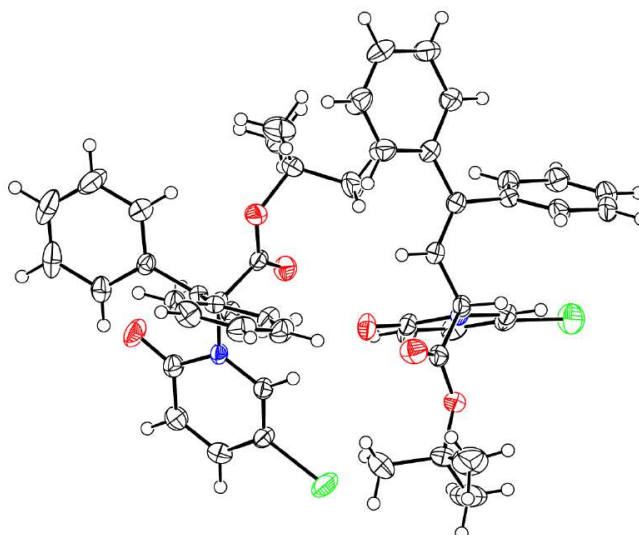

**Figure 1.** ORTEP diagram of **3ha**. Thermal ellipsoids are shown at the 50% level.

|                                   |                                                   |                  |
|-----------------------------------|---------------------------------------------------|------------------|
| Empirical formula                 | C <sub>25</sub> H <sub>24</sub> BrNO <sub>3</sub> |                  |
| Formula weight                    | 466.38                                            |                  |
| Temperature                       | 296.15 K                                          |                  |
| Wavelength                        | 0.71703 Å                                         |                  |
| Crystal system                    | triclinic                                         |                  |
| Space group                       | P -1                                              |                  |
| Unit cell dimensions              | a = 10.6644 (6) Å                                 | α = 75.708 (2) ° |
|                                   | b = 11.9643 (6) Å                                 | β = 85.239 (2) ° |
|                                   | c = 19.4199 (9) Å                                 | γ = 70.225 (2) ° |
| Volume                            | 2259.5 (2) Å <sup>3</sup>                         |                  |
| Z                                 | 4                                                 |                  |
| Density (calculated)              | 1.371 g/cm <sup>3</sup>                           |                  |
| Absorption coefficient            | 1.845 mm <sup>-1</sup>                            |                  |
| F(000)                            | 960                                               |                  |
| Crystal size                      | 0.12 x 0.12 x 0.1 mm <sup>3</sup>                 |                  |
| θ range for data collection       | 1.921 to 27.504°                                  |                  |
| Index ranges                      | -11 ≤ h ≤ 13, -15 ≤ k ≤ 15, -25 ≤ l ≤ 25          |                  |
| Reflections collected             | 21000                                             |                  |
| Independent reflections           | 10274 (R <sub>int</sub> = 0.0571)                 |                  |
| Completeness to θ = 25.242 °      | 99.1 %                                            |                  |
| Max. and min. transmission        | 0.7456 and 0.5741                                 |                  |
| Data / restraints / parameters    | 10274 /18/547                                     |                  |
| Goodness-of-fit on F <sup>2</sup> | 1.044                                             |                  |
| Final R indices [I > 2σ(I)]       | R <sub>1</sub> = 0.0563, wR <sub>2</sub> = 0.1399 |                  |
| R indices (all data)              | R <sub>1</sub> = 0.0823, wR <sub>2</sub> = 0.1511 |                  |
| Largest diff. peak and hole       | 0.499 and -0.858 e.Å <sup>-3</sup>                |                  |

## References

- Xu, G.; Chen, P.; Liu, P.; Tang, S.; Zhang, X.; Sun, J. *Angew. Chem. Int. Ed.* **2019**, *58*, 1980.

2. (a) Shintani, R.; Iino, R.; Nozaki, K. *J. Am. Chem. Soc.* **2014**, *136*, 7849. (b) Zhang, H.; Wang, B.; Yi, H.; Zhang, Y.; Wang, J. *Org. Lett.* **2015**, *17*, 3322. (c) Chen, J.; Guo, P.; Zhang, J.; Rong, J.; Sun, W.; Jiang, Y.; Loh, T.-P. *Angew. Chem. Int. Ed.* **2019**, *58*, 12674. (d) Ross, R. J.; Jeyaseelan, R.; Lautens, M. *Org. Lett.* **2020**, *22*, 4838.

8.55  
8.53  
7.79  
7.79  
7.78  
7.77  
7.67  
7.27

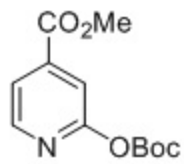

1f

400 MHz, CDCl<sub>3</sub>

3.97

1.58

0.00

0.98

0.98

0.93

3.00

9.00

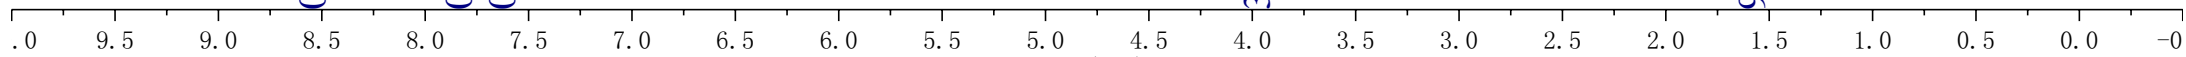

f1 (ppm)  
S19

—164.63  
—158.65  
/150.74  
/149.24  
—141.27

—121.38  
—115.75

—84.54

—52.94

—27.67

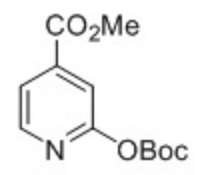

**1f**

100 MHz, CDCl<sub>3</sub>

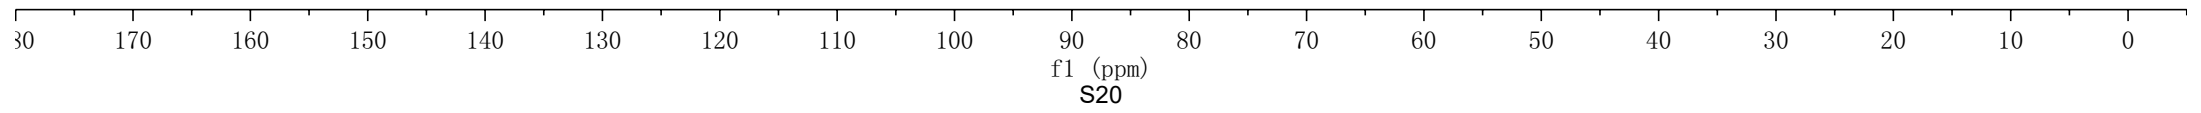

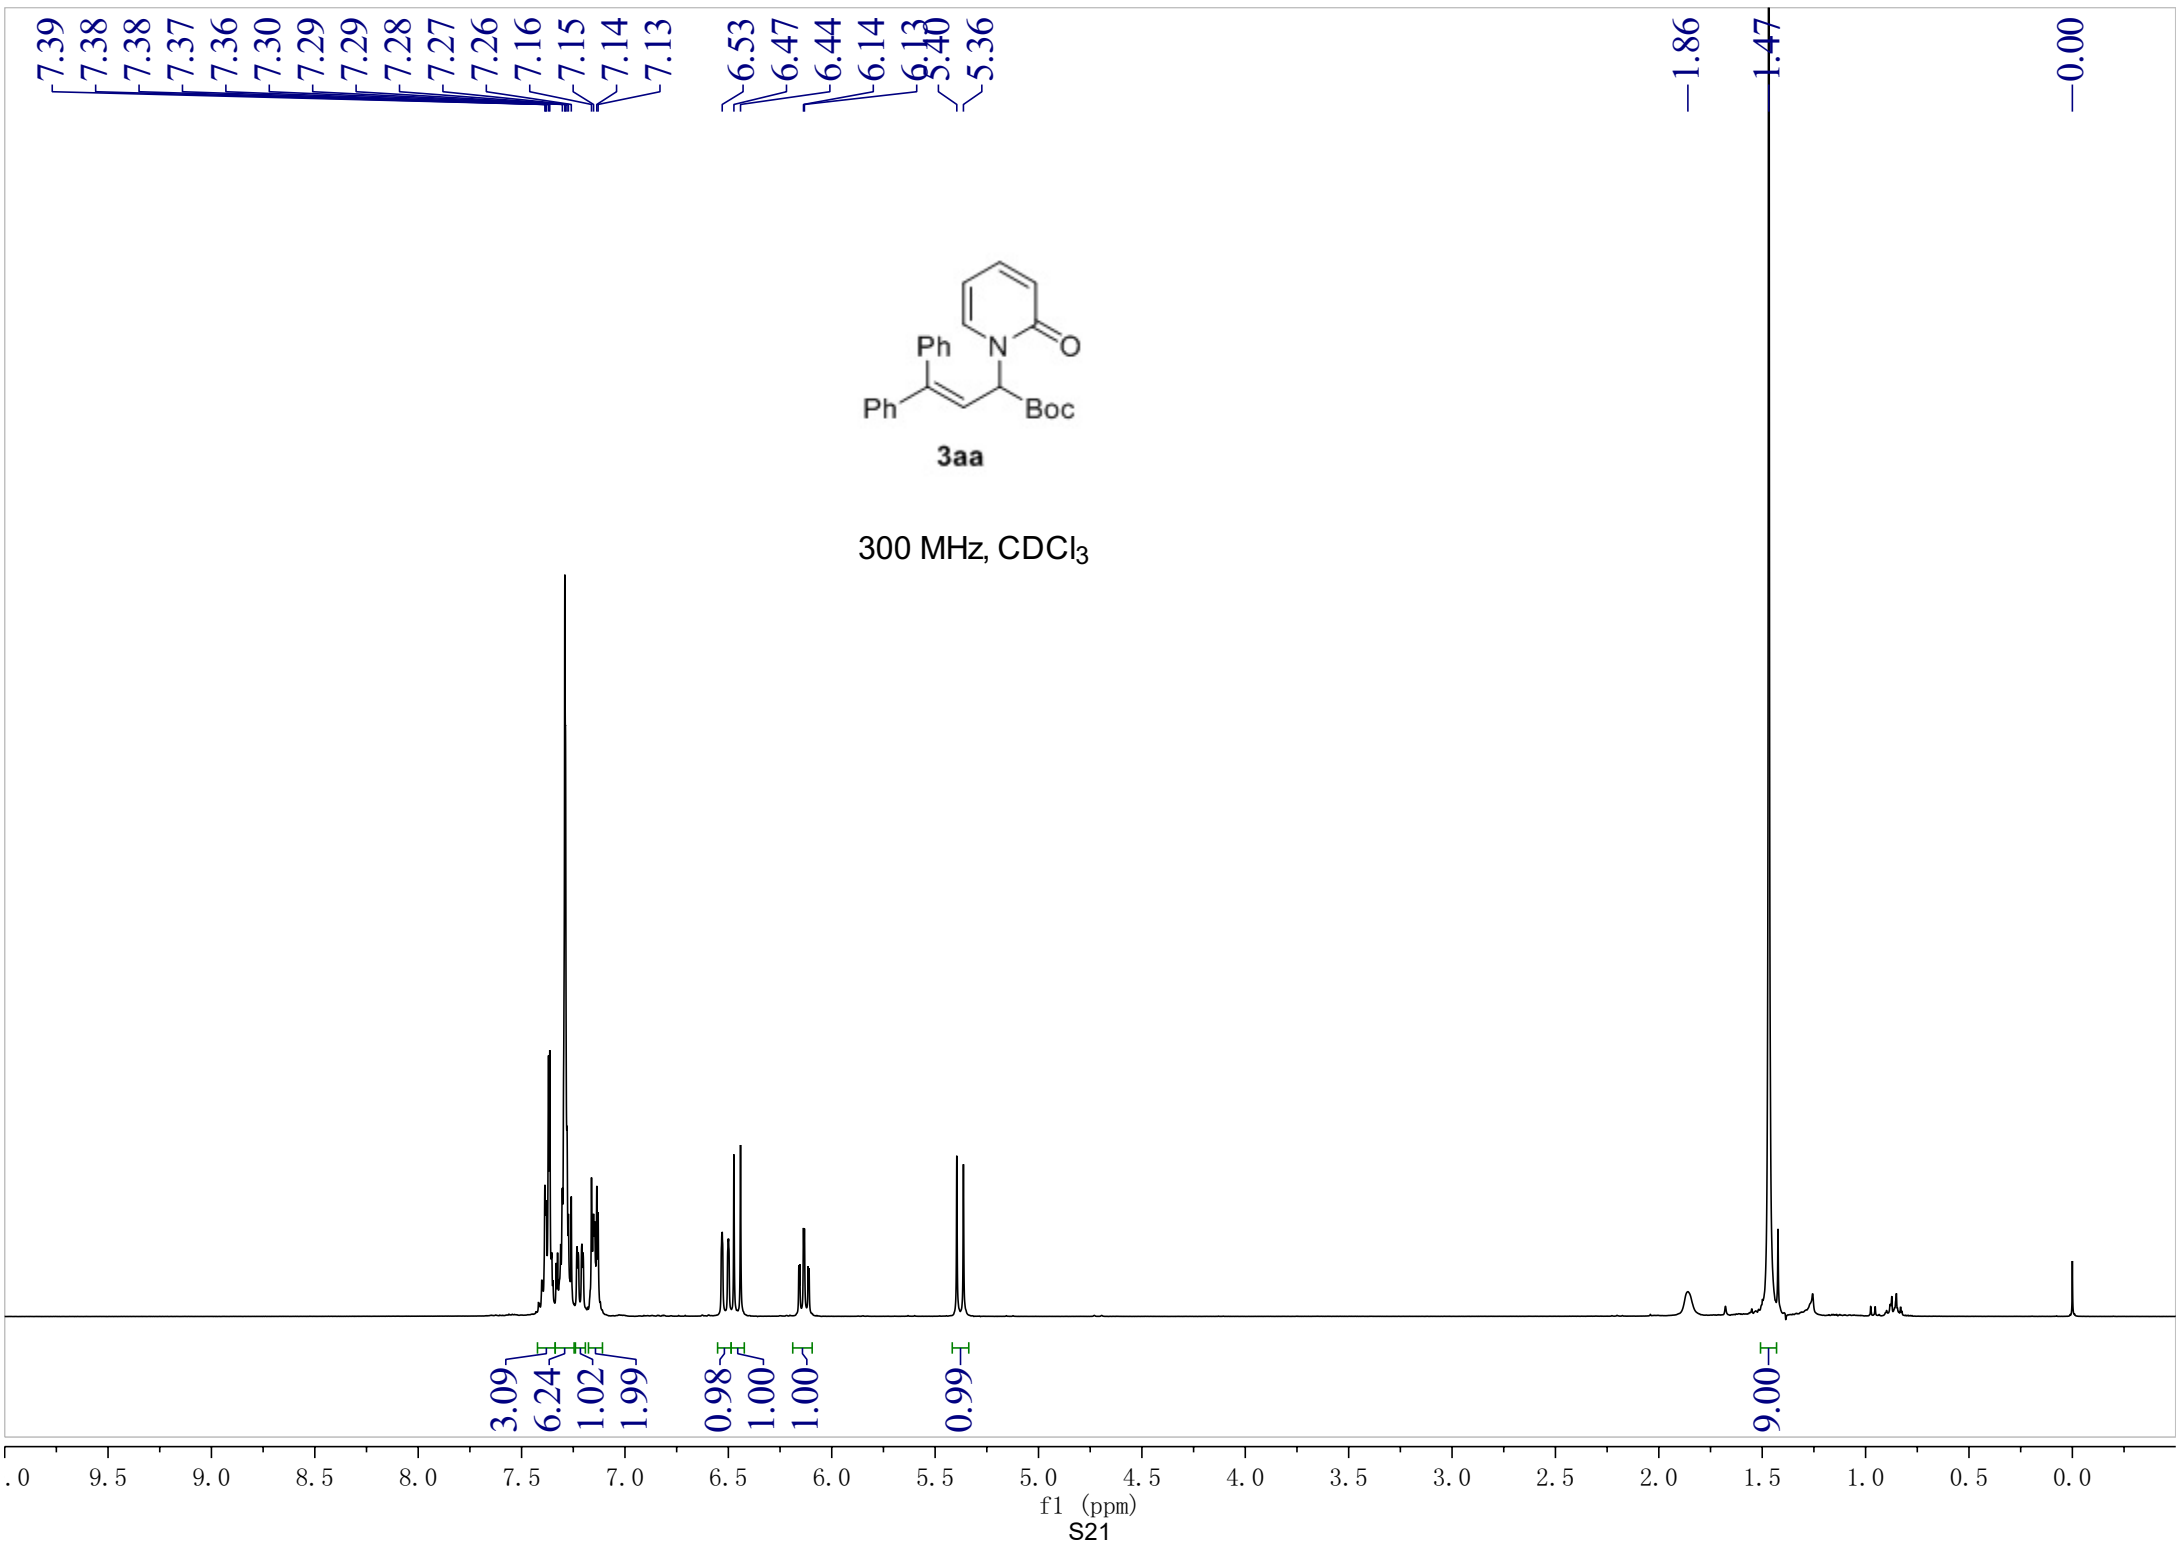

—168.27  
—162.10  
—149.49  
139.61  
136.23  
129.38  
128.76  
128.49  
128.42  
128.25  
127.73  
120.94  
120.10  
105.79

—82.71

—61.54

—28.03

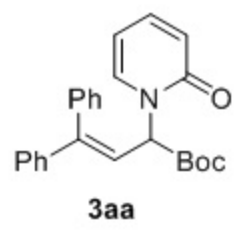

75 MHz, CDCl<sub>3</sub>

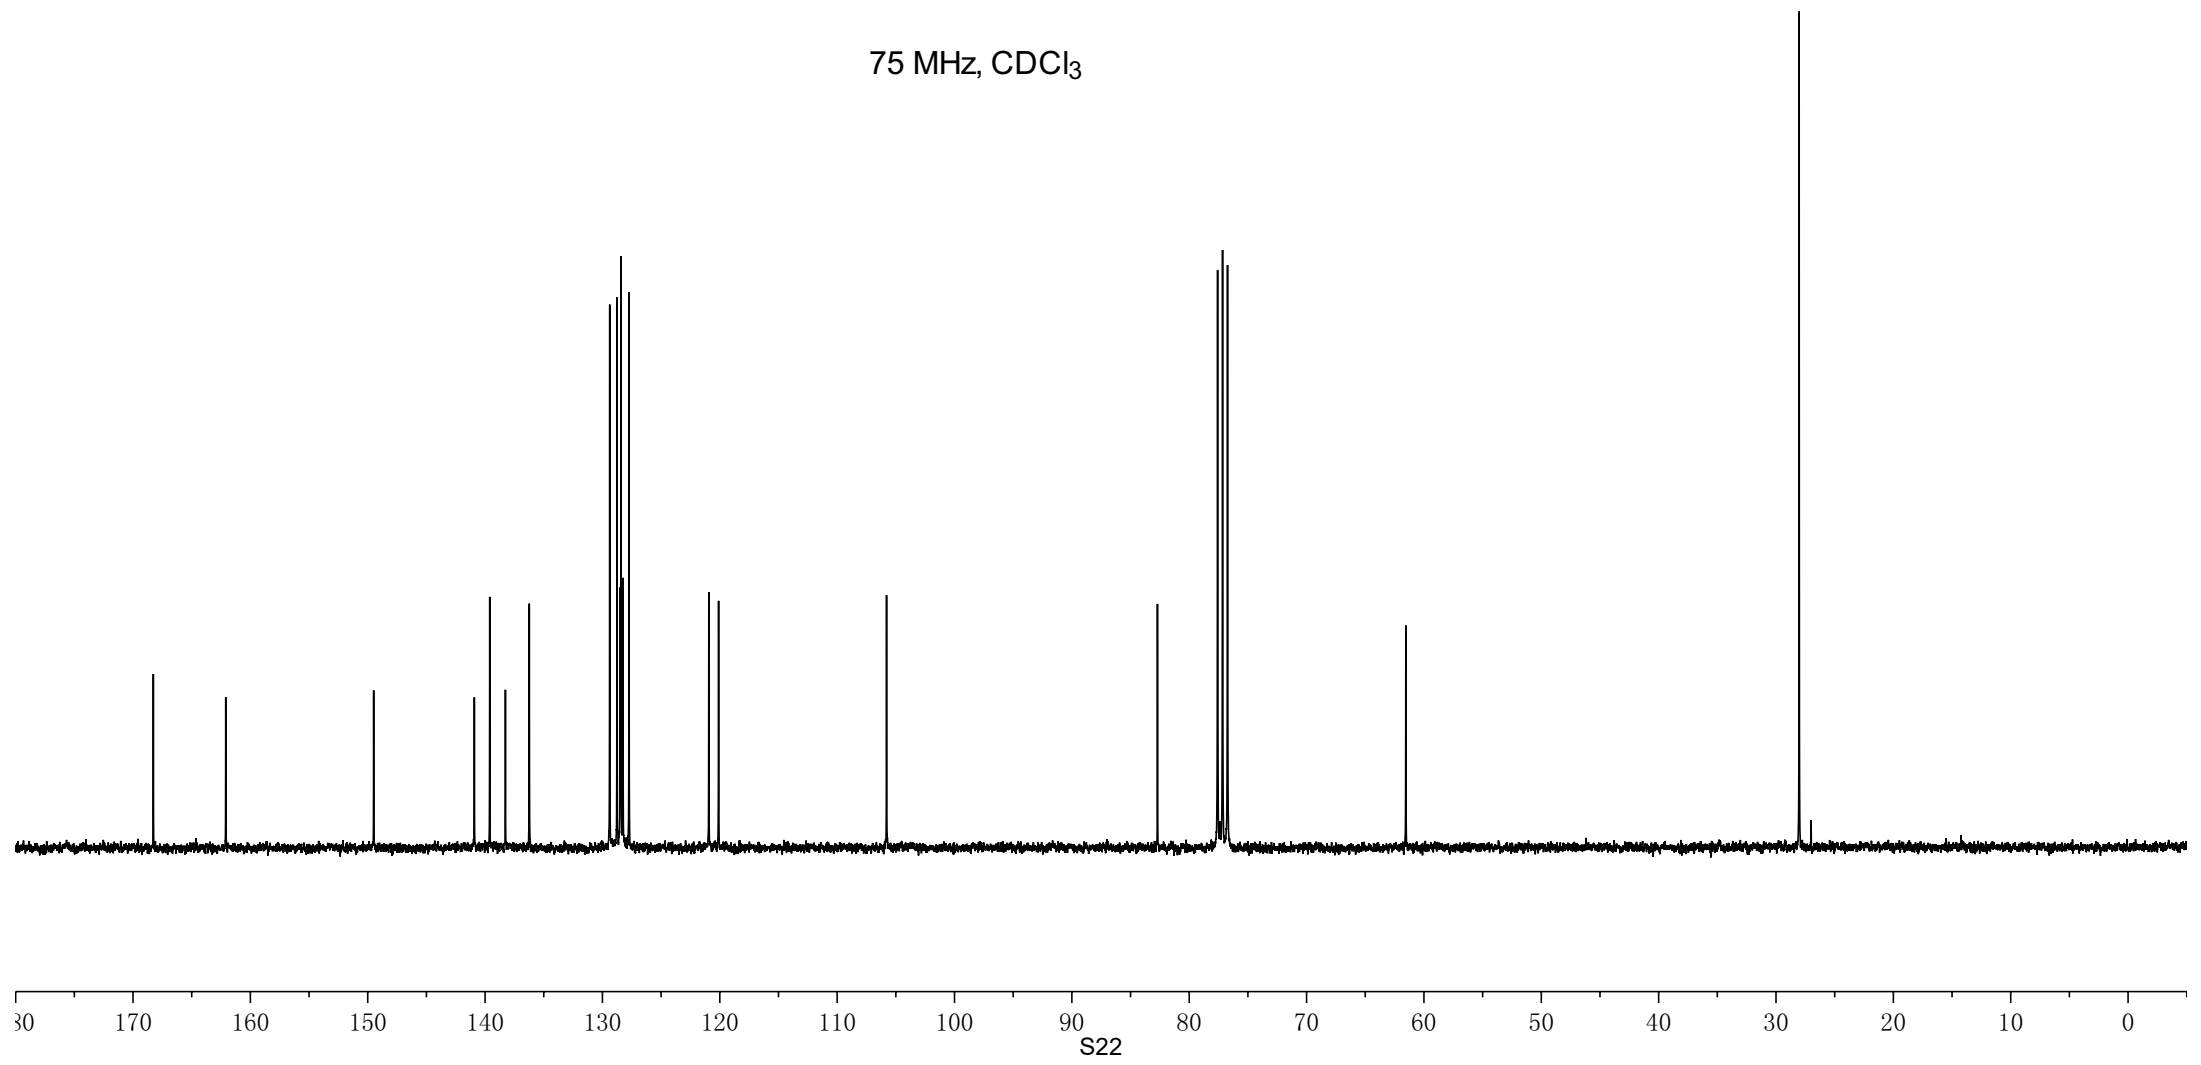



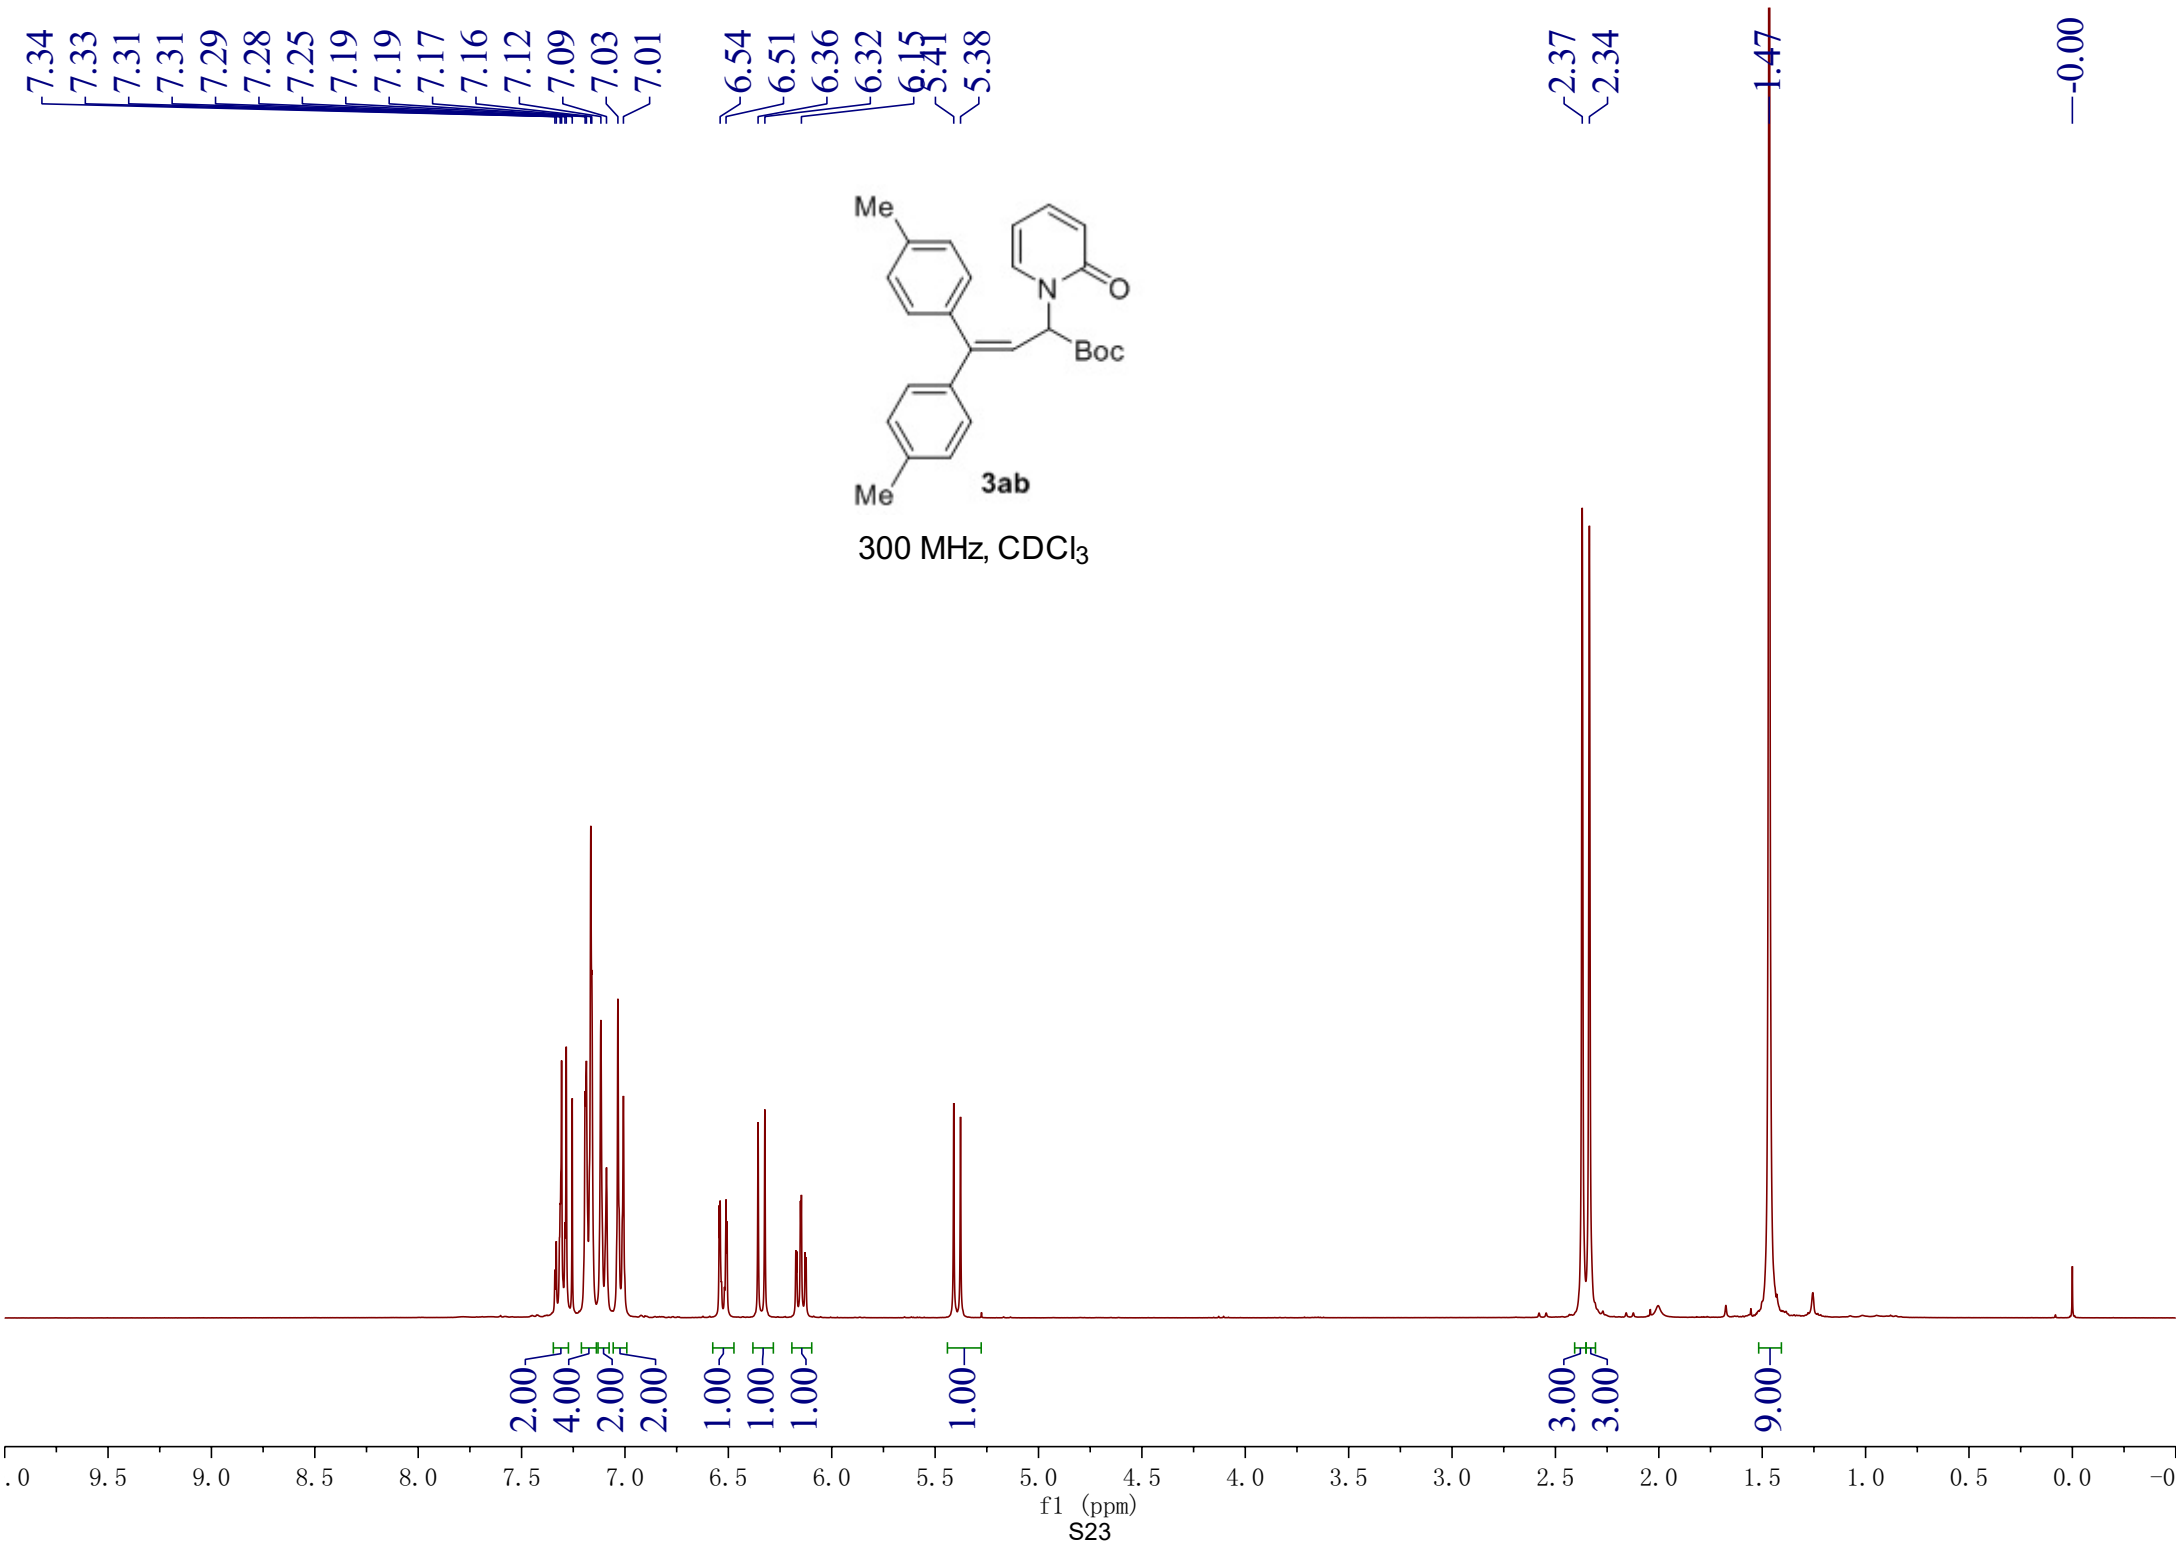

— 168.44

— 162.12

— 149.74

139.52

138.43

138.28

137.91

136.03

135.30

129.33

129.23

129.03

127.66

— 120.81

— 118.51

— 105.68

— 82.46

— 61.49

— 27.96

21.33

21.21

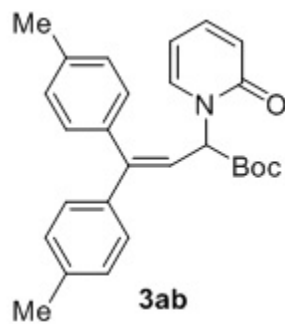

75 MHz, CDCl<sub>3</sub>

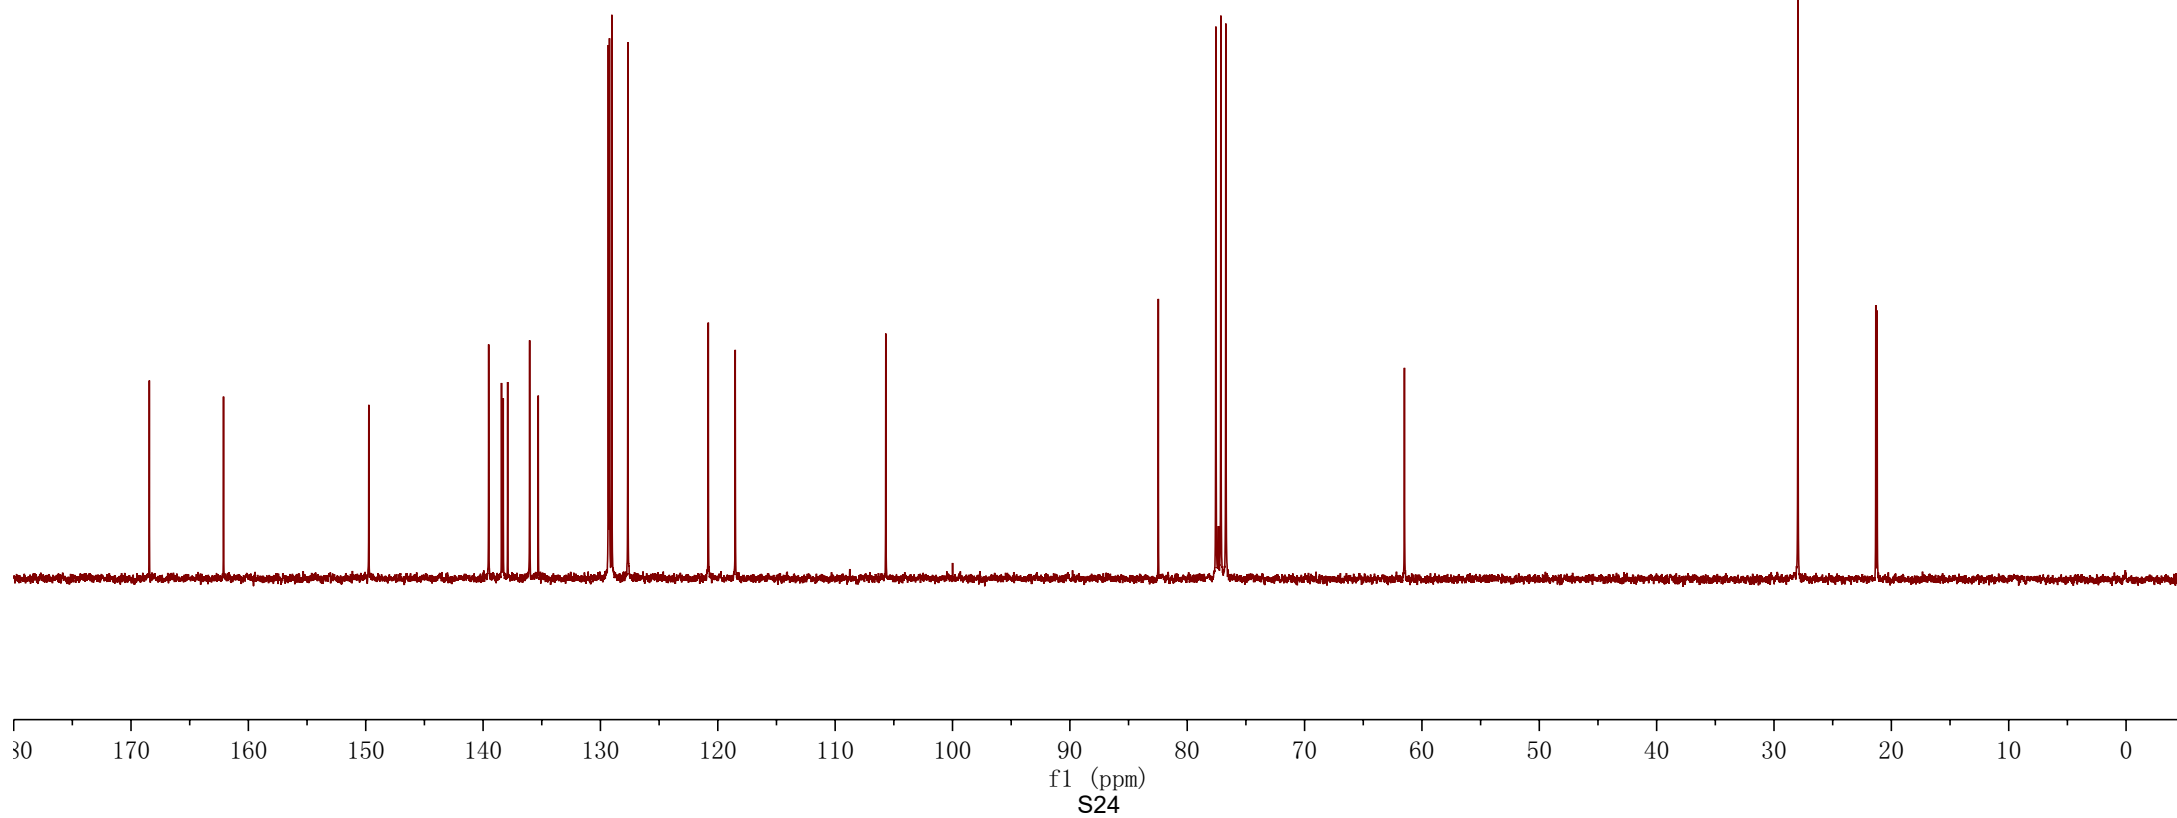

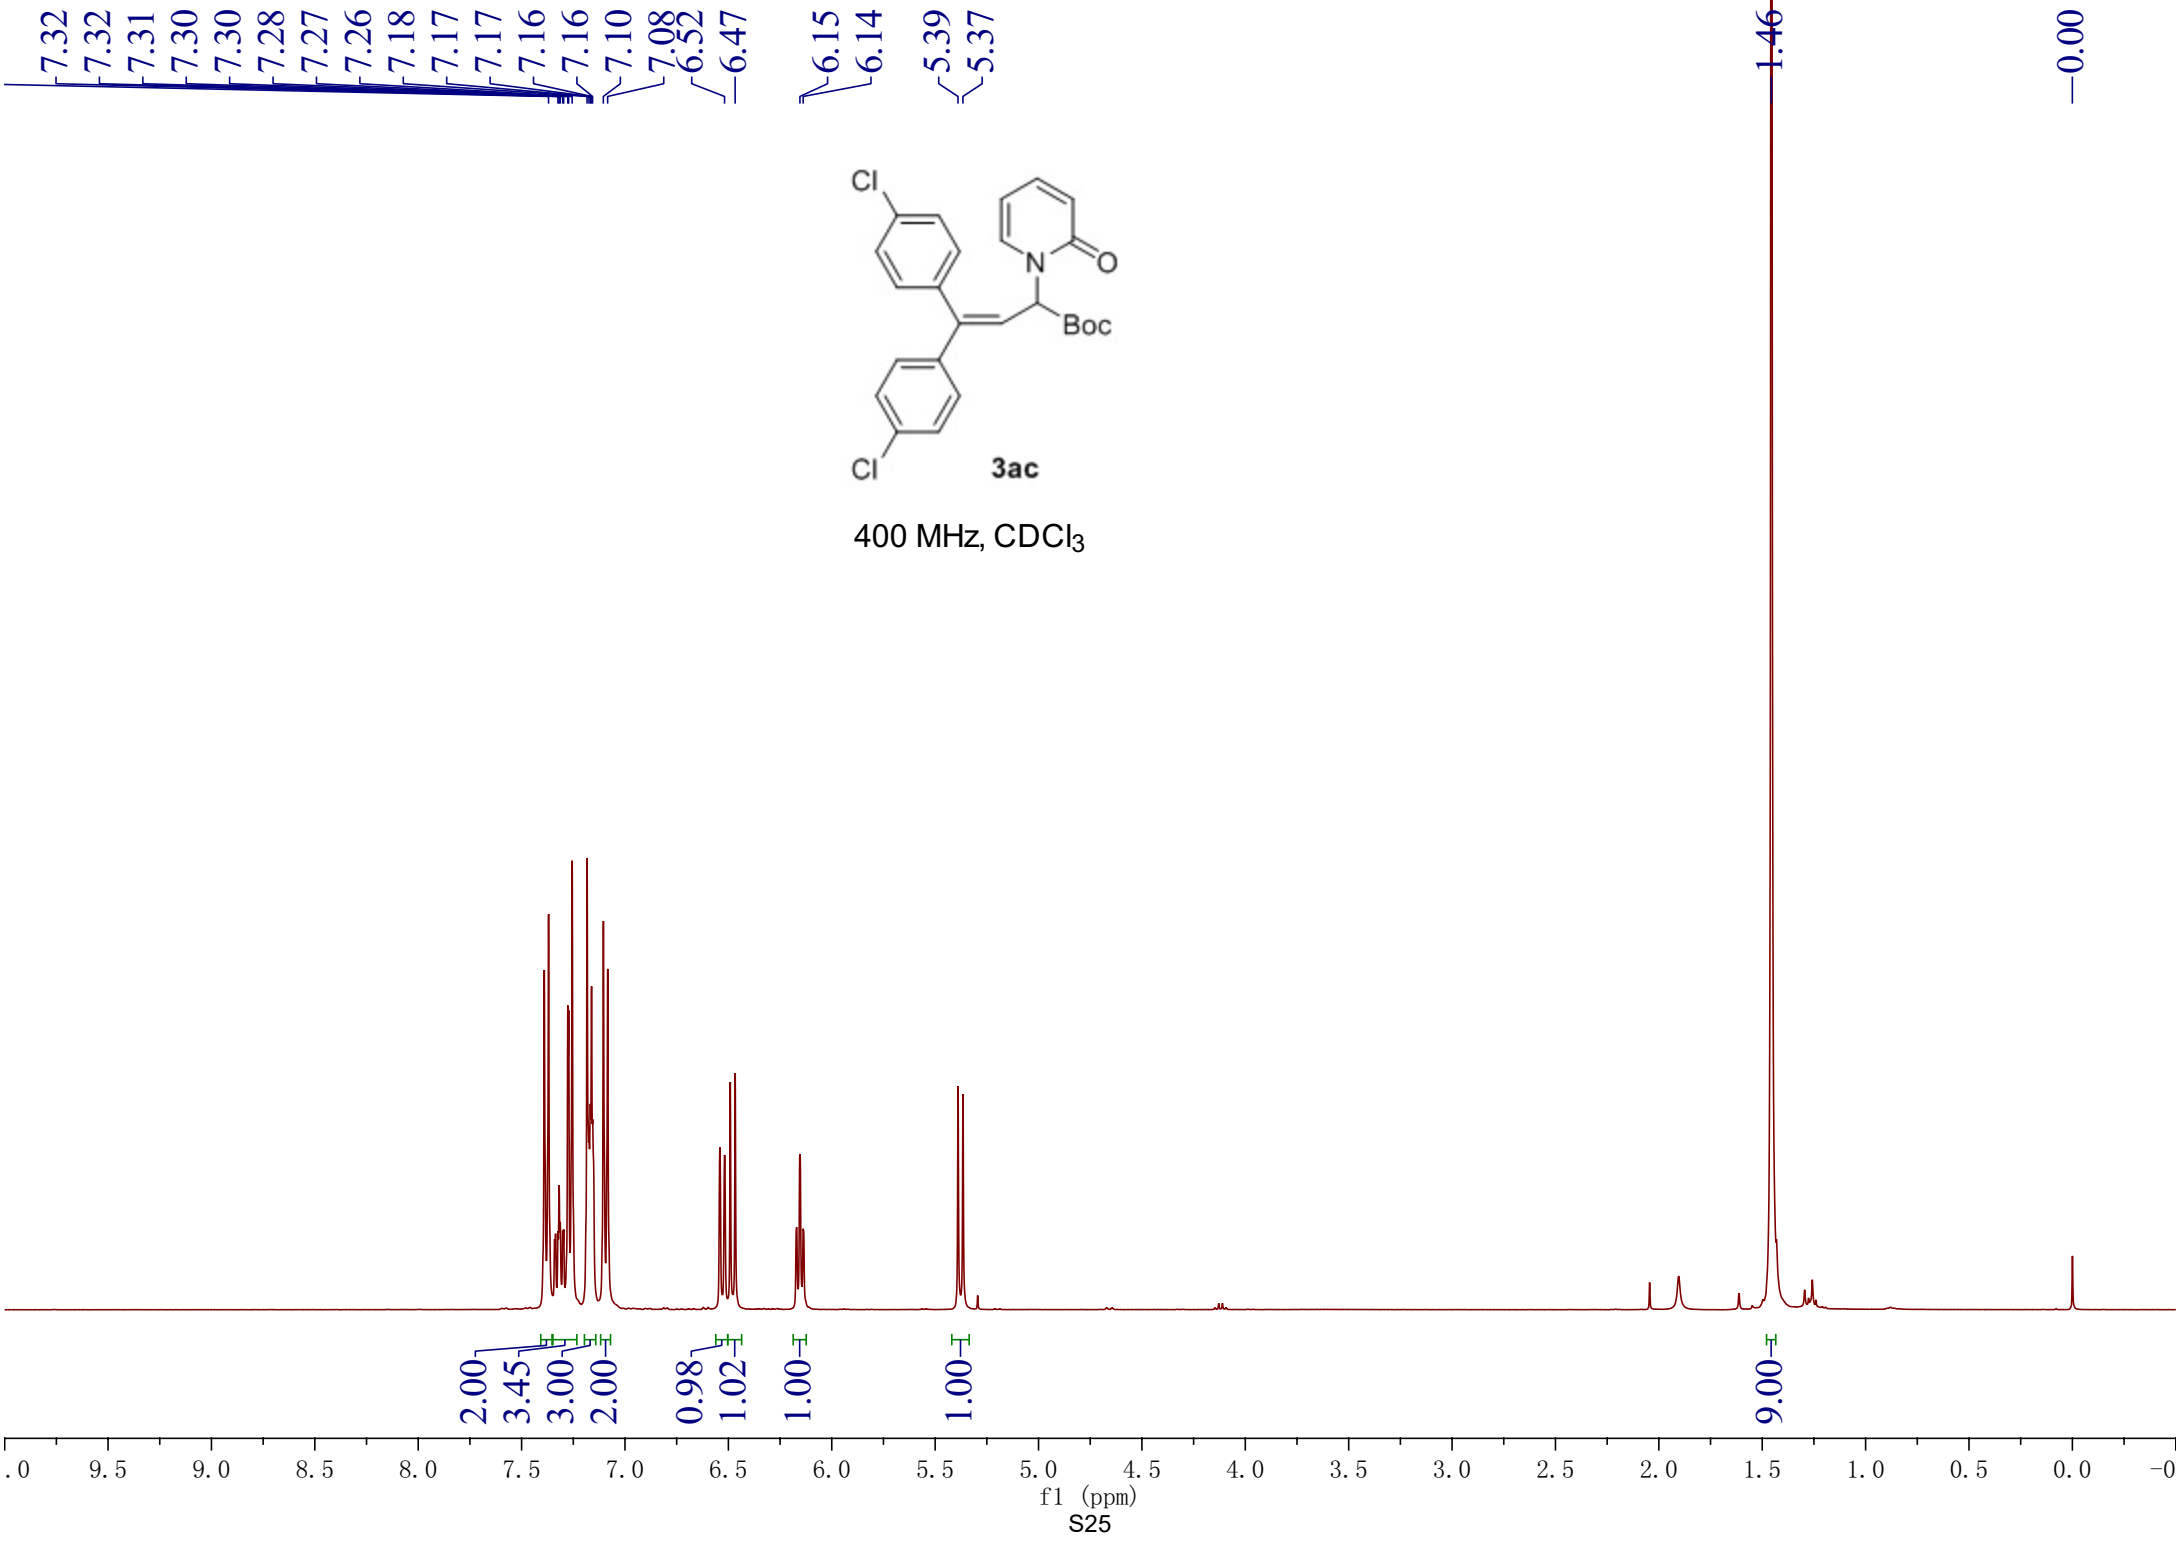

— 167.78  
— 161.87  
— 146.69  
139.66  
138.94  
136.21  
136.11  
134.57  
134.50  
130.74  
129.11  
128.90  
128.61  
121.36  
121.00

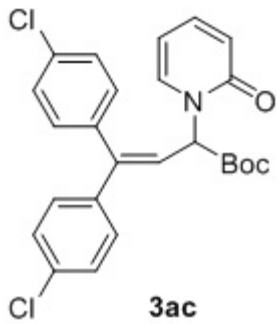

100 MHz, CDCl<sub>3</sub>

— 105.96

— 83.01

— 61.16

— 27.93

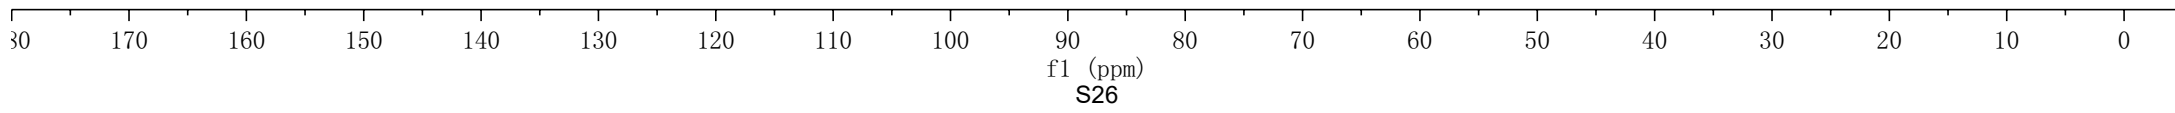

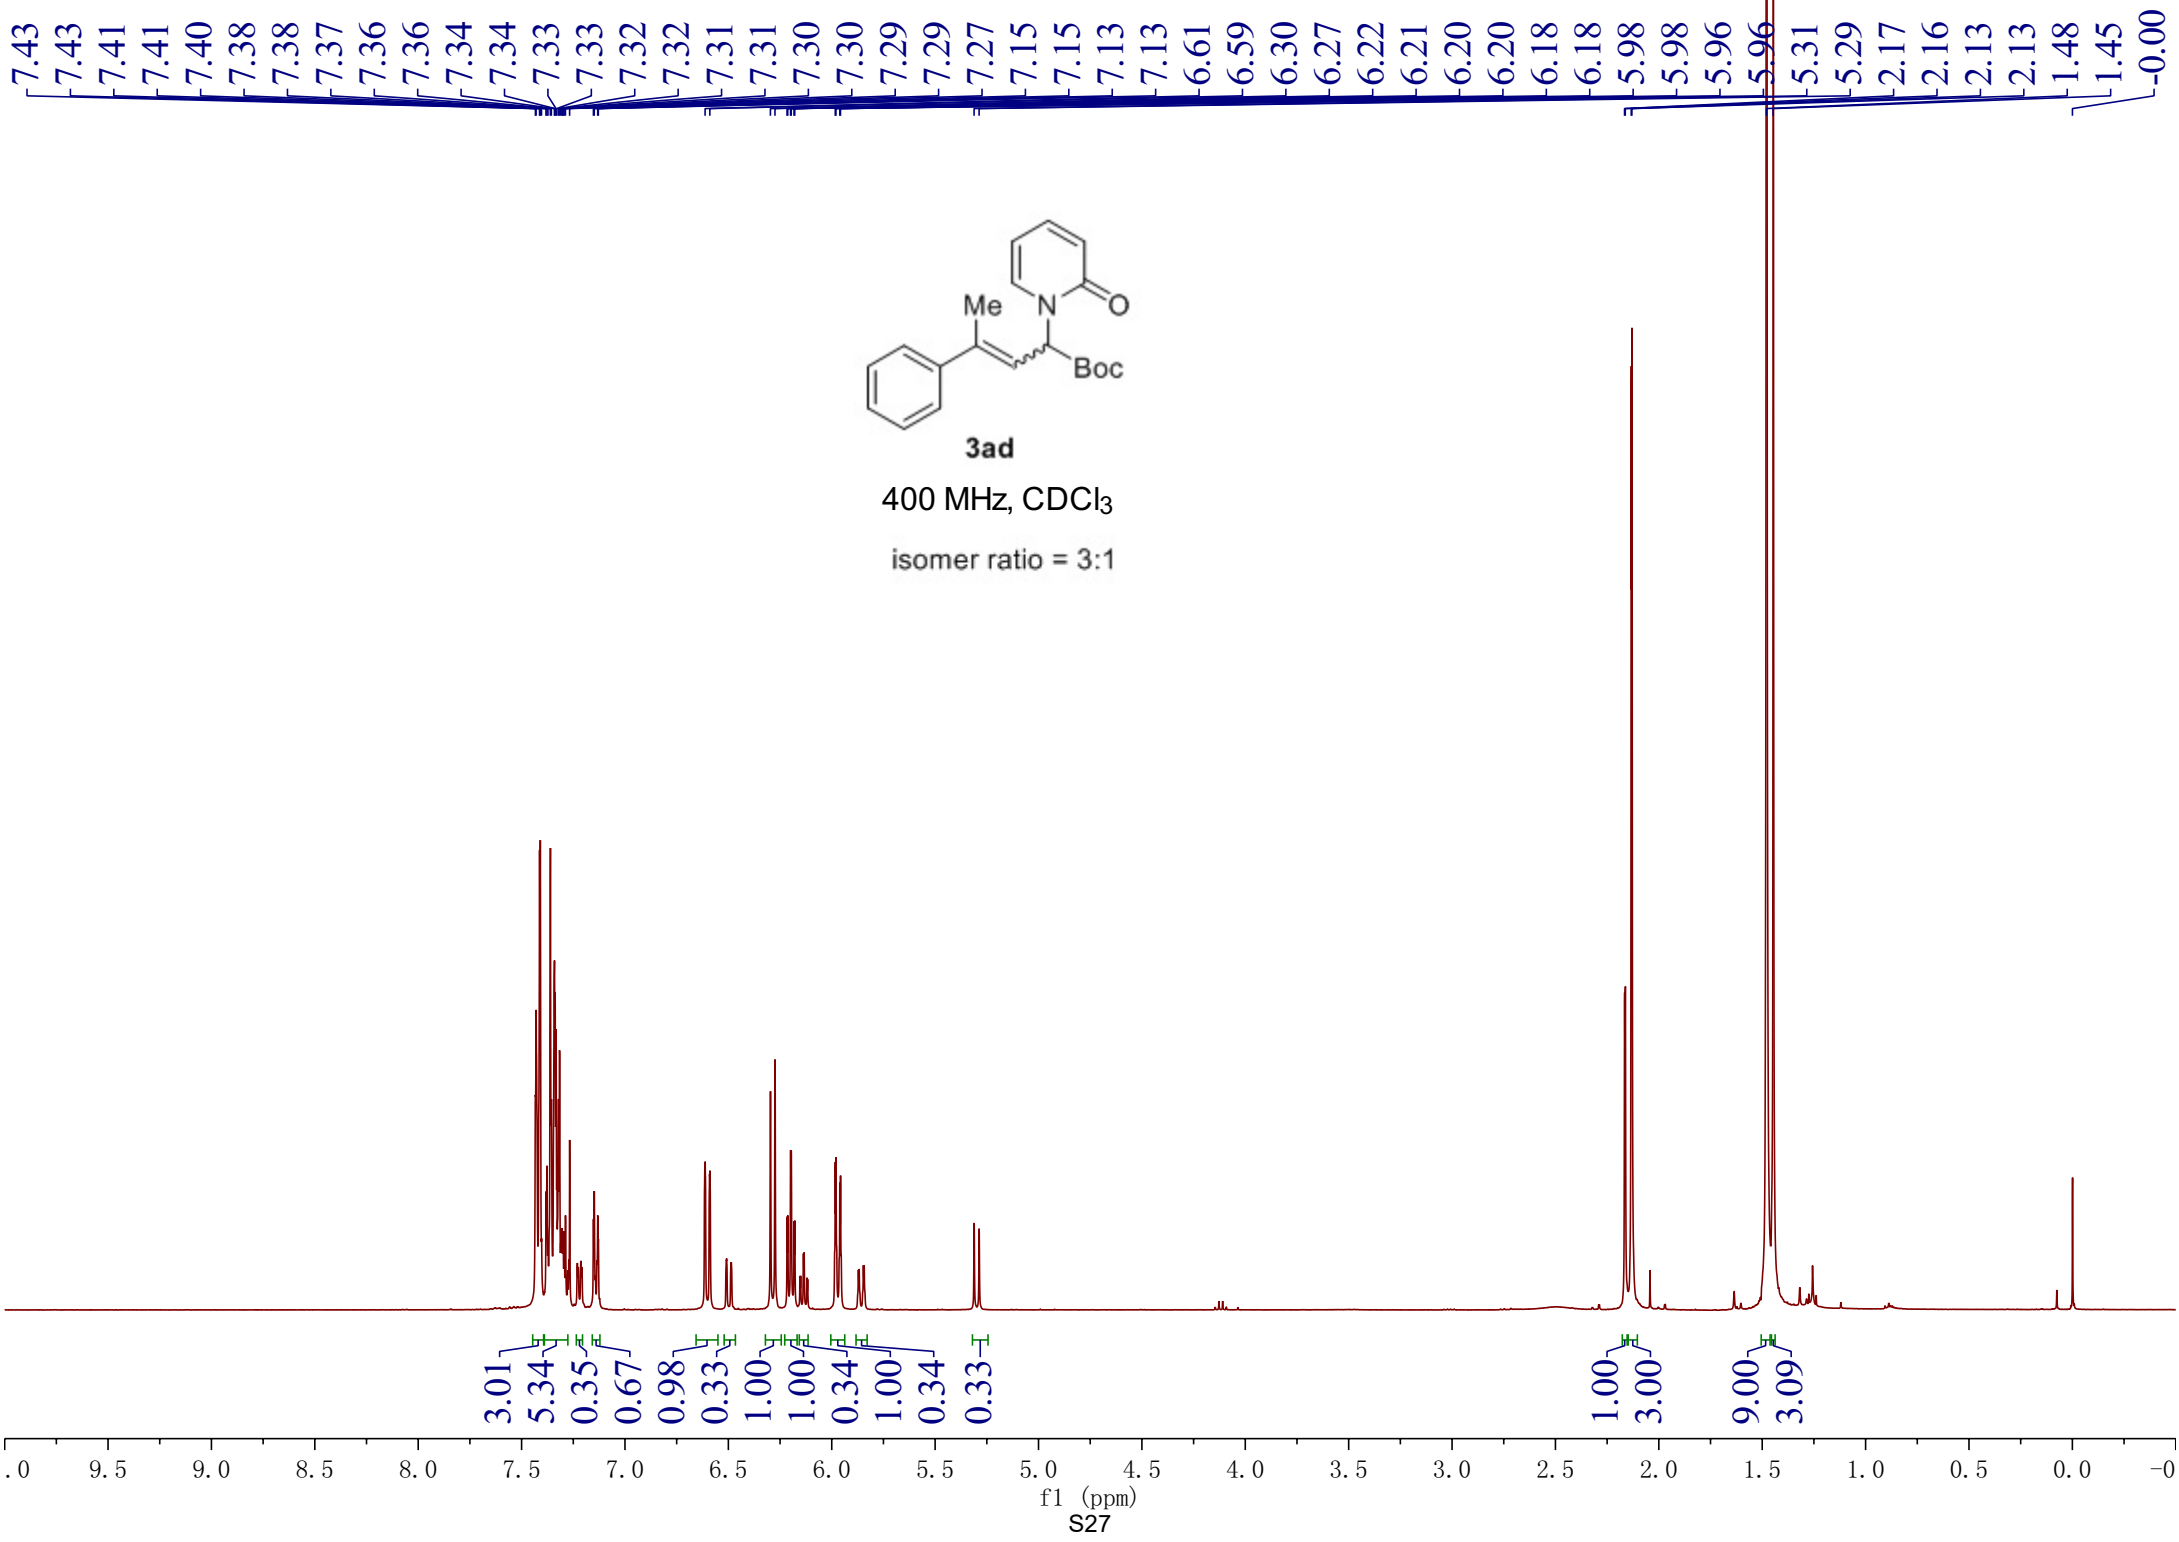

169.02  
168.56  
162.30  
162.04

145.05  
141.94  
139.51  
135.93  
135.53  
128.61  
128.47  
128.17  
127.28  
126.04  
120.71  
120.44  
119.57  
105.96  
105.54

82.84  
82.35

60.74  
56.92

27.97  
27.89  
26.23

17.10

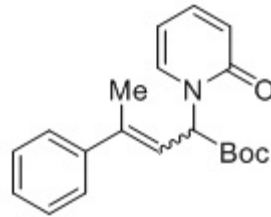

**3ad**

75 MHz, CDCl<sub>3</sub>

isomer ratio = 3:1

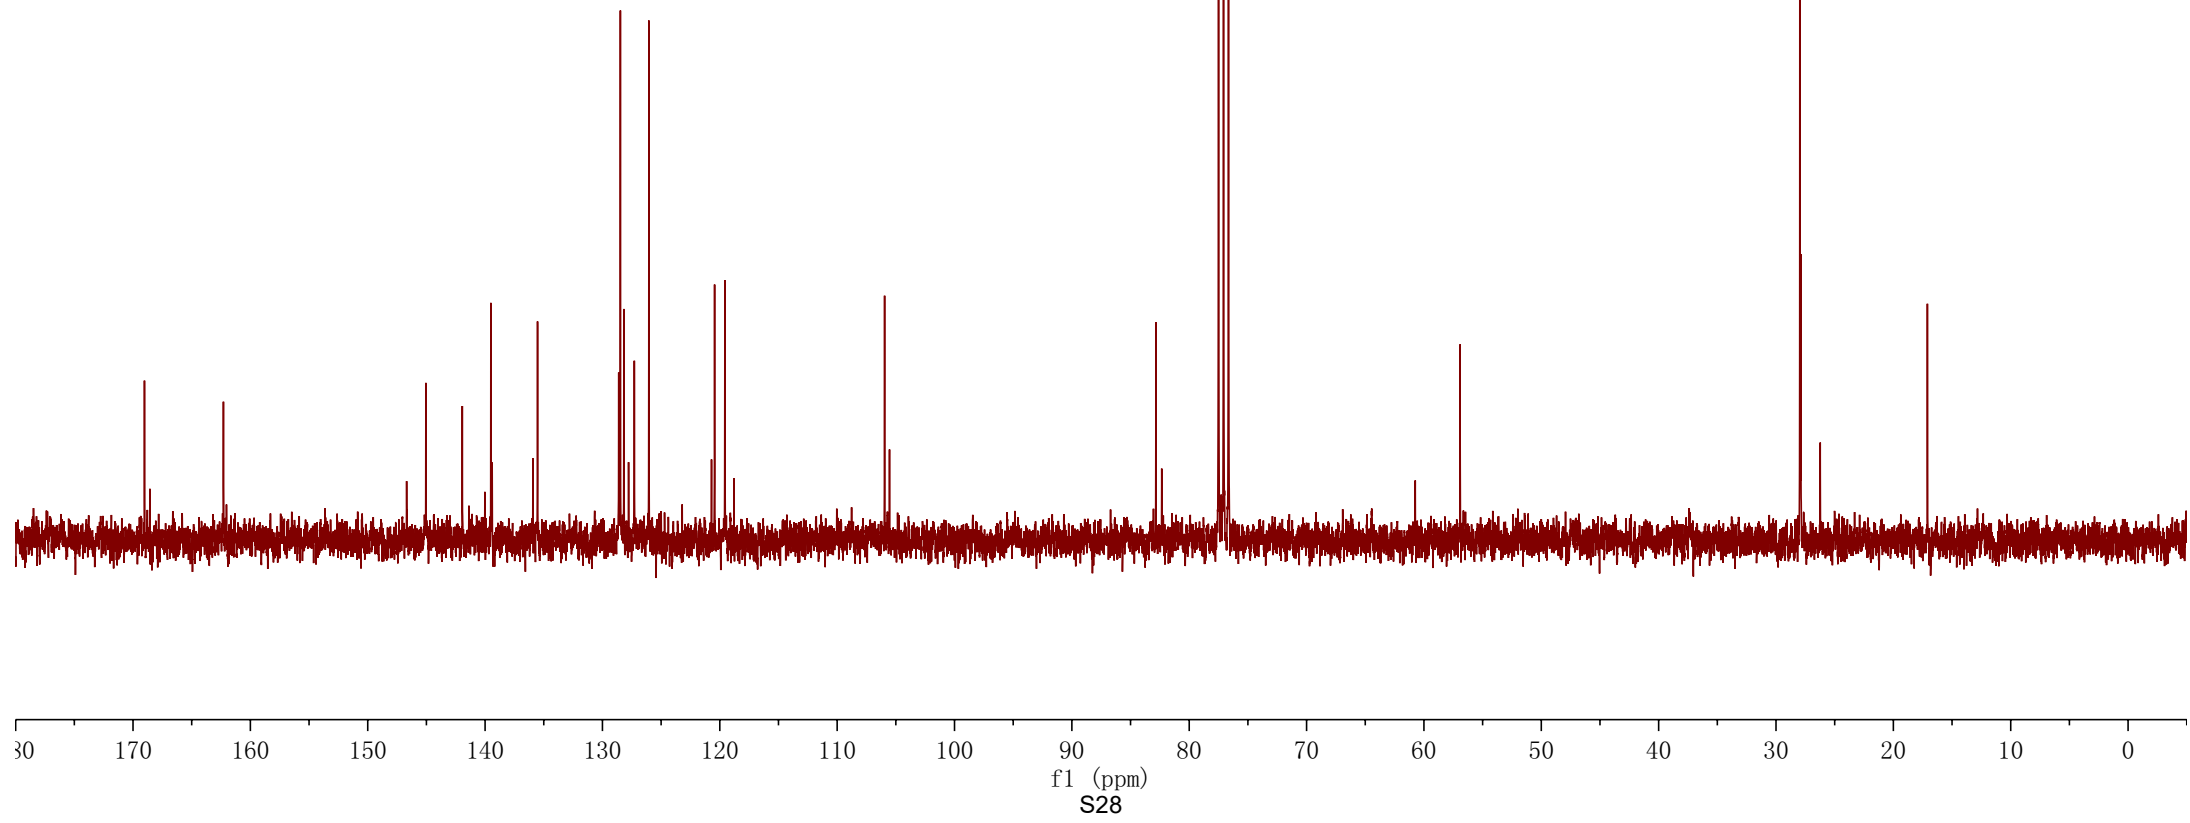

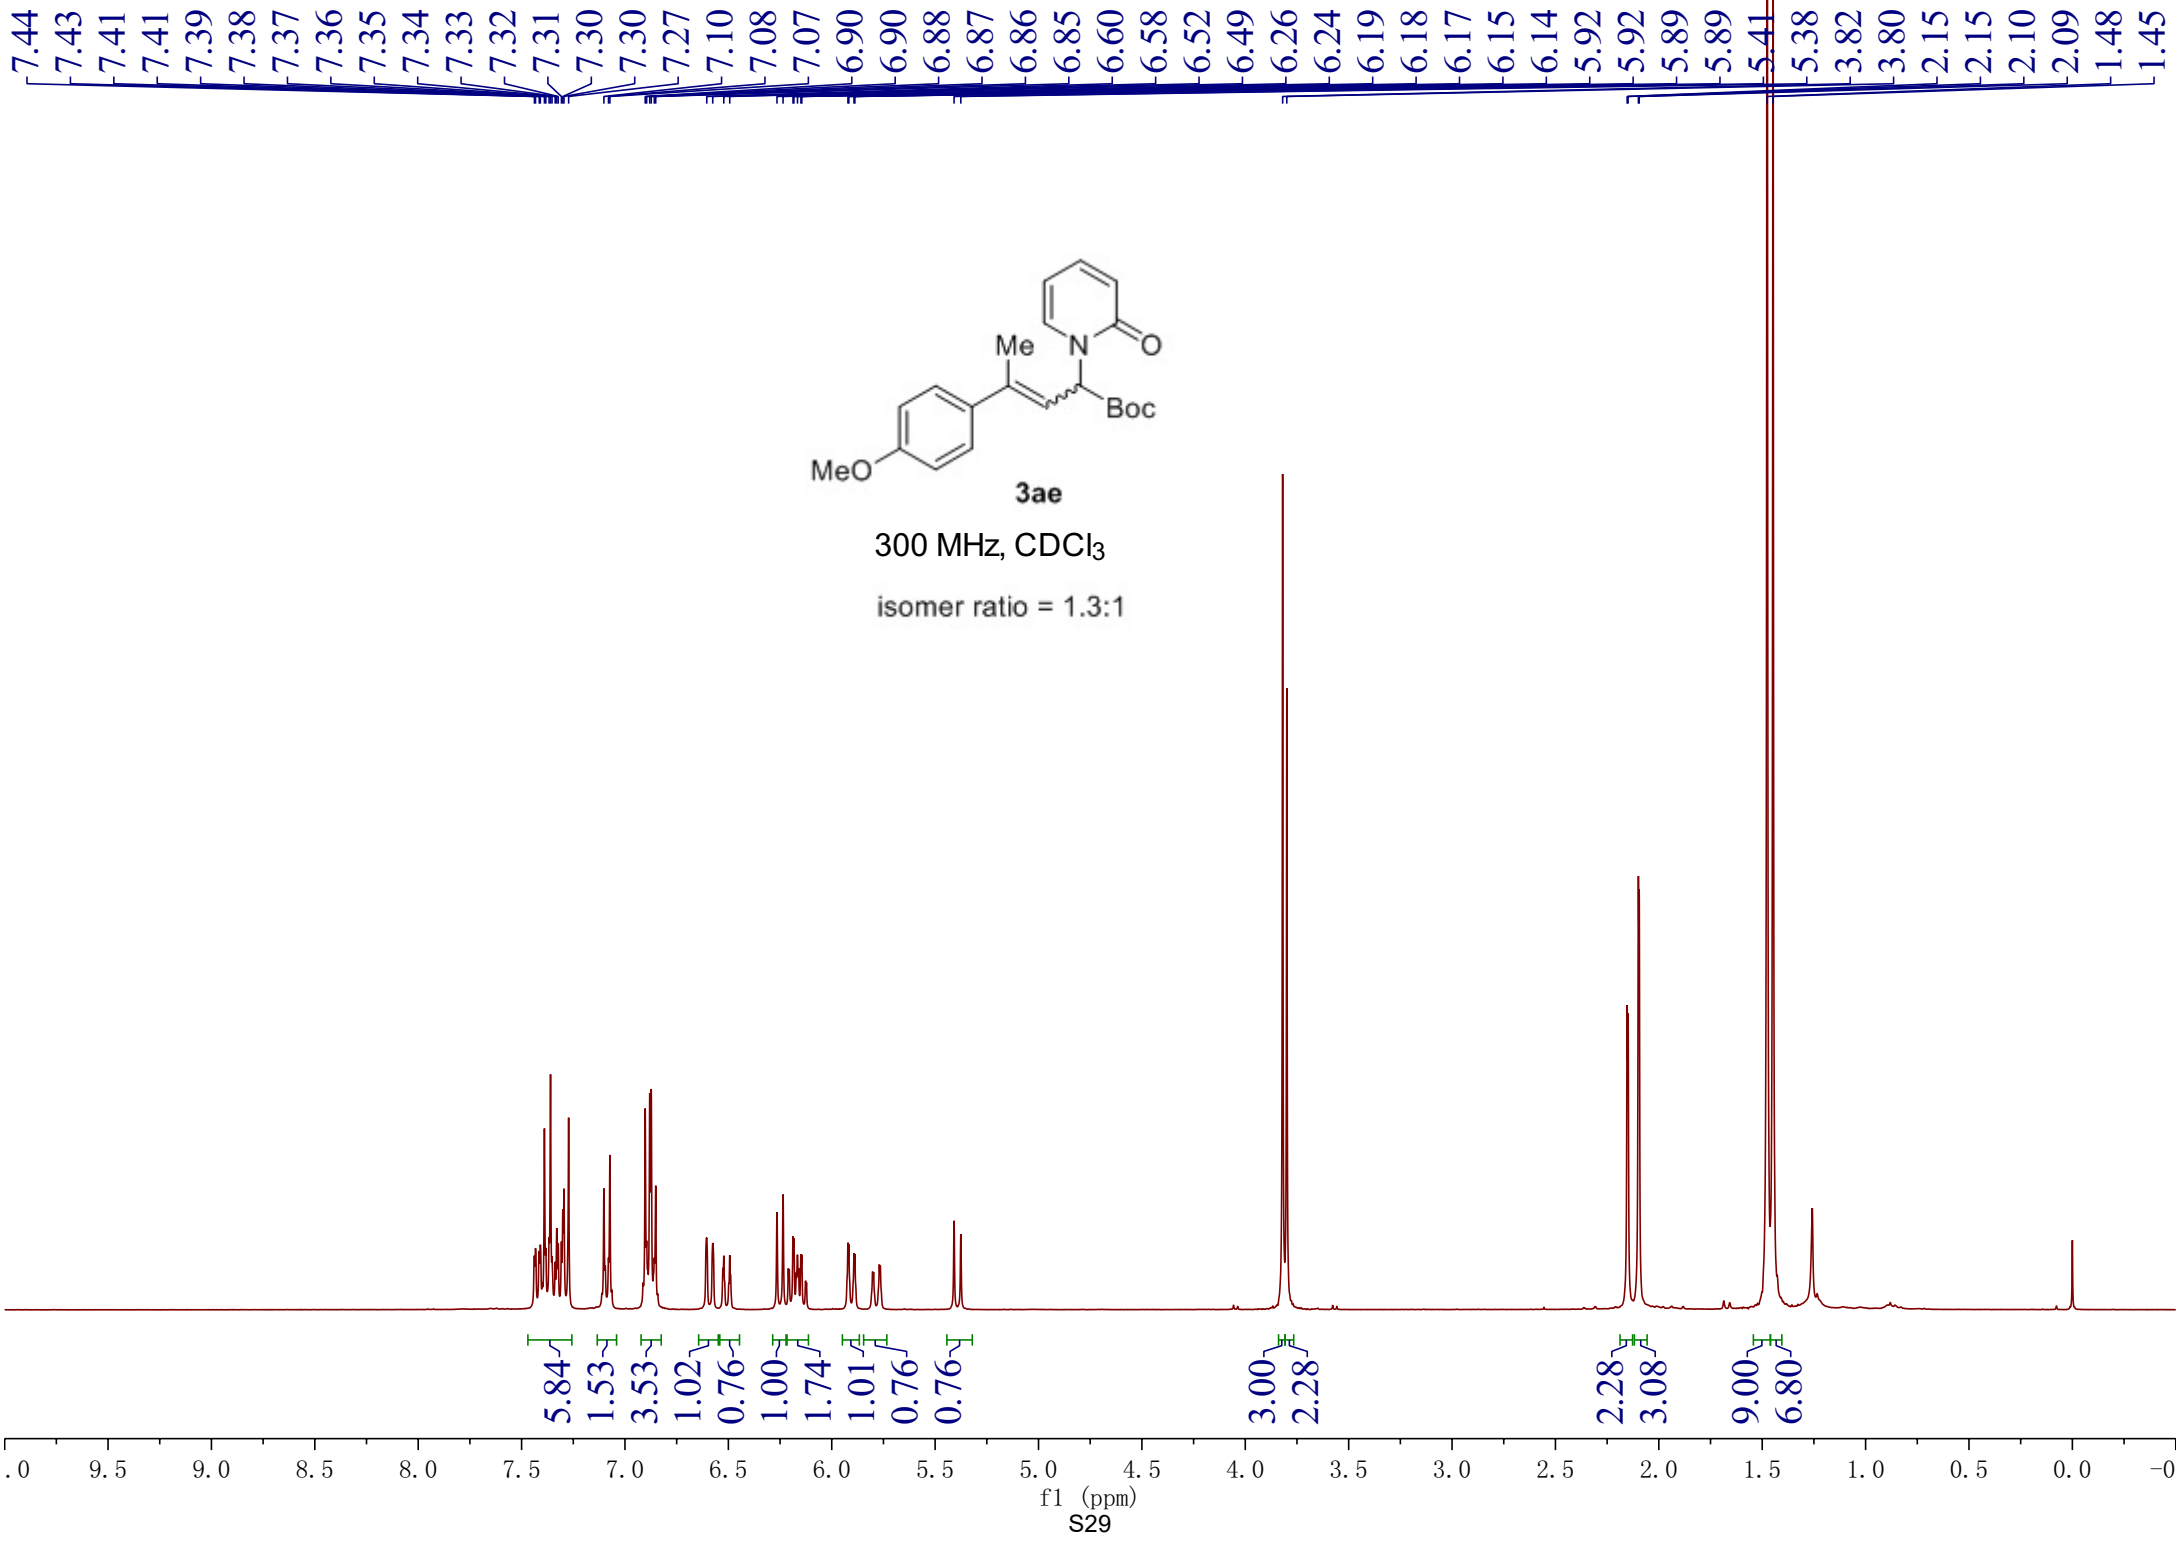

169.19  
168.73  
162.32  
162.09  
159.68  
159.16

139.47  
135.79  
135.52  
128.54  
127.18  
120.66  
120.40  
118.14  
117.76  
113.99  
113.79  
105.88  
105.53

82.73  
82.29

60.61  
57.08  
55.35  
55.25

27.97  
27.90  
26.27  
17.00

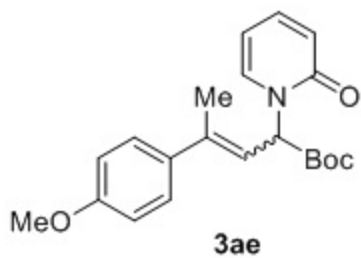

75 MHz, CDCl<sub>3</sub>

isomer ratio = 1.3:1

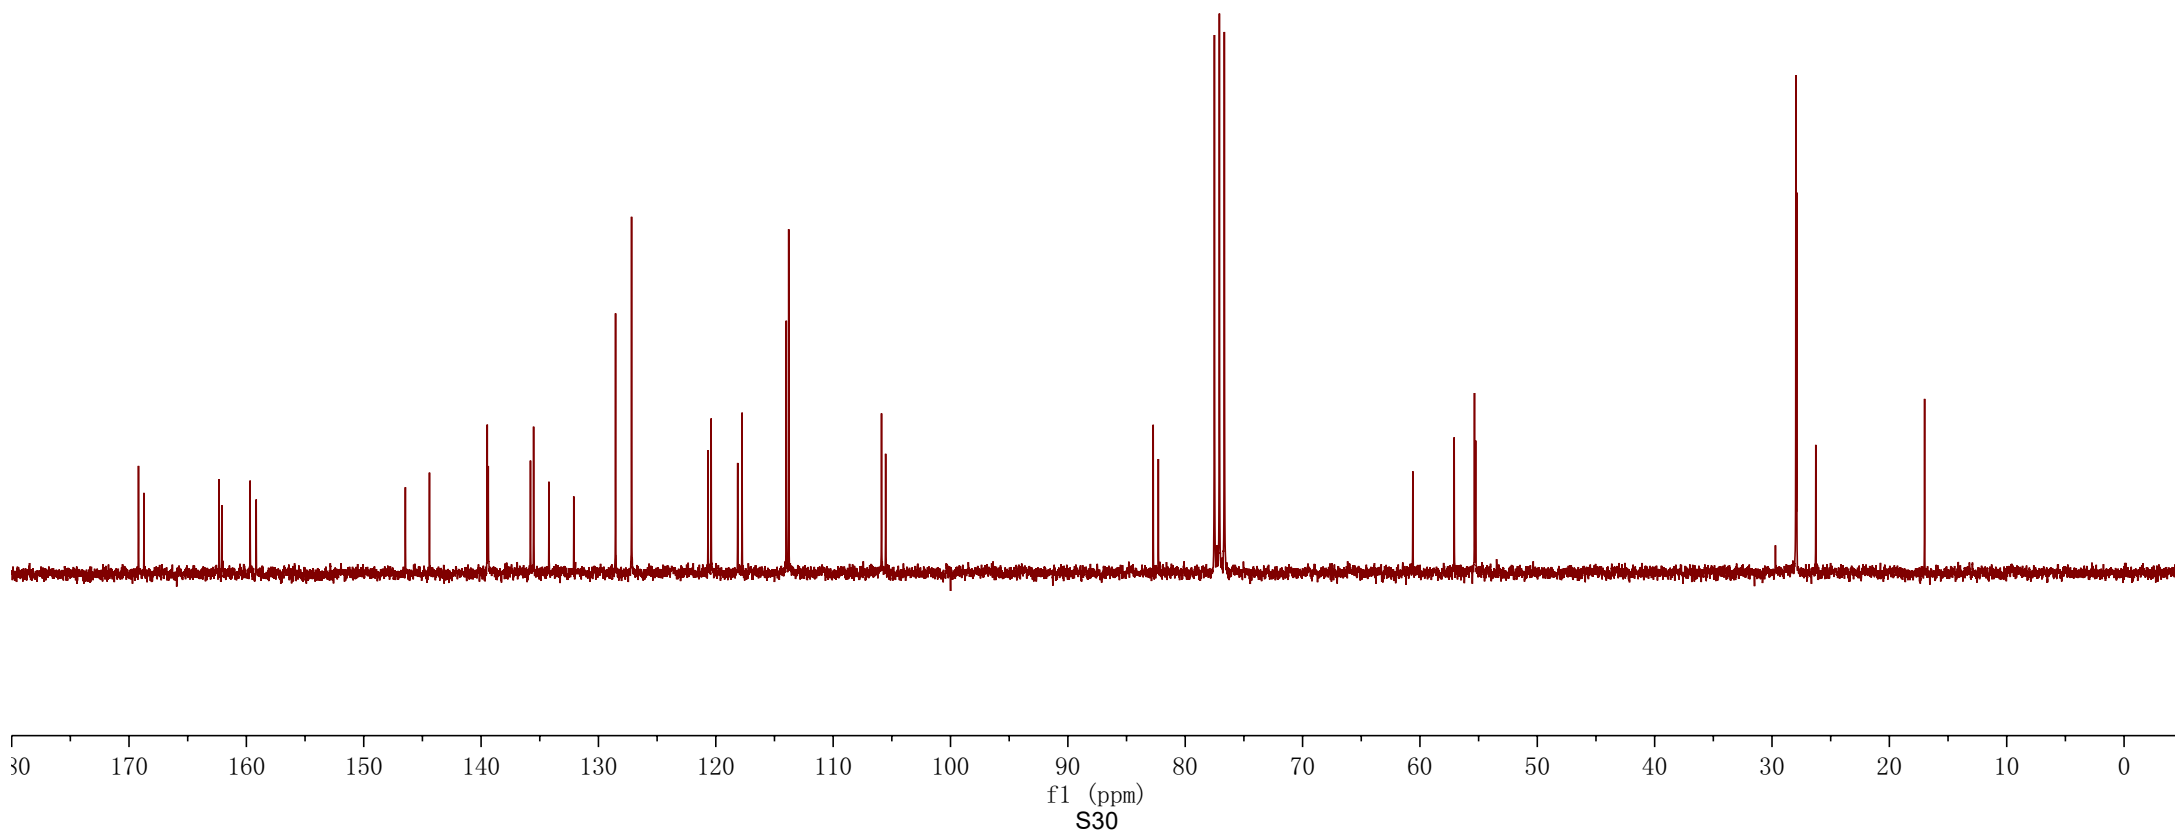



7.27  
7.27  
7.25  
7.21  
7.19  
7.11  
6.92  
6.90  
6.74  
6.71  
6.48  
6.45  
6.13  
6.11  
6.09  
6.04  
6.02  
6.00  
5.97  
4.94  
4.91  
4.79  
4.76

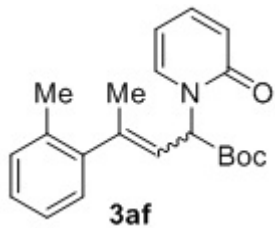

300 MHz, CDCl<sub>3</sub>

isomer ratio = 1.3:1

~2.31  
~2.06  
~1.95

1.44

—0.00

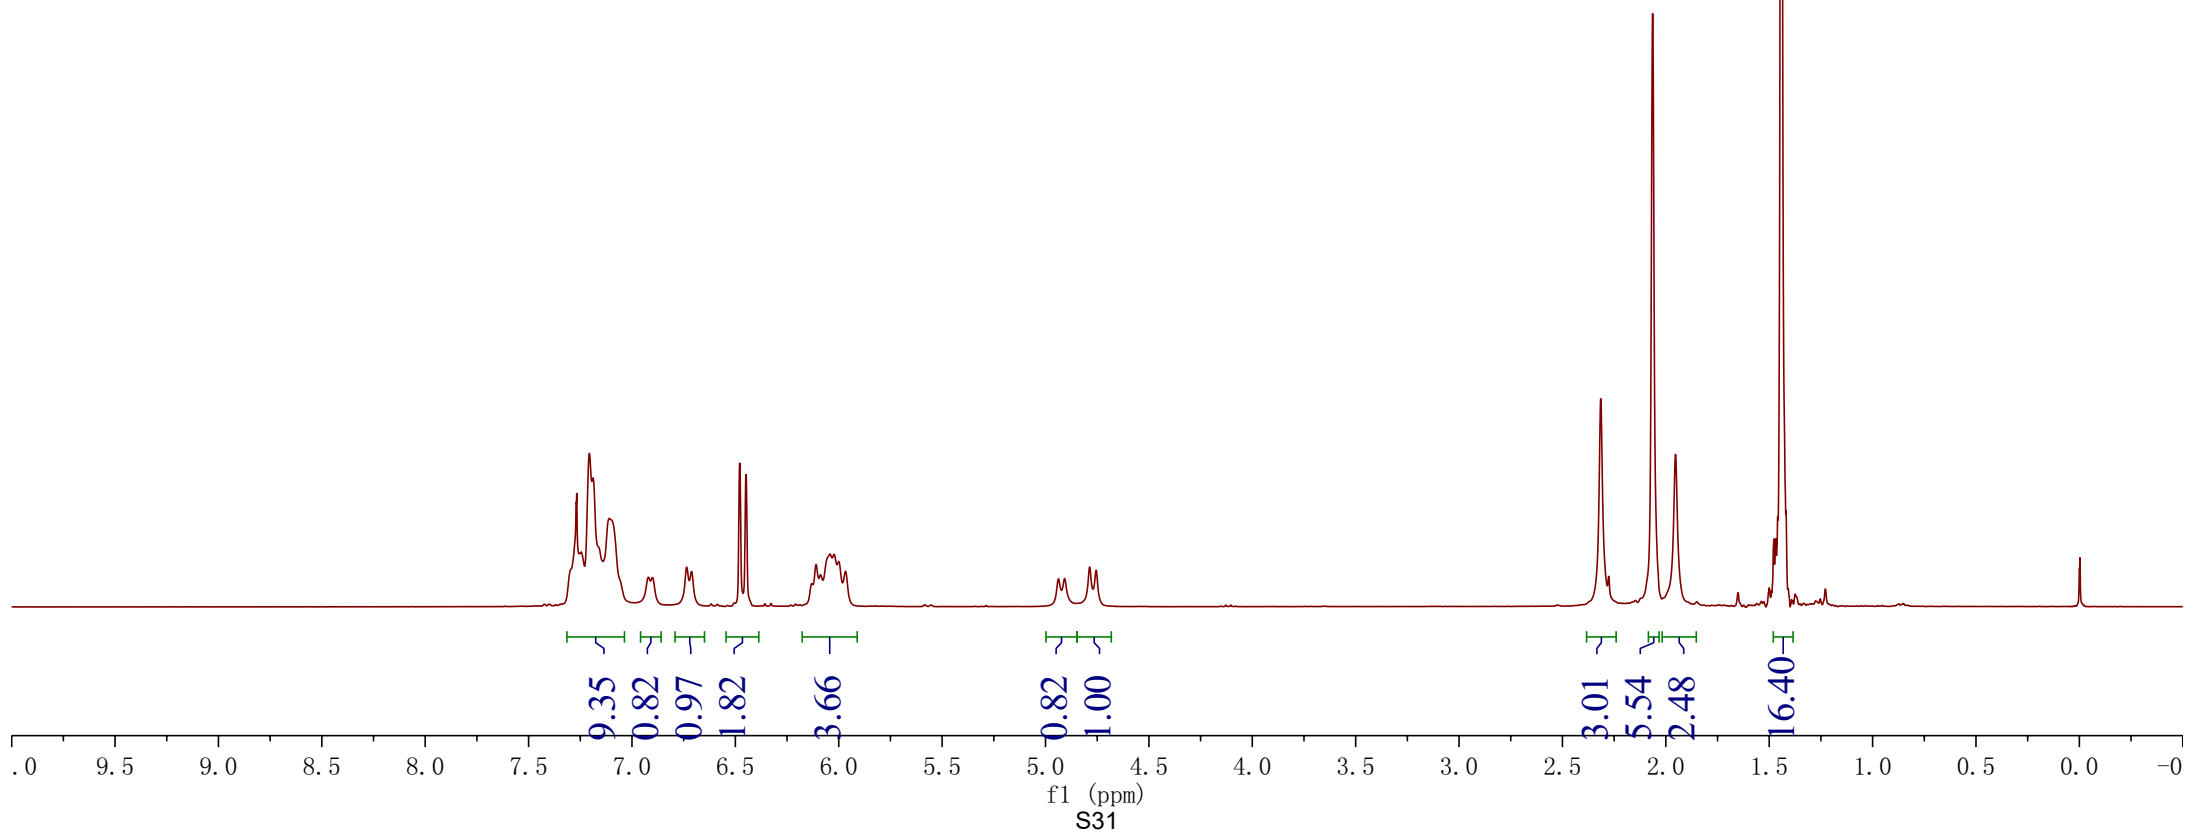

—168.35  
—162.02  
139.63  
139.40  
136.45  
136.18  
134.69  
130.48  
127.90  
127.73  
127.10  
126.15  
126.00  
120.73  
120.00  
119.79  
105.42  
105.30

—82.26

61.79  
61.53

27.89  
25.36  
19.02  
18.79

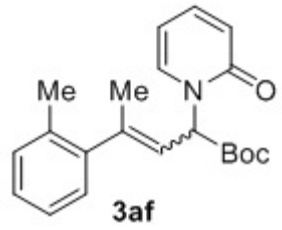

75 MHz, CDCl<sub>3</sub>  
isomer ratio = 1.3:1

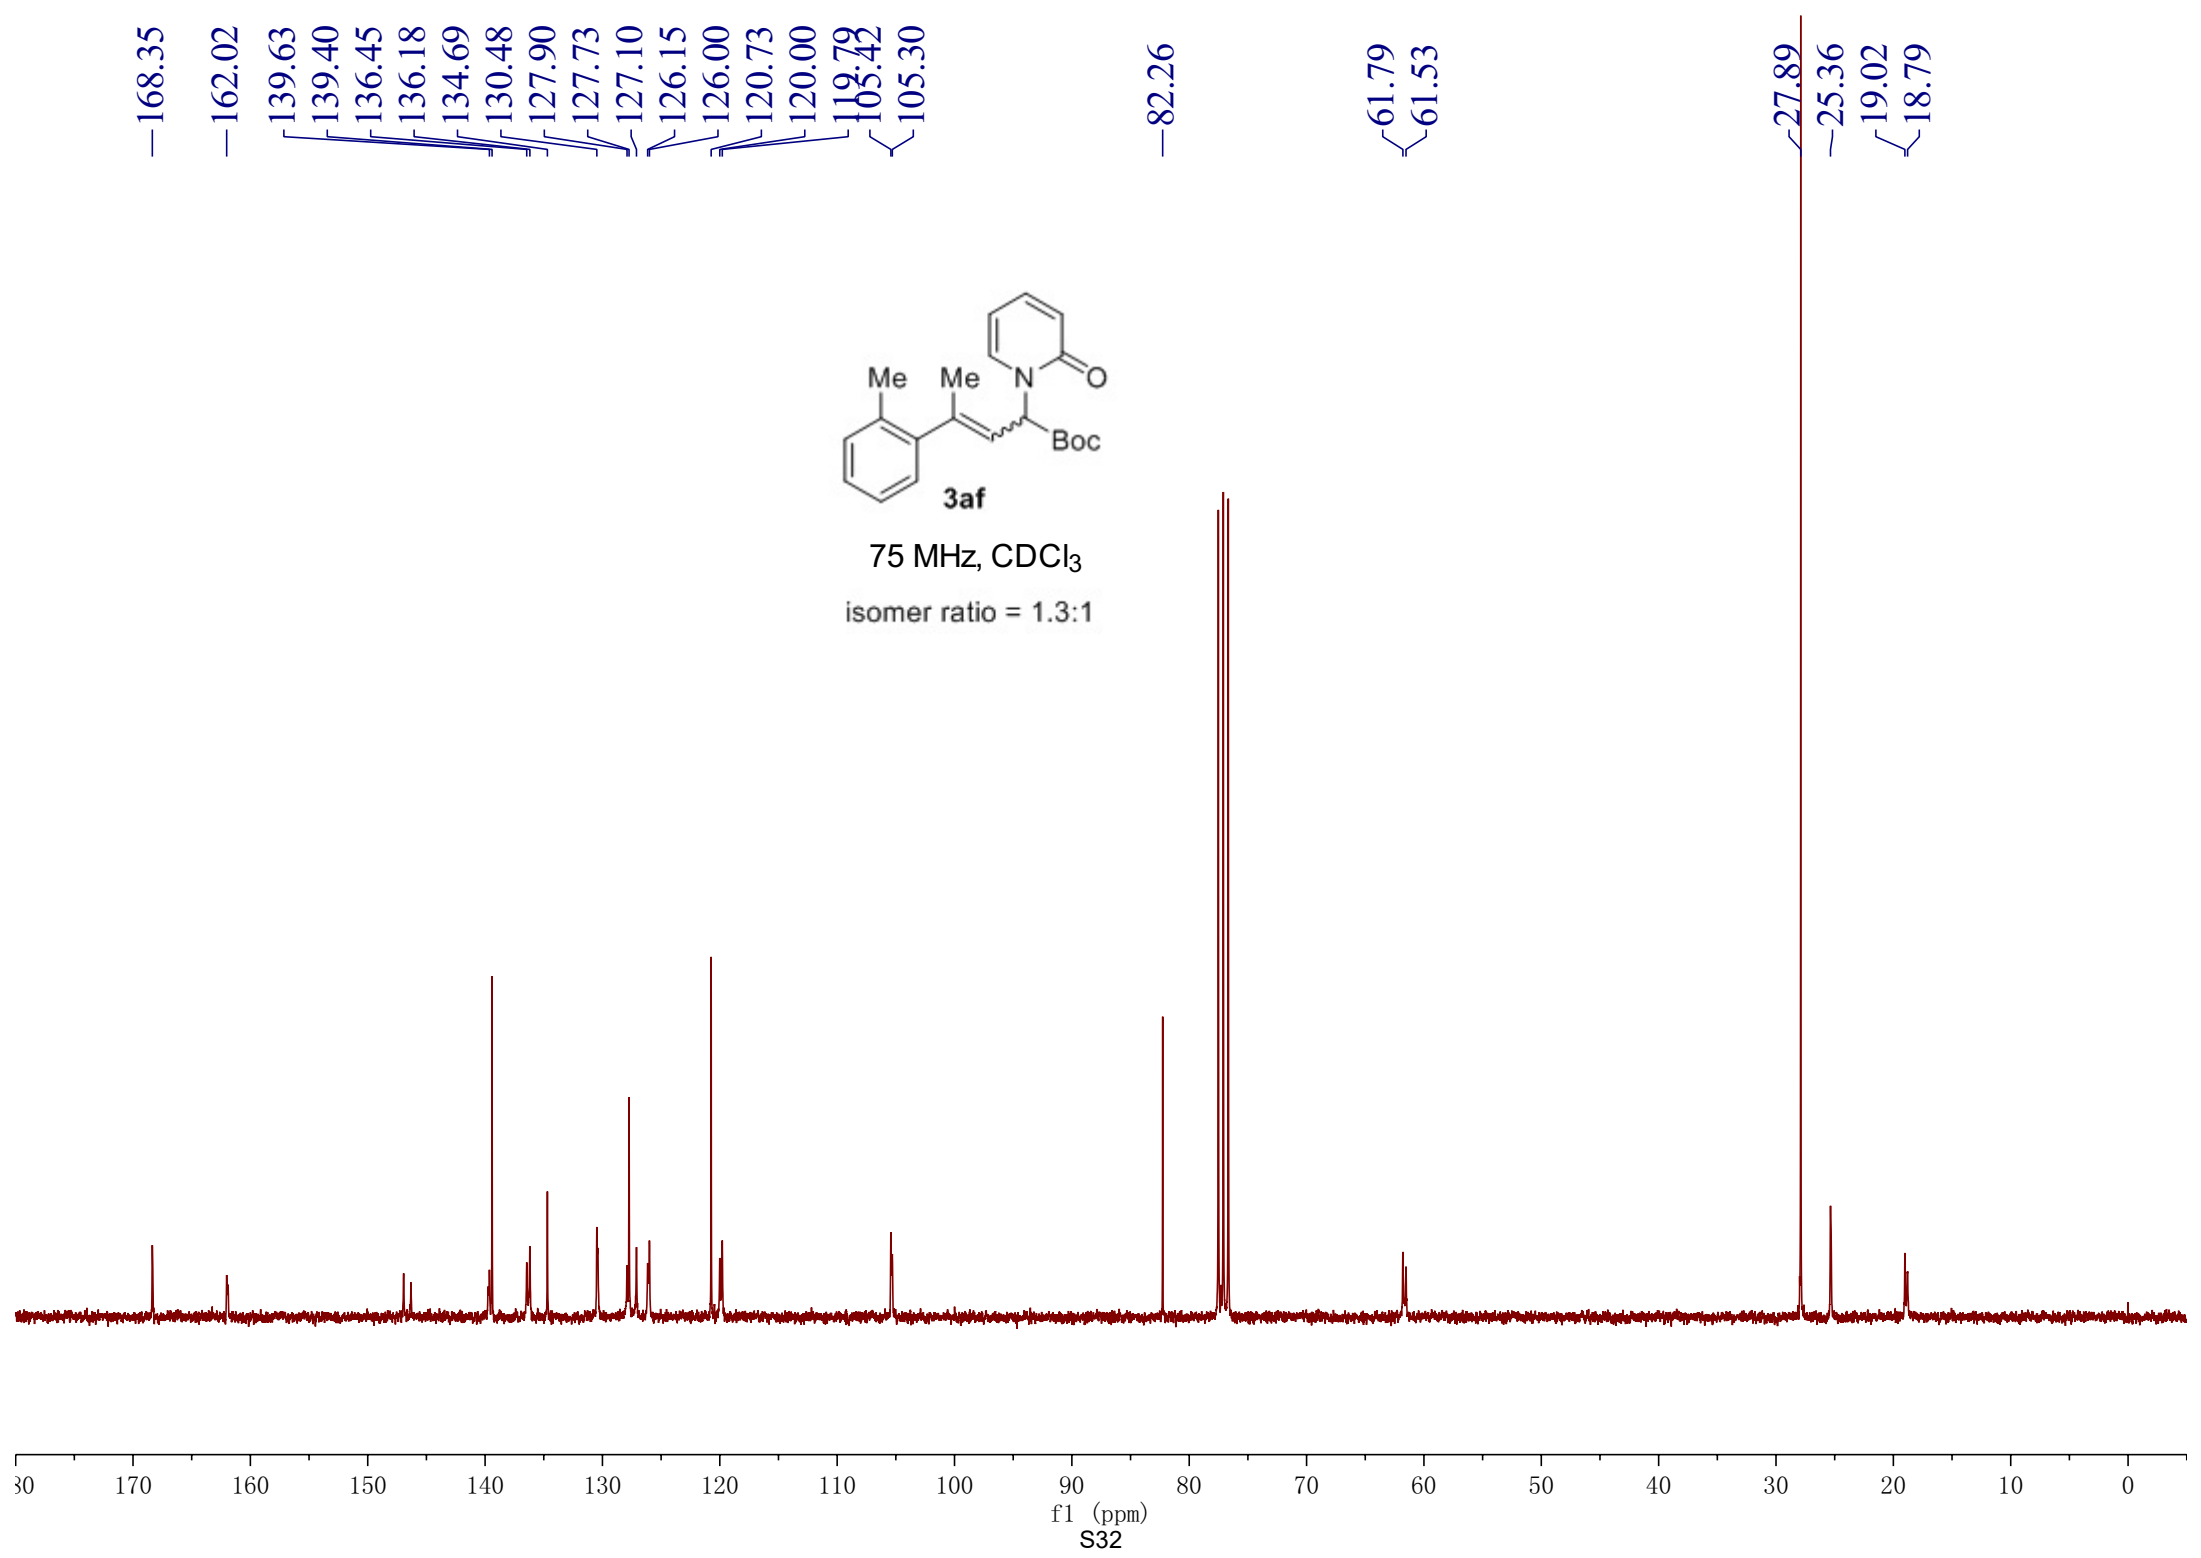

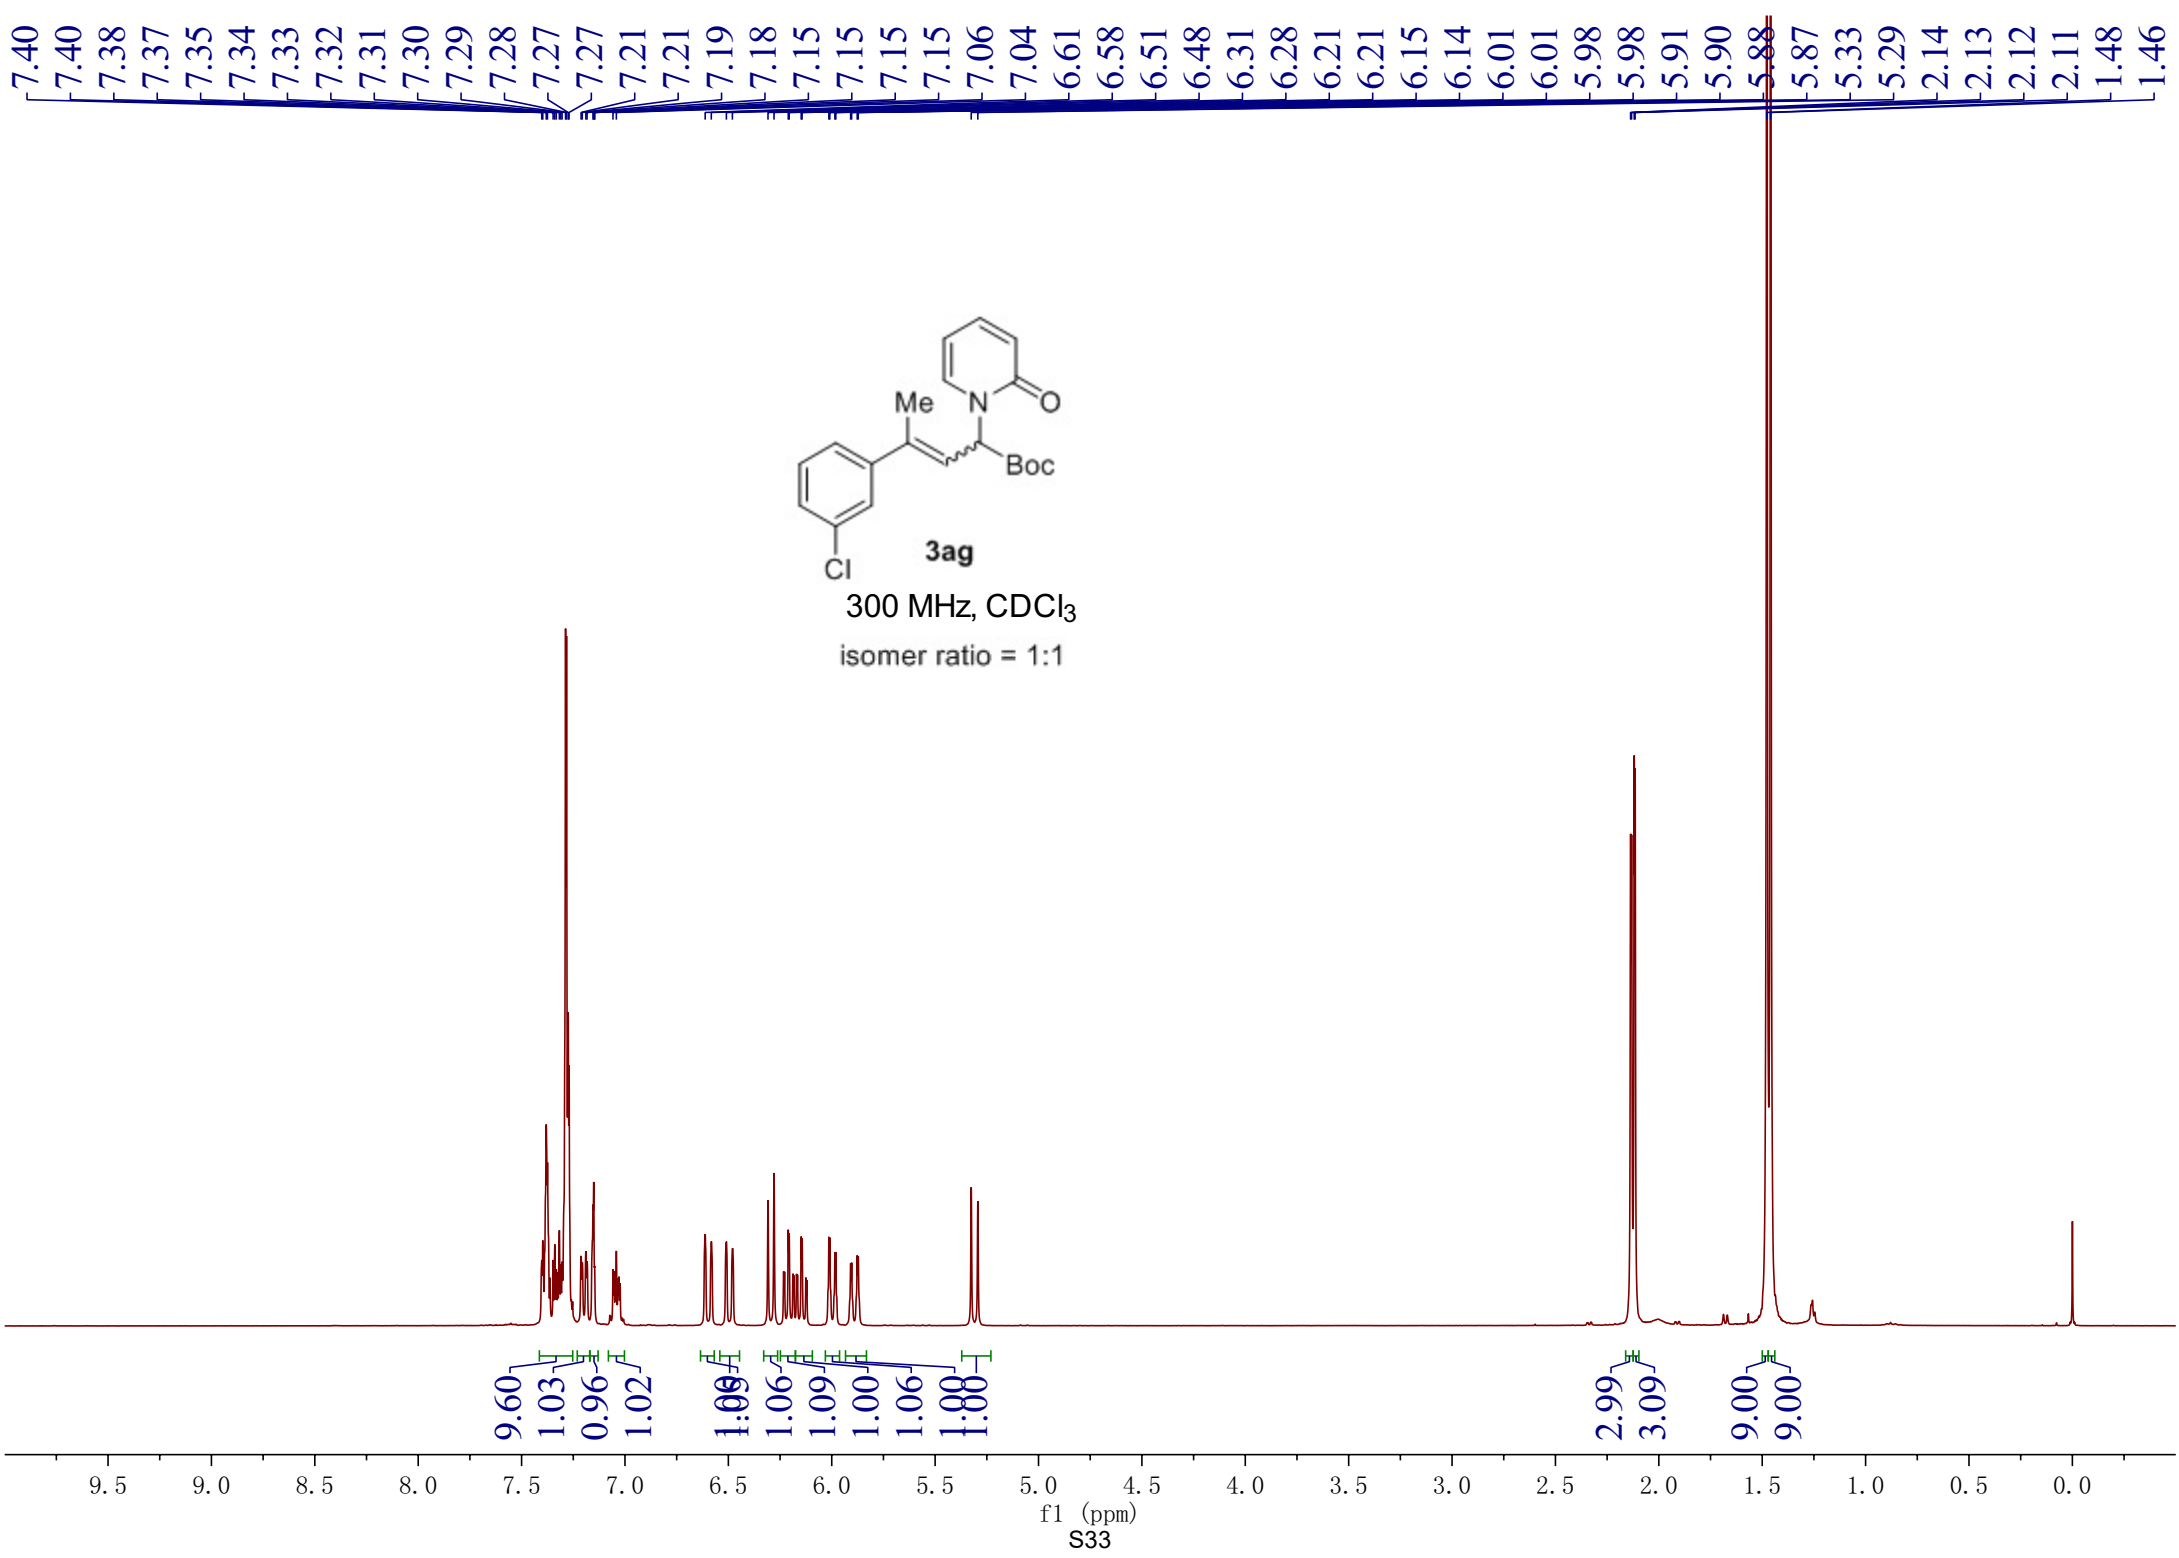

168.70  
168.27  
162.15  
161.90  
139.54  
135.52  
129.98  
129.71  
128.09  
127.92  
127.55  
126.24  
125.56  
124.24  
120.96  
120.76  
120.54  
106.09  
105.67

83.04  
82.65

60.30  
56.73

27.96  
27.90  
26.01

17.06

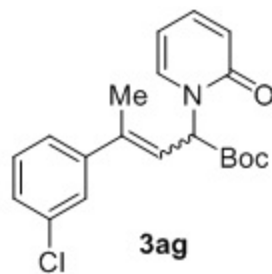

75 MHz, CDCl<sub>3</sub>

isomer ratio = 1:1

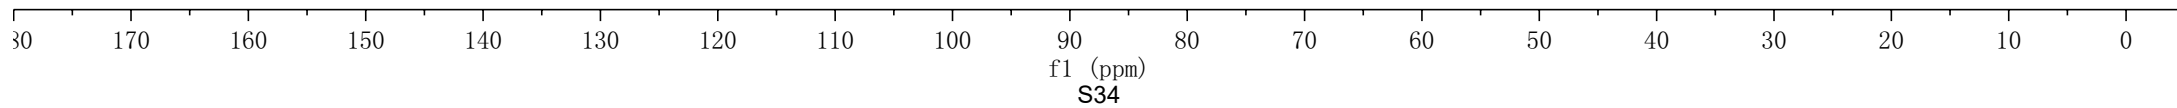

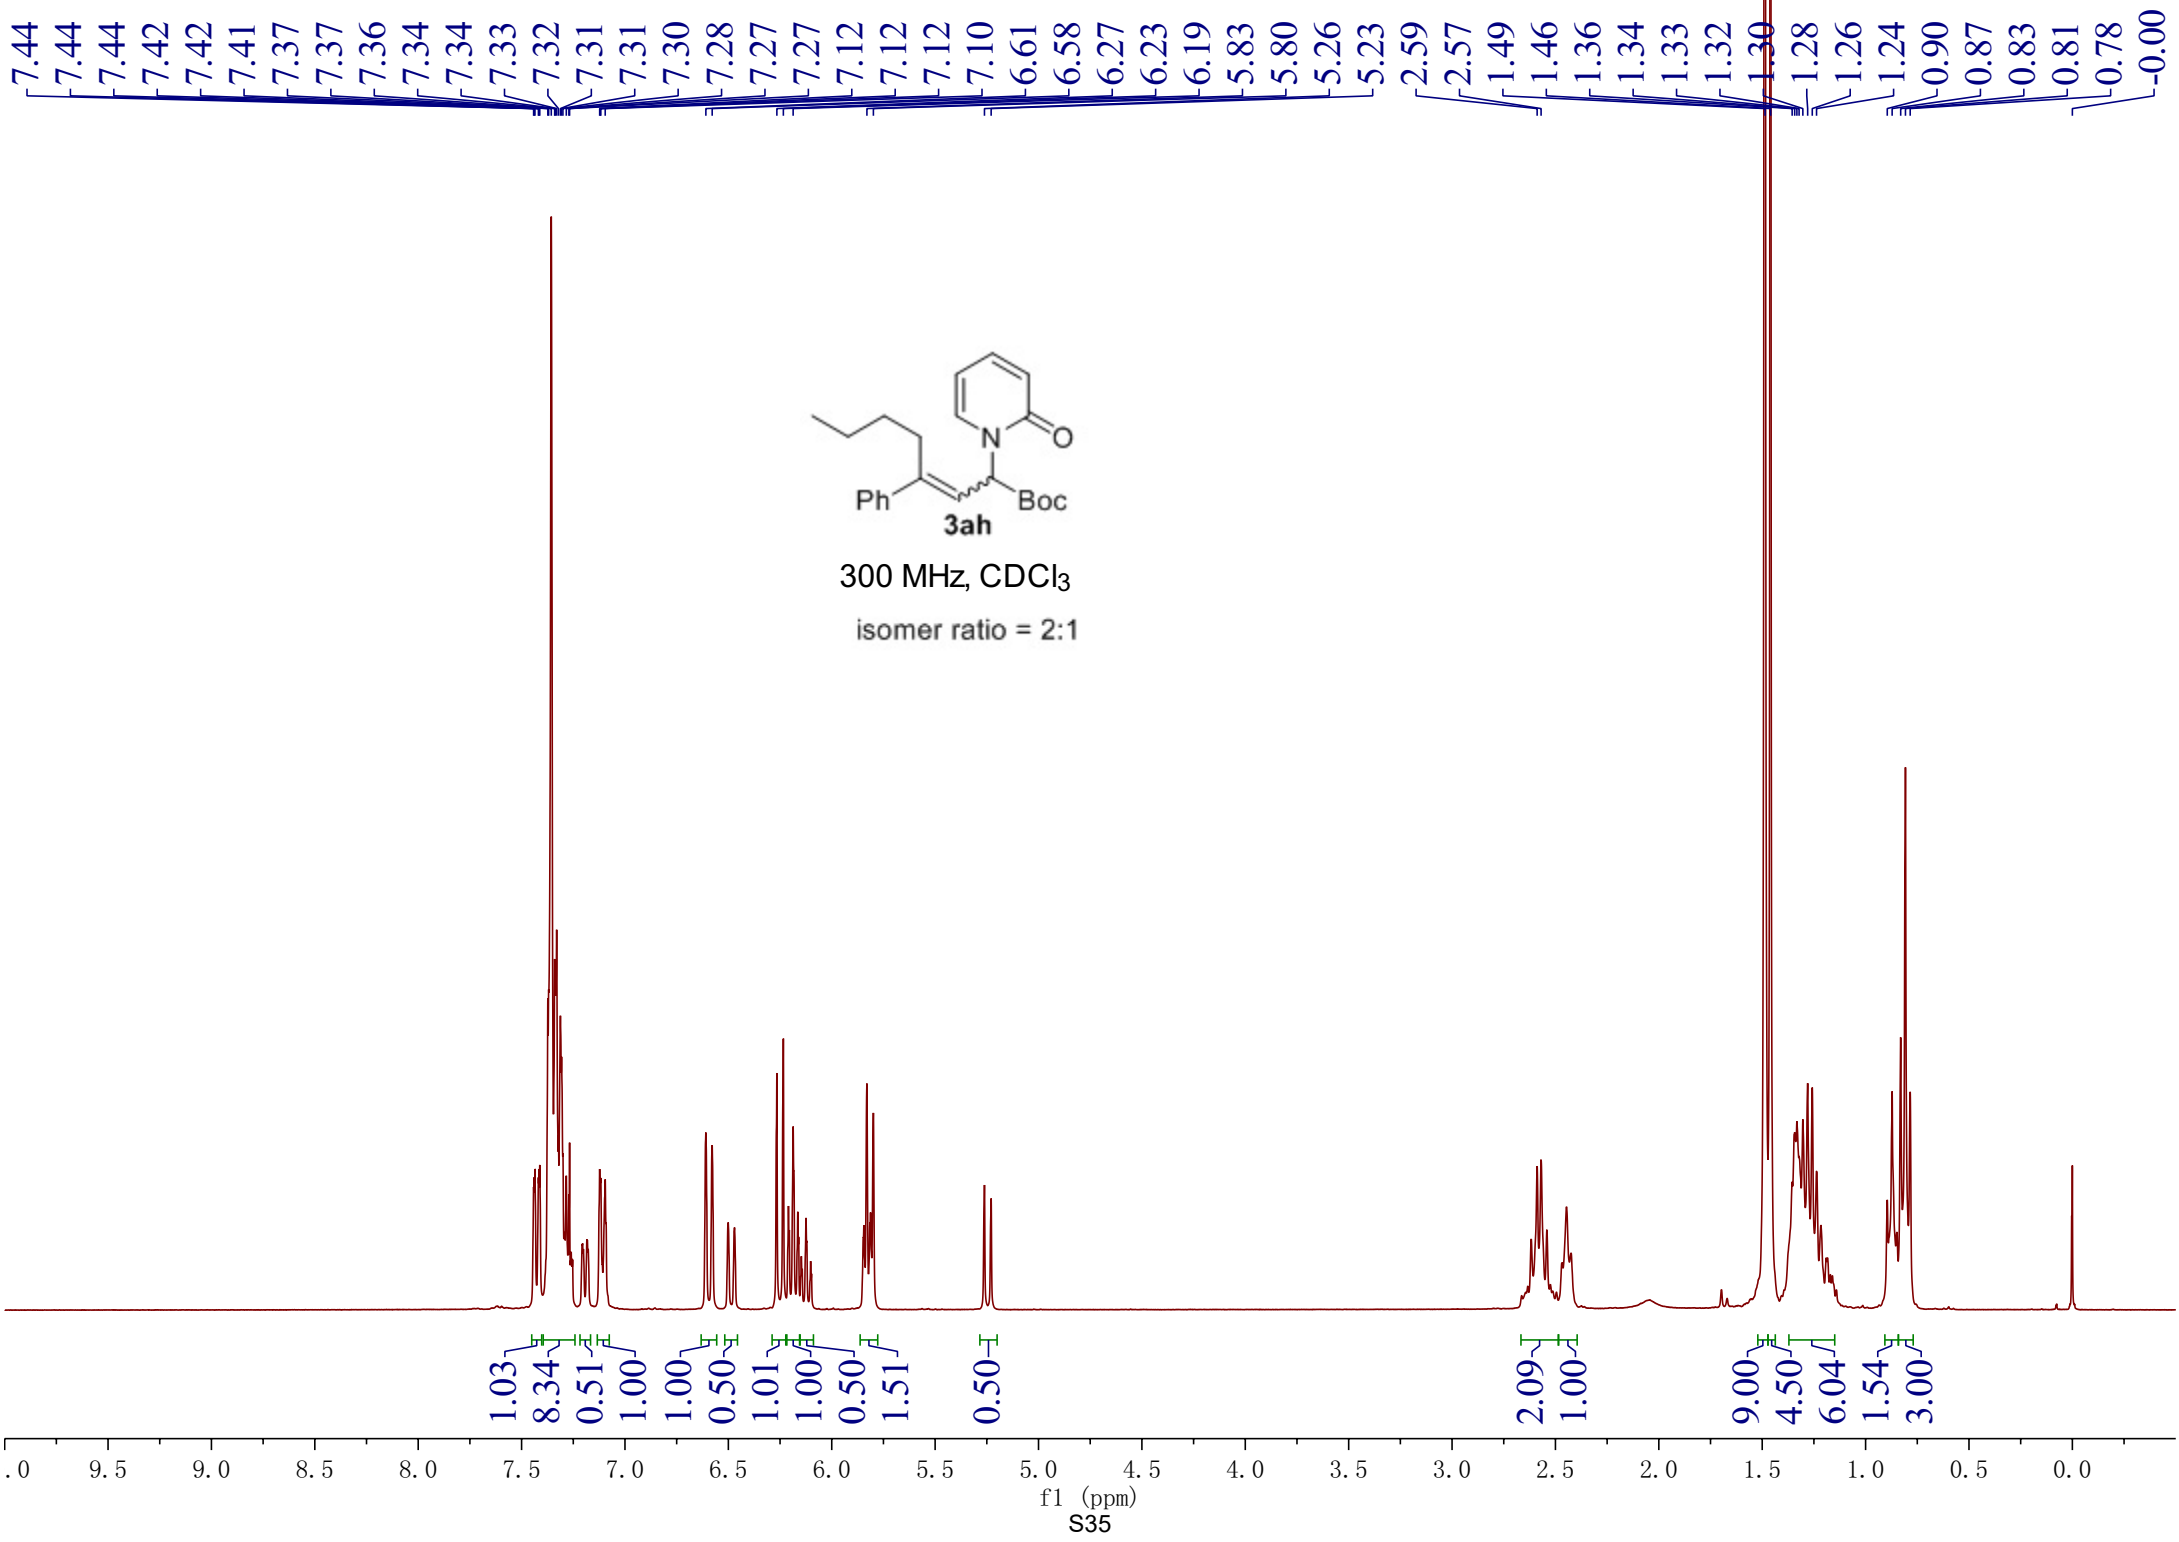

169.06  
168.60  
162.25  
162.02

151.04  
150.65

141.35  
139.47  
135.53

128.50  
128.49  
128.07  
127.72

126.66  
120.43  
119.49  
105.82

105.50

82.73  
82.25

60.74  
56.76

39.33

30.65  
30.46  
27.97  
27.90  
22.53  
13.90  
13.84

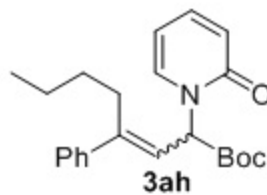

75 MHz, CDCl<sub>3</sub>

isomer ratio = 2:1

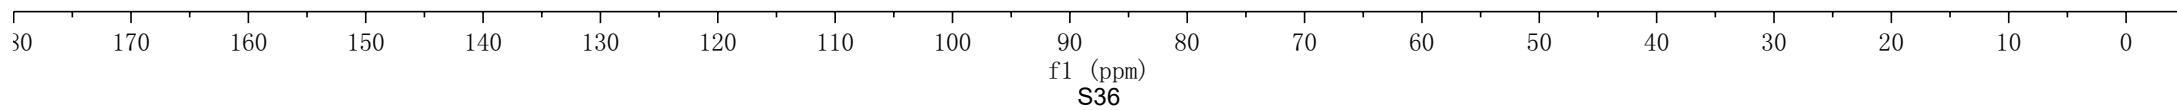

7.38  
7.38  
7.36  
7.35  
7.34  
7.33  
7.32  
7.31  
7.30  
7.29  
7.28  
6.58  
6.55  
6.19  
6.19  
6.17  
6.17  
6.15  
6.14  
6.03  
6.00  
5.34  
5.31  
2.45  
2.03  
2.03  
1.99  
1.78  
1.75  
1.72  
1.67  
1.65  
1.59  
1.56  
1.45  
1.35  
1.33  
1.29  
1.28  
1.27  
1.25  
1.23  
1.22  
1.21  
1.20  
1.19  
1.18  
1.17  
1.16  
-0.00

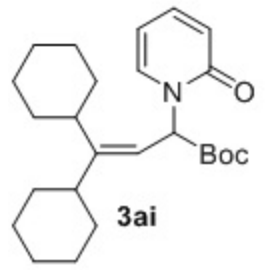

300 MHz, CDCl<sub>3</sub>

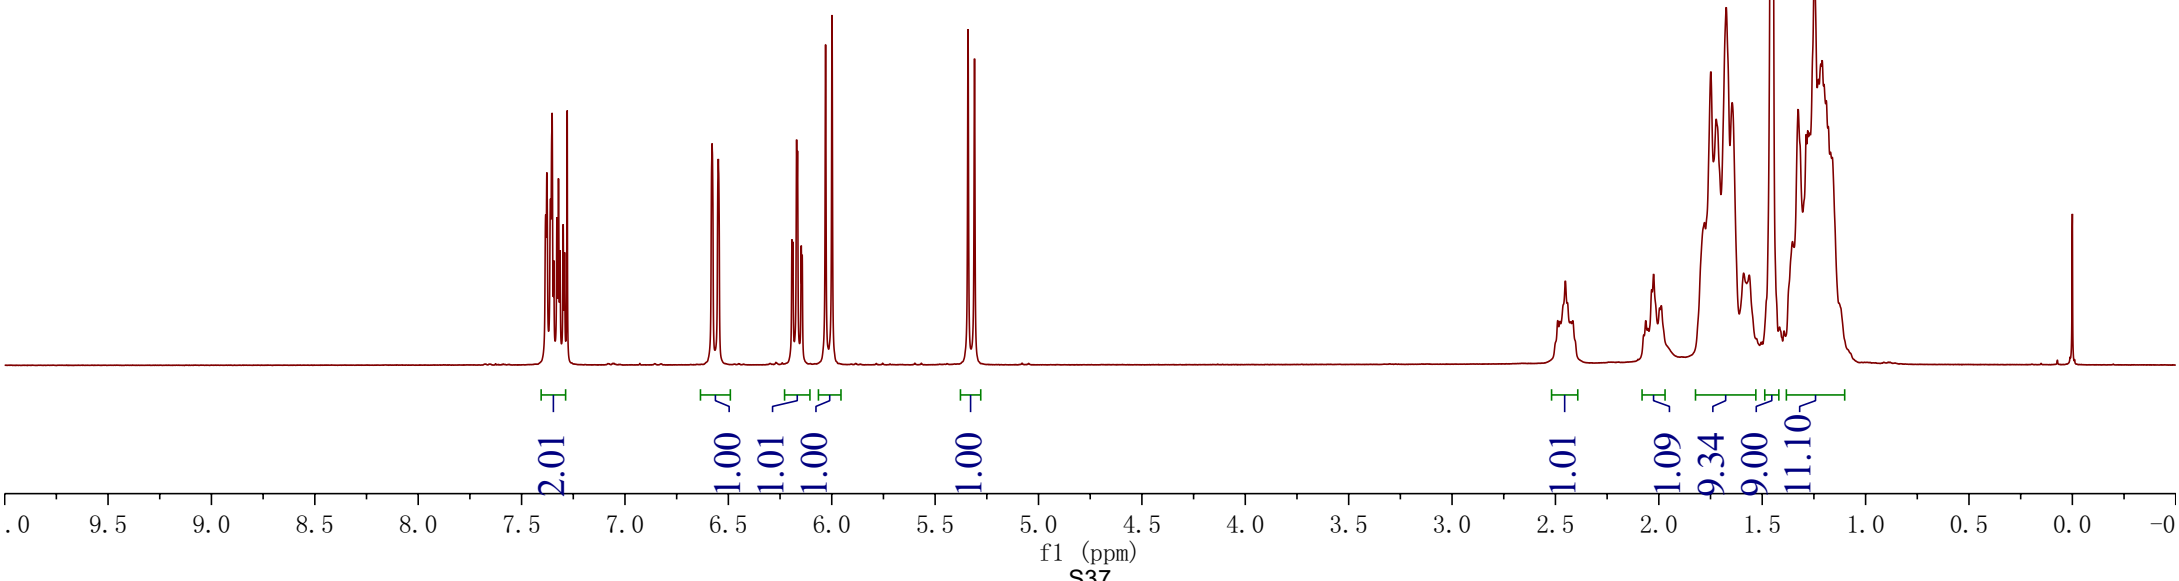

169.68  
162.45  
161.48  
139.34  
135.11  
120.21  
114.38  
105.53  
82.07  
56.40  
41.57  
40.25  
34.94  
34.82  
30.40  
30.14  
27.90  
26.92  
26.11  
26.06  
26.04  
25.91

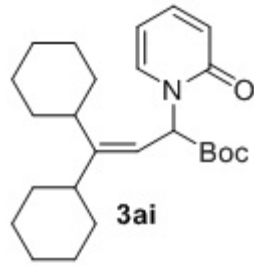

75 MHz, CDCl<sub>3</sub>

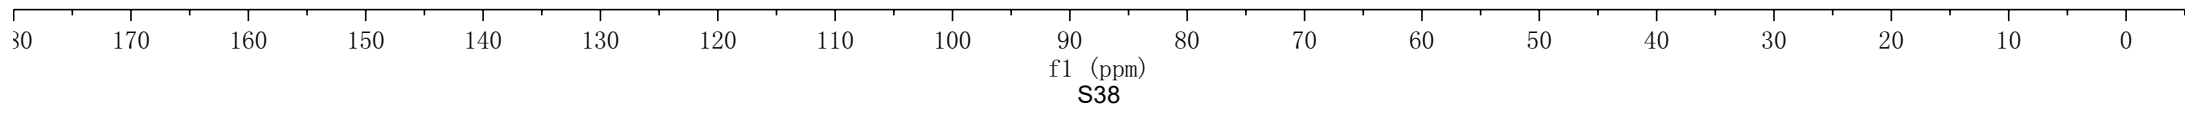



7.39  
7.38  
7.37  
7.37  
7.32  
7.32  
7.31  
7.30  
7.29  
7.28  
7.28

6.55  
6.53  
6.16  
6.16  
6.00  
5.98  
5.37  
5.35

2.12  
2.10  
2.08  
2.07  
2.05  
2.03

1.44  
1.27  
1.24  
1.20  
0.89  
0.87  
0.86  
0.85  
0.84  
0.82

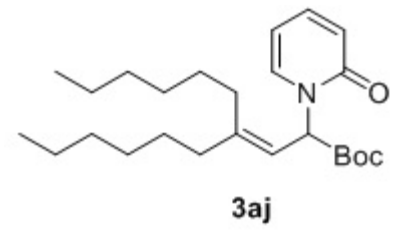

300 MHz, CDCl<sub>3</sub>

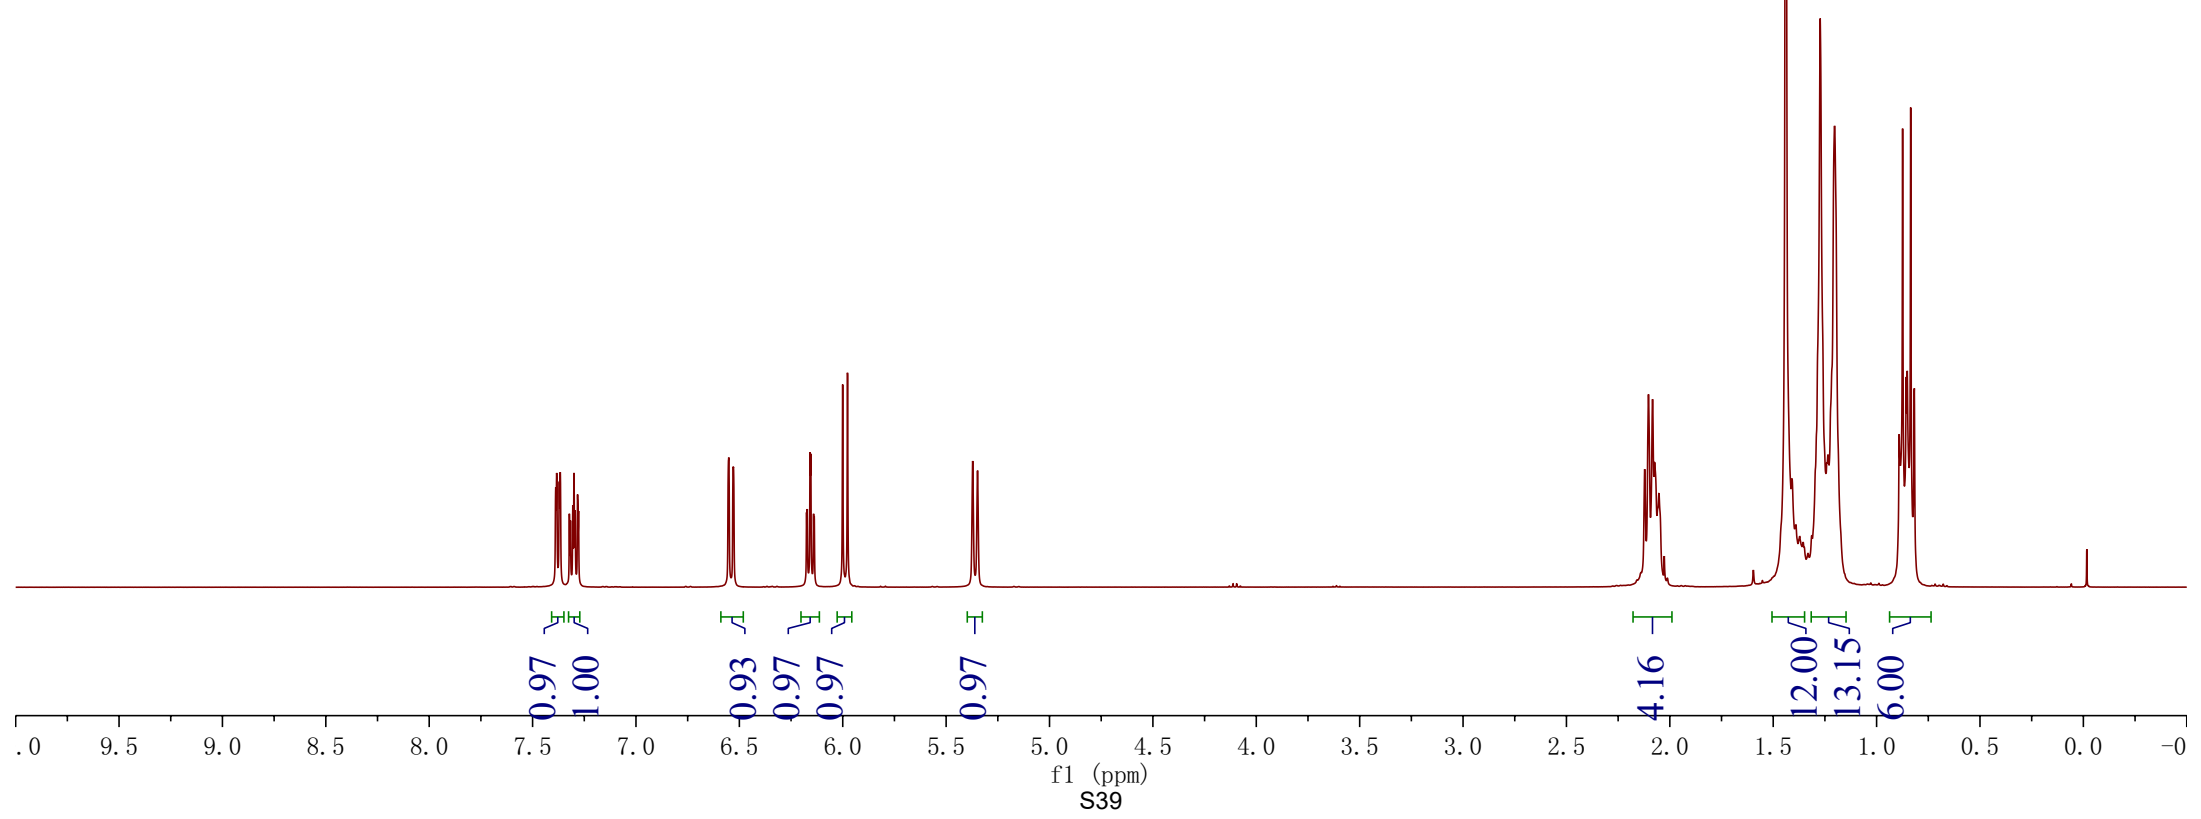

—169.55 —162.30 —151.87 —139.28 —135.36 —120.25 —116.19 —105.46 —82.20 —56.57 31.70 31.67 29.20 28.90 28.06 27.88 27.75 22.63 22.52 14.06 14.04

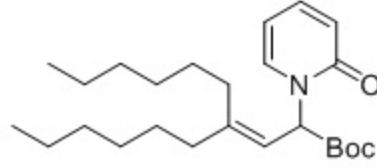

3aj

75 MHz, CDCl<sub>3</sub>

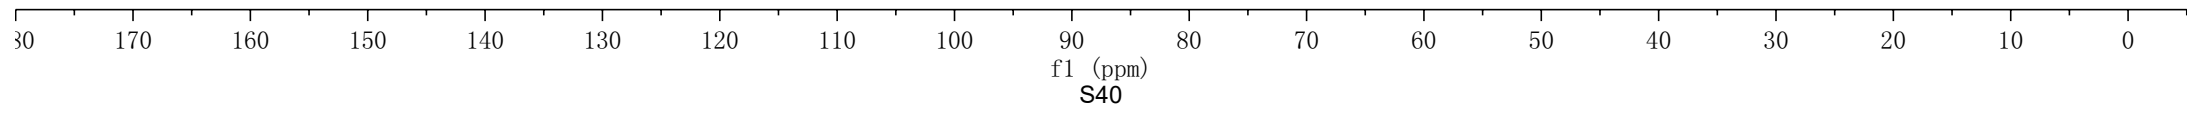

7.49  
7.49  
7.47  
7.47  
7.45  
7.34  
7.33  
7.32  
7.31  
7.31  
7.27  
7.23  
7.23  
7.21  
7.20  
7.19  
7.18  
7.16  
7.16  
7.14  
7.13  
6.60  
6.57  
6.29  
6.26  
6.21  
6.19  
6.19  
6.18  
6.17  
6.16  
6.16  
5.94  
5.91  
5.64  
5.61  
2.85  
2.83  
2.80  
2.78  
2.58  
2.56  
2.55  
1.99  
1.97  
1.96  
1.95  
1.48  
1.45  
-0.00

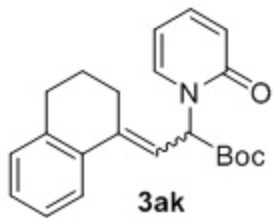

300 MHz, CDCl<sub>3</sub>

isomer ratio = 1.25:1

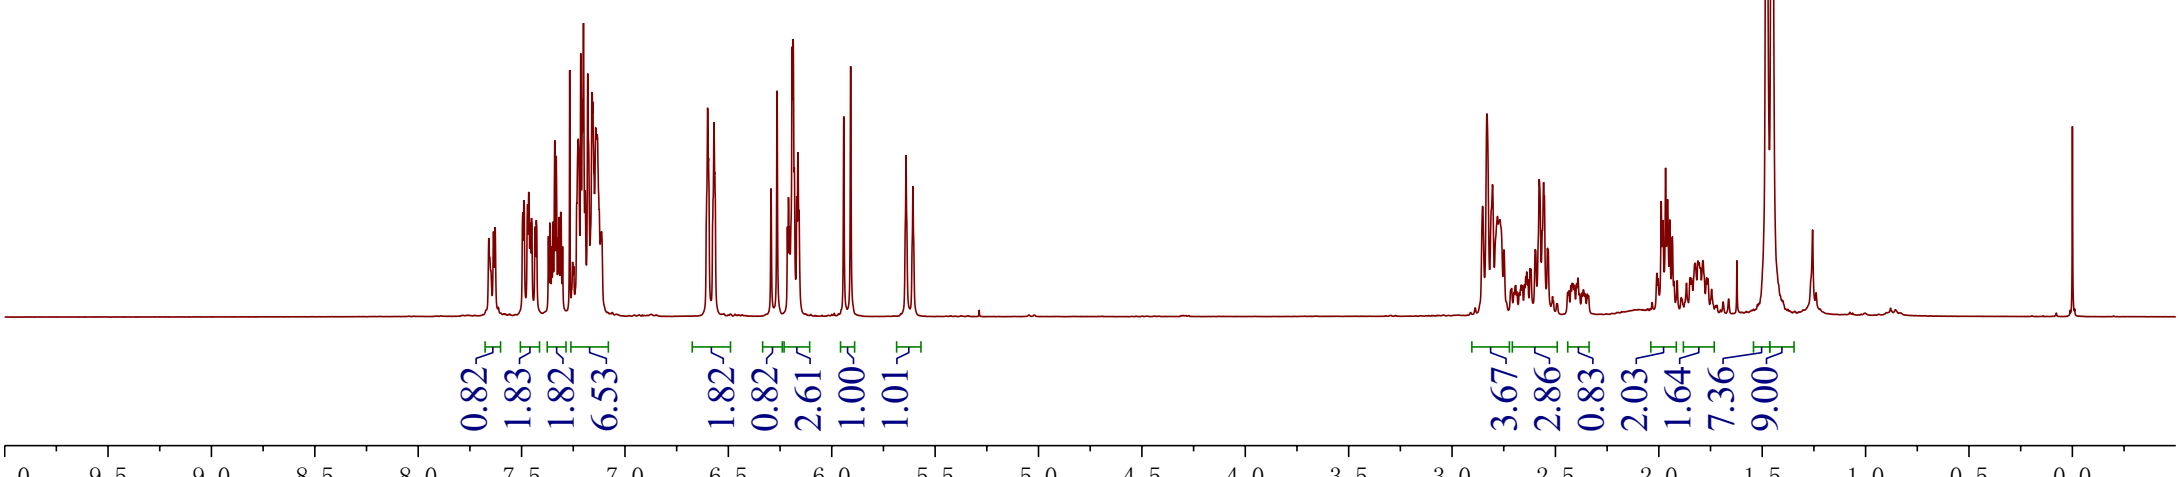

f1 (ppm)  
S41

169.32  
168.97  
162.36  
162.34

139.55  
135.31  
129.18  
128.76  
128.61  
127.27  
126.27  
125.95  
124.26  
120.67  
120.36  
115.36  
115.09  
105.99  
105.74

82.82  
82.43

59.92  
56.58

34.67  
30.18  
29.29  
27.98  
27.93  
27.21  
23.91  
22.71

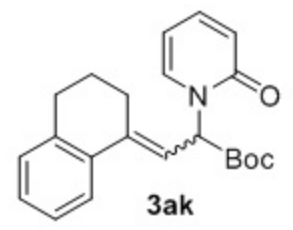

75 MHz, CDCl<sub>3</sub>  
isomer ratio = 1.25:1

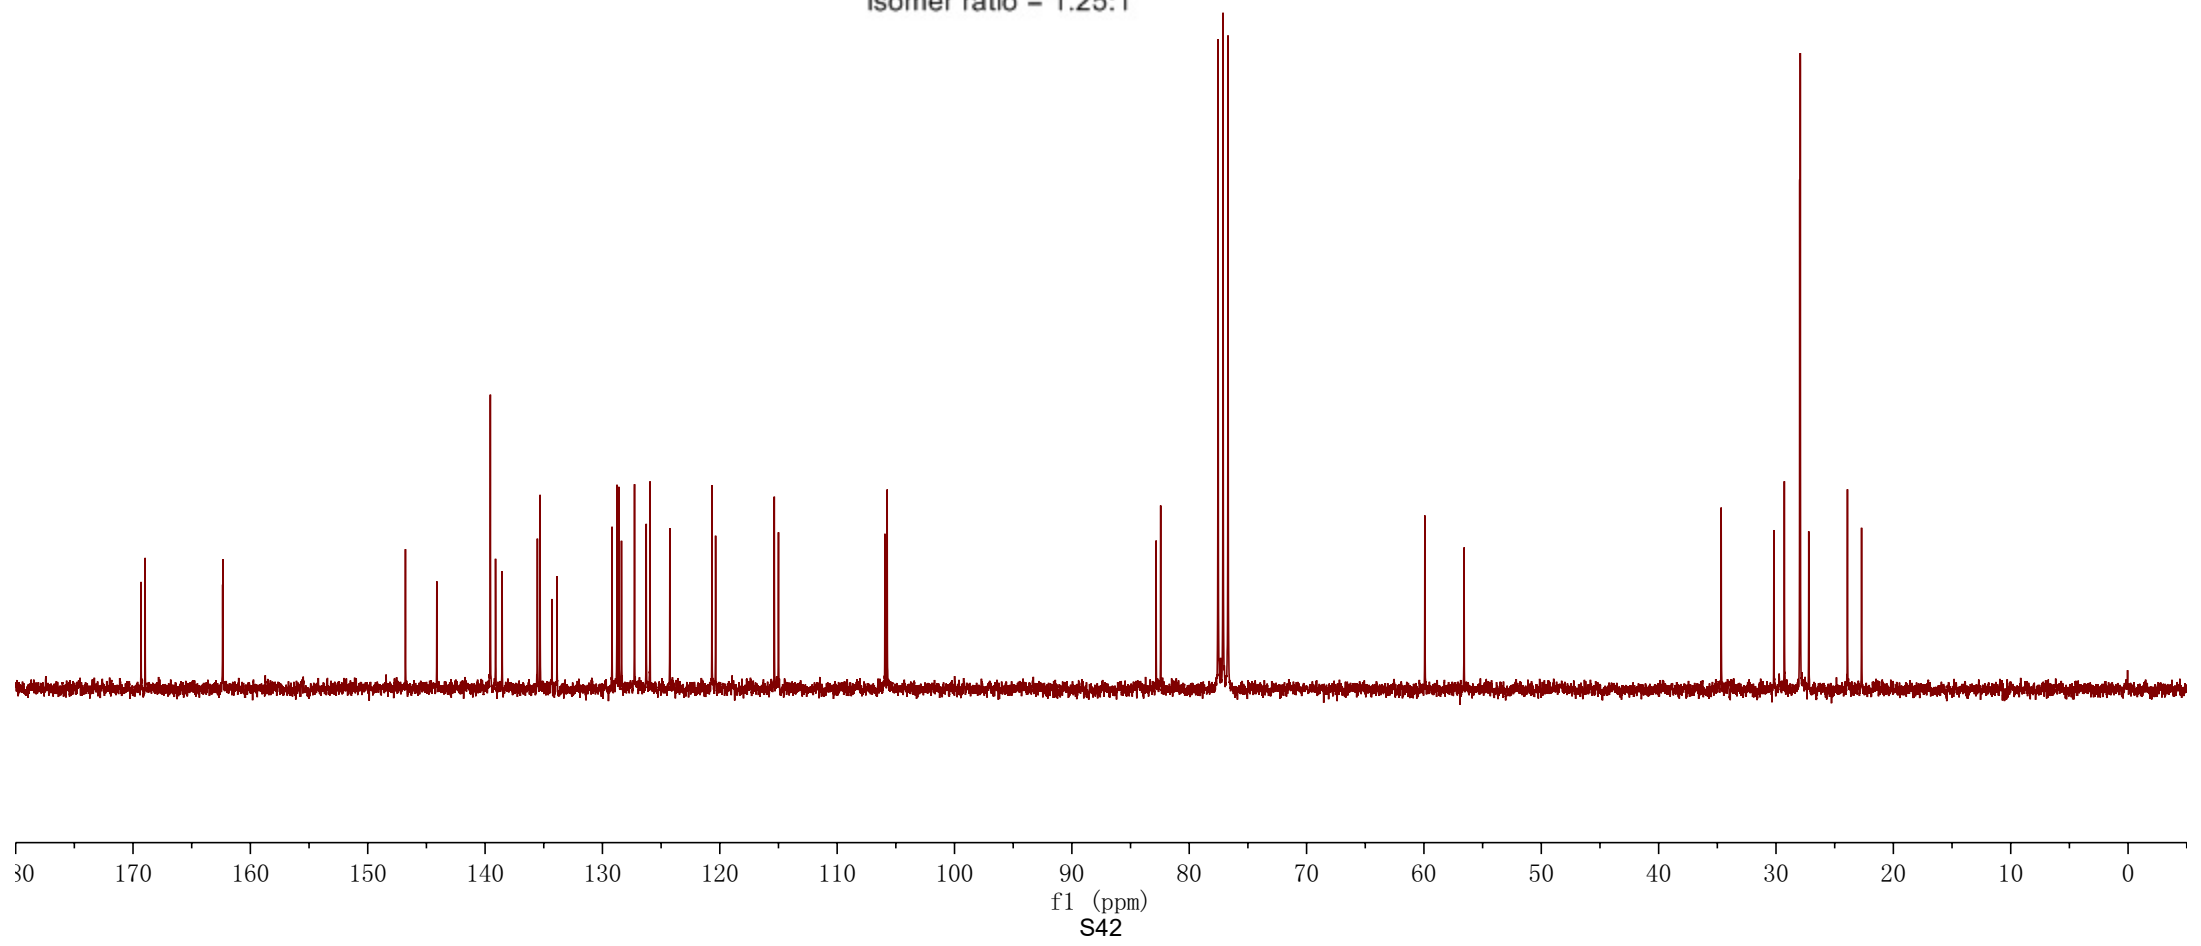

7.41  
7.40  
7.38  
7.38  
7.36  
7.35  
7.33  
7.33  
7.32  
7.30  
7.30  
7.28  
6.58  
6.55  
6.22  
6.22  
6.20  
6.19  
6.18  
6.17  
6.14  
6.11  
5.47  
5.45  
3.99  
3.96  
3.94  
2.44  
2.41  
2.39  
2.37  
2.35  
2.32  
2.31  
2.30  
2.28  
1.76  
1.74  
1.73  
1.72  
1.69  
1.68  
1.66  
1.65  
1.62  
1.60  
1.59  
1.57  
1.45  
-0.00

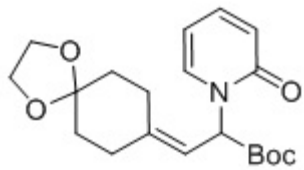

**3al**

300 MHz, CDCl<sub>3</sub>

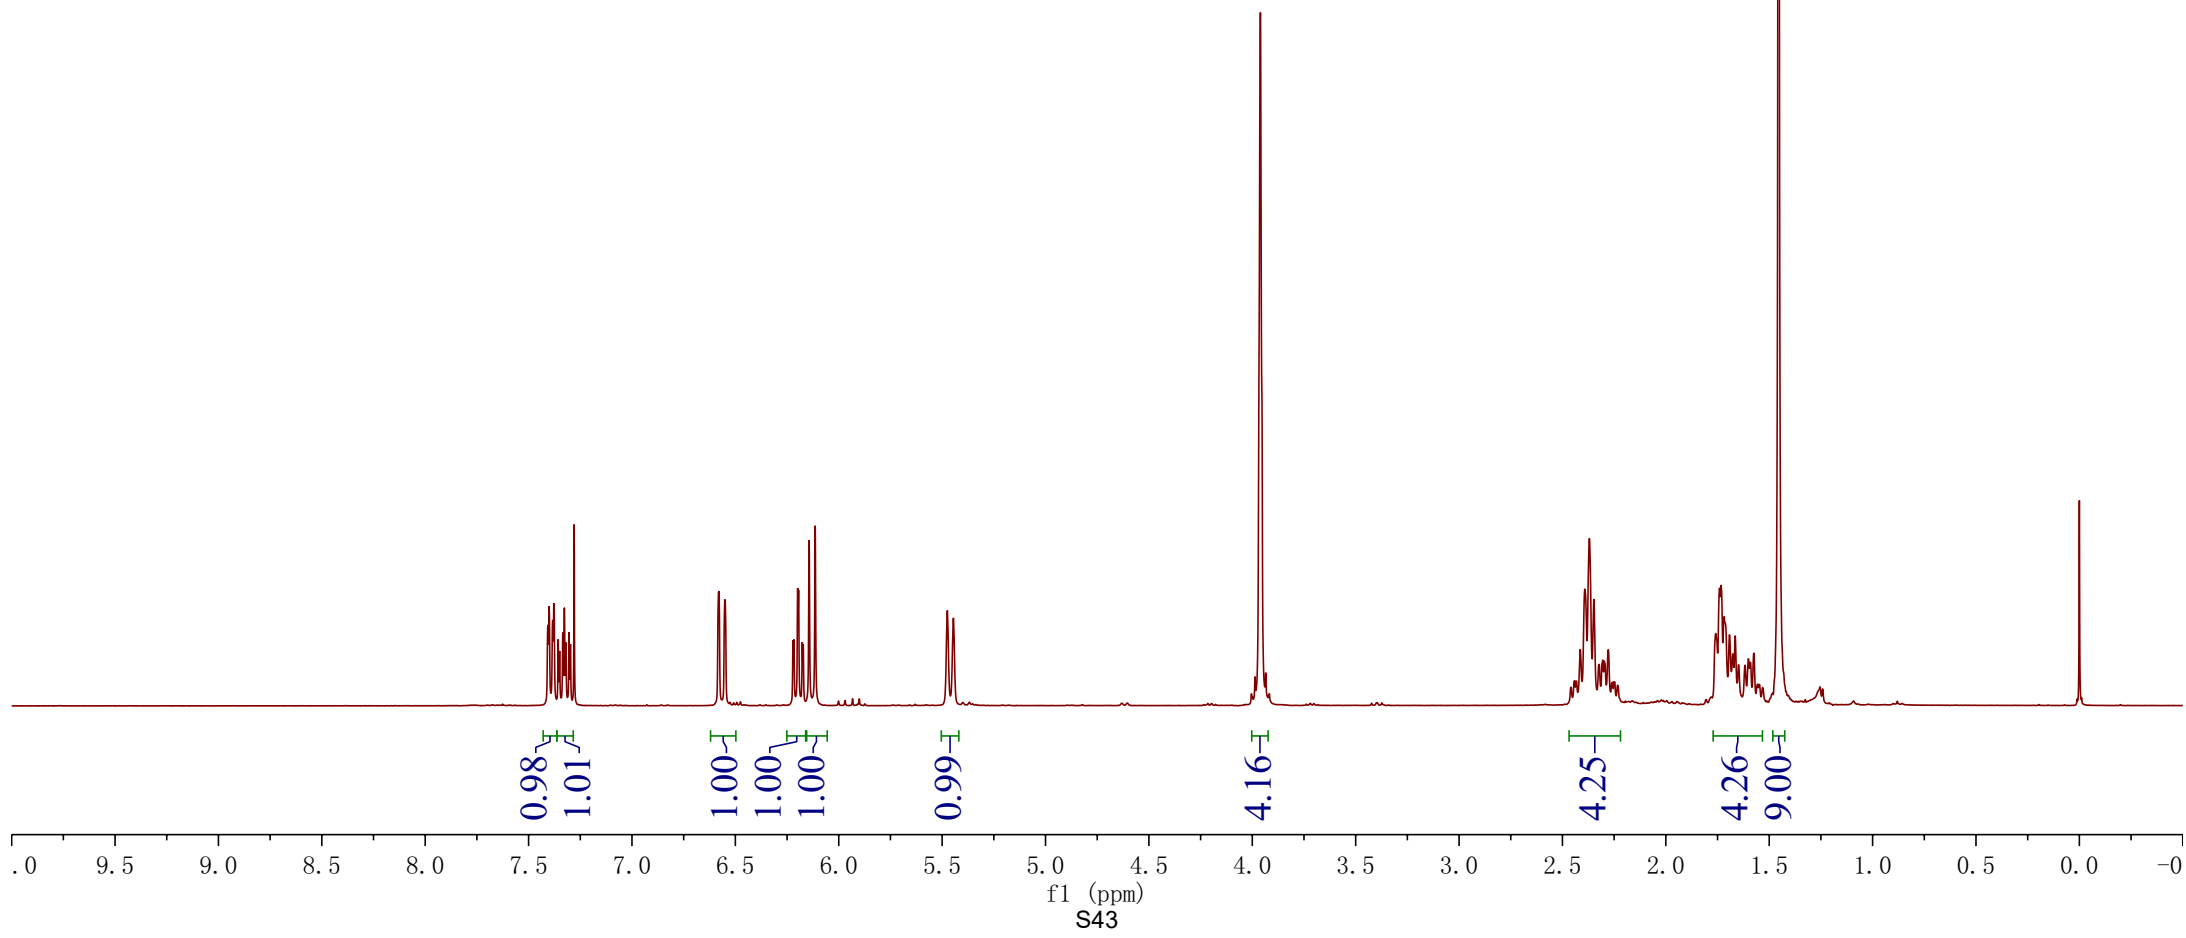

—169.24 —162.23 —148.11 —139.46 —135.42  
~120.33 ~115.17 /108.23 /105.84 —82.63  
{64.45 {64.42 —56.00  
/35.95 —34.90 \33.51 ~27.93 \26.25

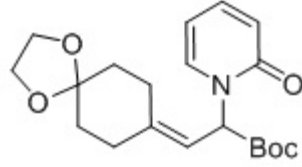

3al

75 MHz, CDCl<sub>3</sub>

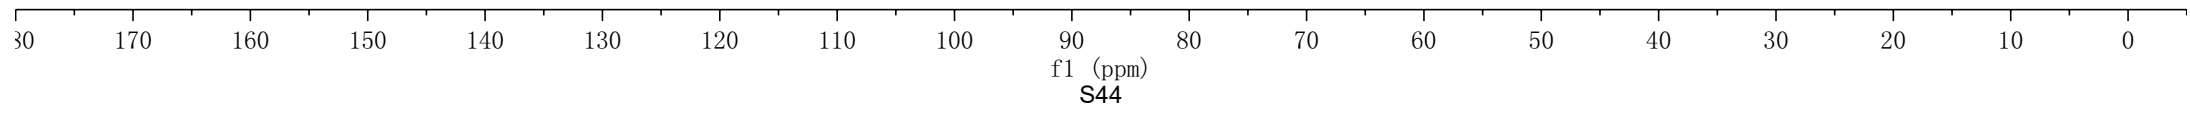

7.40  
7.39  
7.37  
7.37  
7.34  
7.33  
7.32  
7.31  
7.30  
7.29  
7.28  
7.28  
6.57  
6.54  
6.20  
6.19  
6.17  
6.17  
6.15  
6.15  
6.07  
6.03  
5.51  
5.47  
2.23  
2.21  
2.20  
2.19  
2.17  
2.15  
2.07  
2.05  
2.02  
1.70  
1.68  
1.67  
1.59  
1.57  
1.57  
1.54  
1.52  
1.49  
1.46  
1.43  
1.40  
1.38  
1.32  
1.30  
1.26  
-0.00

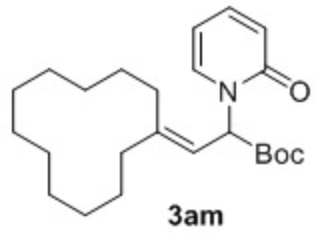

300 MHz, CDCl<sub>3</sub>

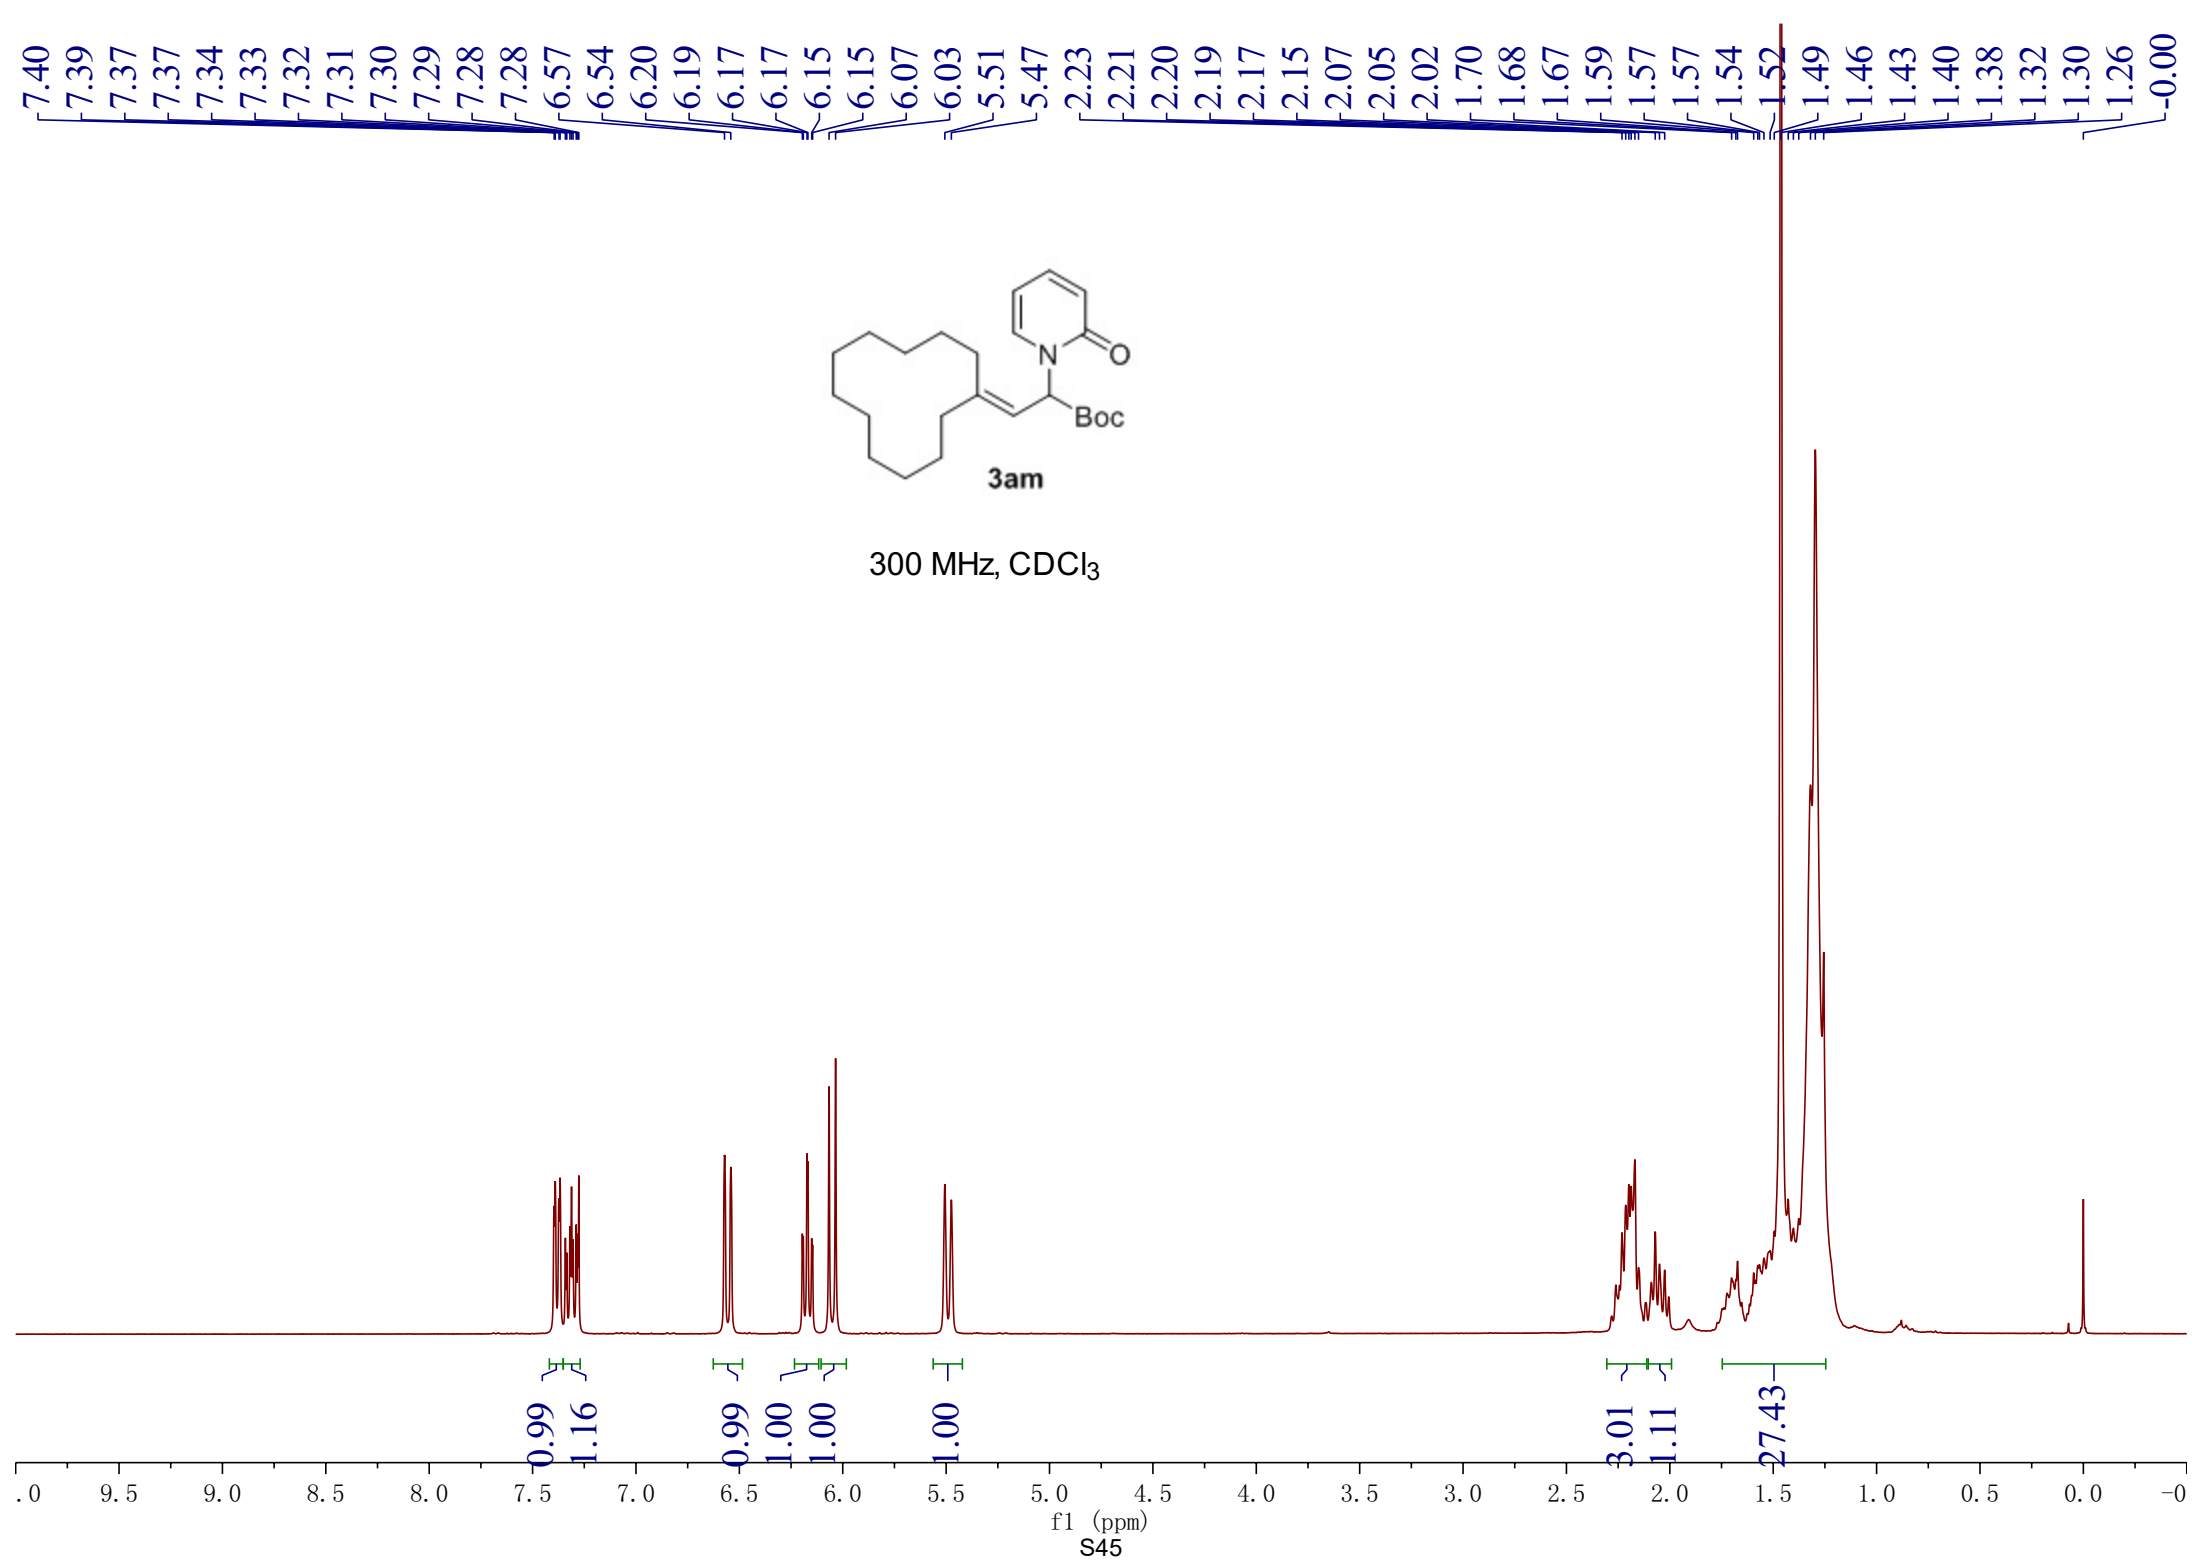

f1 (ppm)  
S45

—169.82 —162.31 —150.16 —139.32 —135.46 —120.35 —116.82 —105.54 —82.29 —56.45 31.17 30.04 27.94 25.17 25.02 23.99 23.72 23.60 23.56 23.14 23.08 22.21

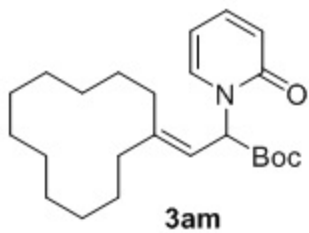

75 MHz, CDCl<sub>3</sub>

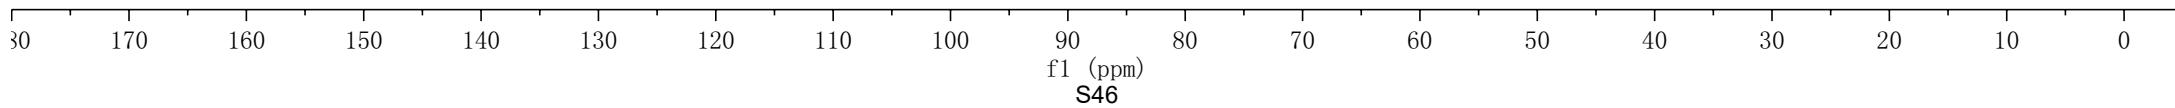



7.63  
7.60  
7.32  
7.31  
7.30  
7.28  
7.28

6.55  
6.55  
6.16  
6.16  
6.12  
5.49  
5.46

3.16  
3.14  
3.12  
3.10  
3.05  
3.03  
3.02  
3.00  
2.99  
2.98  
2.97  
2.96

2.45  
2.42  
2.38  
2.37  
2.34  
1.38

-0.00

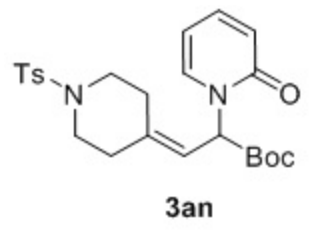

300 MHz, CDCl<sub>3</sub>

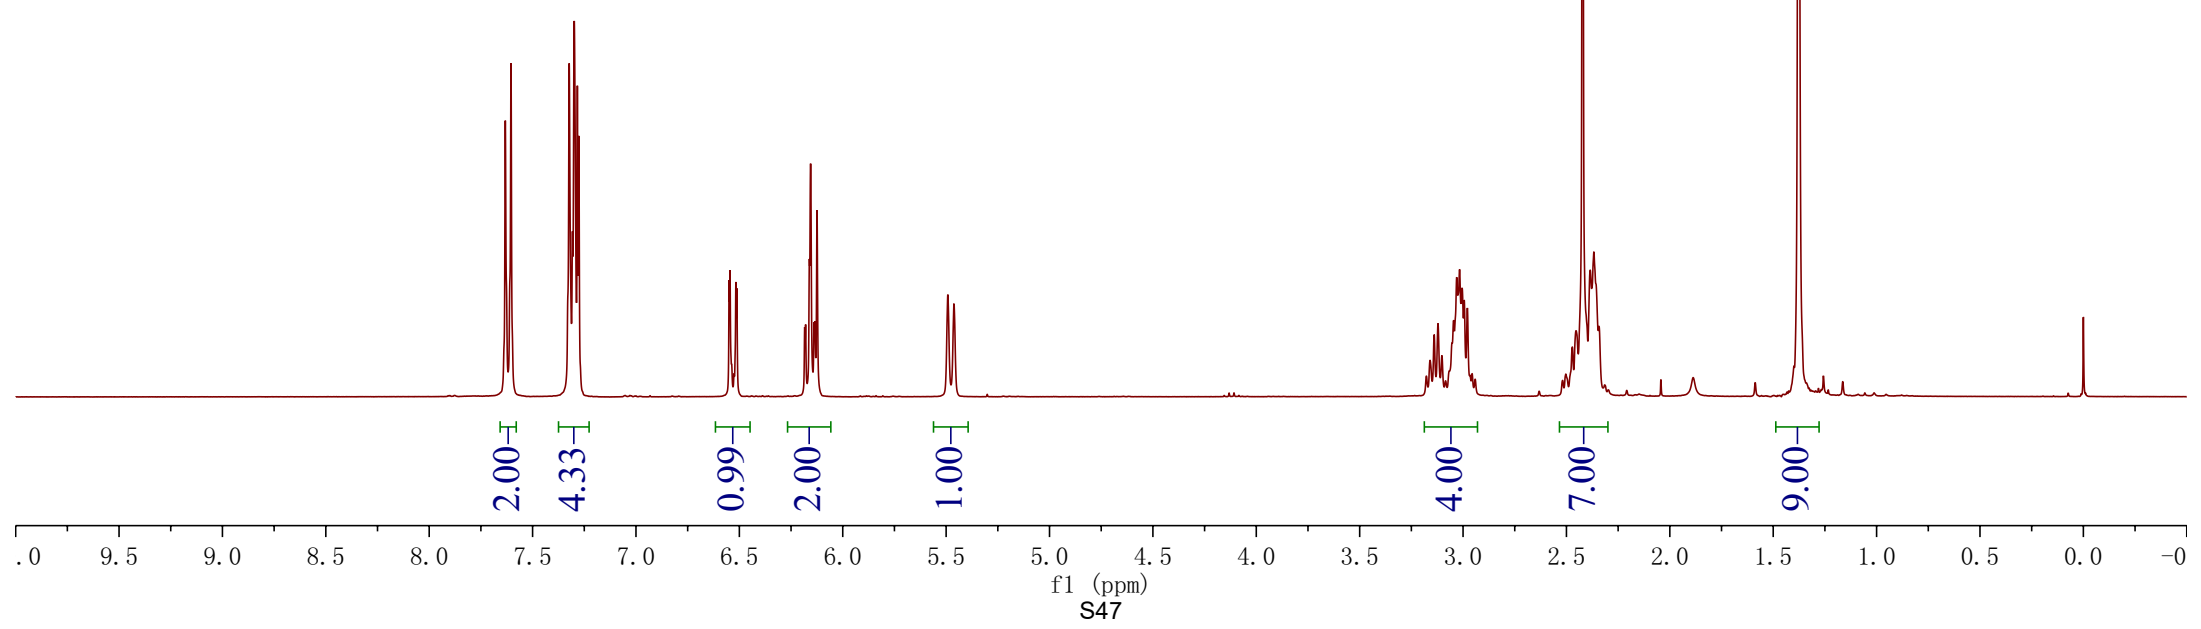

-168.52

-161.92

143.67

143.47

139.49

135.37

133.19

129.71

127.61

120.43

117.46

-106.01

-82.92

-55.21

47.43

46.72

35.14

28.64

27.83

21.51

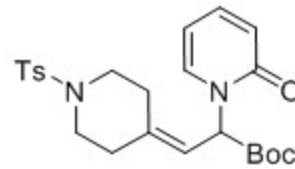

3an

75 MHz, CDCl<sub>3</sub>

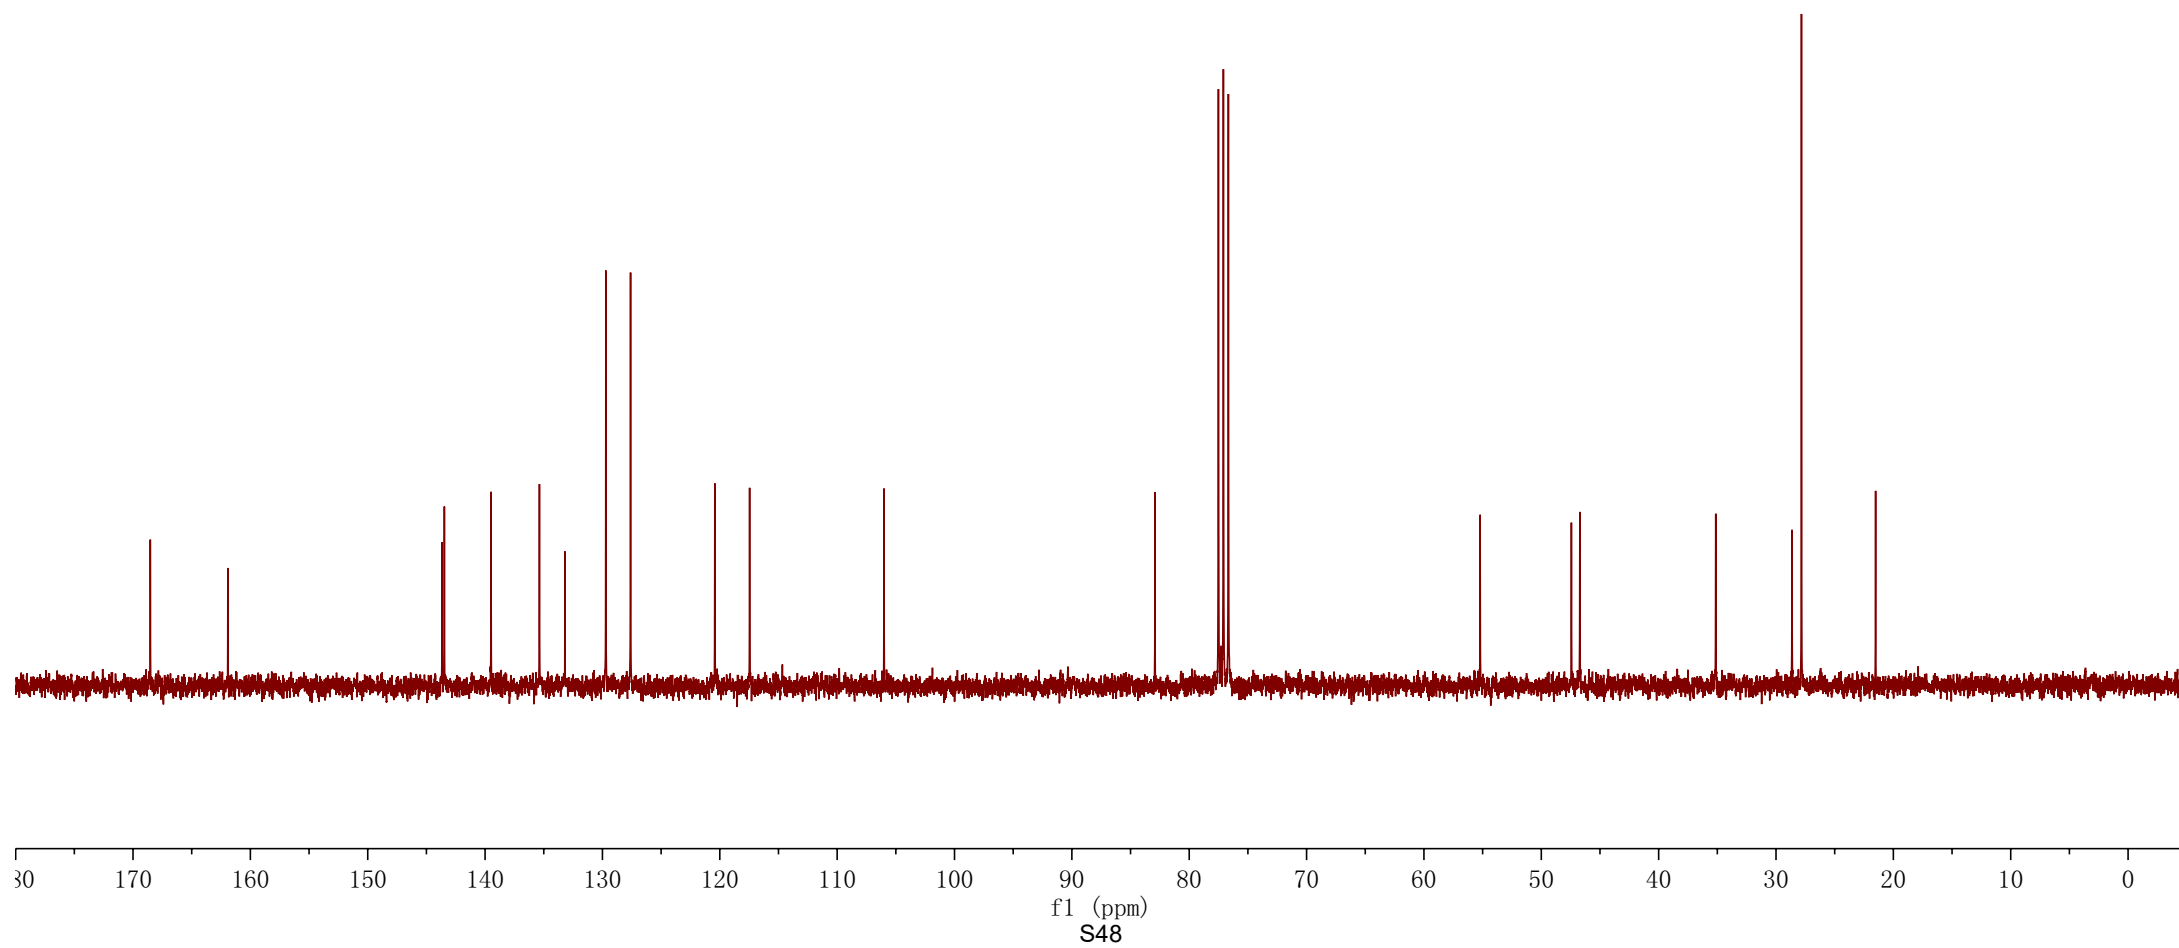

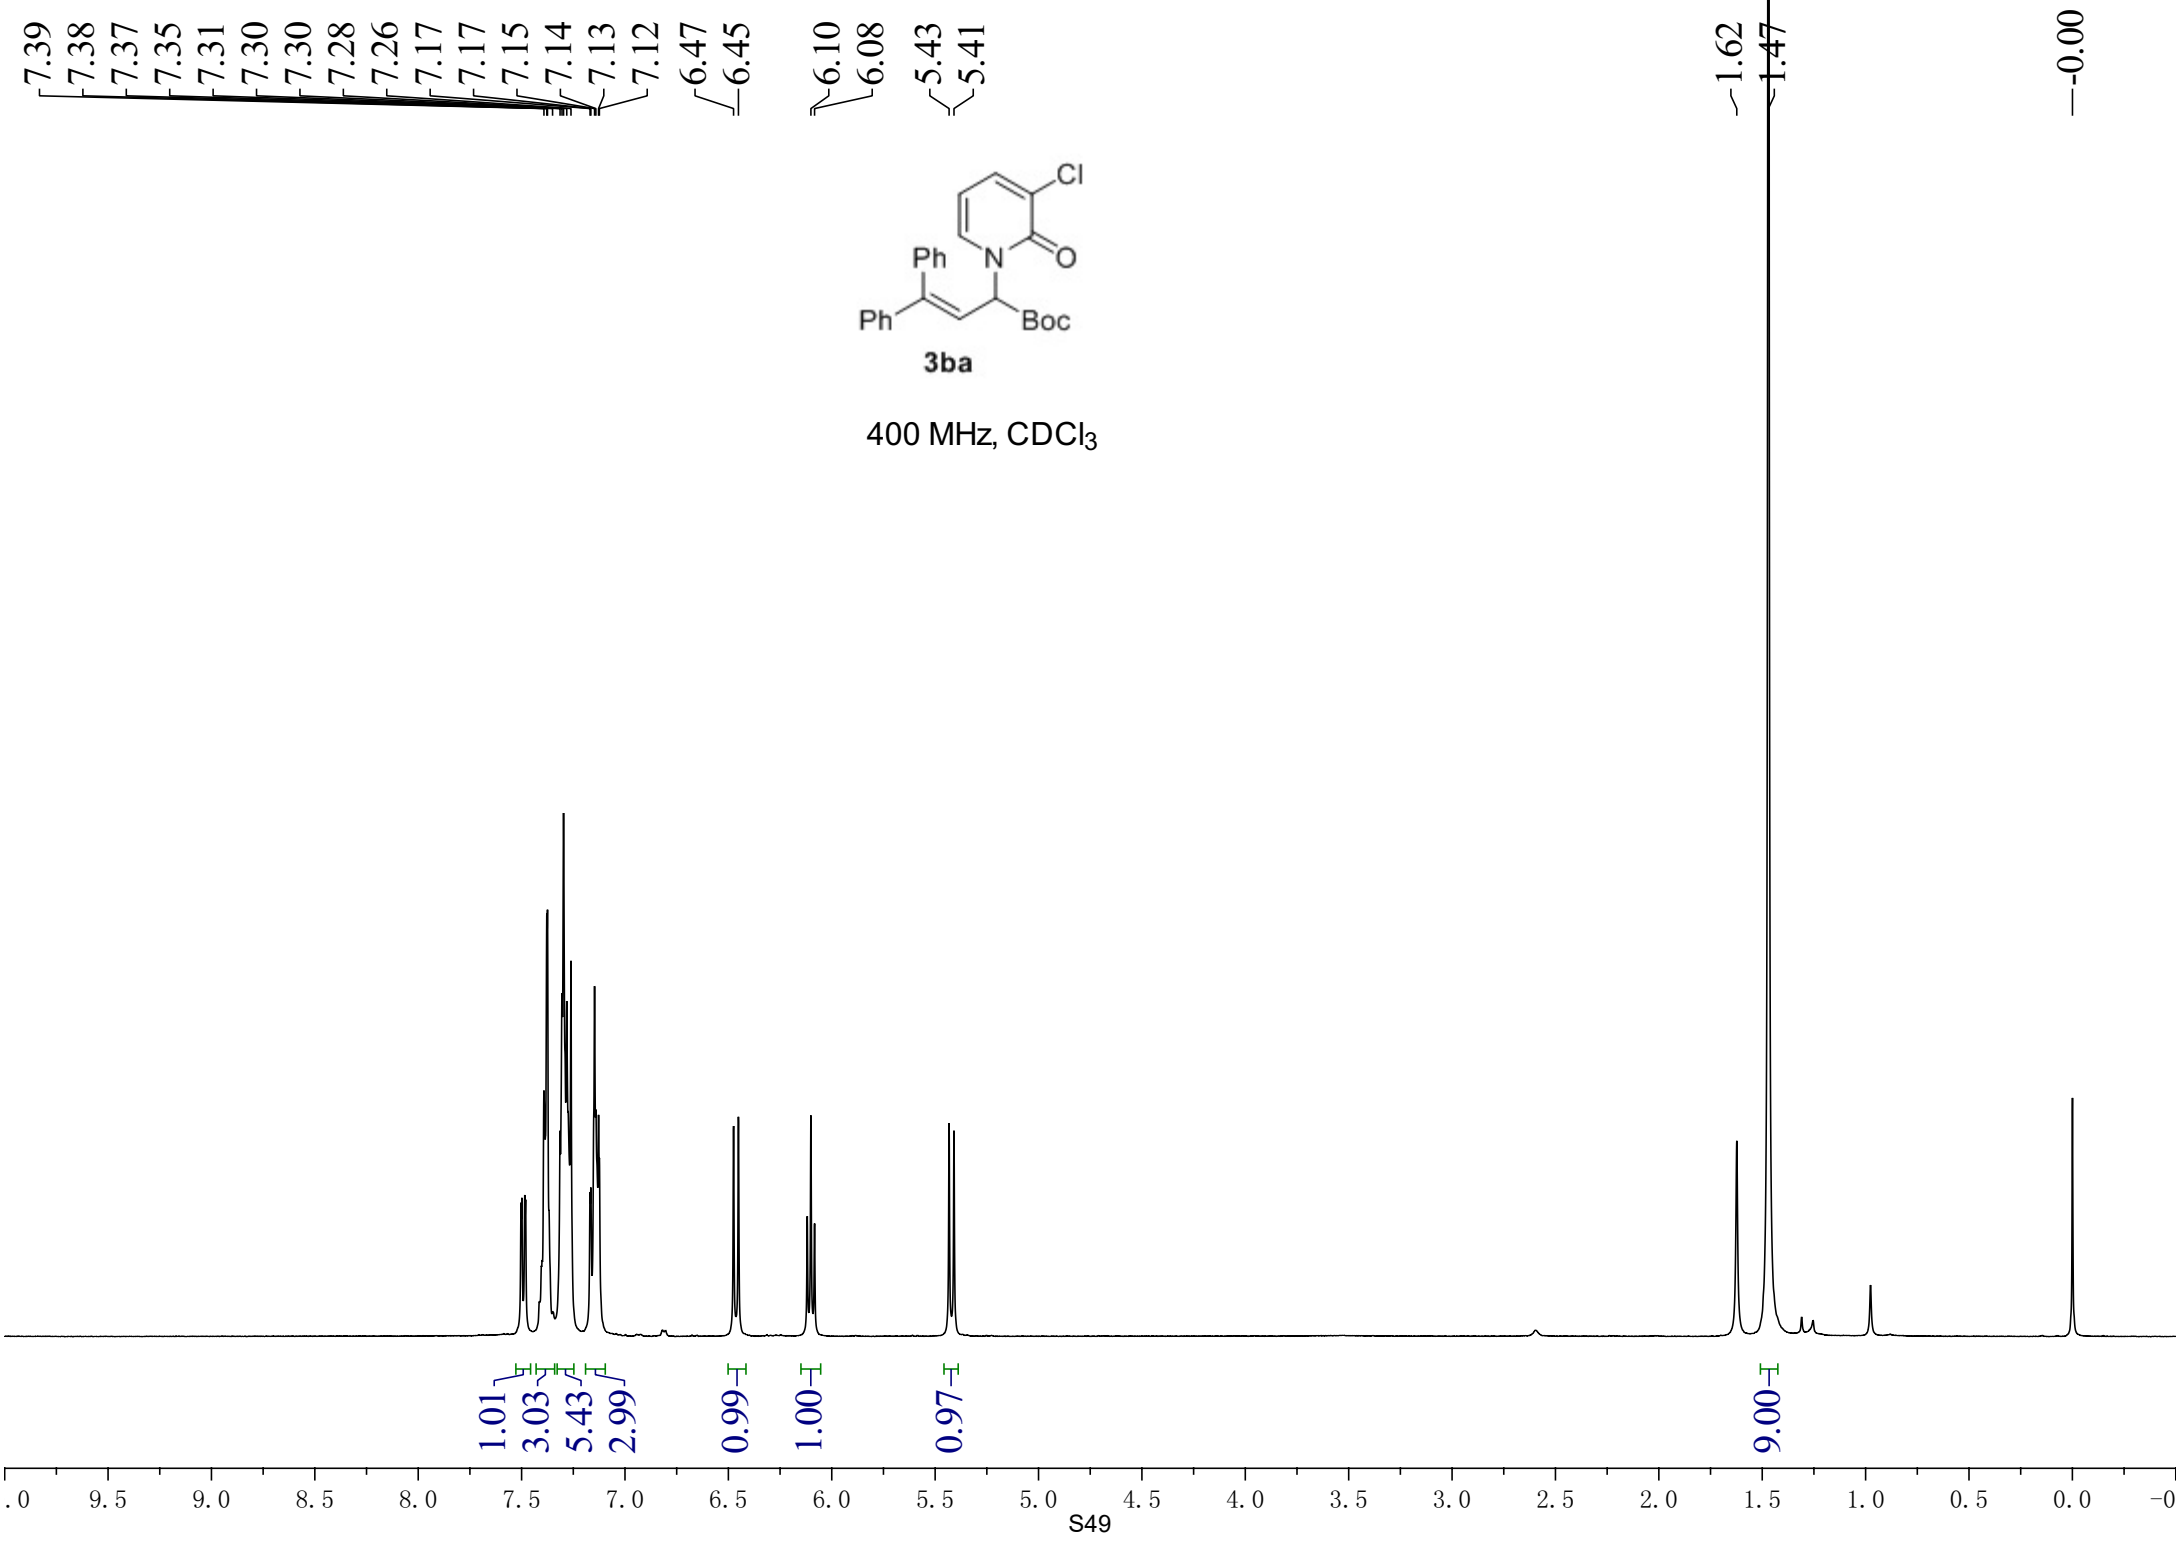

—167.83  
—158.46  
—149.82  
140.77  
138.16  
137.65  
135.02  
129.33  
128.86  
128.64  
128.48  
128.38  
127.76  
119.71  
105.00

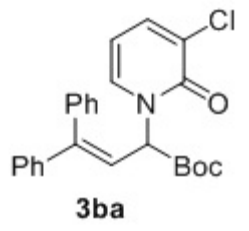

75 MHz, CDCl<sub>3</sub>

—83.15  
—62.50  
—28.08

30 170 160 150 140 130 120 110 100 90 80 70 60 50 40 30 20 10 0

S50

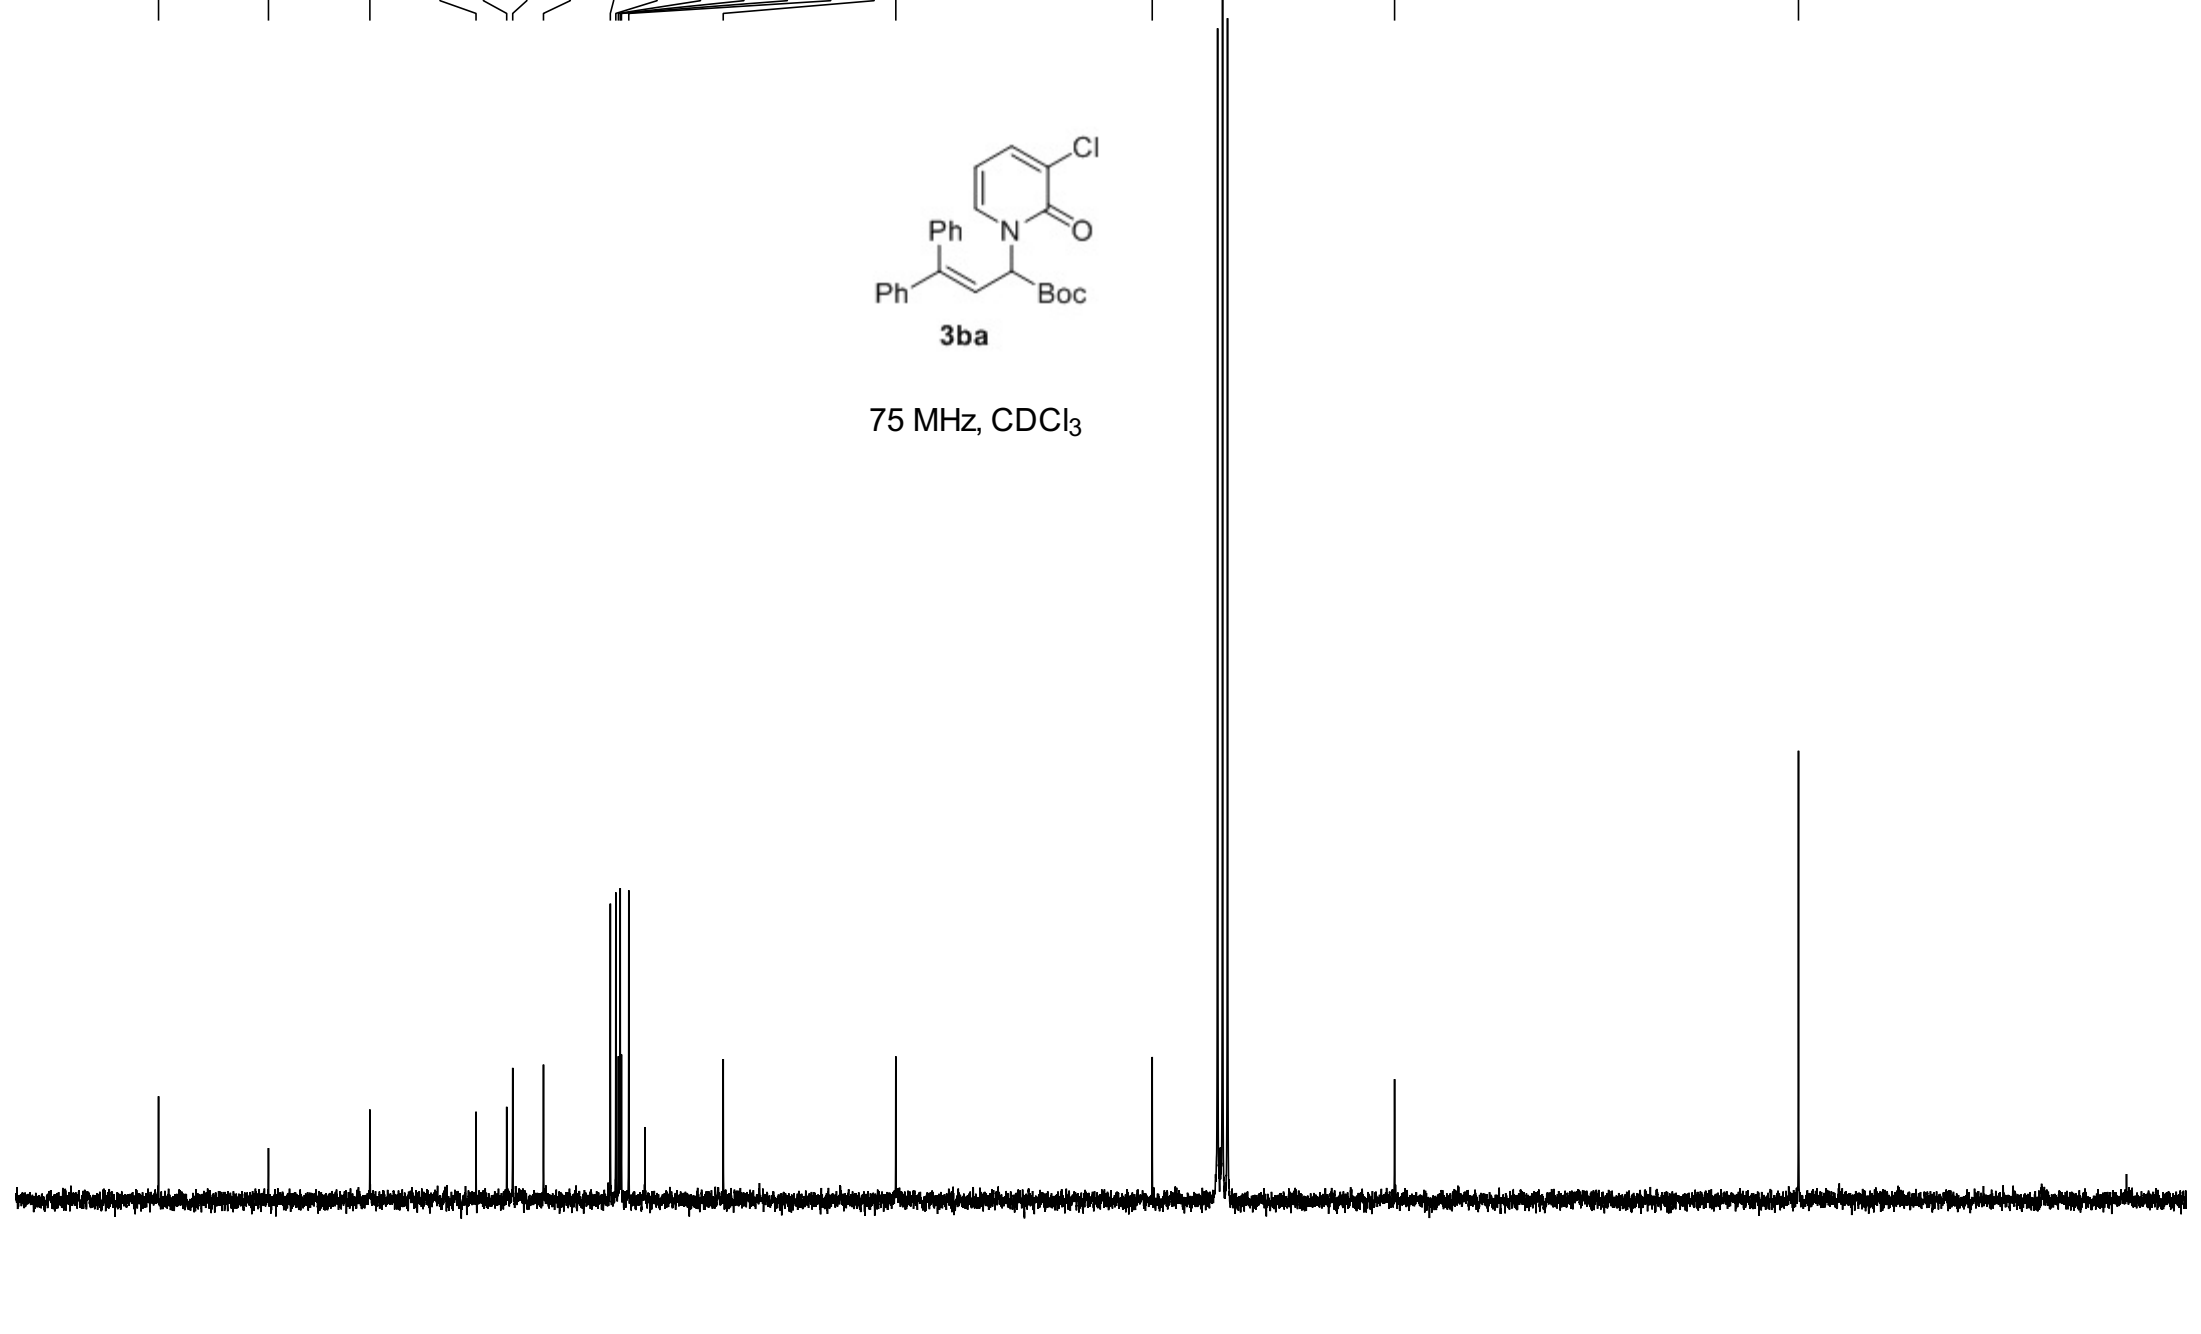

7.39  
7.38  
7.36  
7.35  
7.28  
7.26  
7.17  
7.16  
7.15  
7.08  
7.07

6.51  
6.49  
6.07  
6.05  
6.03

5.34  
5.32

-2.10

1.47

-0.00

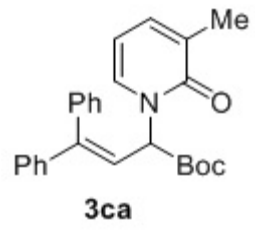

400 MHz, CDCl<sub>3</sub>

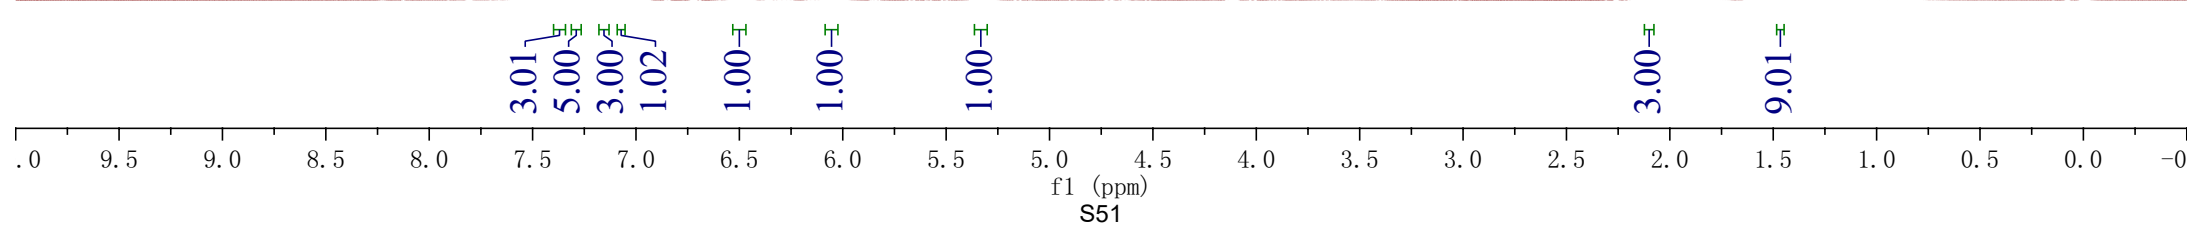

—168.35 —162.34 —148.81  
/ 138.33 —136.68 ~ 133.61 129.79 129.38 128.64 128.32 128.08 127.65 129.58 105.39  
—82.43 —61.91 —28.01 —17.21

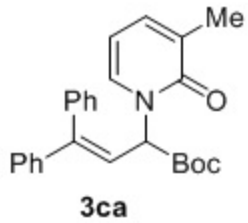

100 MHz, CDCl<sub>3</sub>

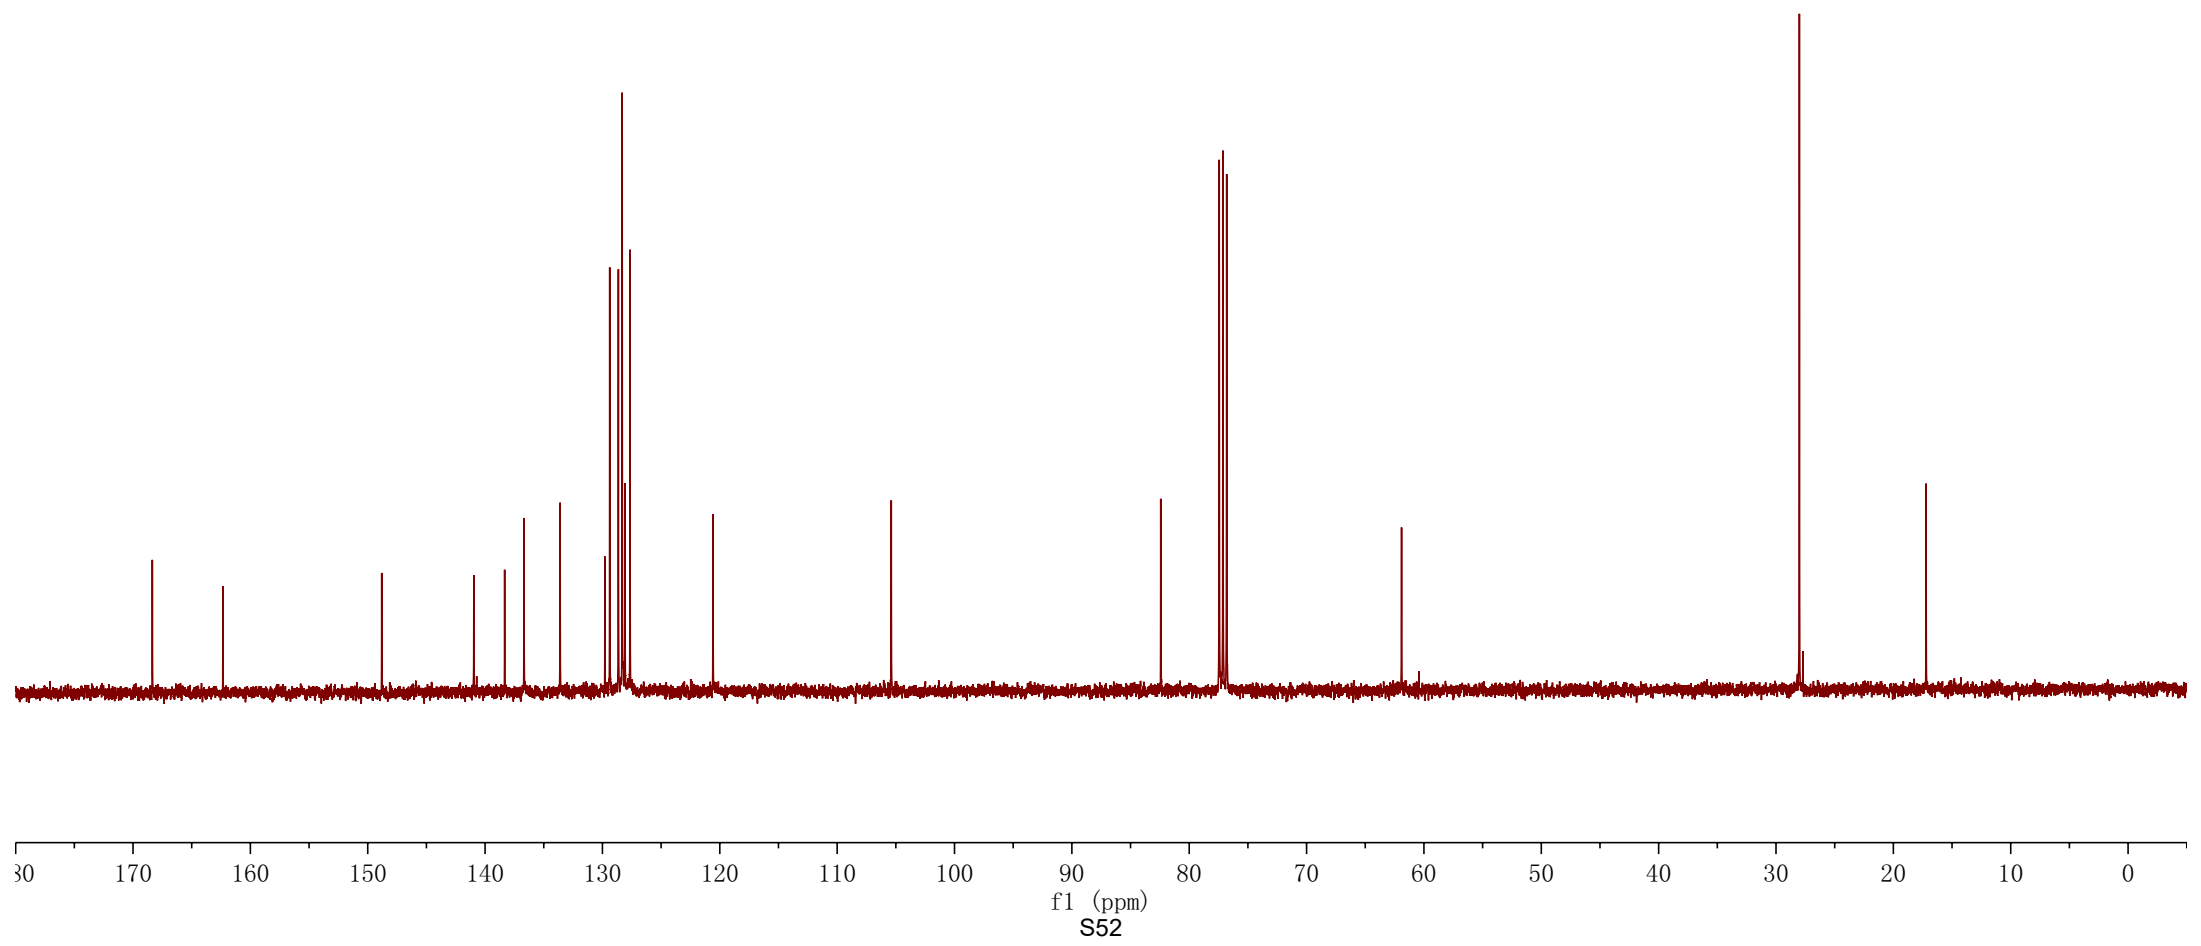

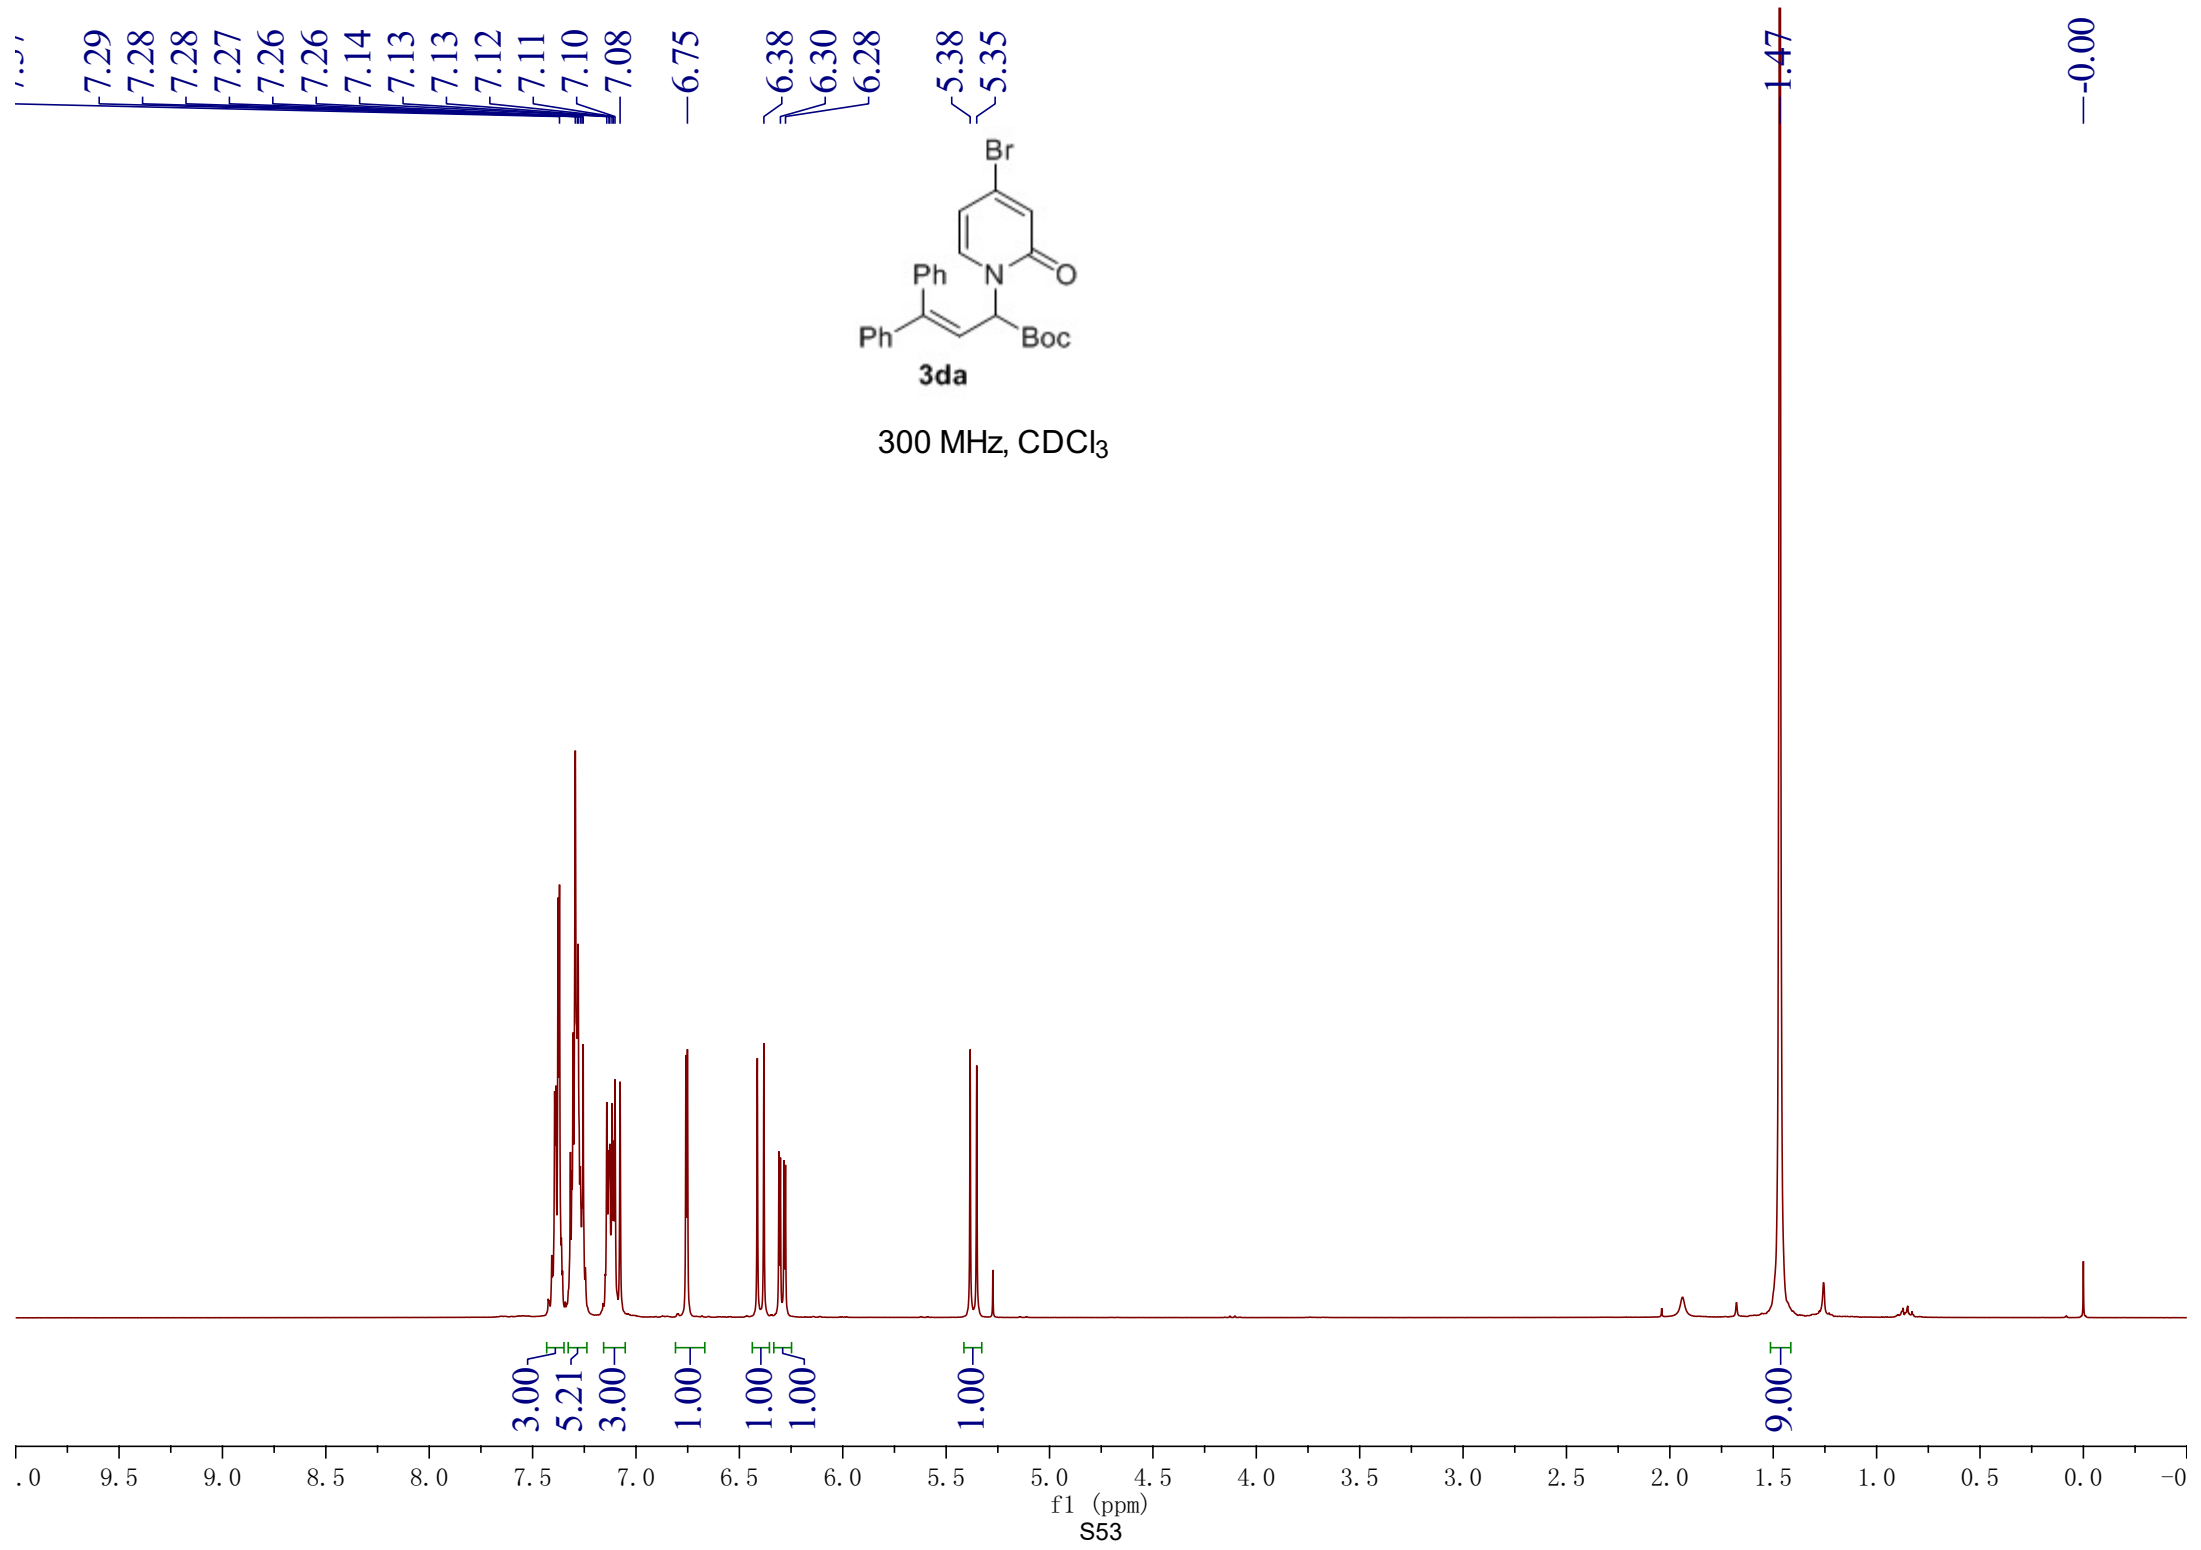

—167.86  
—160.71  
—150.12  
136.05  
129.20  
128.78  
128.63  
128.42  
128.34  
127.68  
122.82  
119.25  
110.04

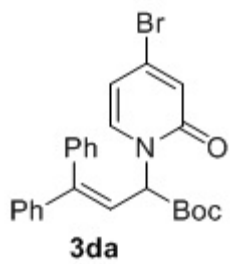

75 MHz, CDCl<sub>3</sub>

—83.01

—61.10

—27.95

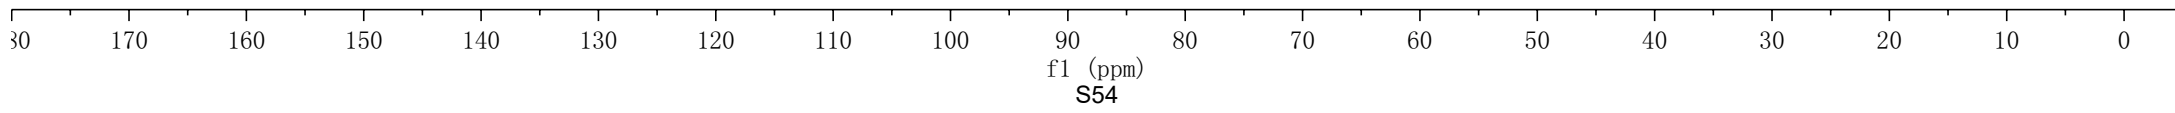



7.31  
7.30  
7.29  
7.28  
7.28  
7.27  
7.26  
7.16  
7.15  
7.14  
7.13  
7.13  
7.11  
6.43  
6.41  
6.32  
6.00  
5.98  
5.37  
5.34  
-2.16  
1.47  
-0.00

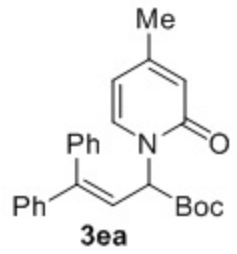

400 MHz, CDCl<sub>3</sub>

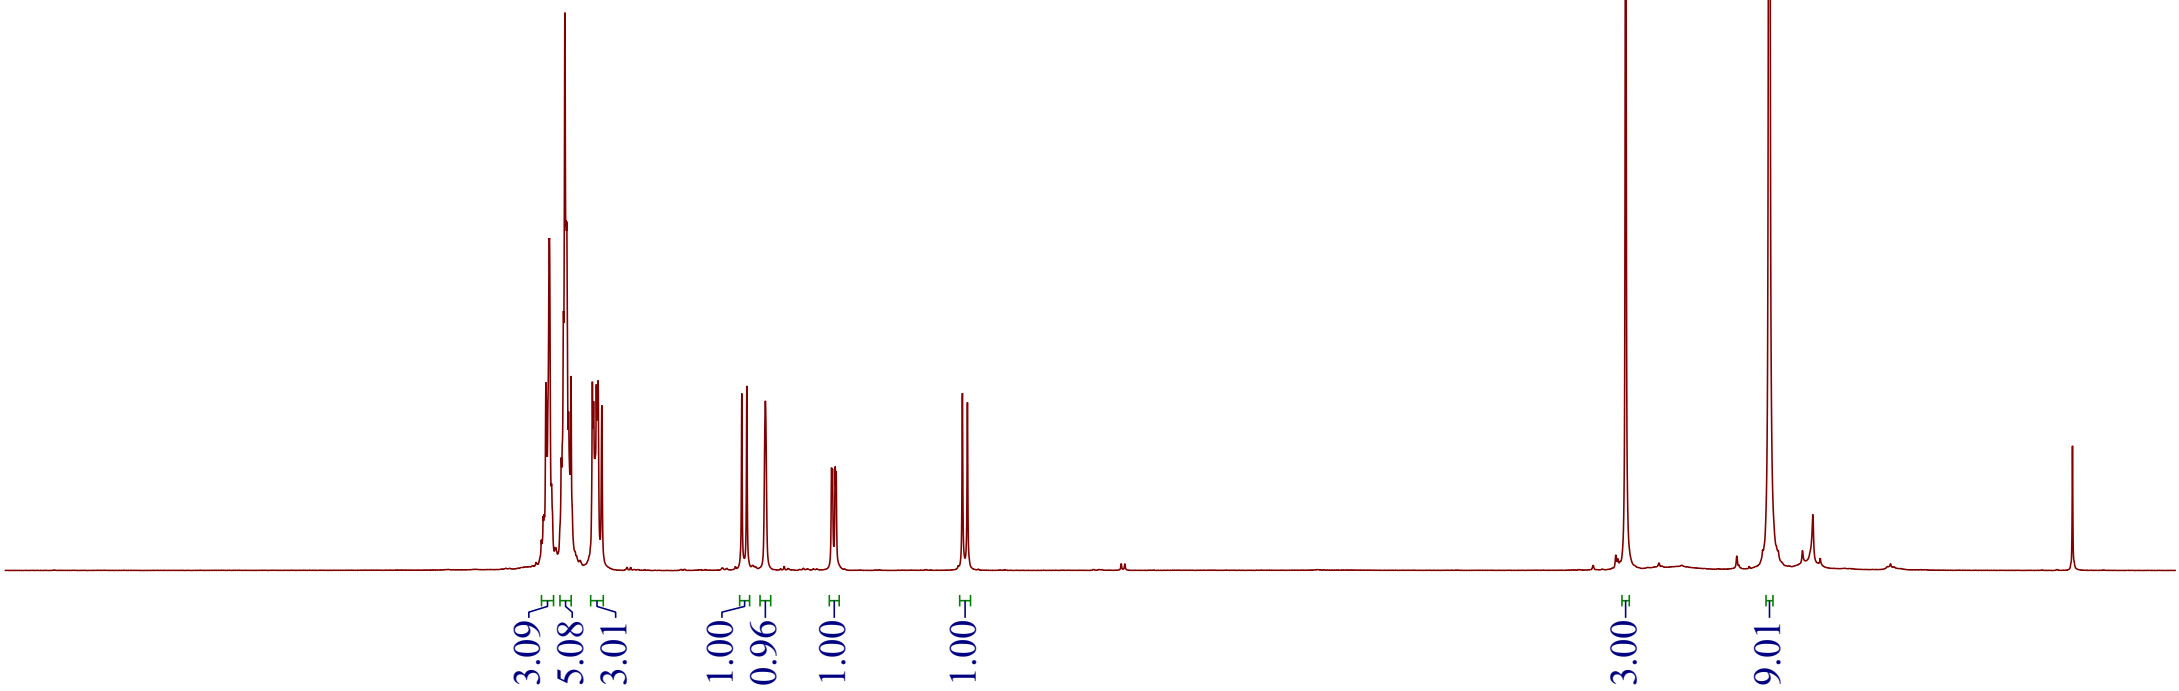

0 9.5 9.0 8.5 8.0 7.5 7.0 6.5 6.0 5.5 5.0 4.5 4.0 3.5 3.0 2.5 2.0 1.5 1.0 0.5 0.0 -0

f1 (ppm)

S55

-168.40

-161.97

-151.18

-149.27

129.35

128.64

128.37

128.32

128.15

127.68

126.98

119.19

-108.30

-82.52

-61.01

-27.96

-21.28

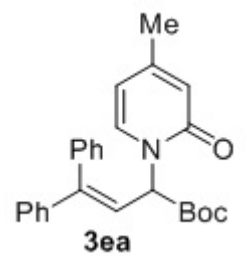

75 MHz, CDCl<sub>3</sub>

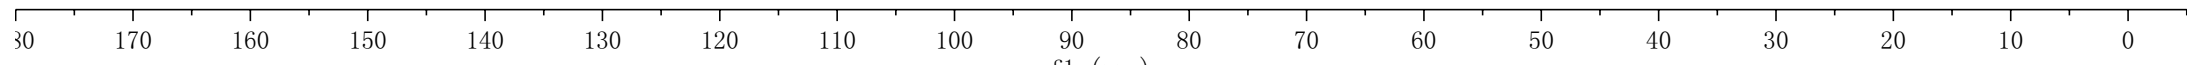

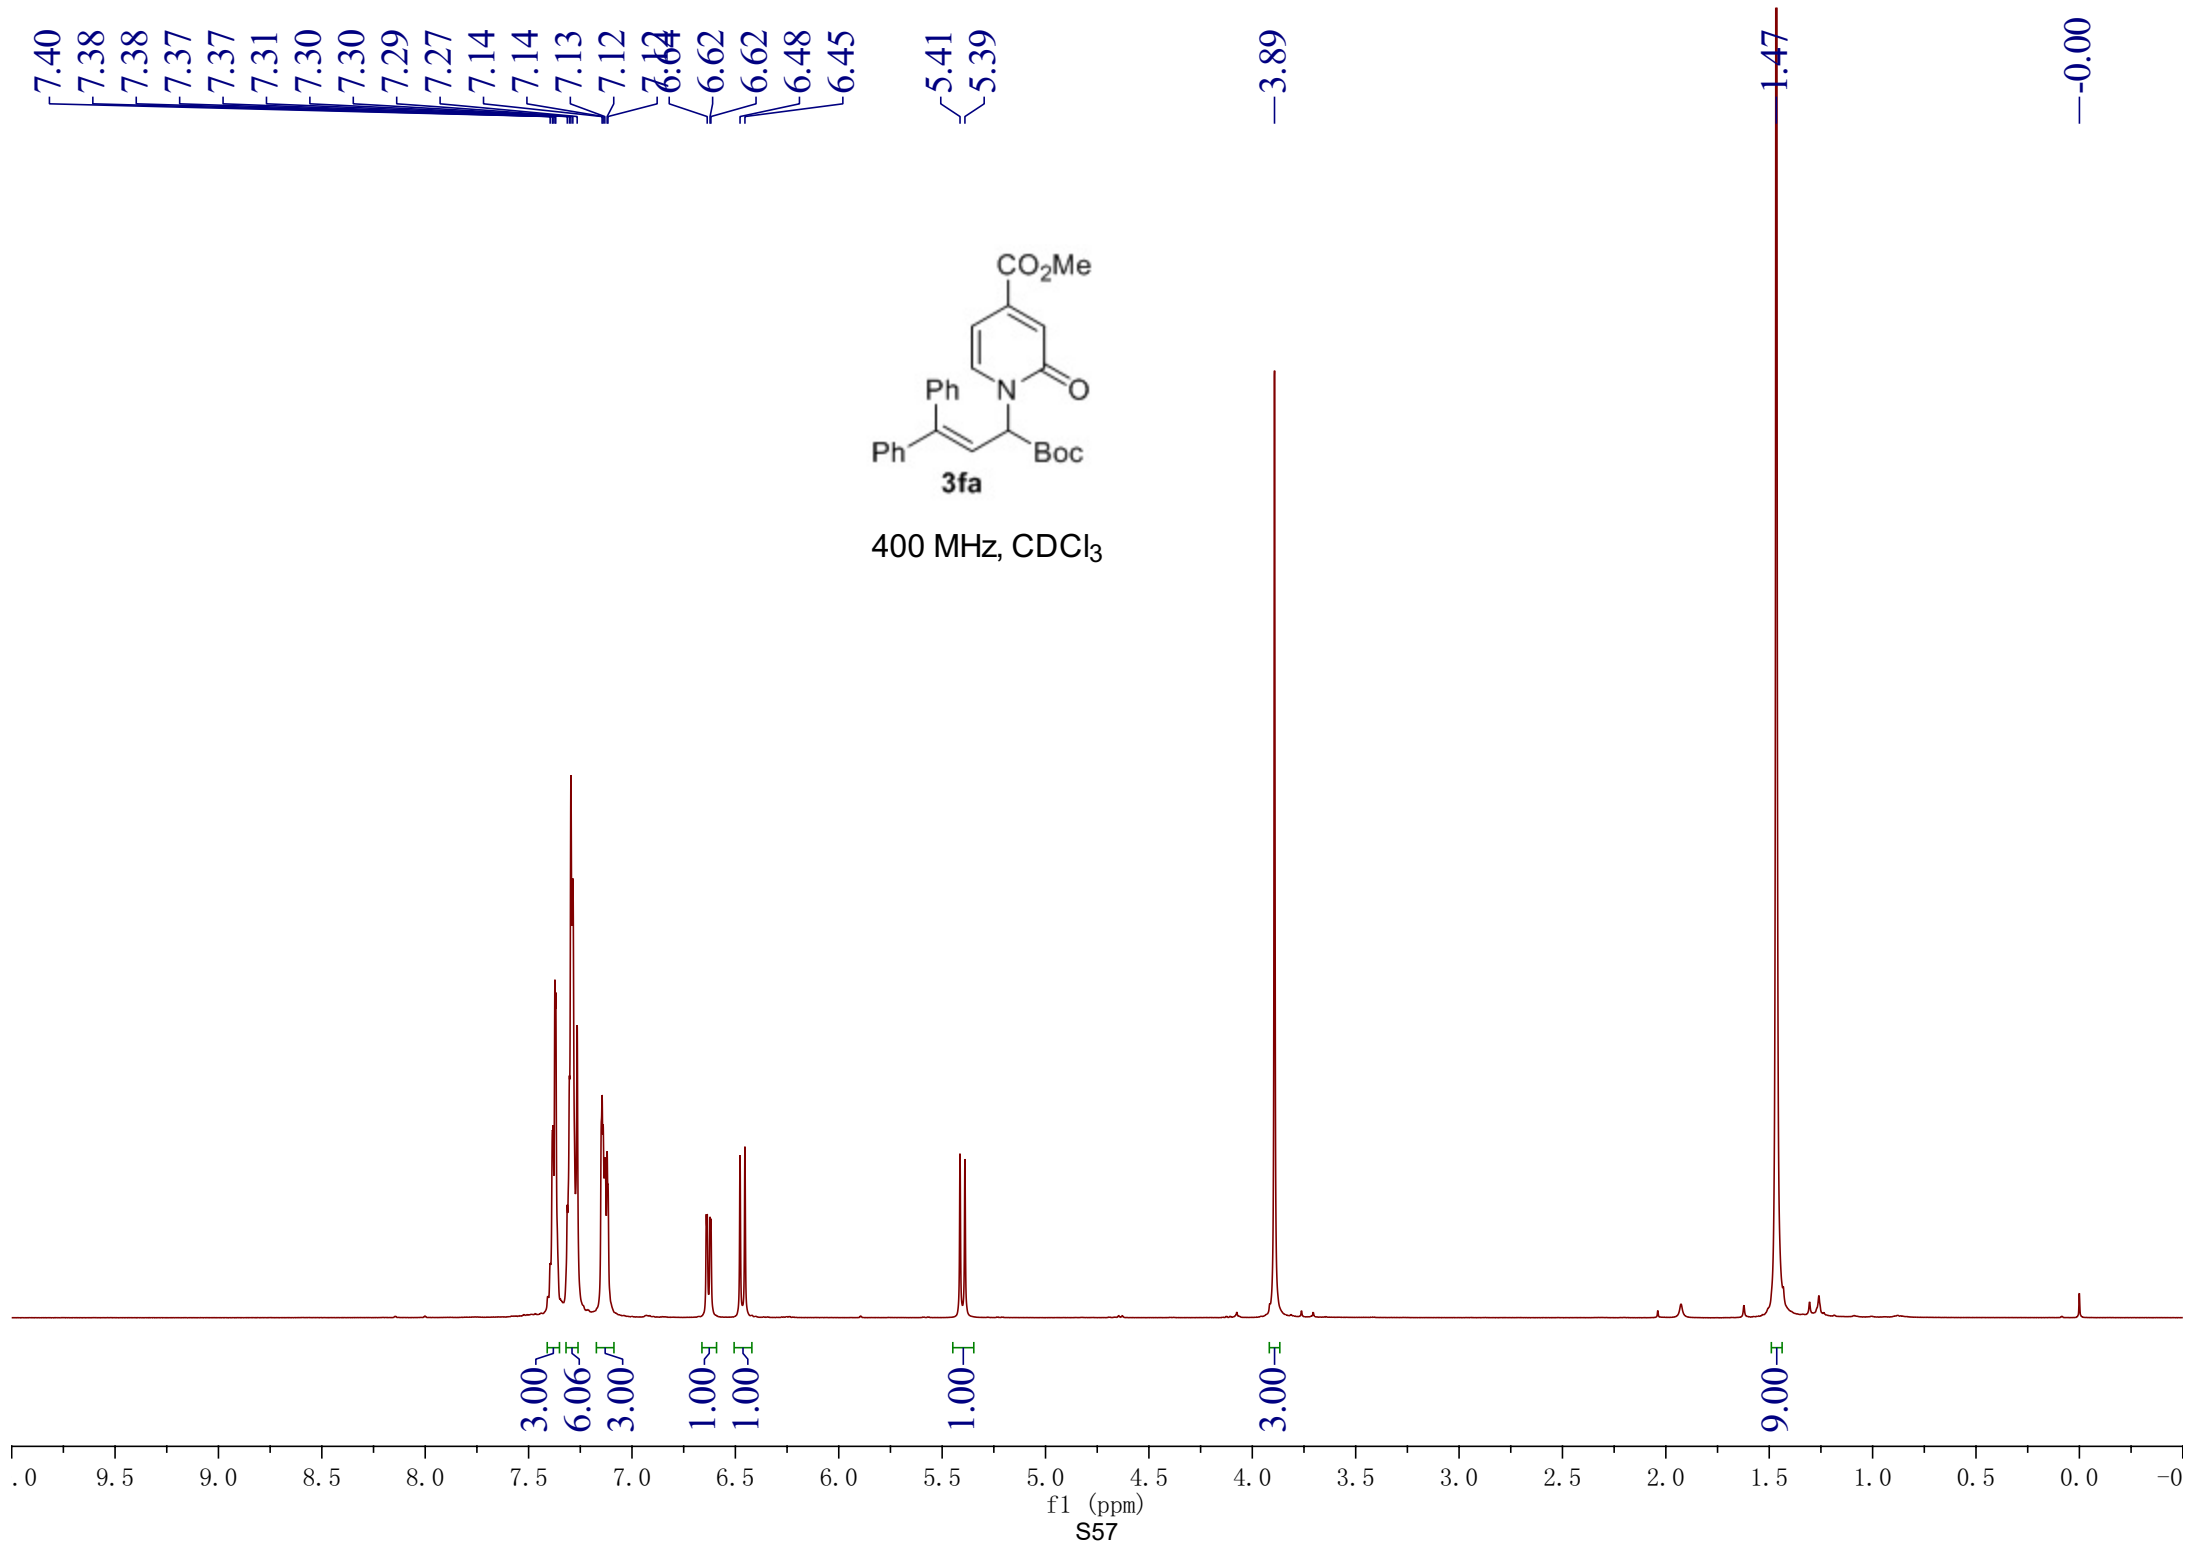

167.80  
165.09  
161.67

149.98

140.63  
140.48  
138.06  
136.62

129.21  
128.78  
128.58  
128.40  
128.30  
127.87  
122.63  
119.43

104.14

82.94

61.58

52.87

27.94

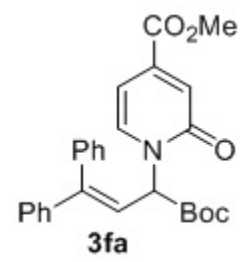

100 MHz, CDCl<sub>3</sub>

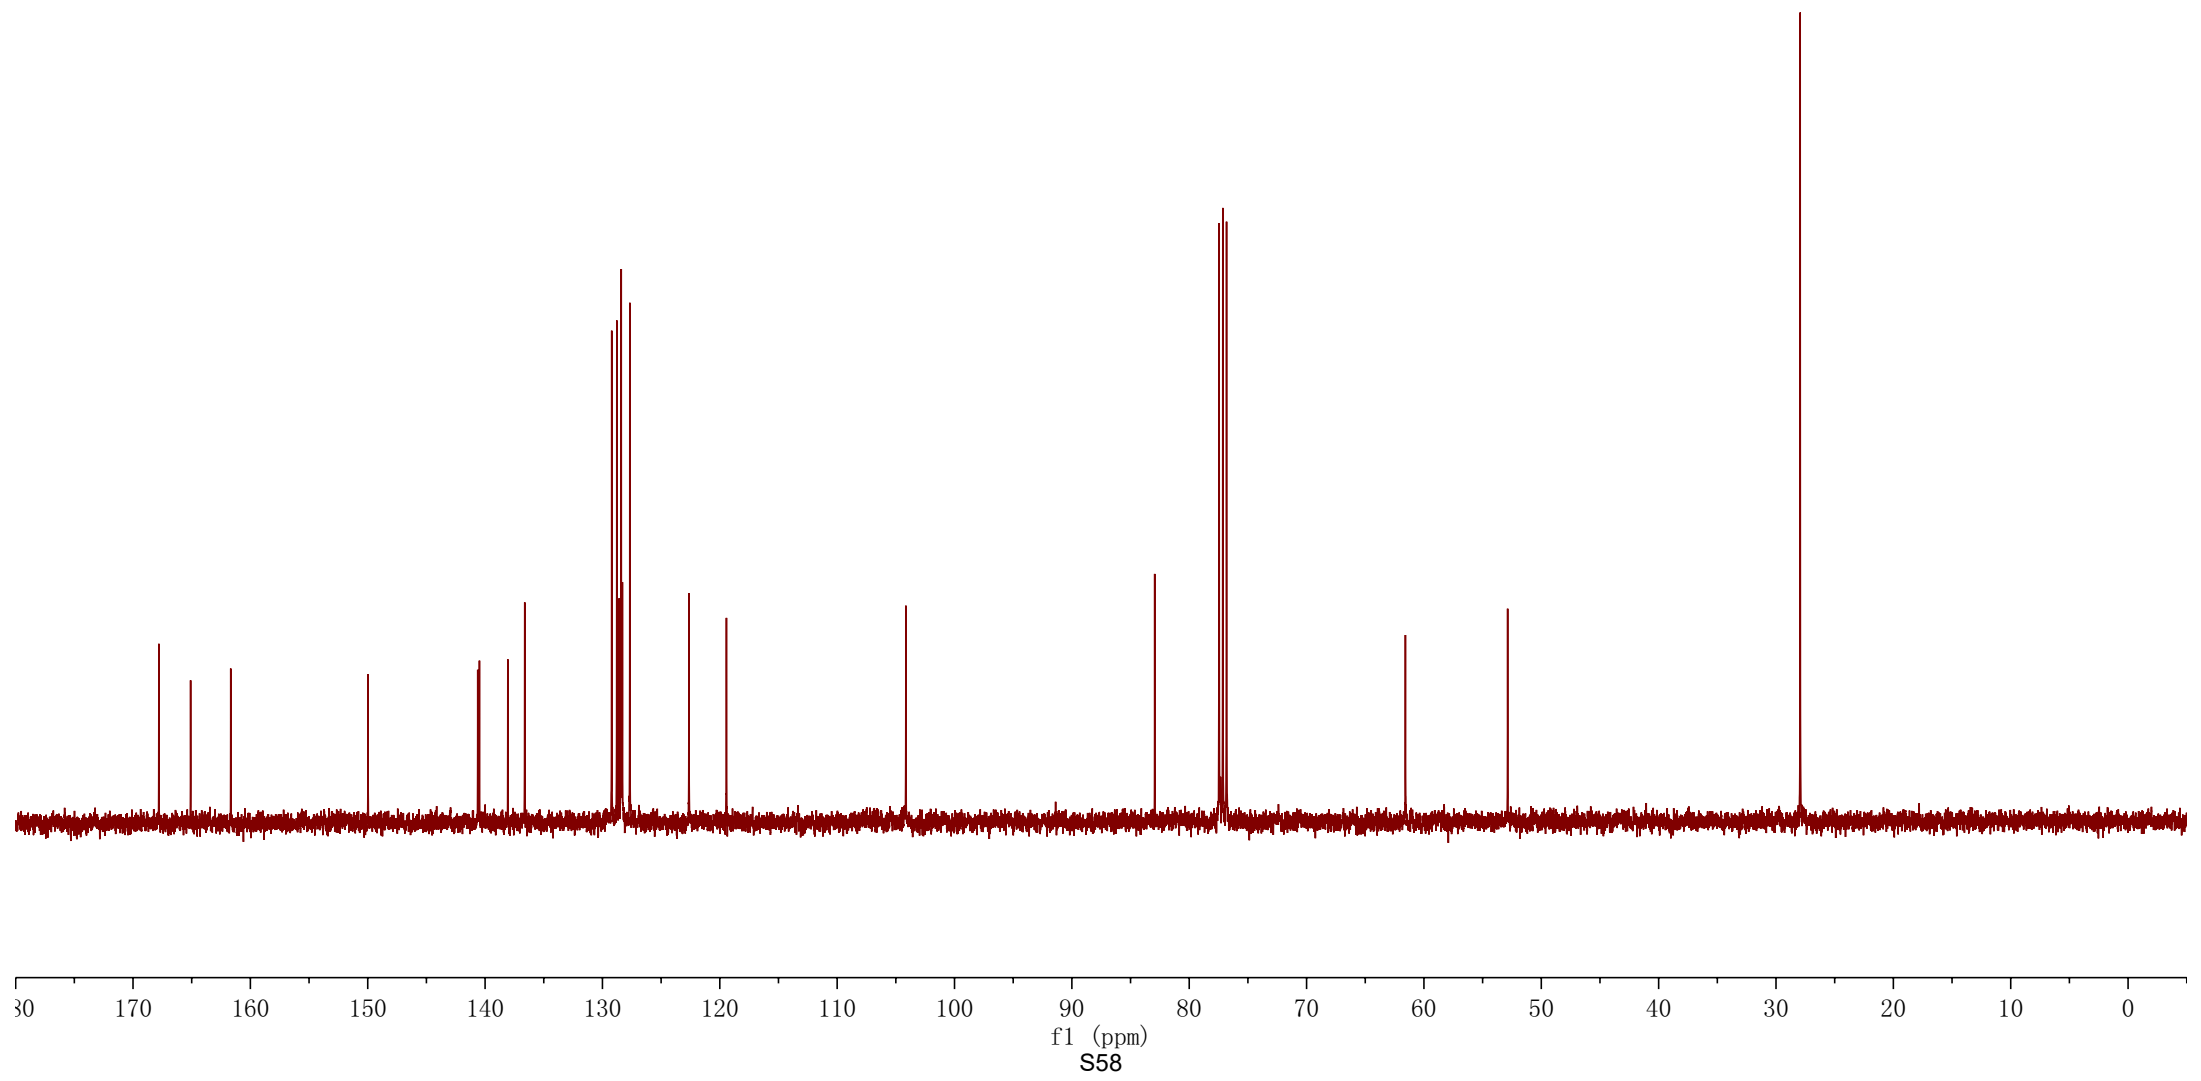

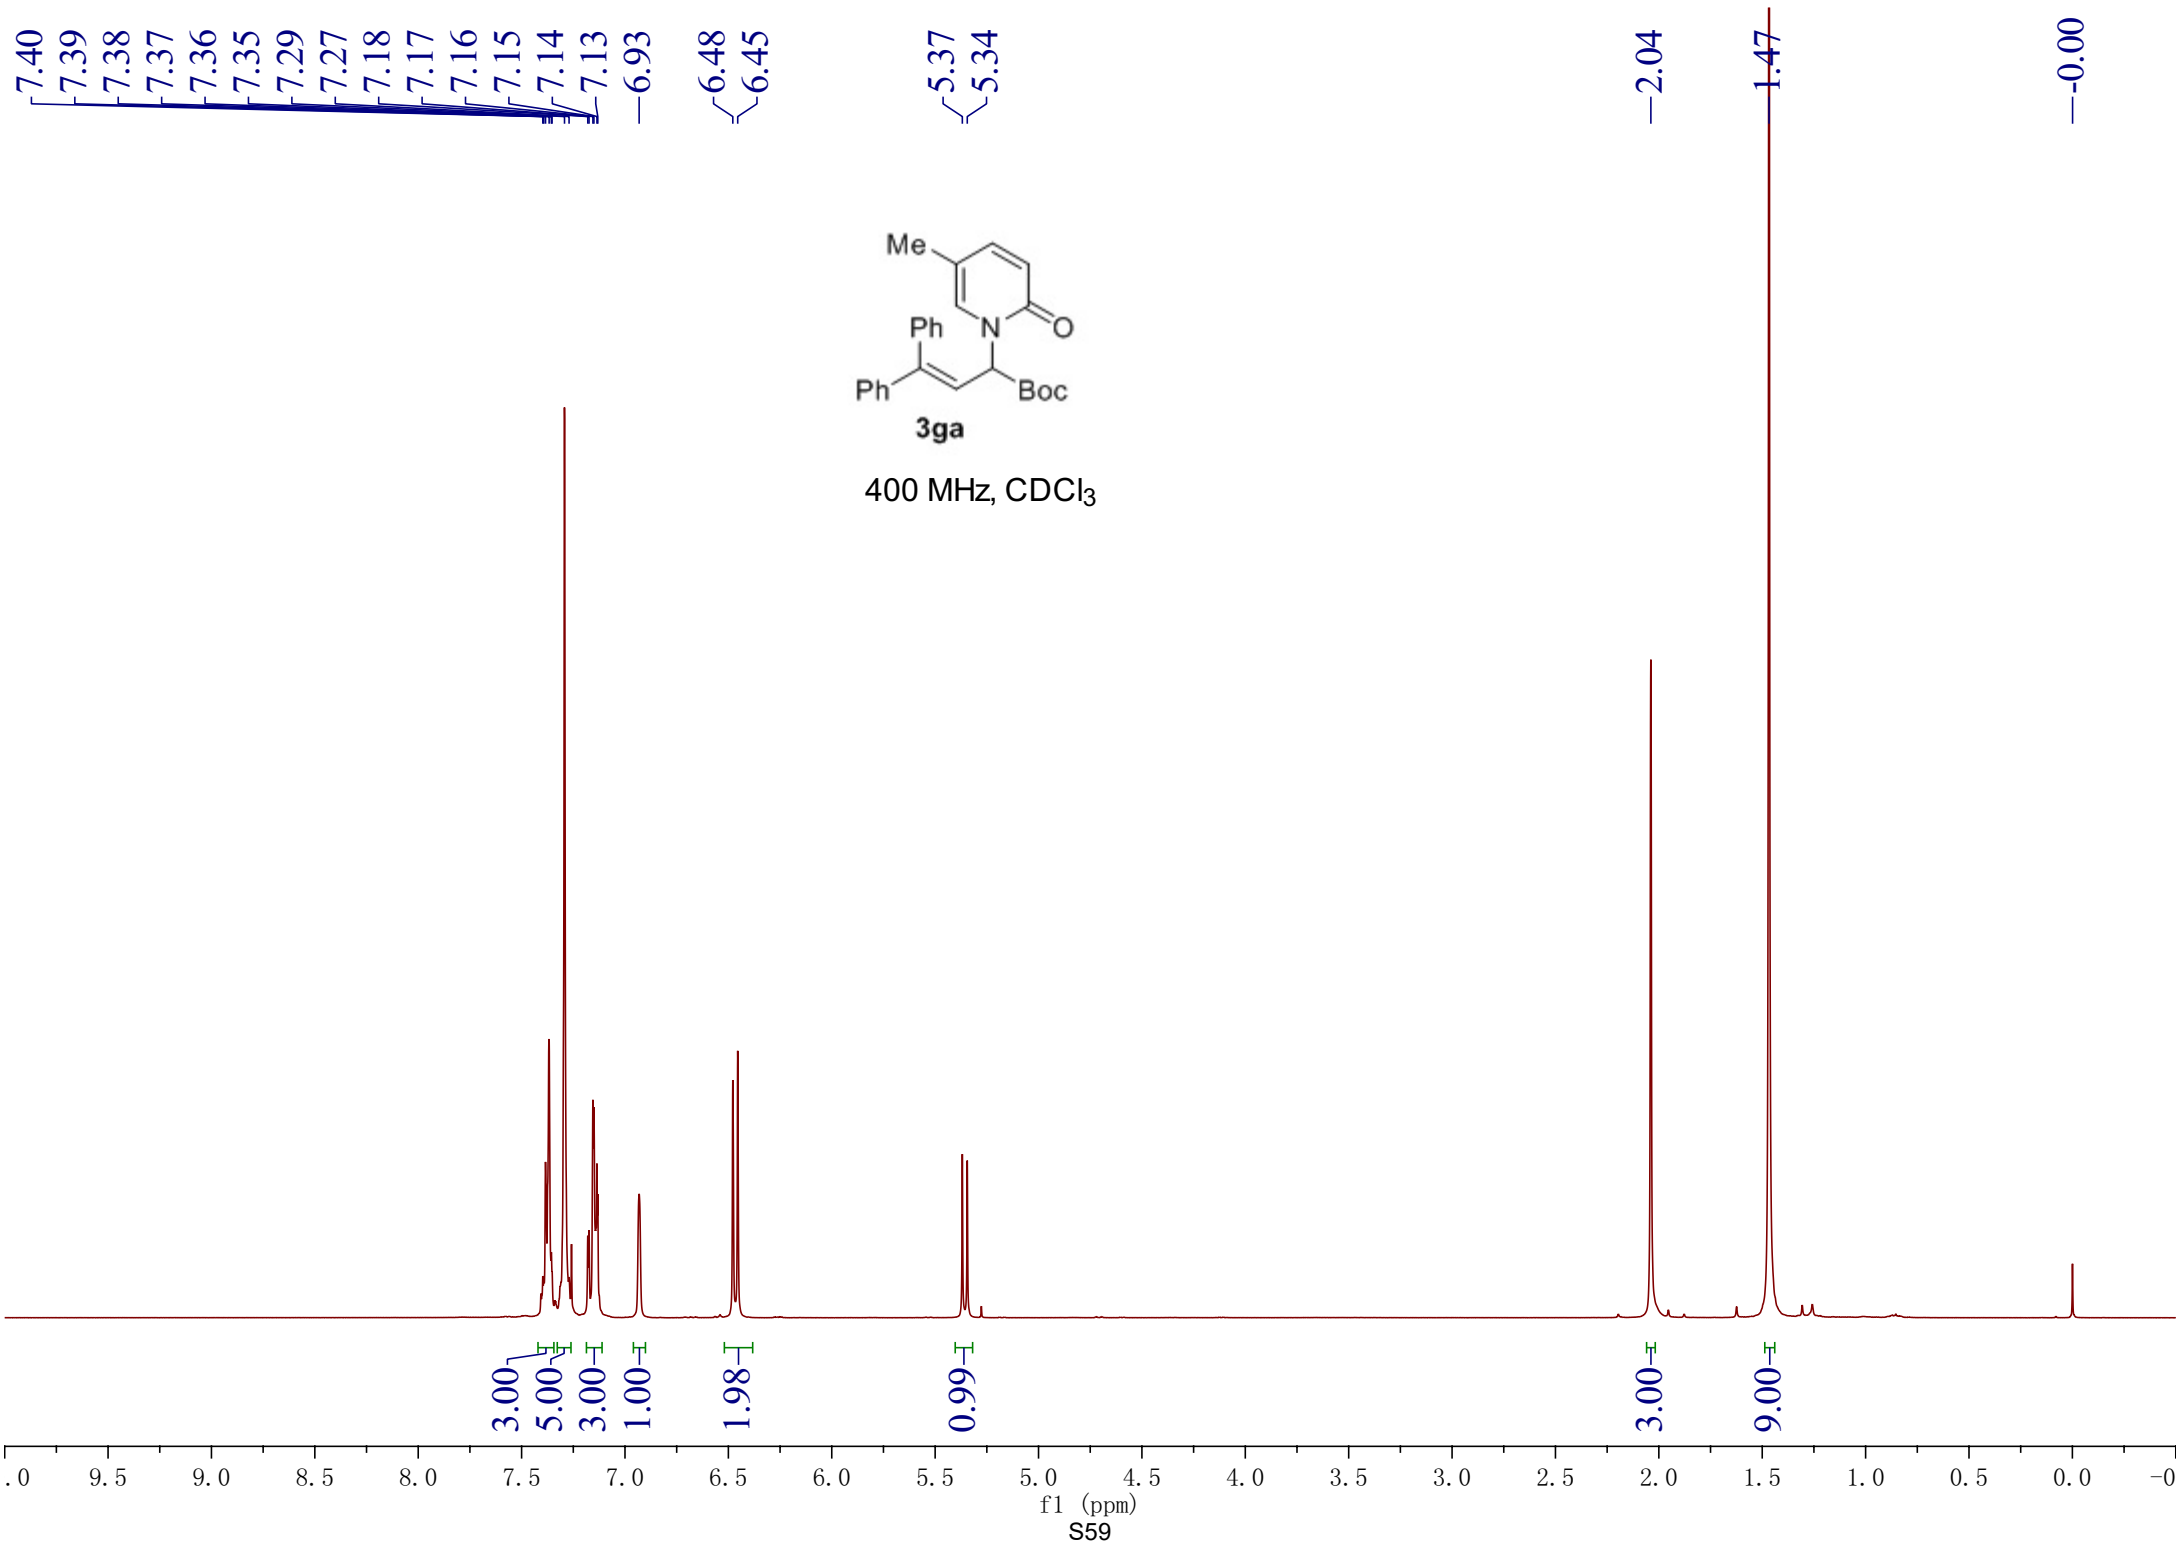

—168.36  
—161.27  
—149.06  
—142.24  
—140.94  
—138.29  
—133.58  
—129.38  
—128.65  
—128.37  
—128.34  
—128.14  
—127.69  
—120.41  
—120.37  
—114.55

—82.55

—61.37

—27.98

—17.32

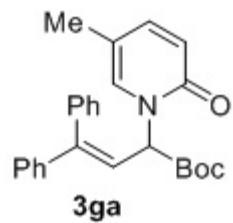

100 MHz, CDCl<sub>3</sub>

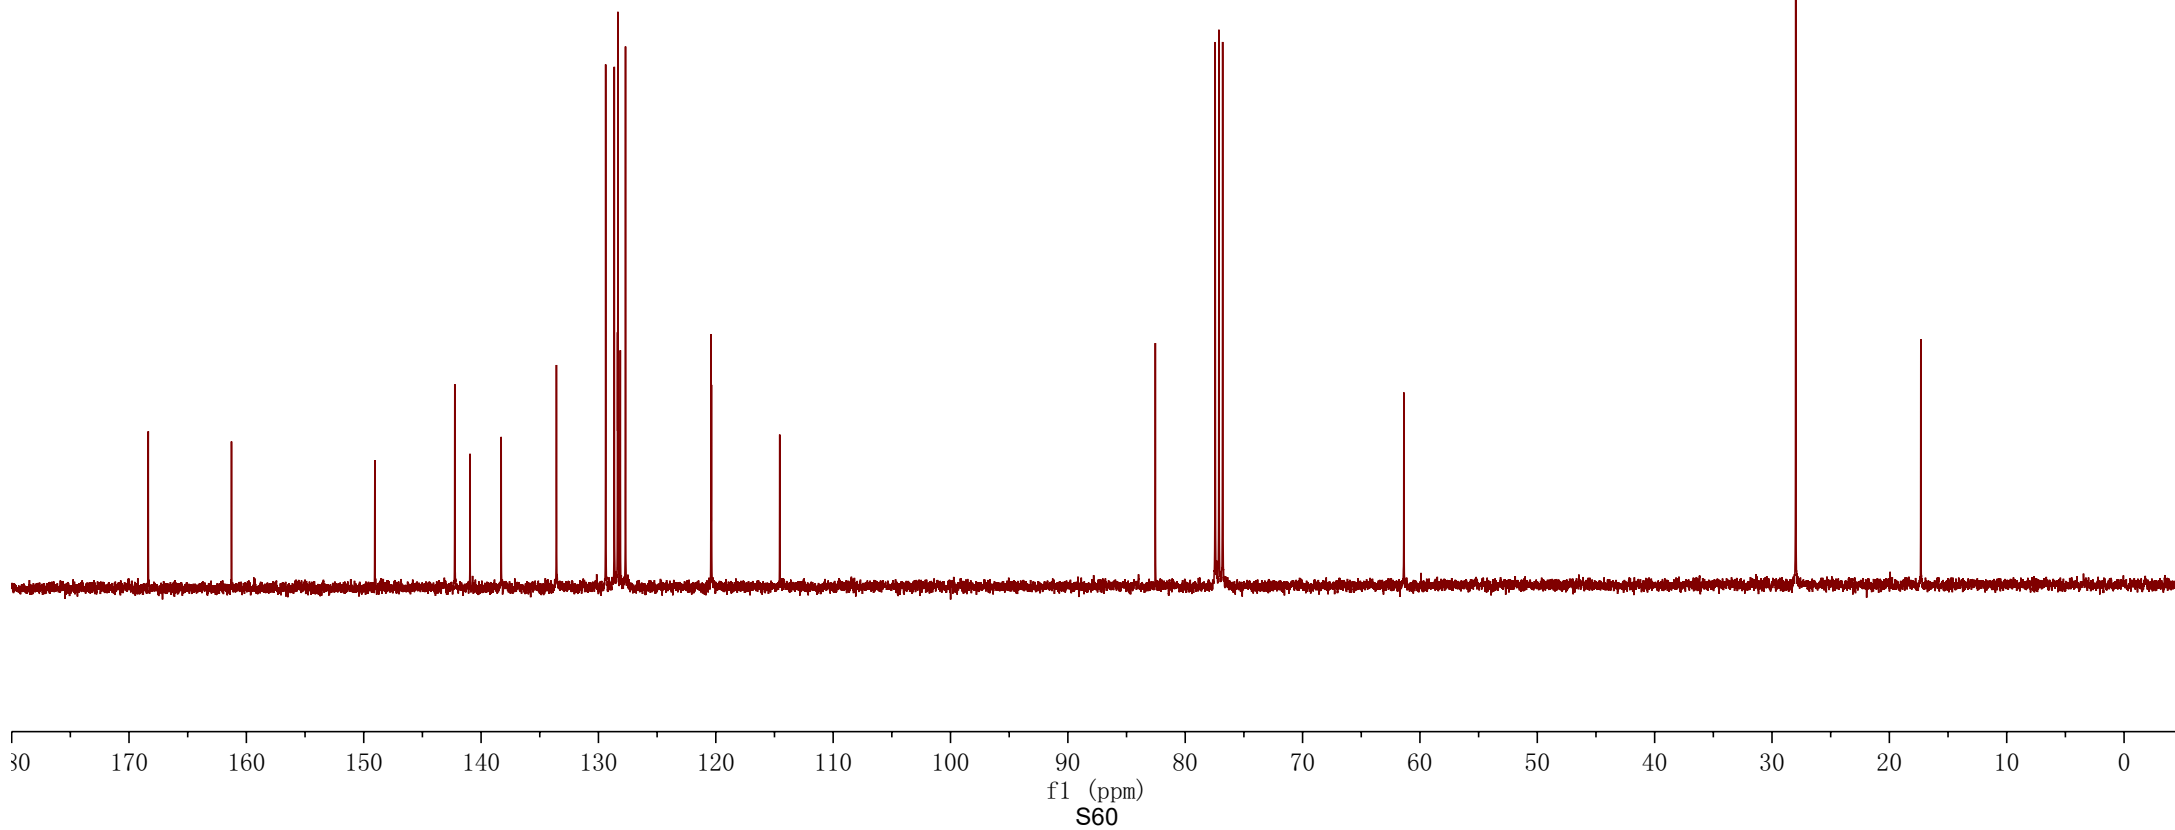

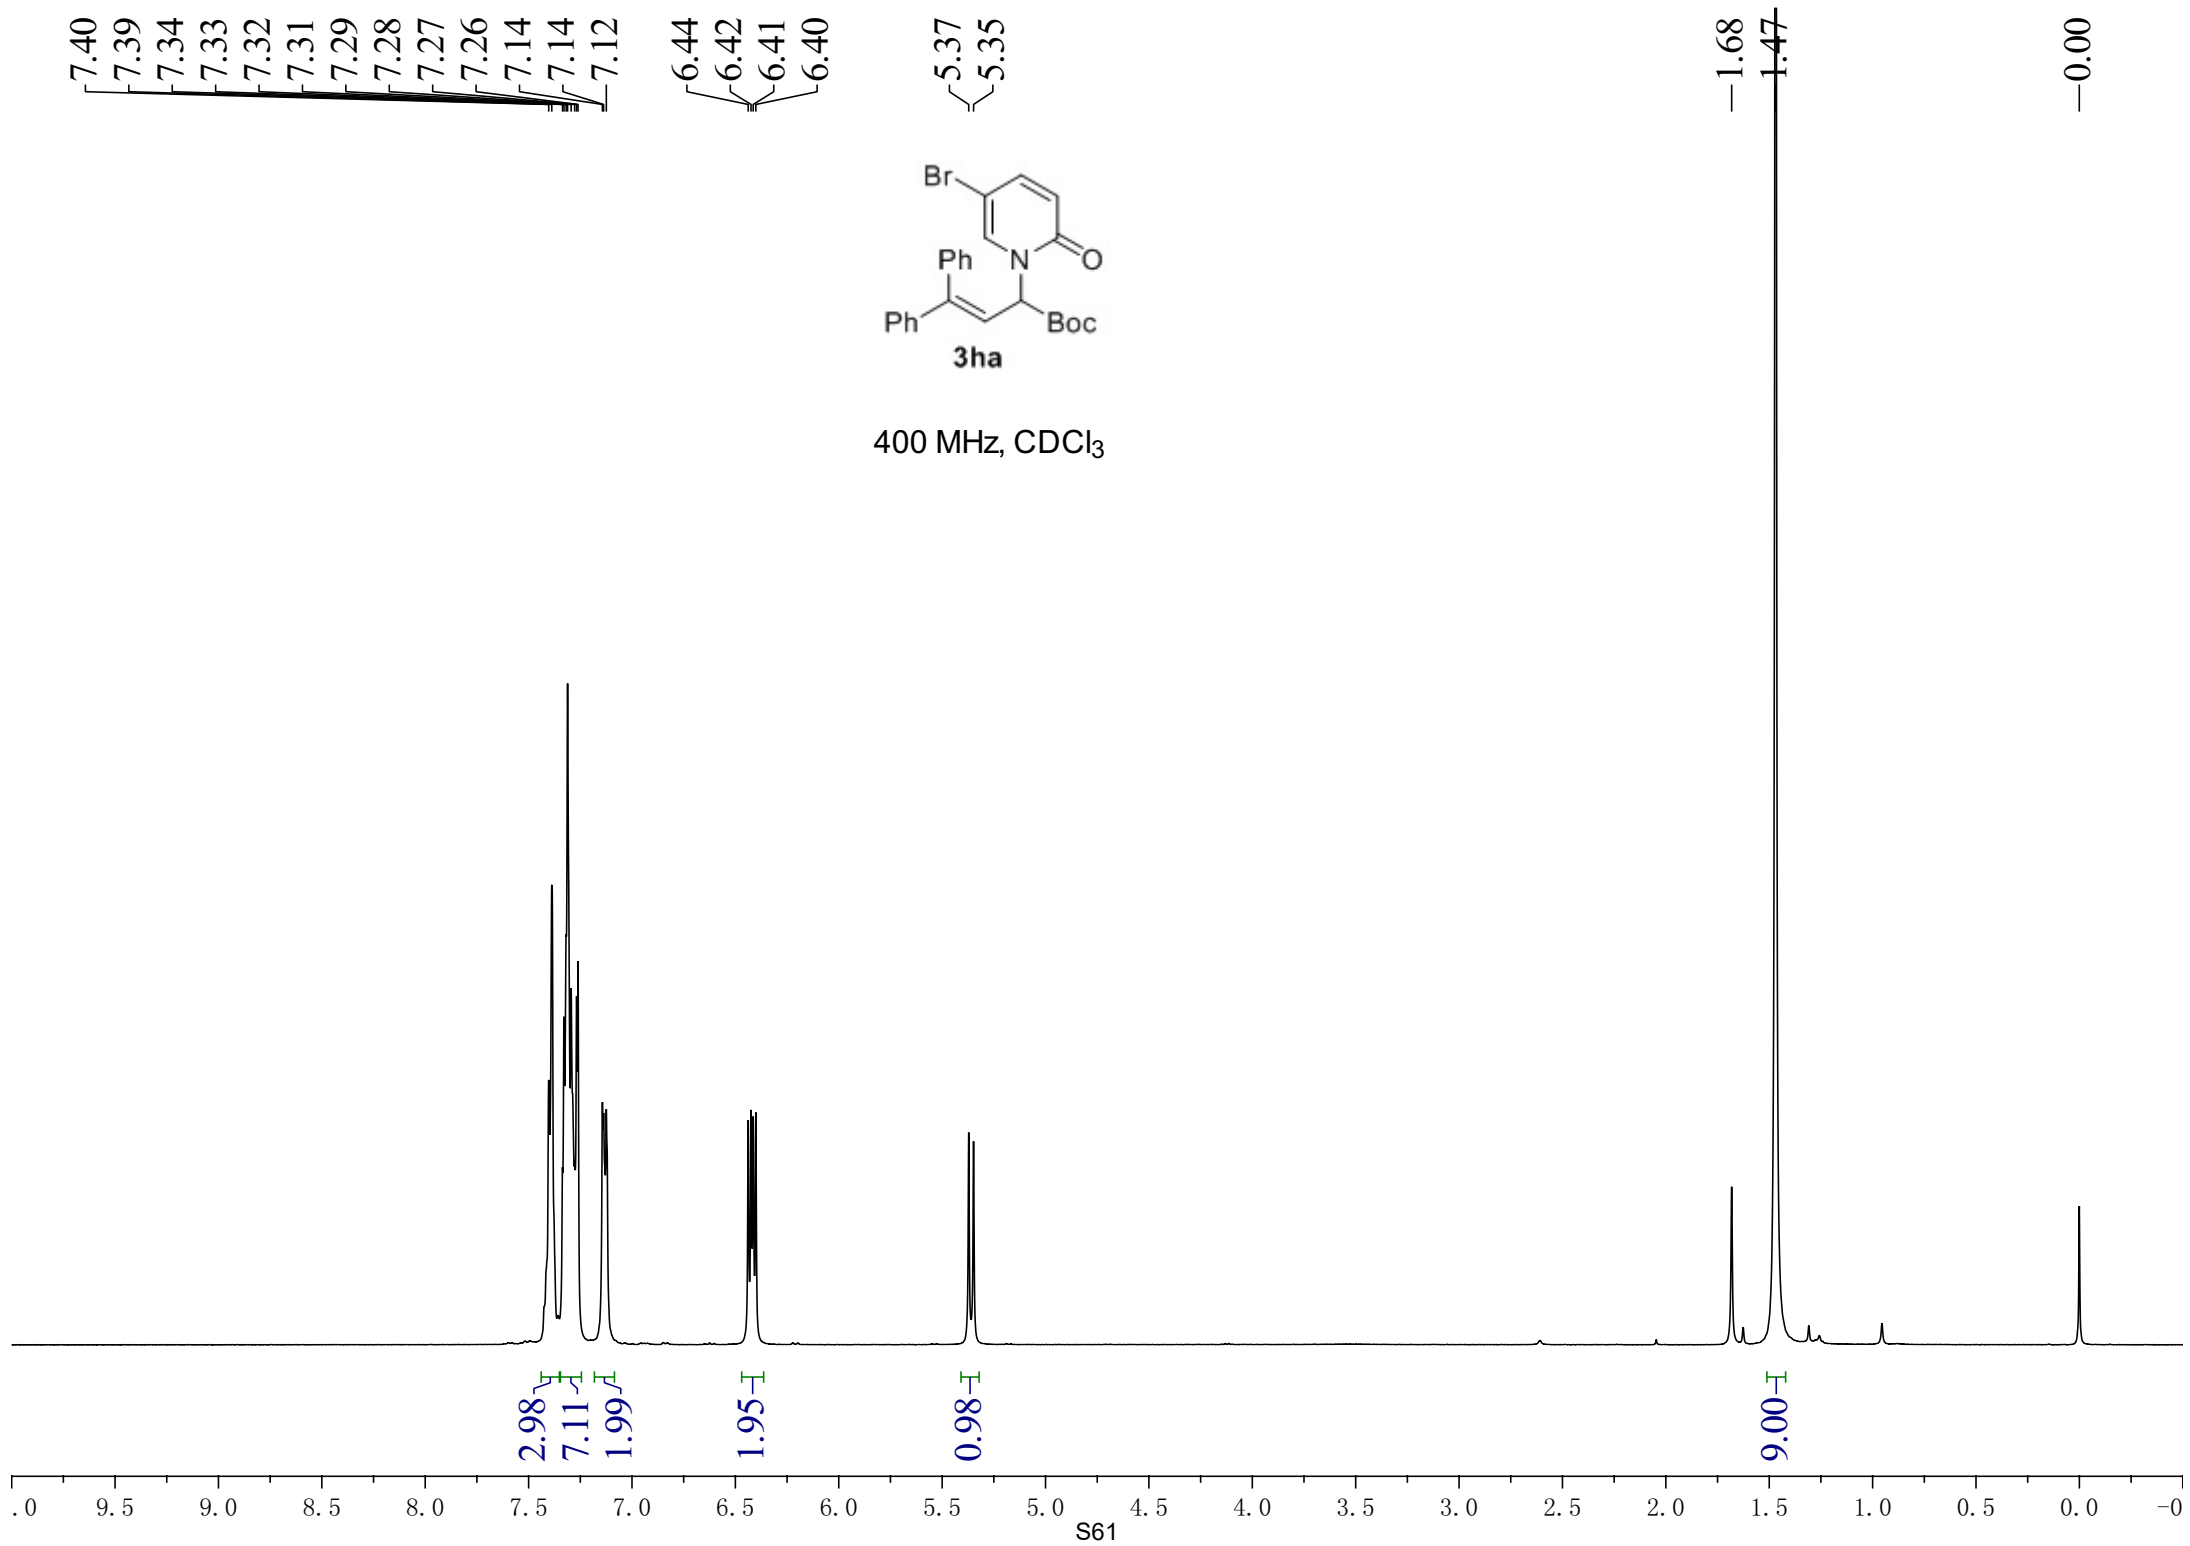

—167.84  
—160.48  
—150.25  
—142.67  
—140.65  
—138.09  
—136.26  
—129.30  
—128.88  
—128.72  
—128.51  
—128.43  
—127.78  
—122.00  
—119.36

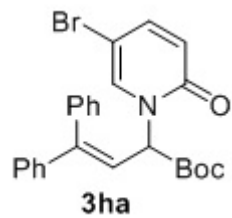

100 MHz, CDCl<sub>3</sub>

—97.77

—83.13

—61.52

—28.04

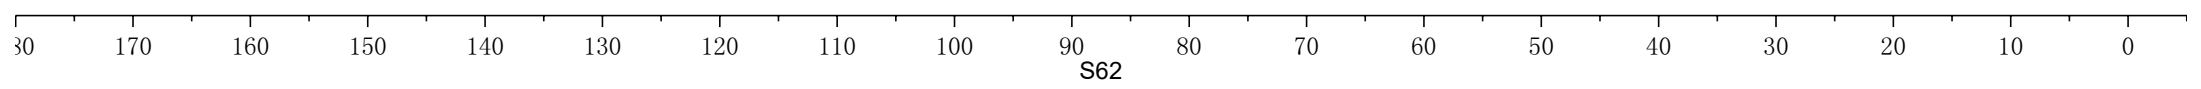



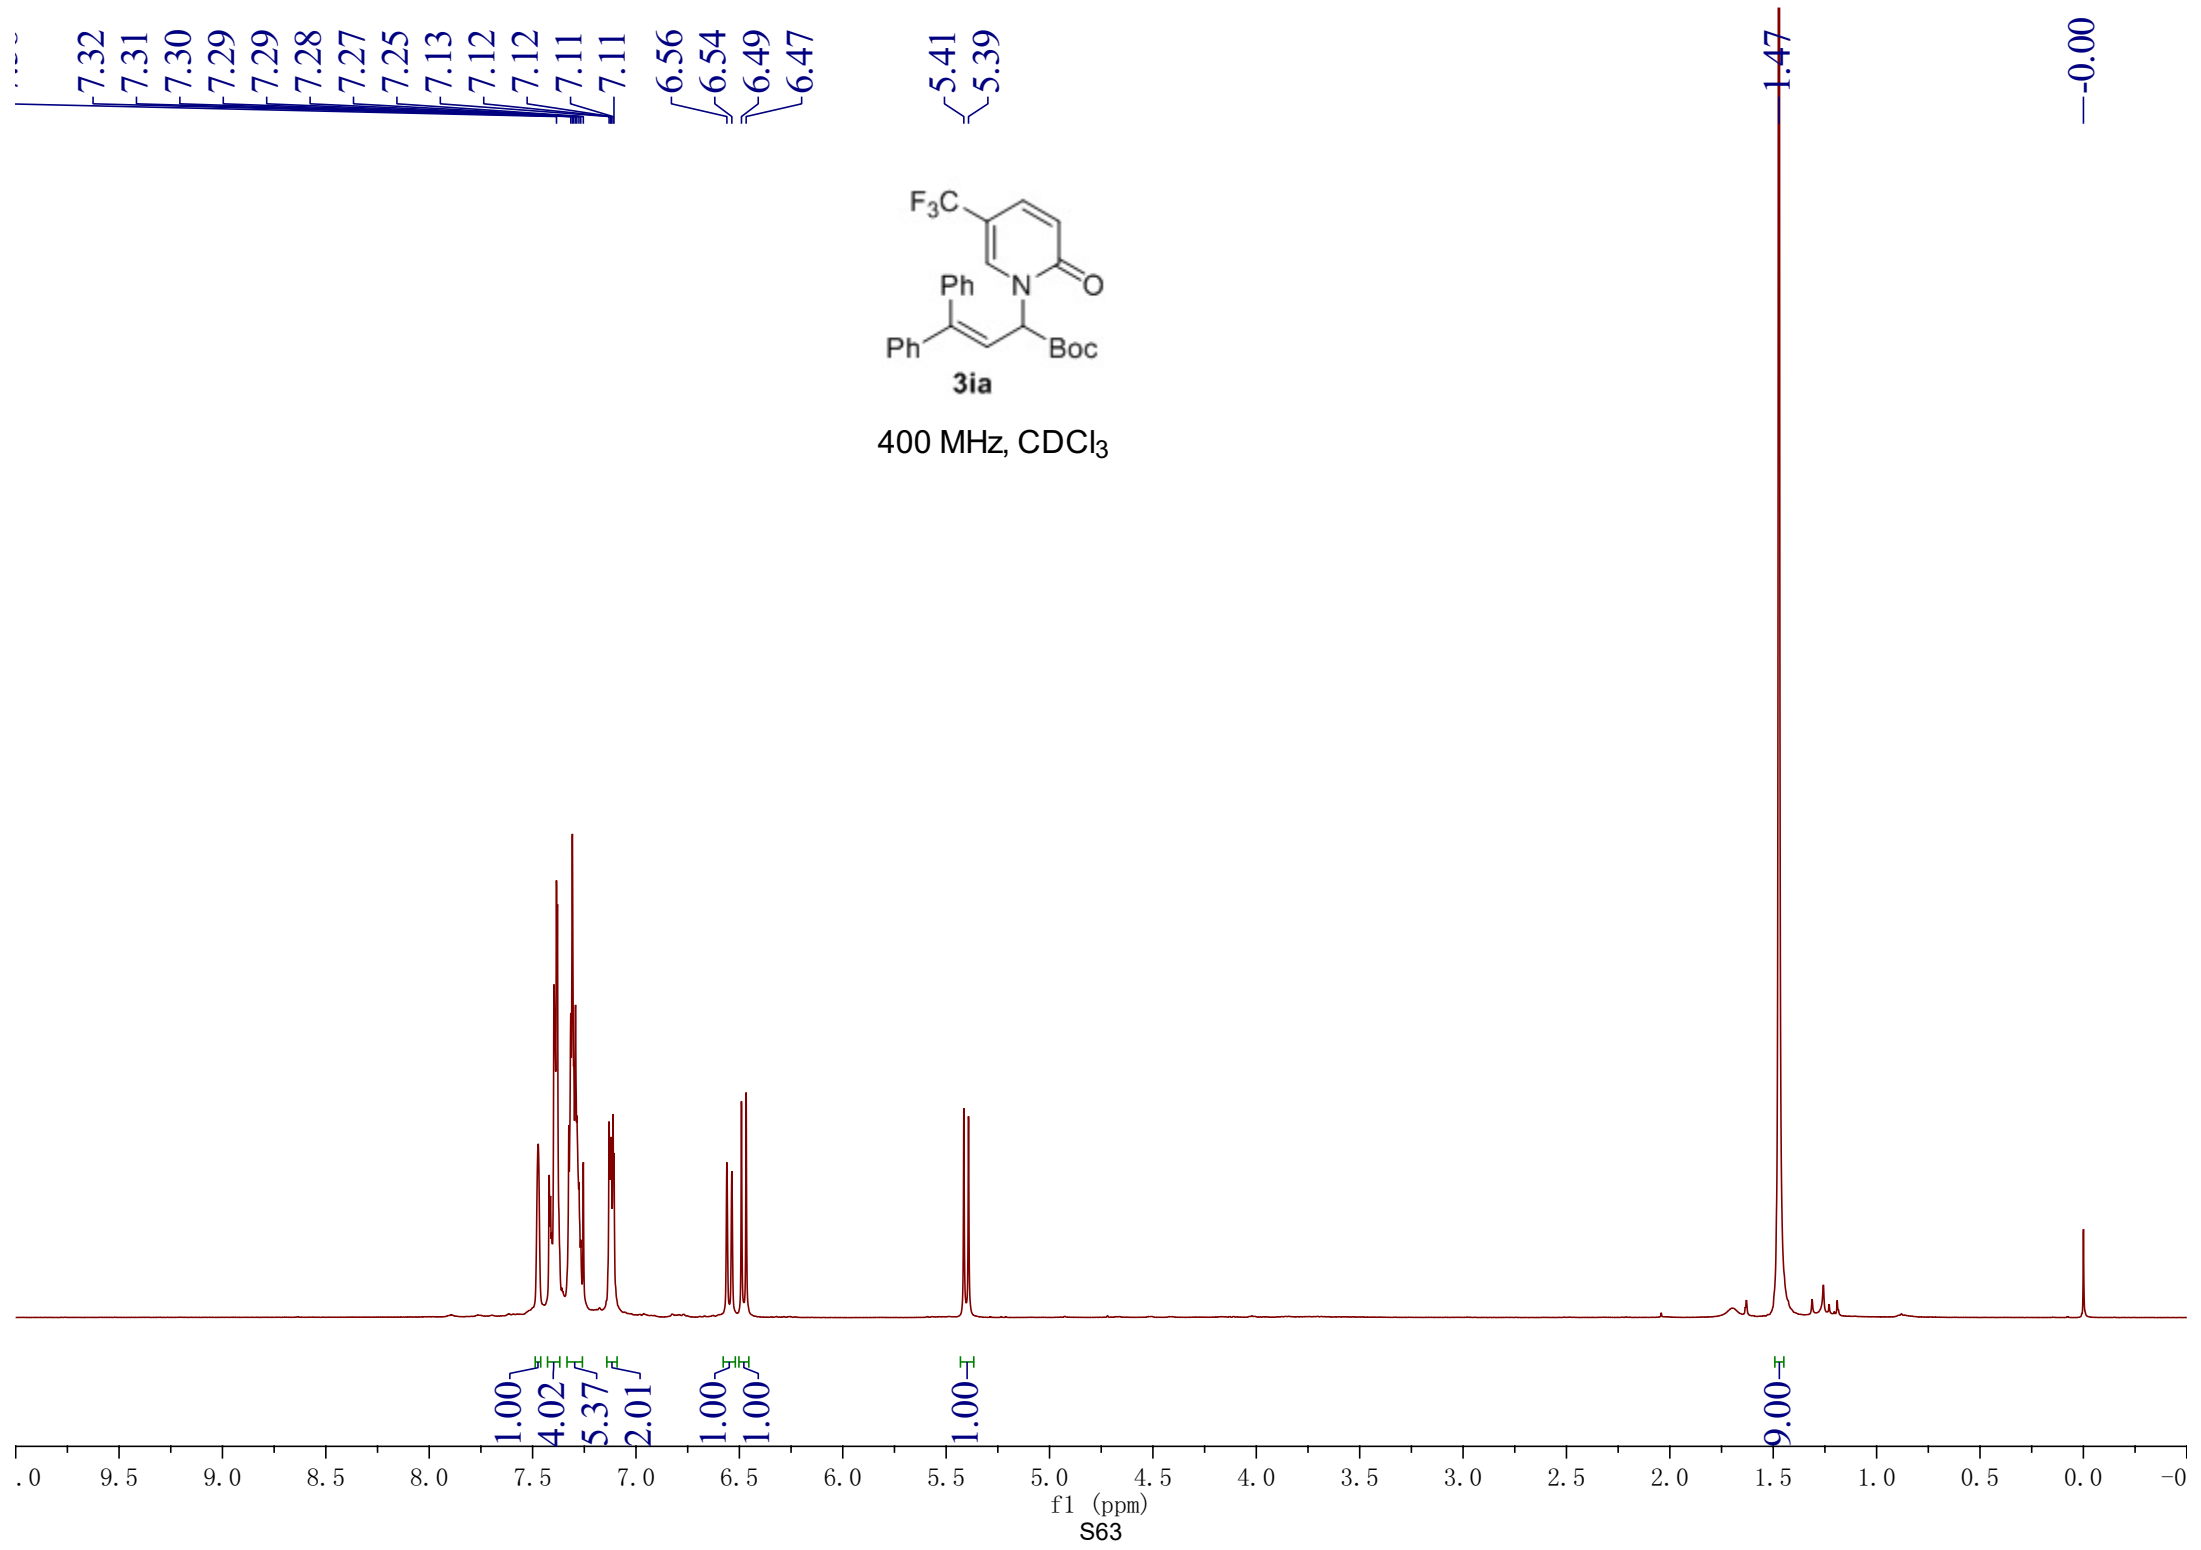

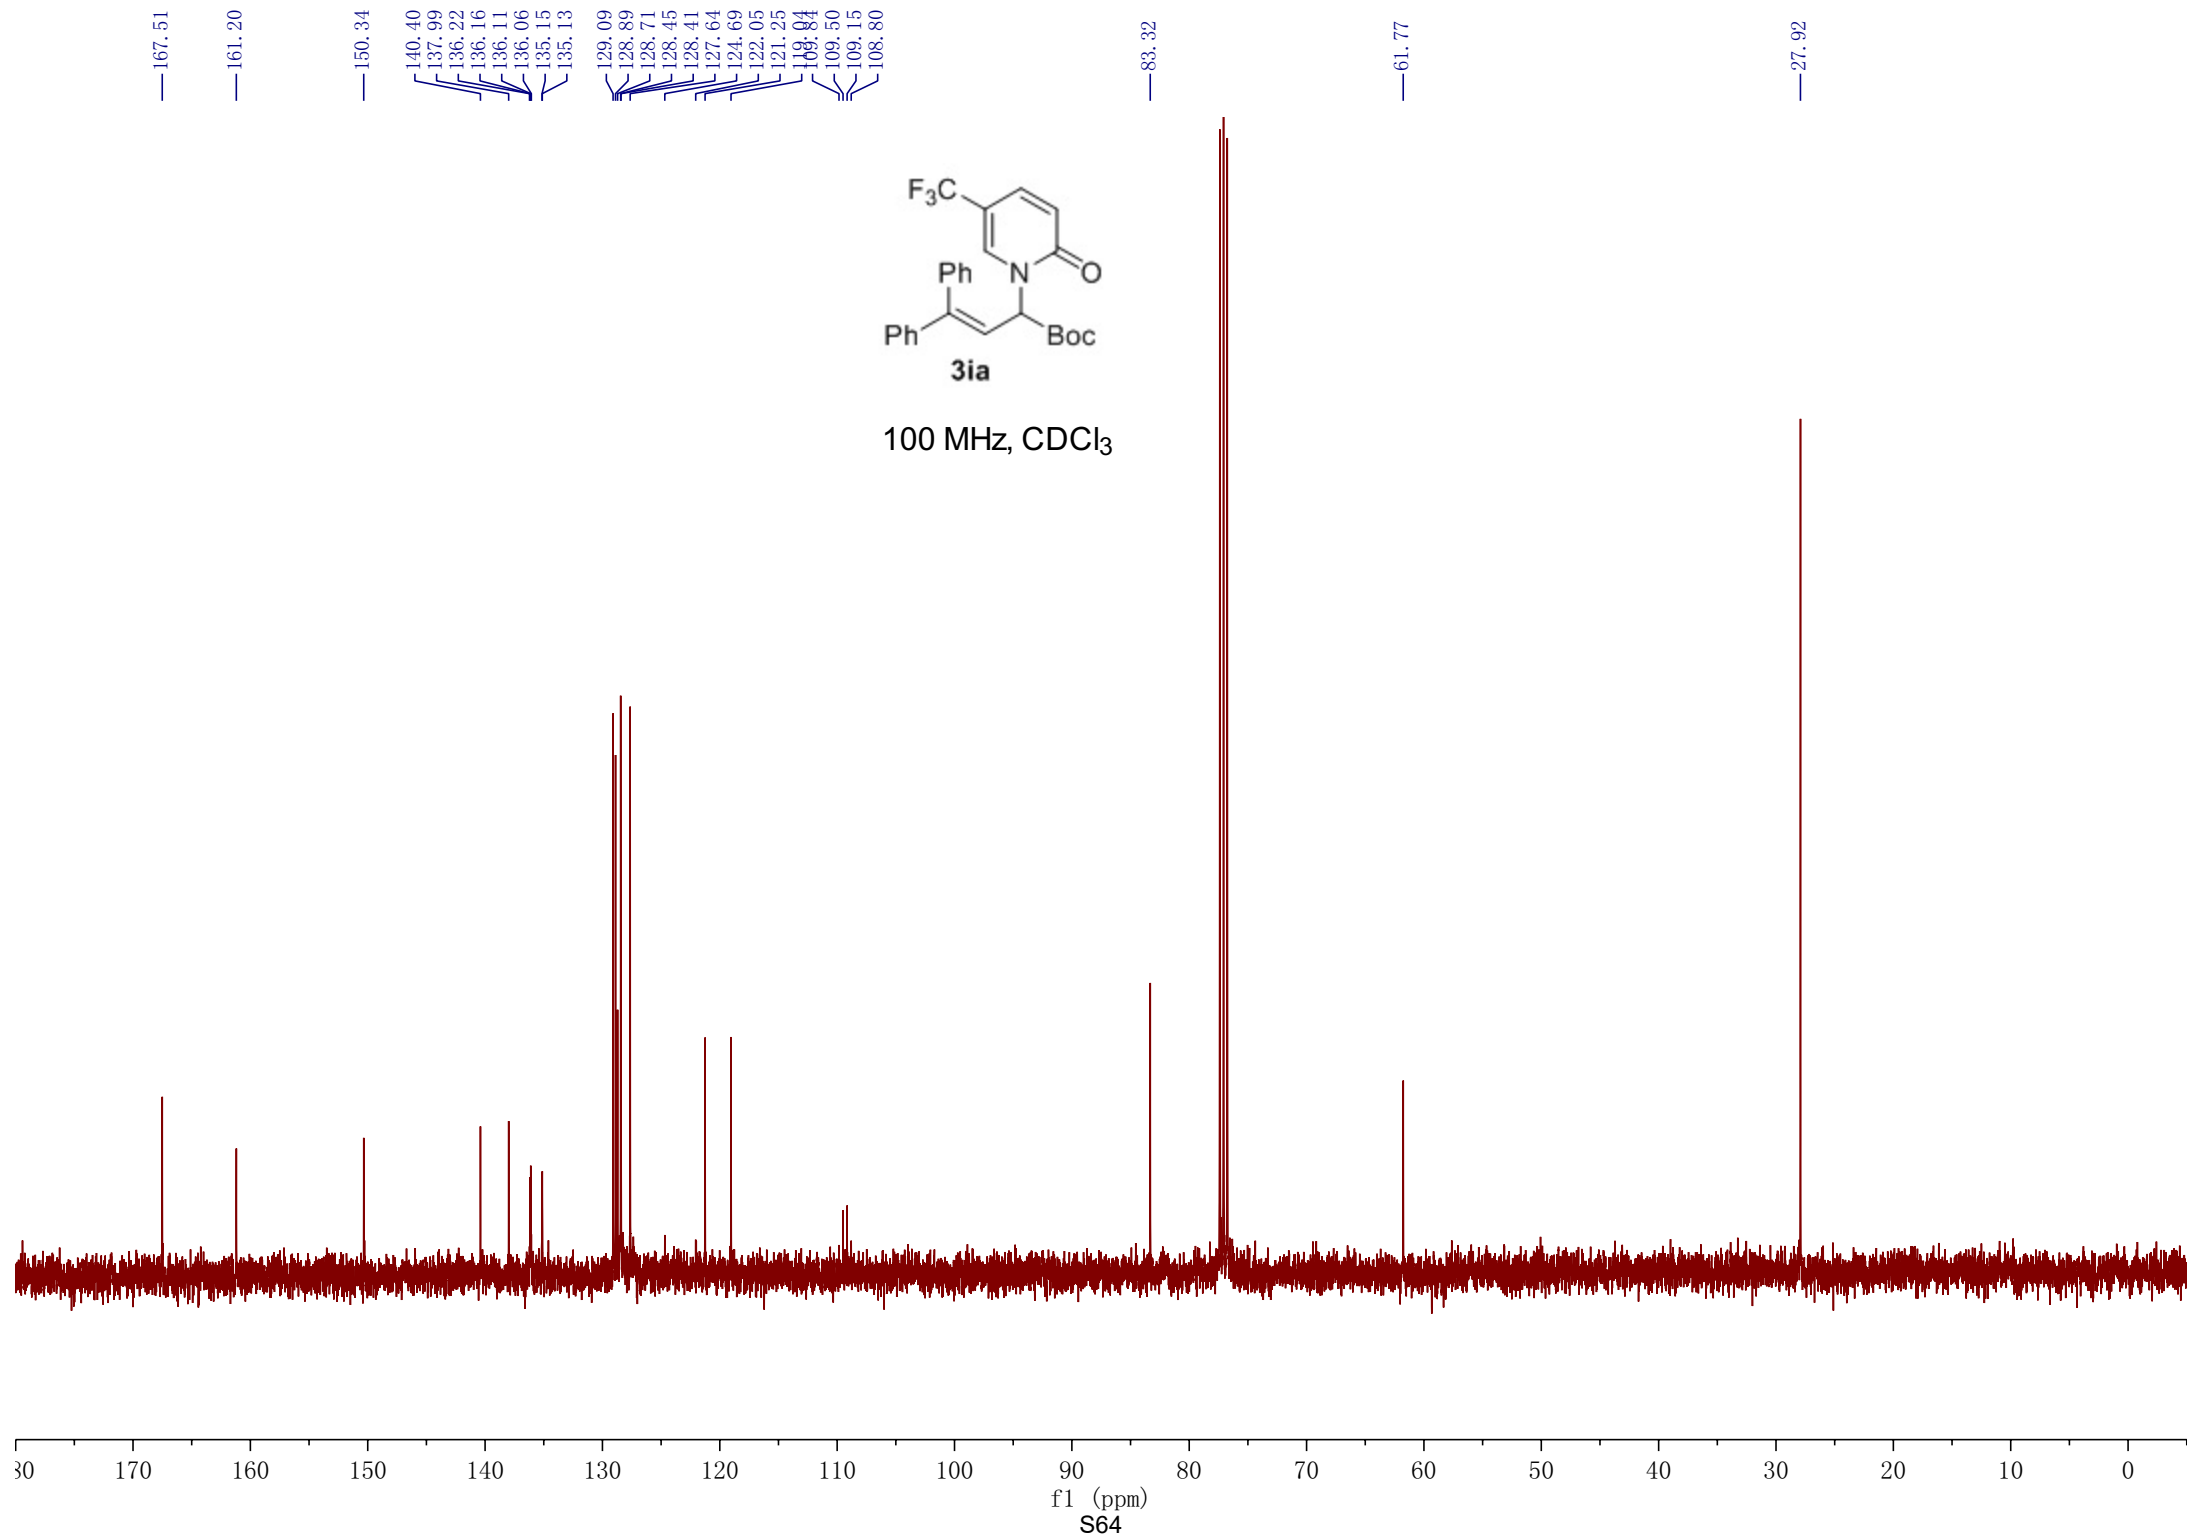

--62.30

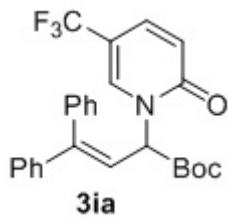

282 MHz, CDCl<sub>3</sub>

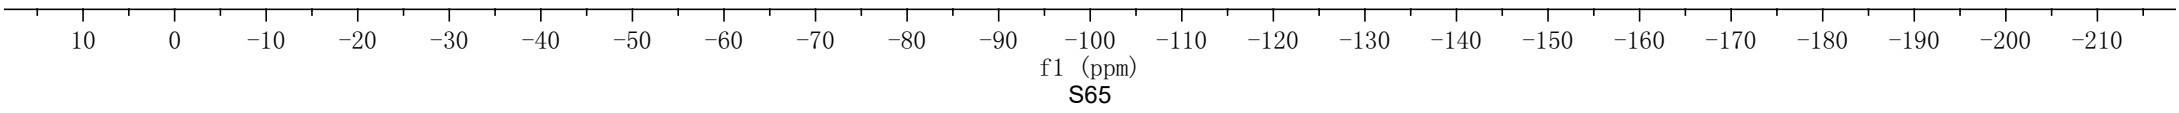

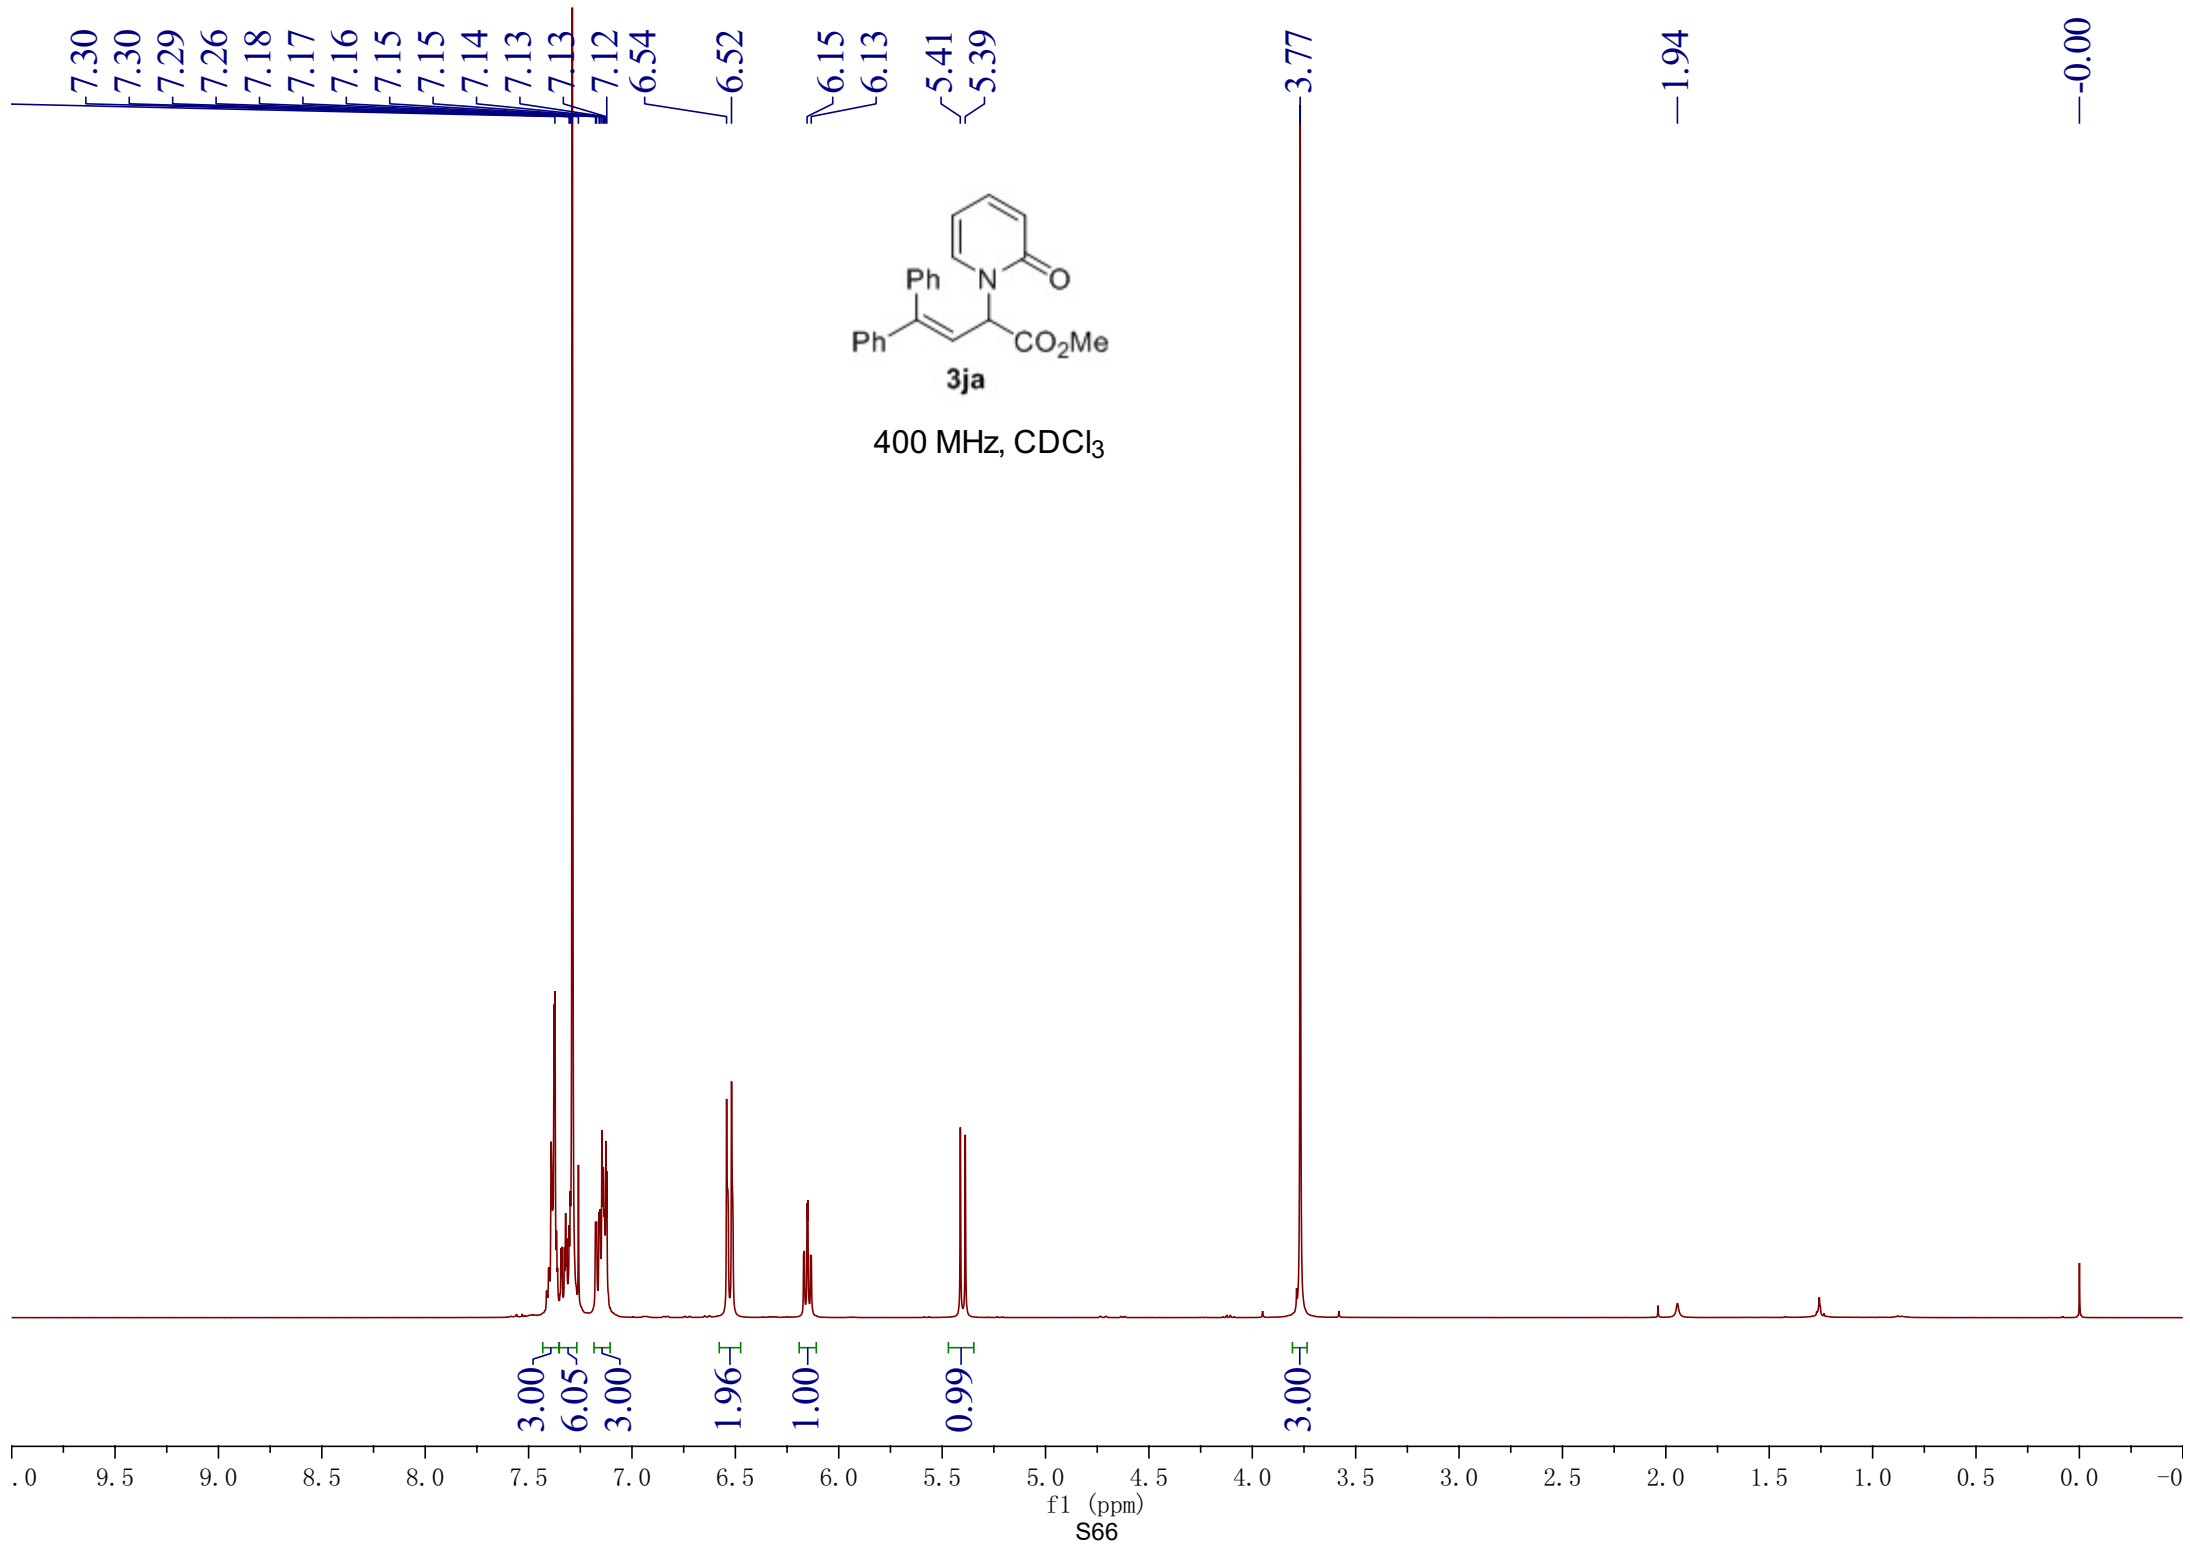

—169.67  
—162.03  
—149.79  
139.82  
136.13  
129.26  
128.82  
128.58  
128.37  
128.32  
127.69  
120.97  
119.38  
106.11

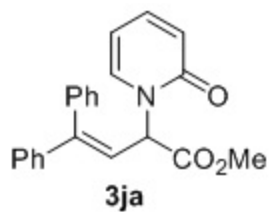

100 MHz, CDCl<sub>3</sub>

—61.07  
—52.97

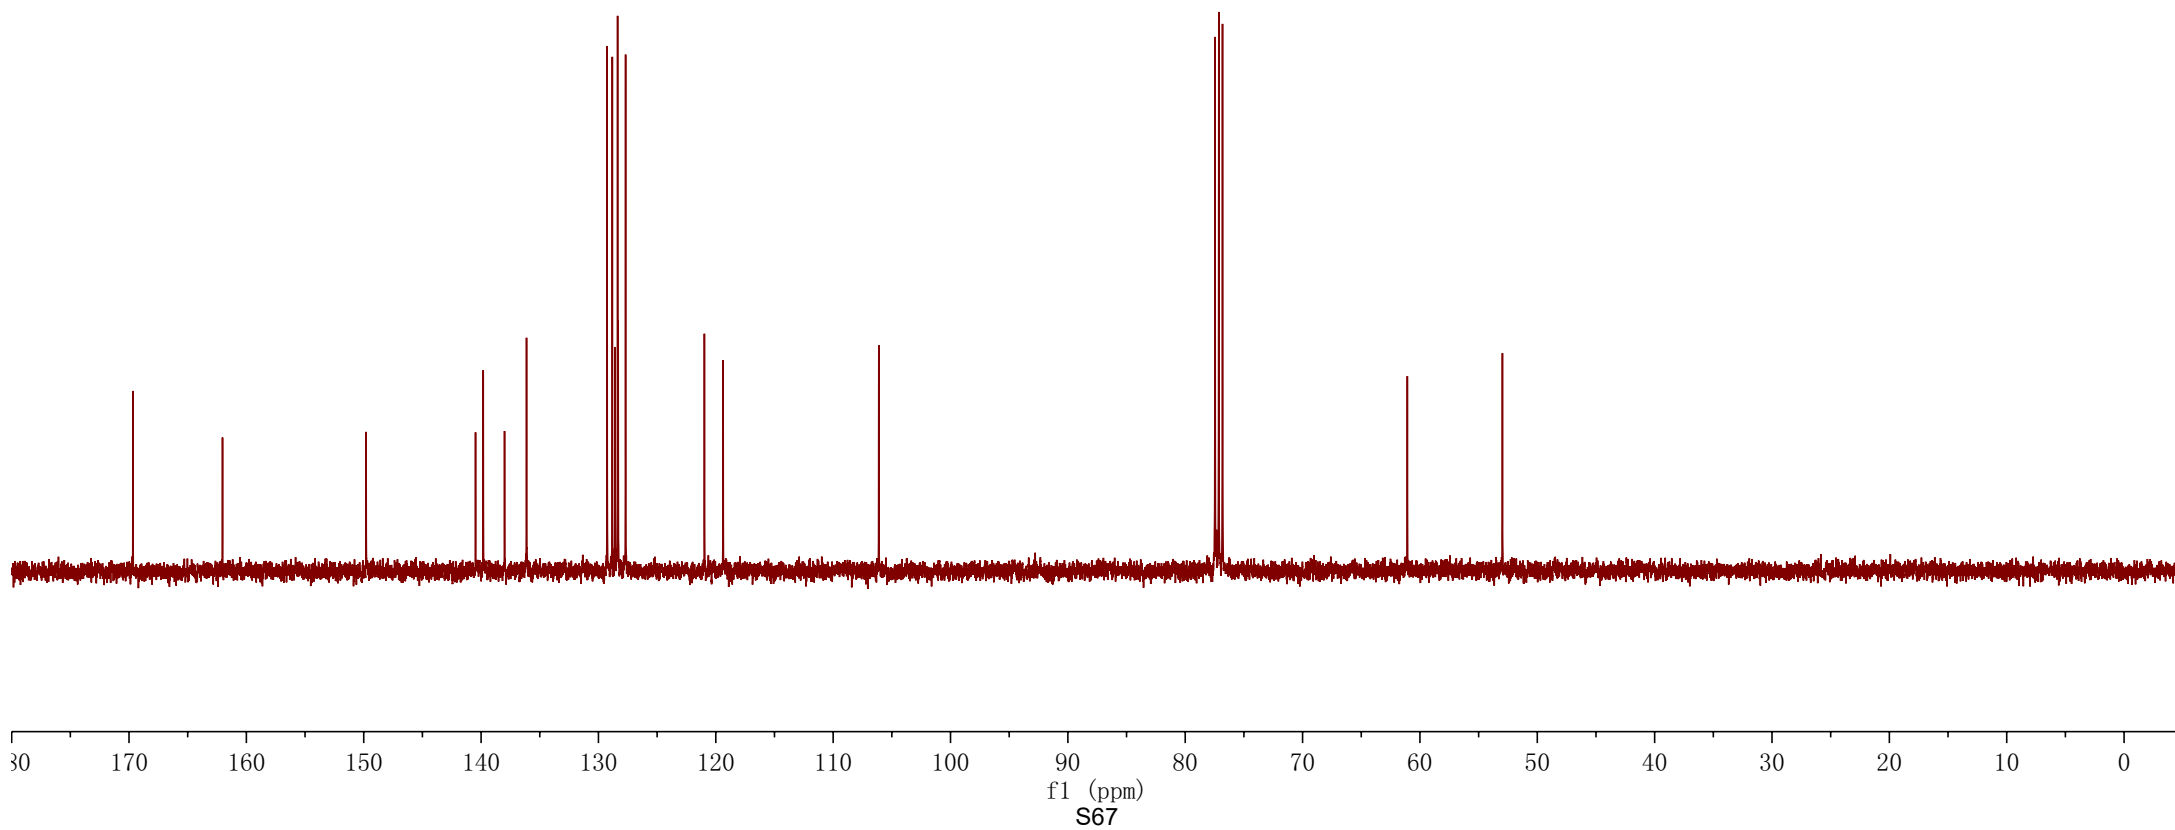

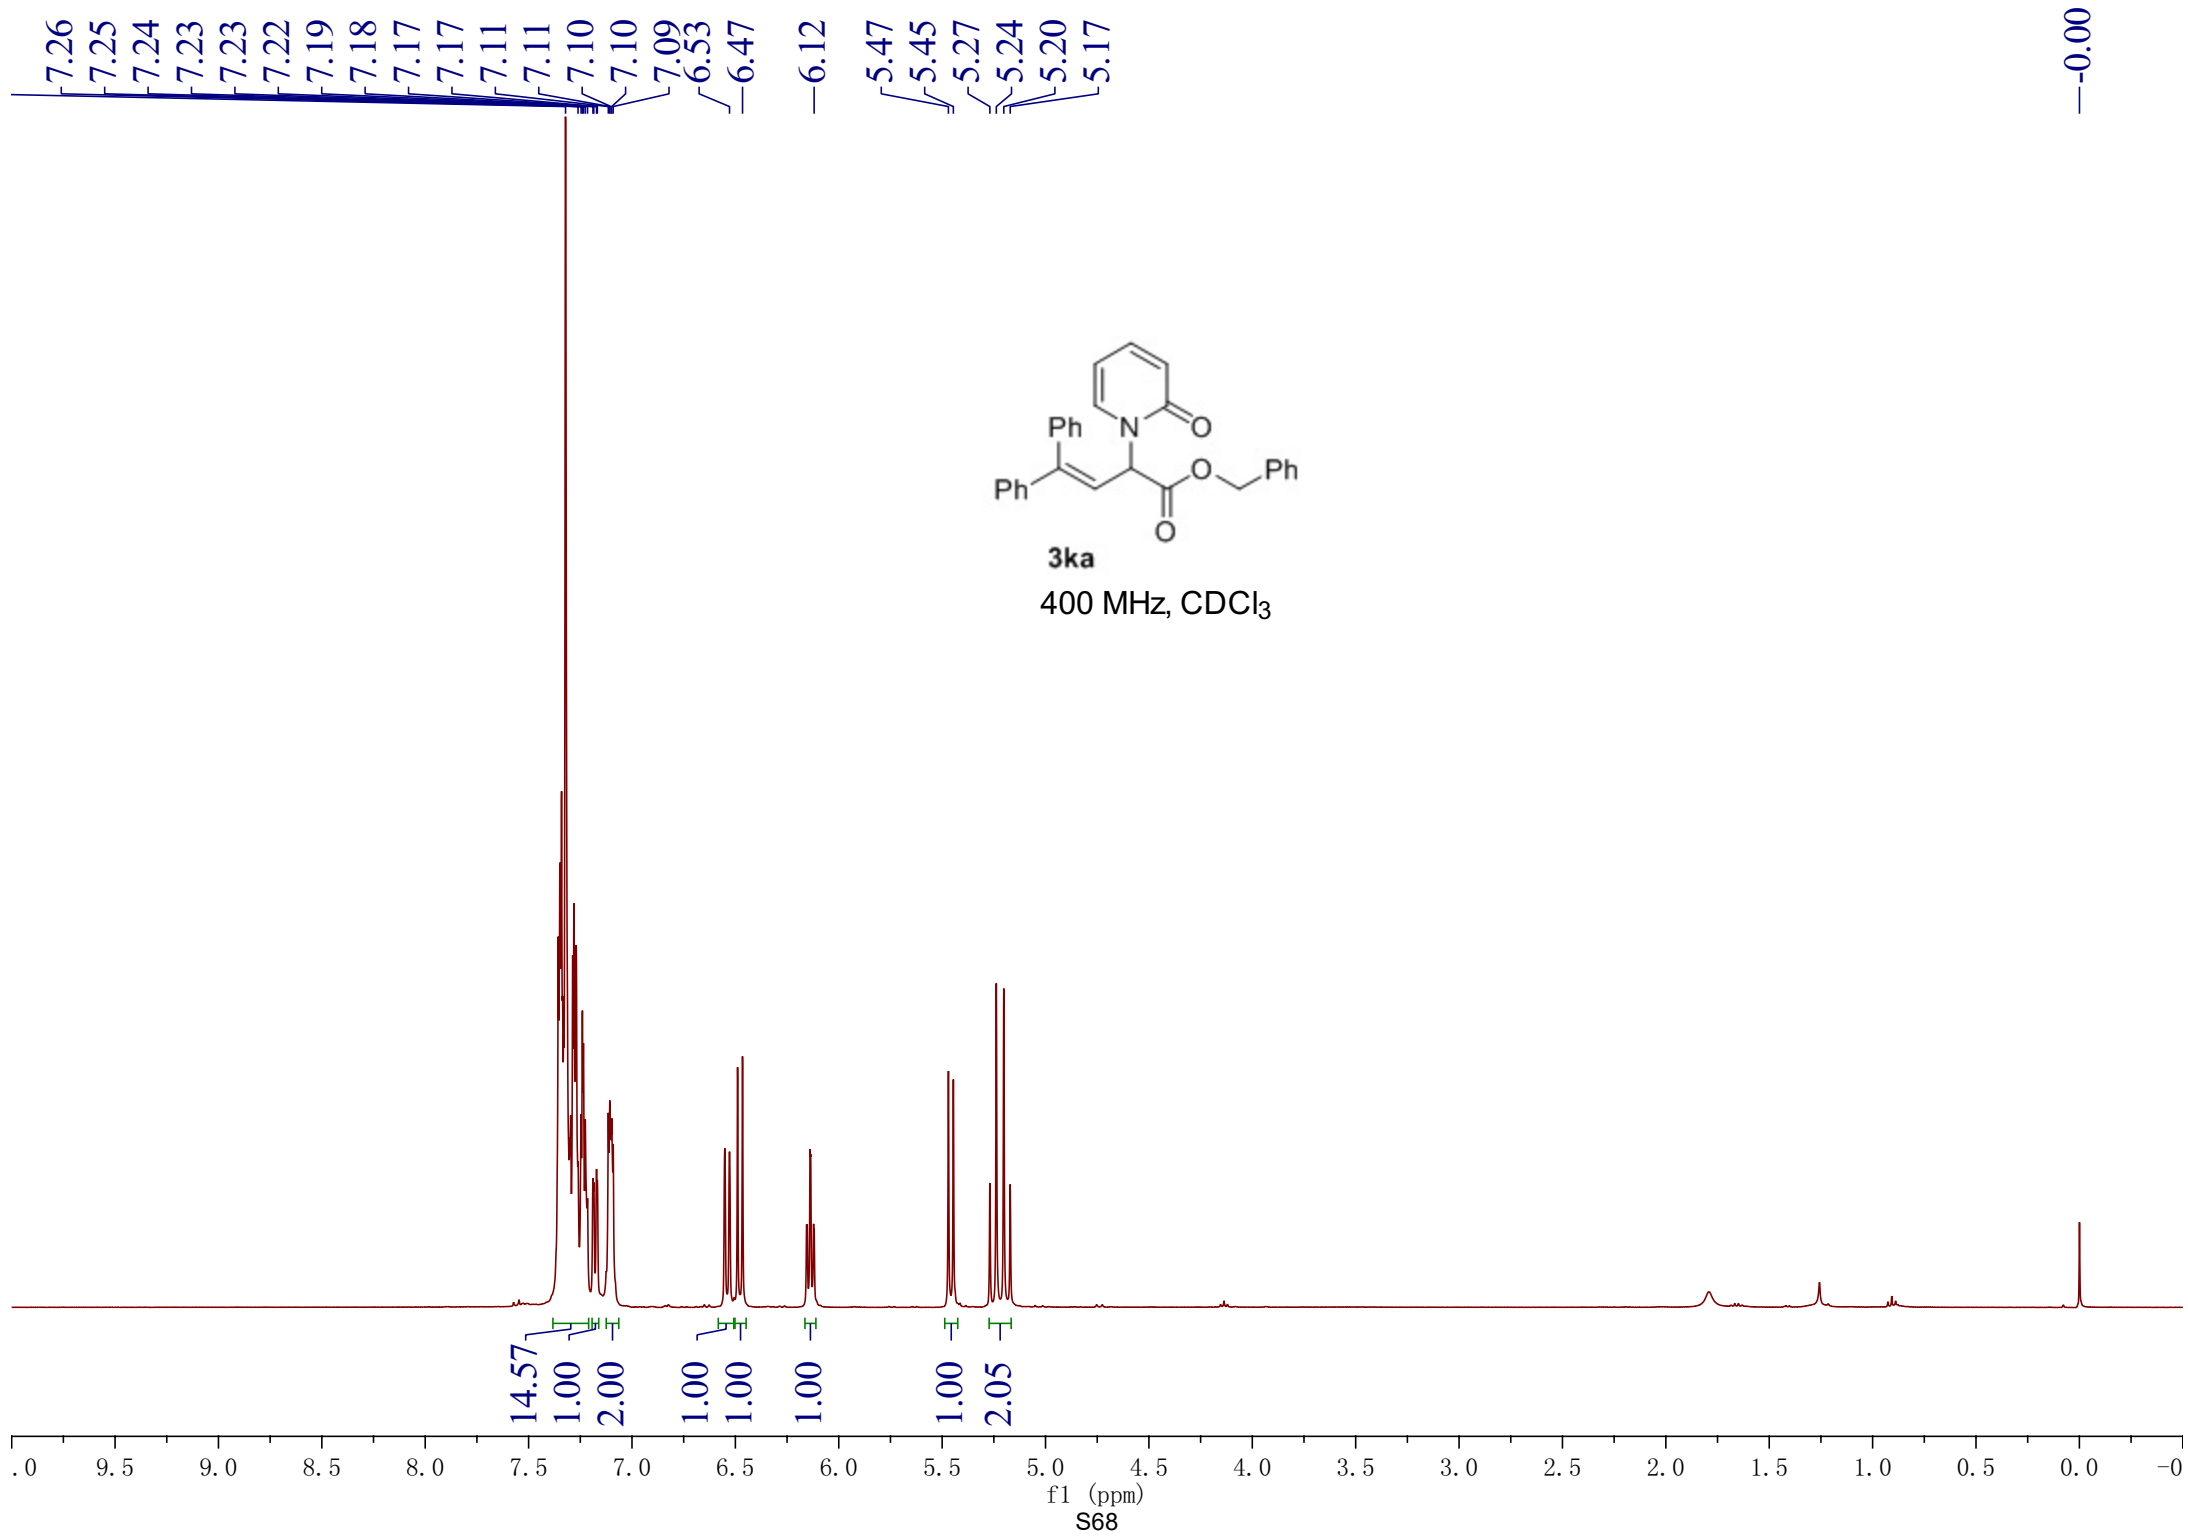

—168.97  
—162.07  
—149.97  
136.11  
129.27  
128.79  
128.55  
128.36  
128.31  
128.27  
128.05  
127.72  
126.95  
106.08

—67.44  
—61.24

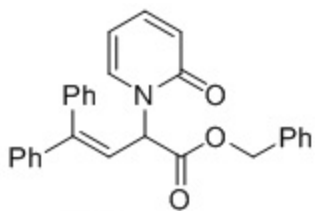

**3ka**

100 MHz, CDCl<sub>3</sub>

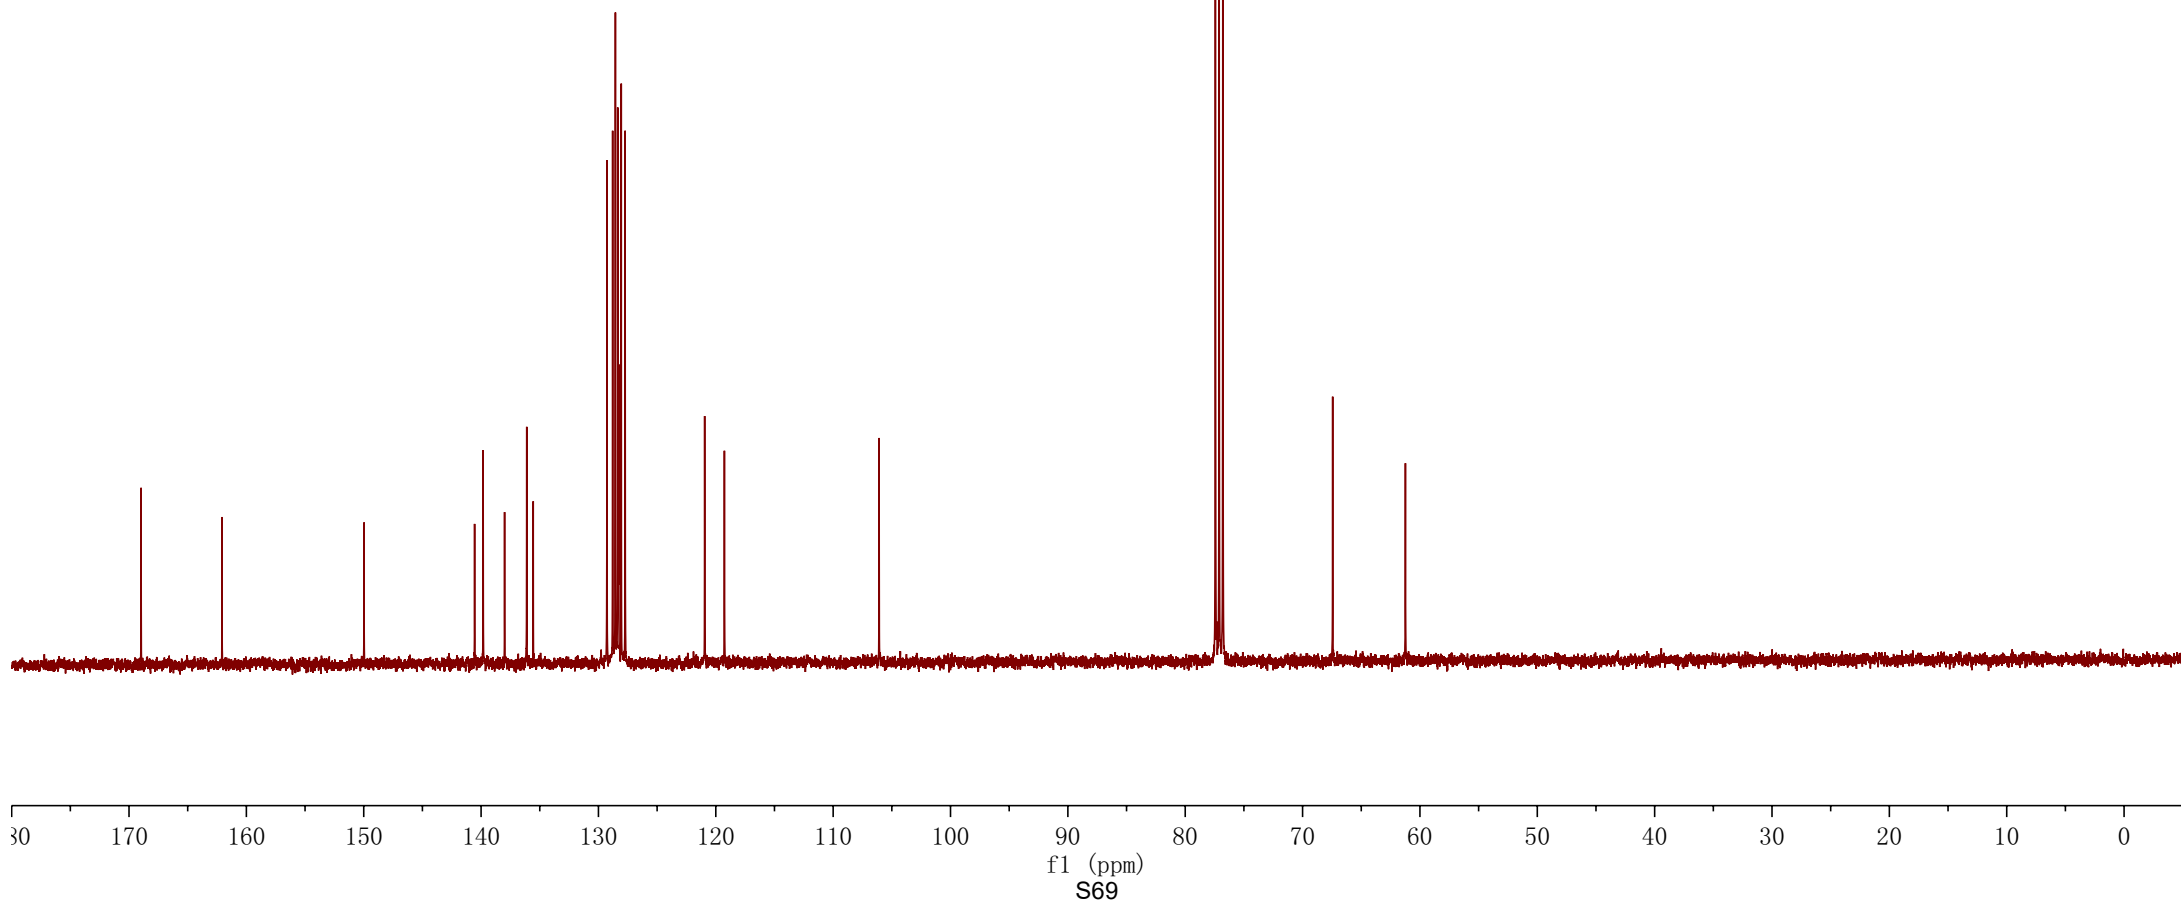

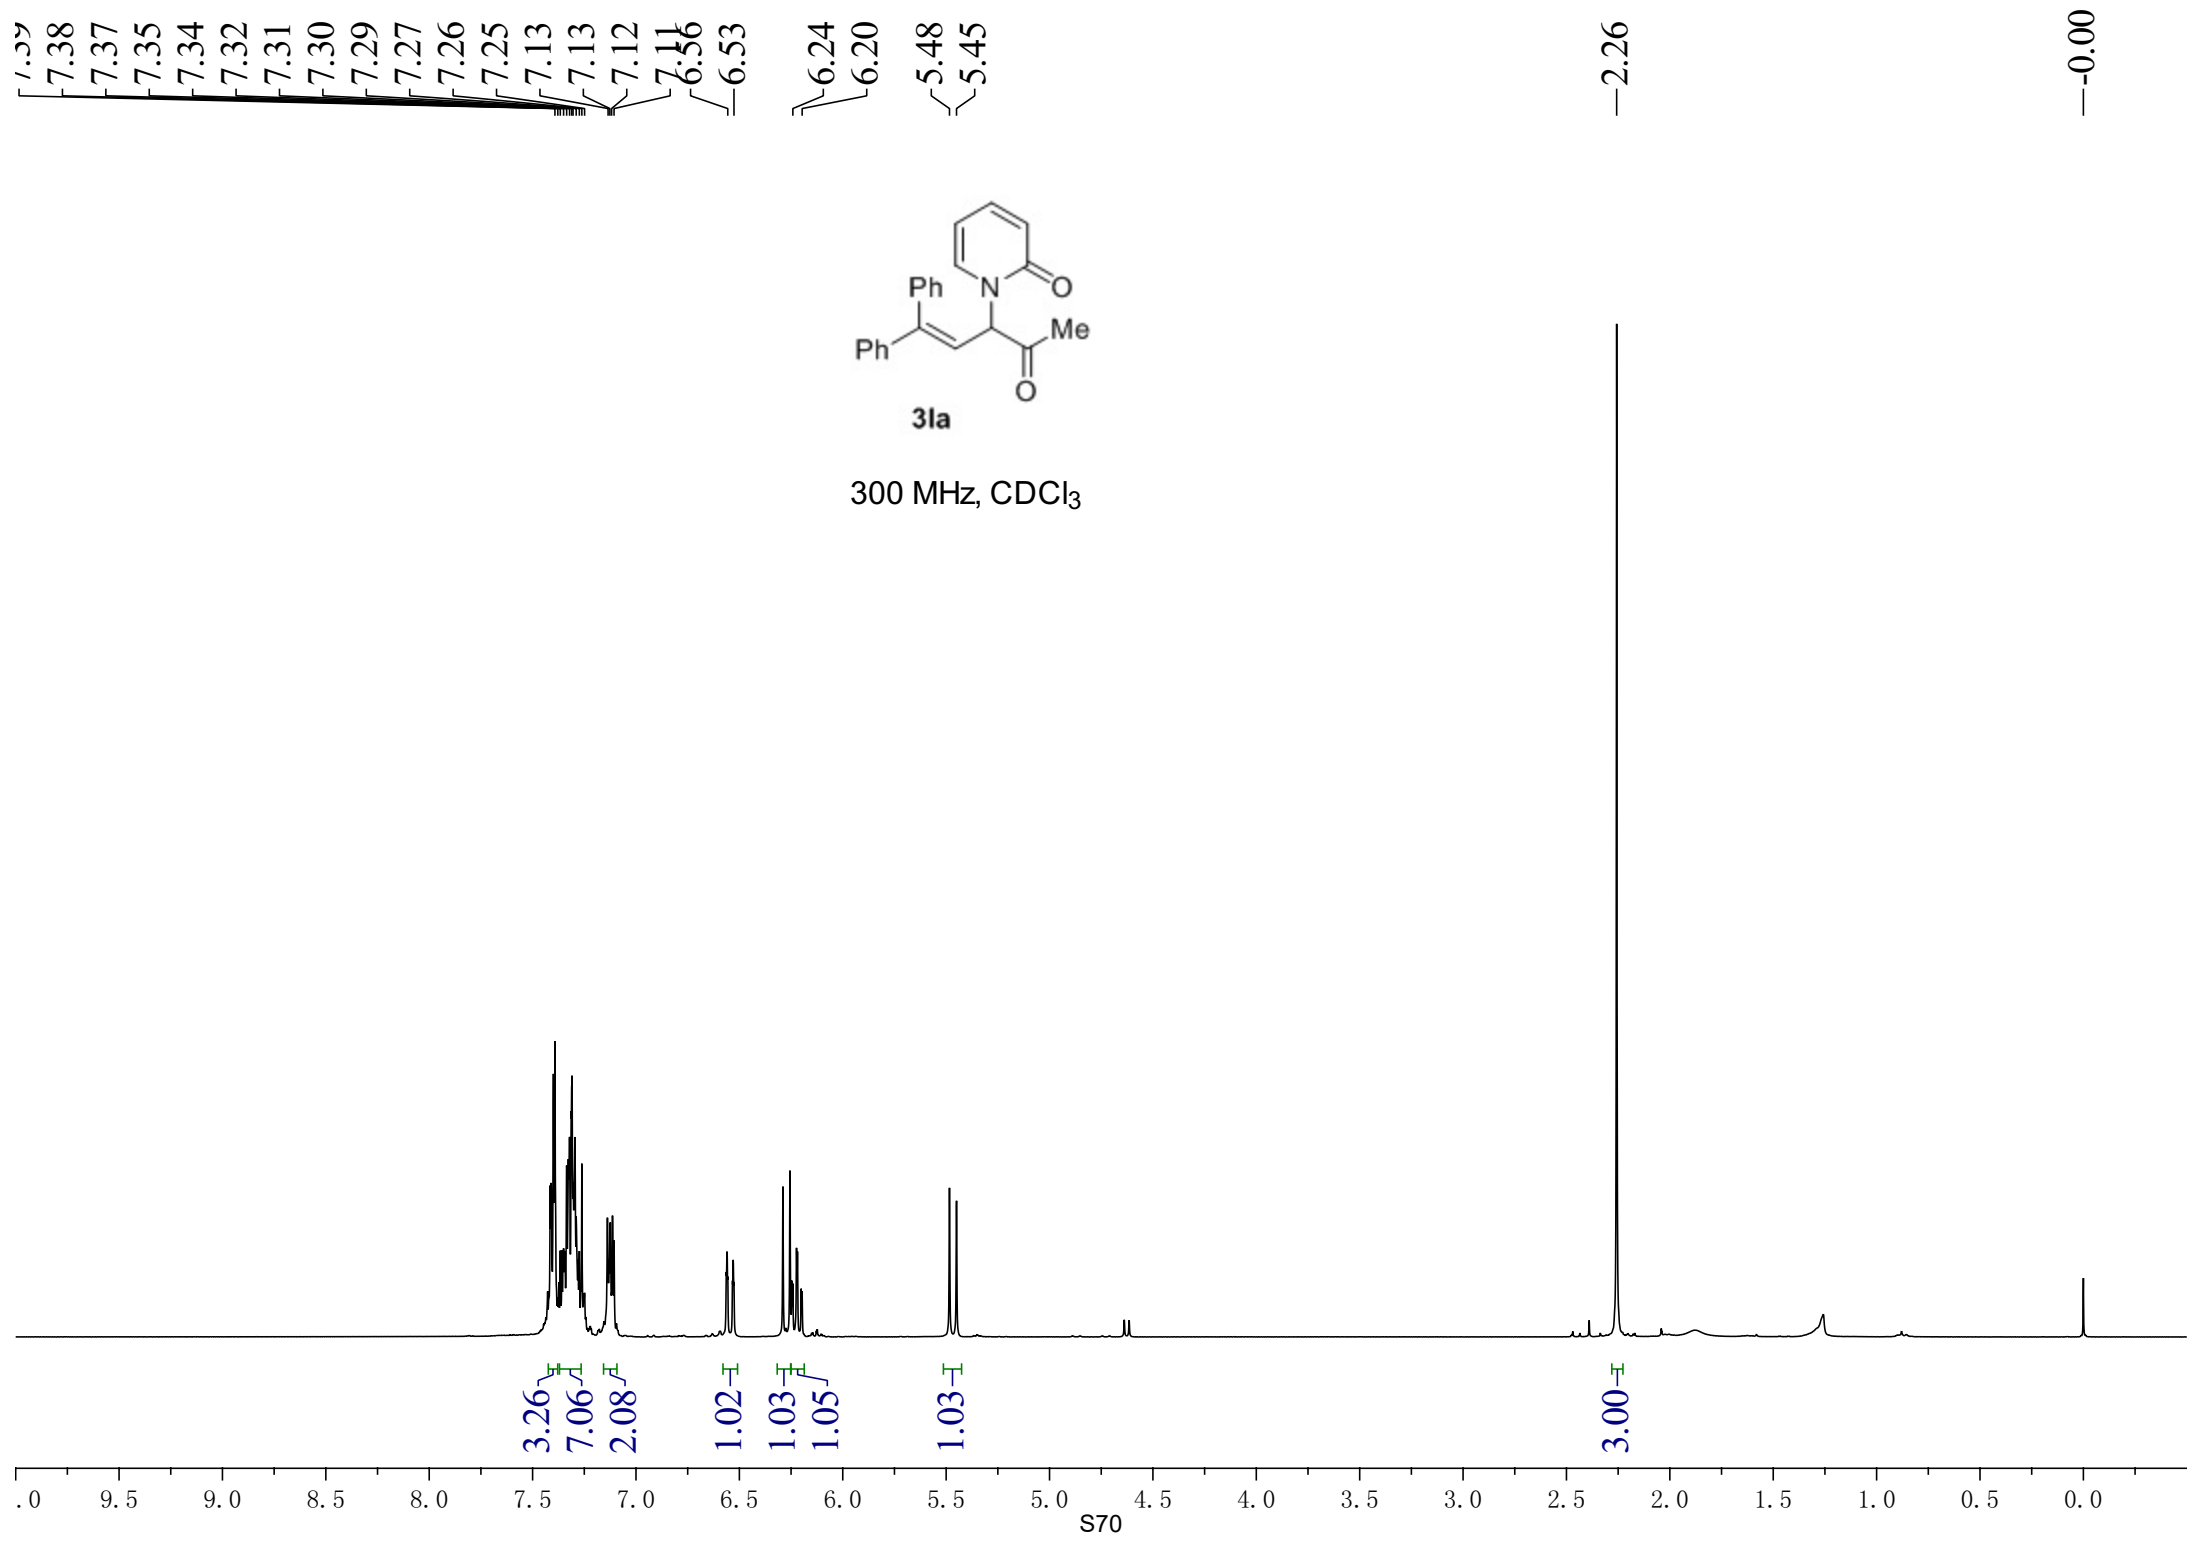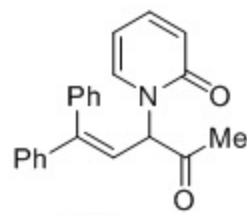

300 MHz, CDCl<sub>3</sub>





—202.23

—162.17

—151.73

139.99

135.88

129.04

128.92

128.59

128.54

127.77

120.72

118.69

106.31

—66.84

—28.04

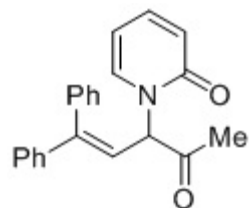

**3a**

100 MHz, CDCl<sub>3</sub>

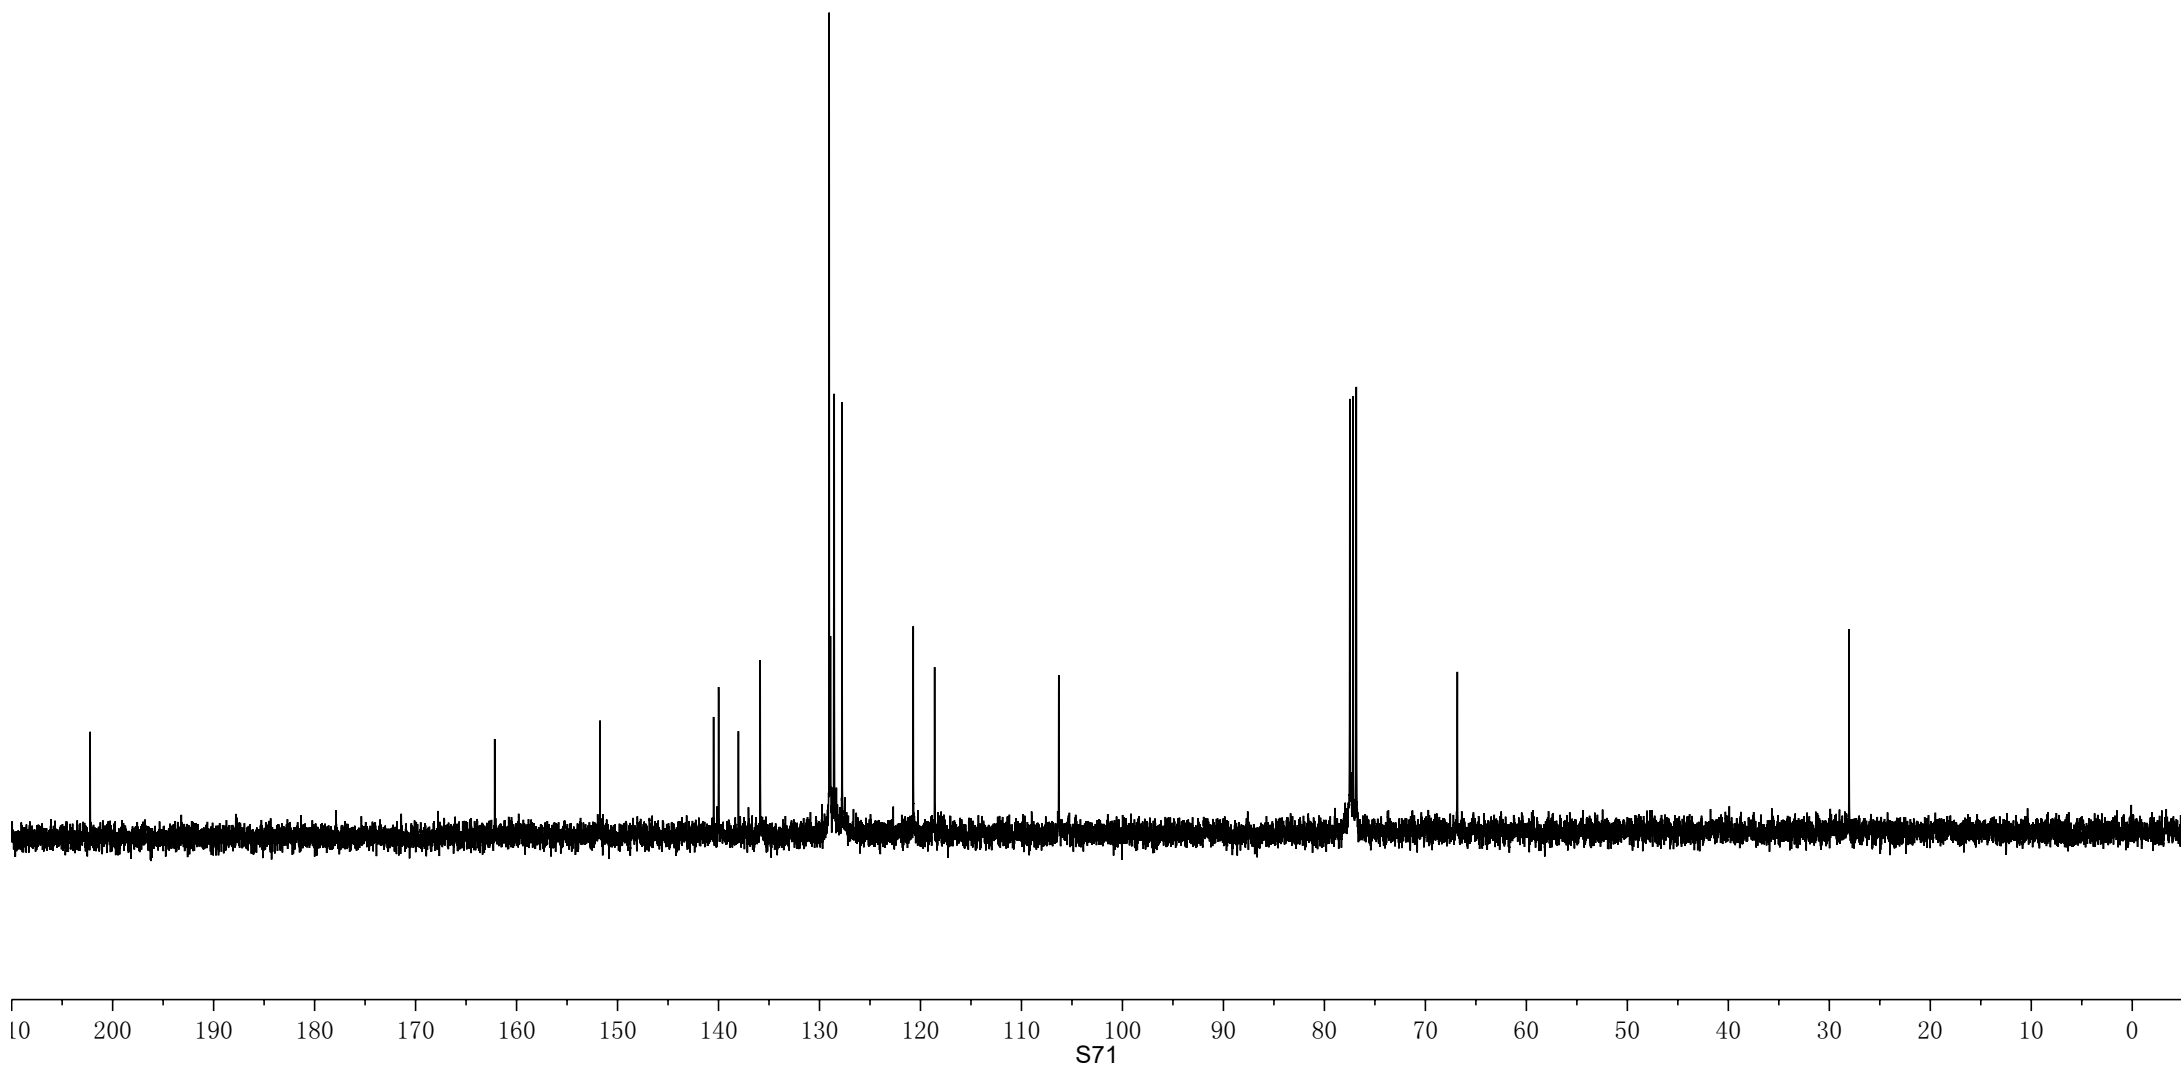

7.33 7.32 7.31 7.29 7.29 7.28 7.27 7.26 7.26 7.13 7.12 7.11 7.10 6.54 6.52 6.23 6.21 5.54 5.51 2.60 2.57 2.56 2.55 2.54 2.53 2.51 2.50 2.49 2.47 1.65 1.62 1.60 1.57 0.92 0.90 0.88 -0.00

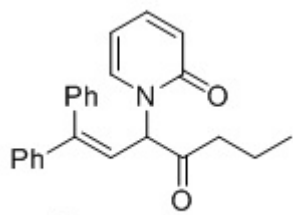

**3ma**  
400 MHz, CDCl<sub>3</sub>

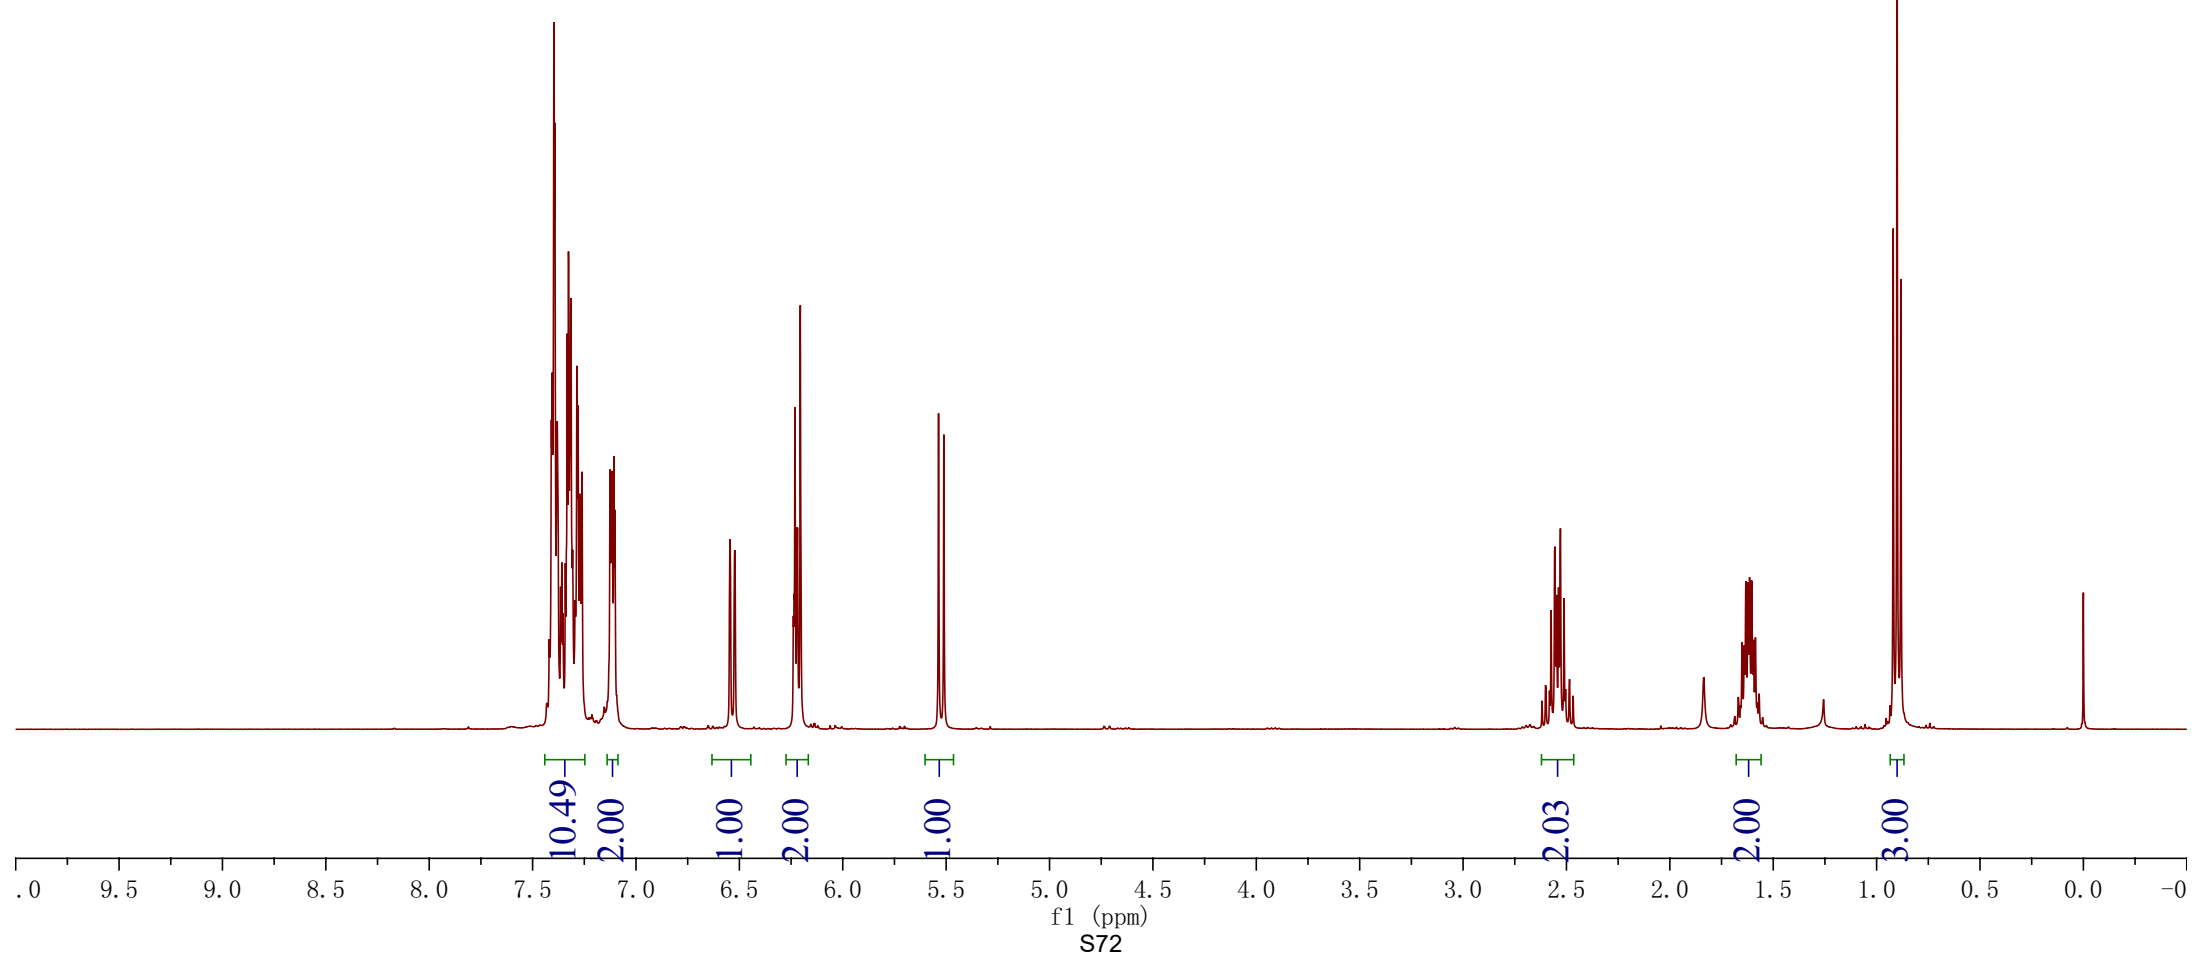

-204.53

-162.10

-151.65

139.78

135.78

128.98

128.95

128.83

128.52

128.49

127.73

126.67

-66.14

-42.60

-16.85

-13.74

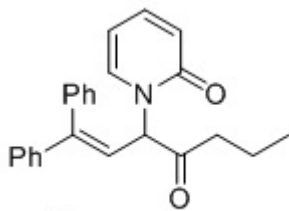

3ma

75 MHz, CDCl<sub>3</sub>

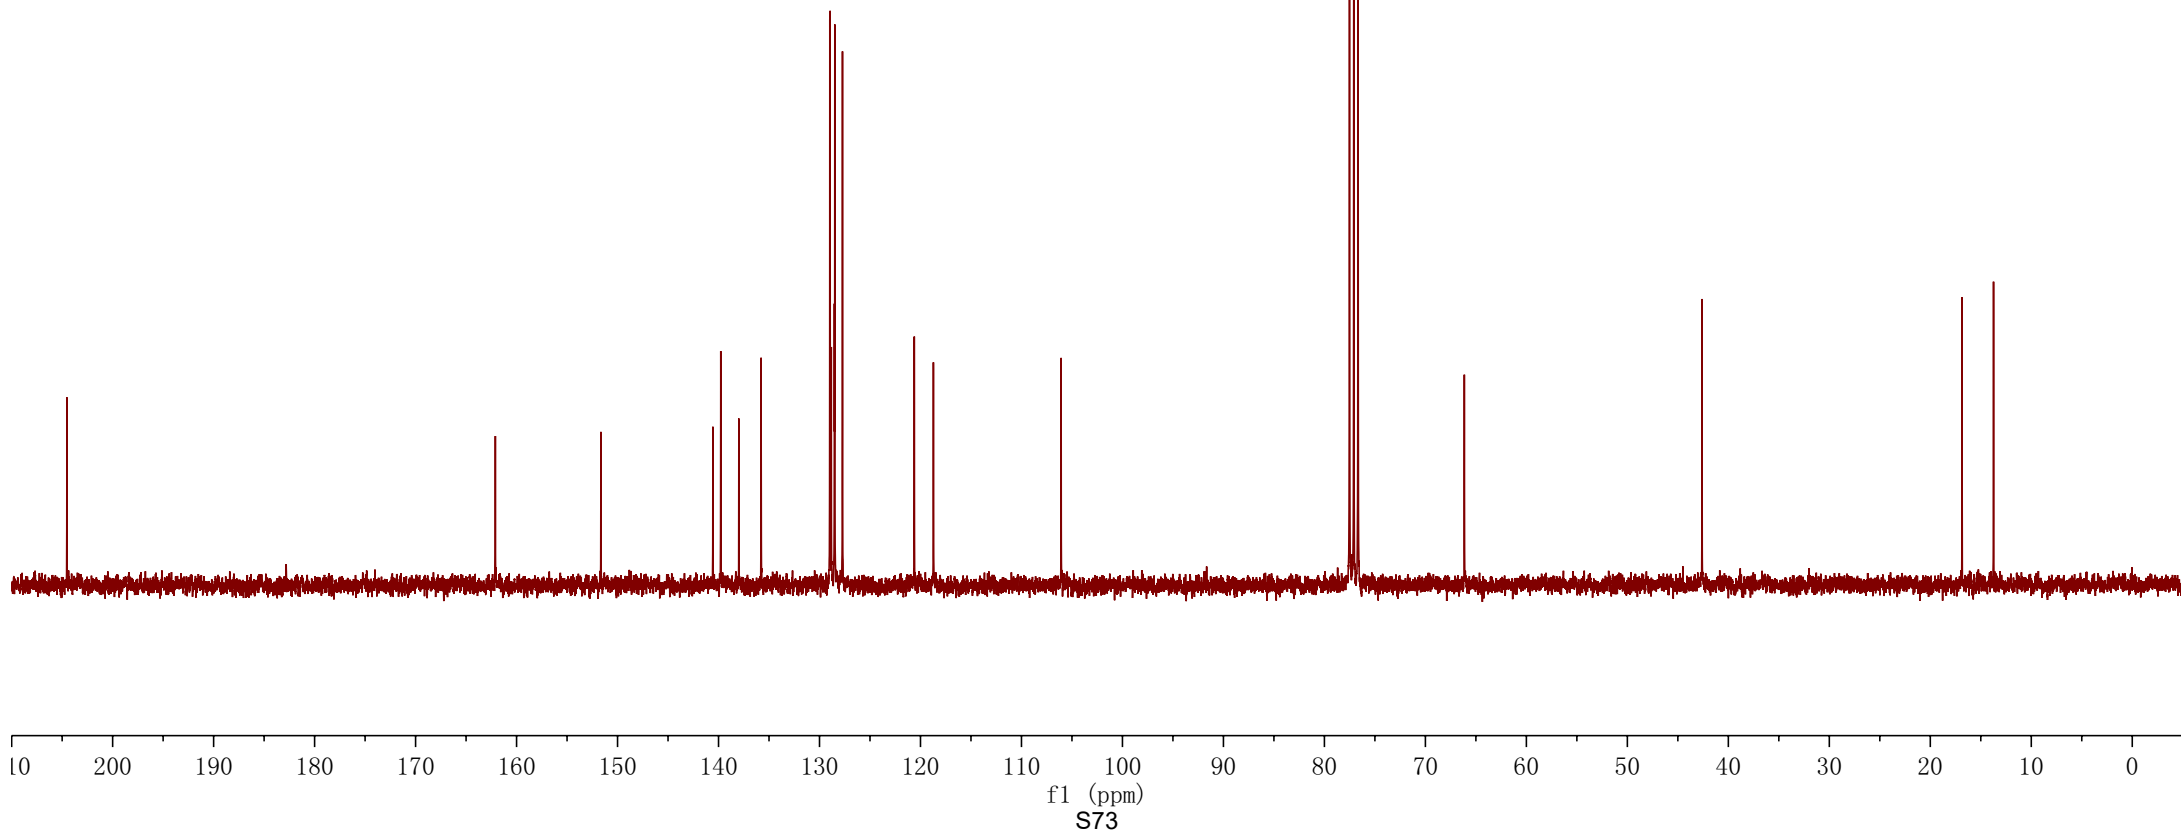

7.41  
7.39  
7.38  
7.37  
7.35  
7.30  
7.29  
7.27  
7.25  
7.22  
7.21  
7.19  
7.09  
7.07

6.51  
6.30  
6.29  
6.28  
6.28  
6.26  
6.26  
6.19  
6.16

0.00

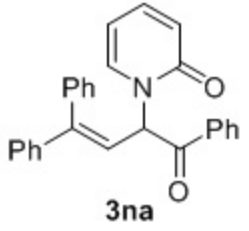

400 MHz, CDCl<sub>3</sub>

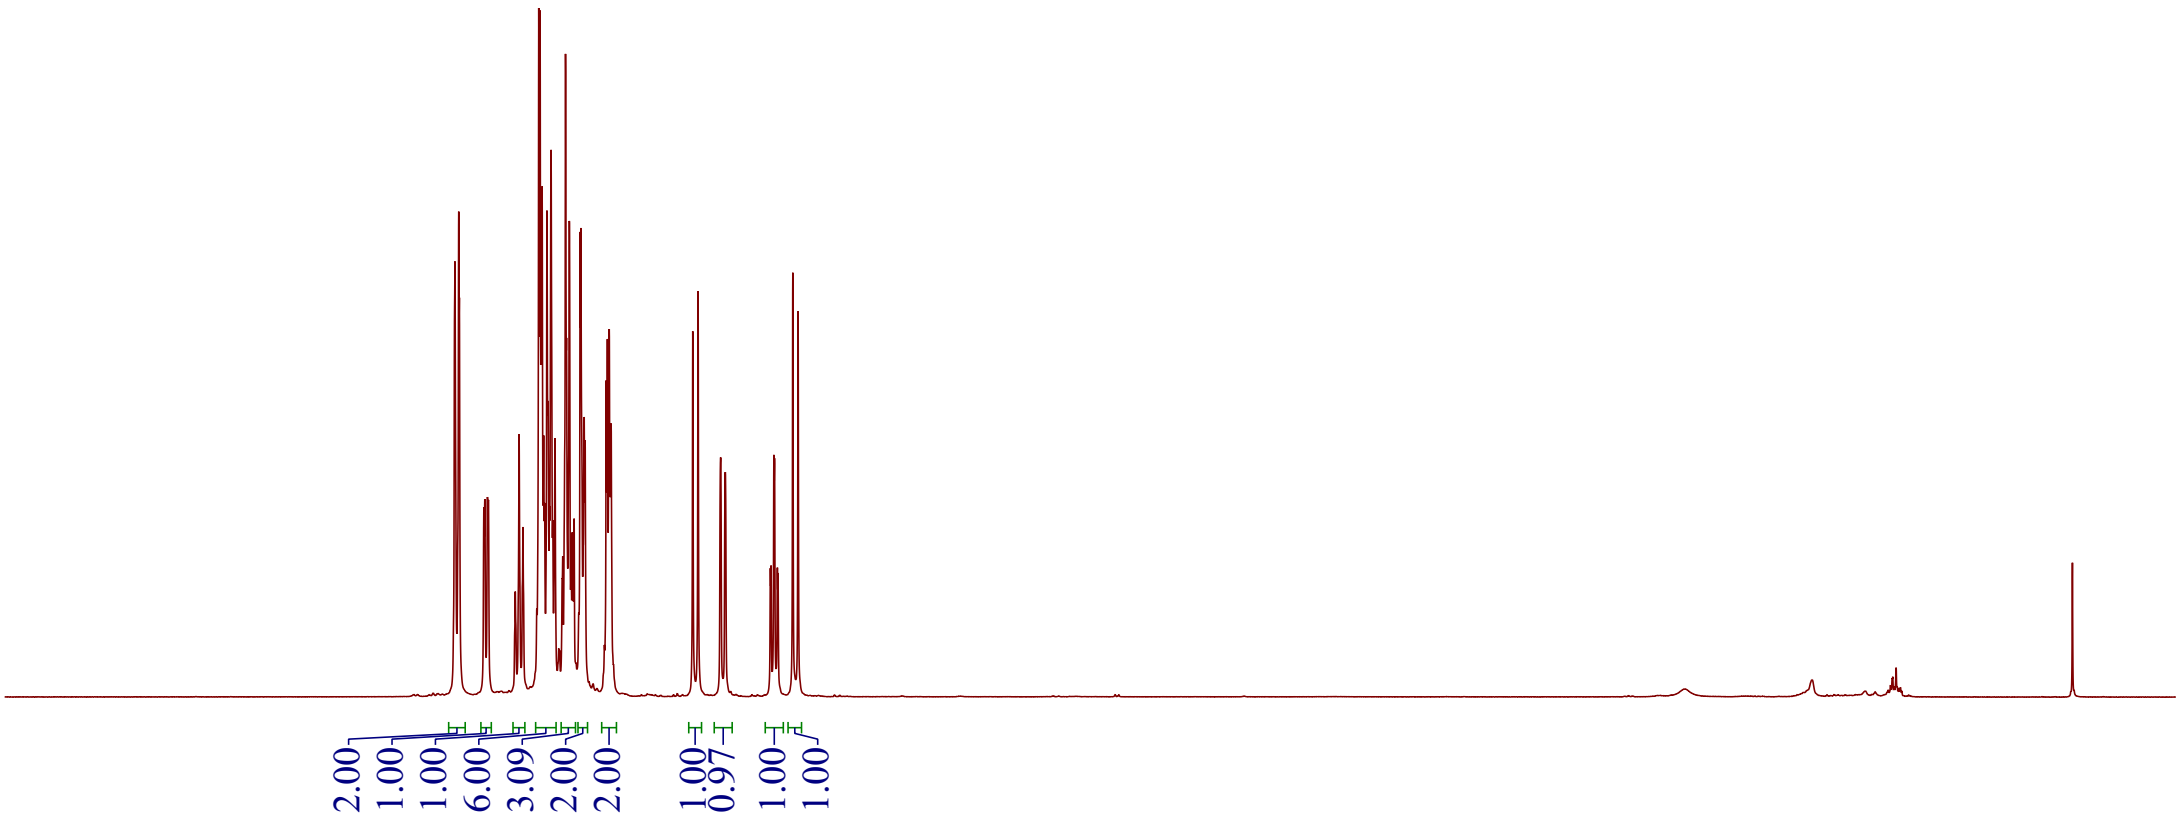

2.00  
1.00  
1.00  
6.00  
3.09  
2.00  
2.00  
1.00  
0.97  
1.00  
1.00

f1 (ppm)  
S74

—194.95

—161.97

—152.05

133.62

129.03

128.96

128.93

128.79

128.77

128.64

128.46

127.93

106.18

—61.22

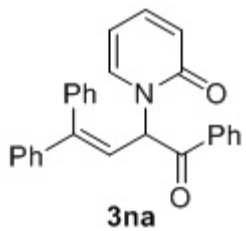

100 MHz, CDCl<sub>3</sub>

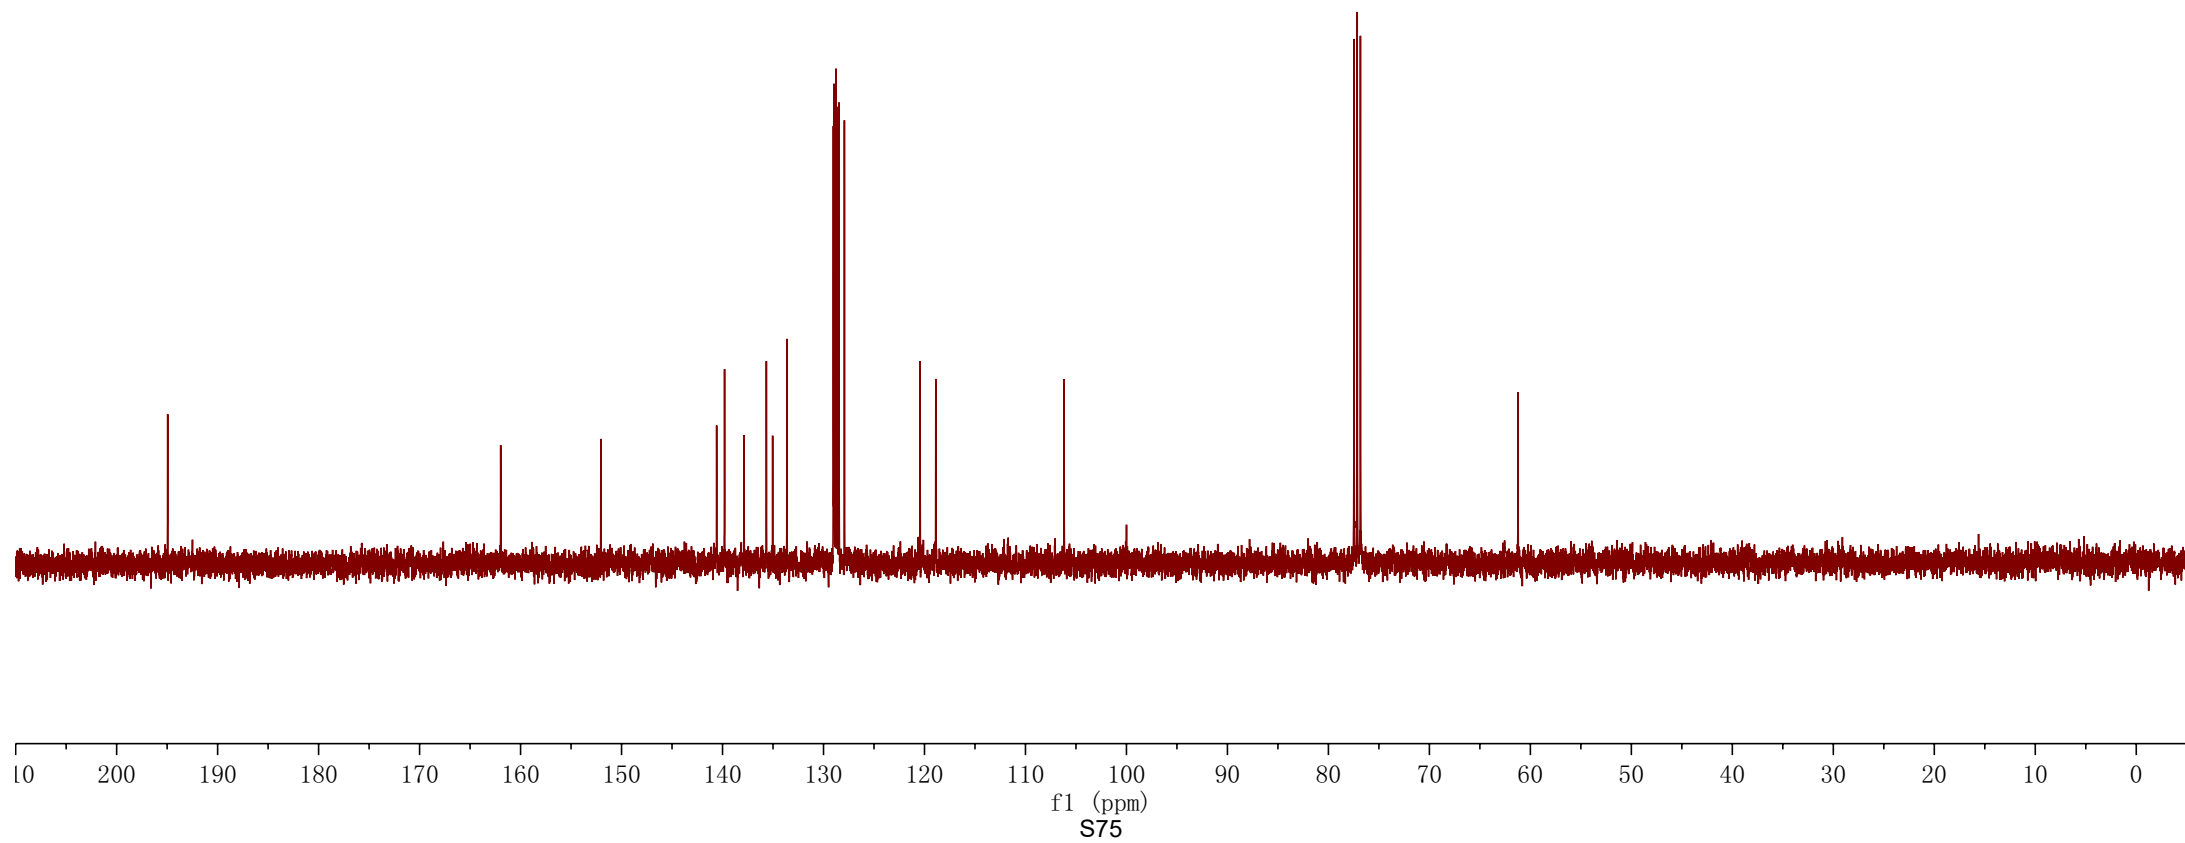

7.64  
7.64  
7.62  
7.62  
-7.27  
-7.07  
6.52  
6.21  
6.18  
5.85  
5.83

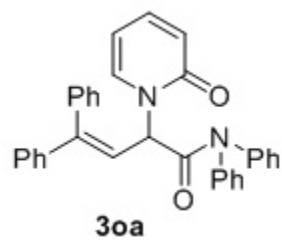

400 MHz, CDCl<sub>3</sub>

-0.00

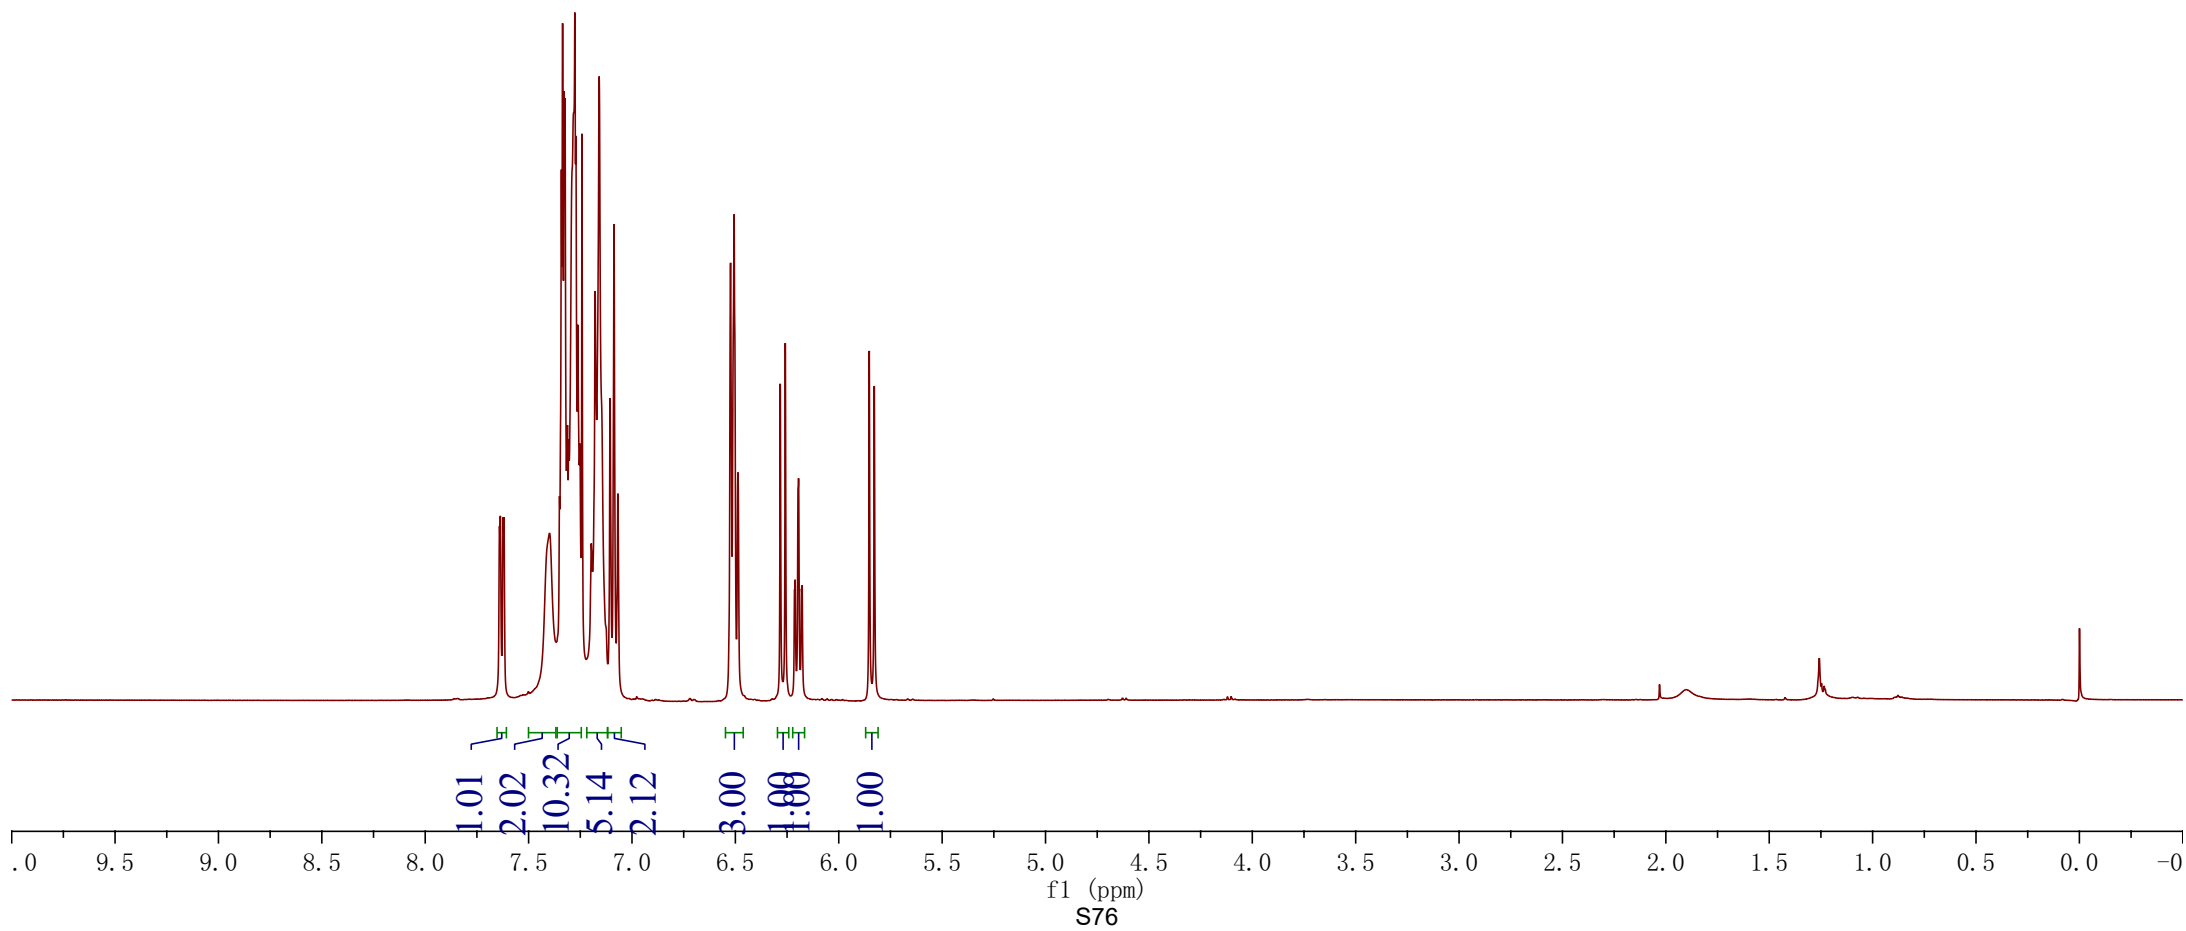

—169.56  
—162.33  
—151.95  
139.69  
136.15  
128.88  
128.85  
128.67  
128.53  
128.18  
127.99  
126.42  
120.16  
118.58  
105.78

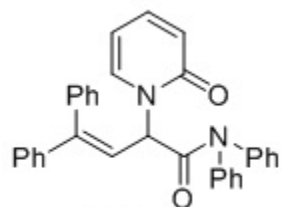

3oa

100 MHz, CDCl<sub>3</sub>

—58.96

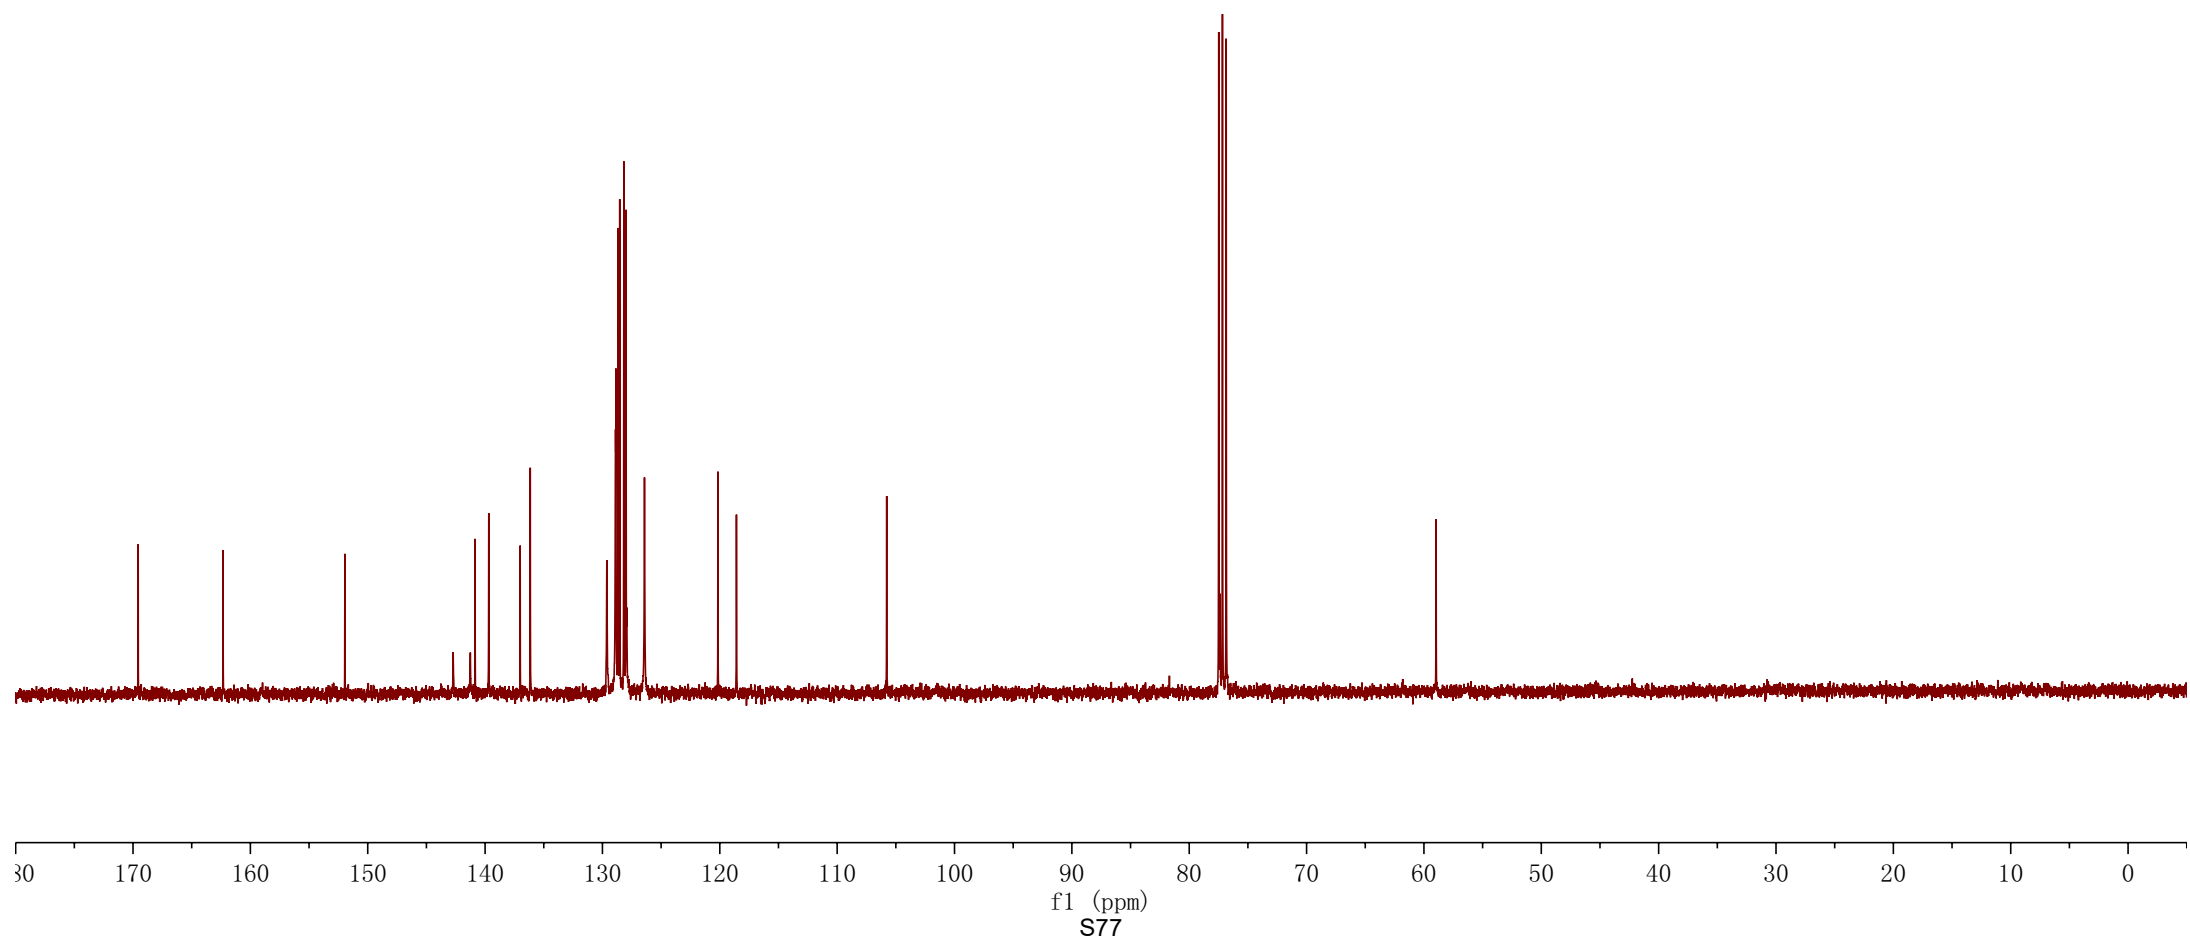

7.69  
7.69  
7.67  
7.67

7.32  
7.06

6.52  
6.50

6.25  
6.24  
6.23  
6.23  
6.21  
6.19  
6.17

3.50  
3.19

1.78

0.00

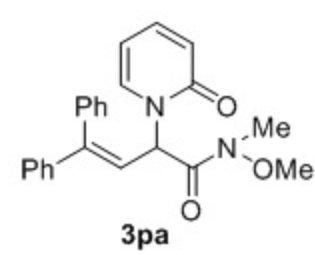

400 MHz, CDCl<sub>3</sub>

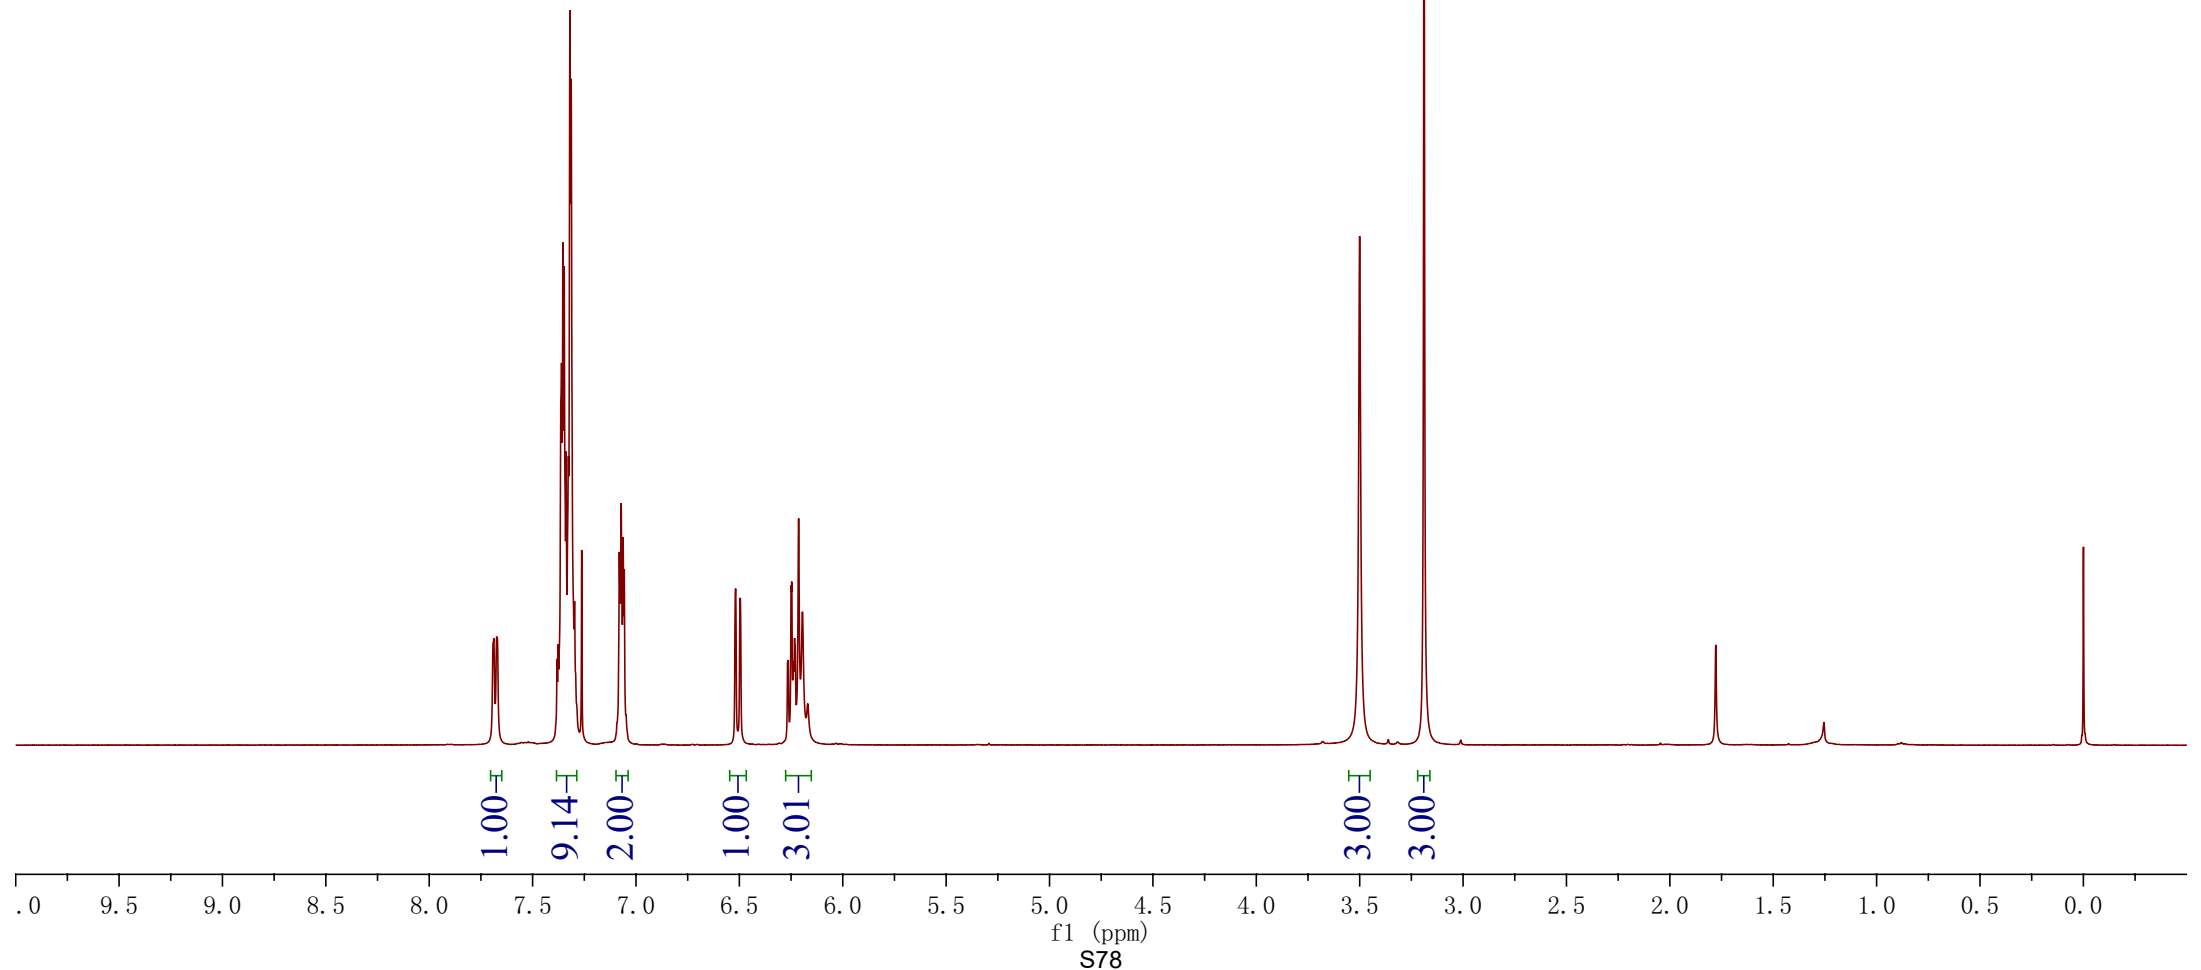



—162.22  
—151.30  
—139.63  
—129.08  
—128.73  
—128.48  
—128.43  
—128.31  
—127.89  
—126.17  
—118.56

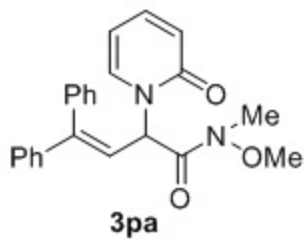

100 MHz, CDCl<sub>3</sub>

—105.87

—60.97  
—56.57

—32.27

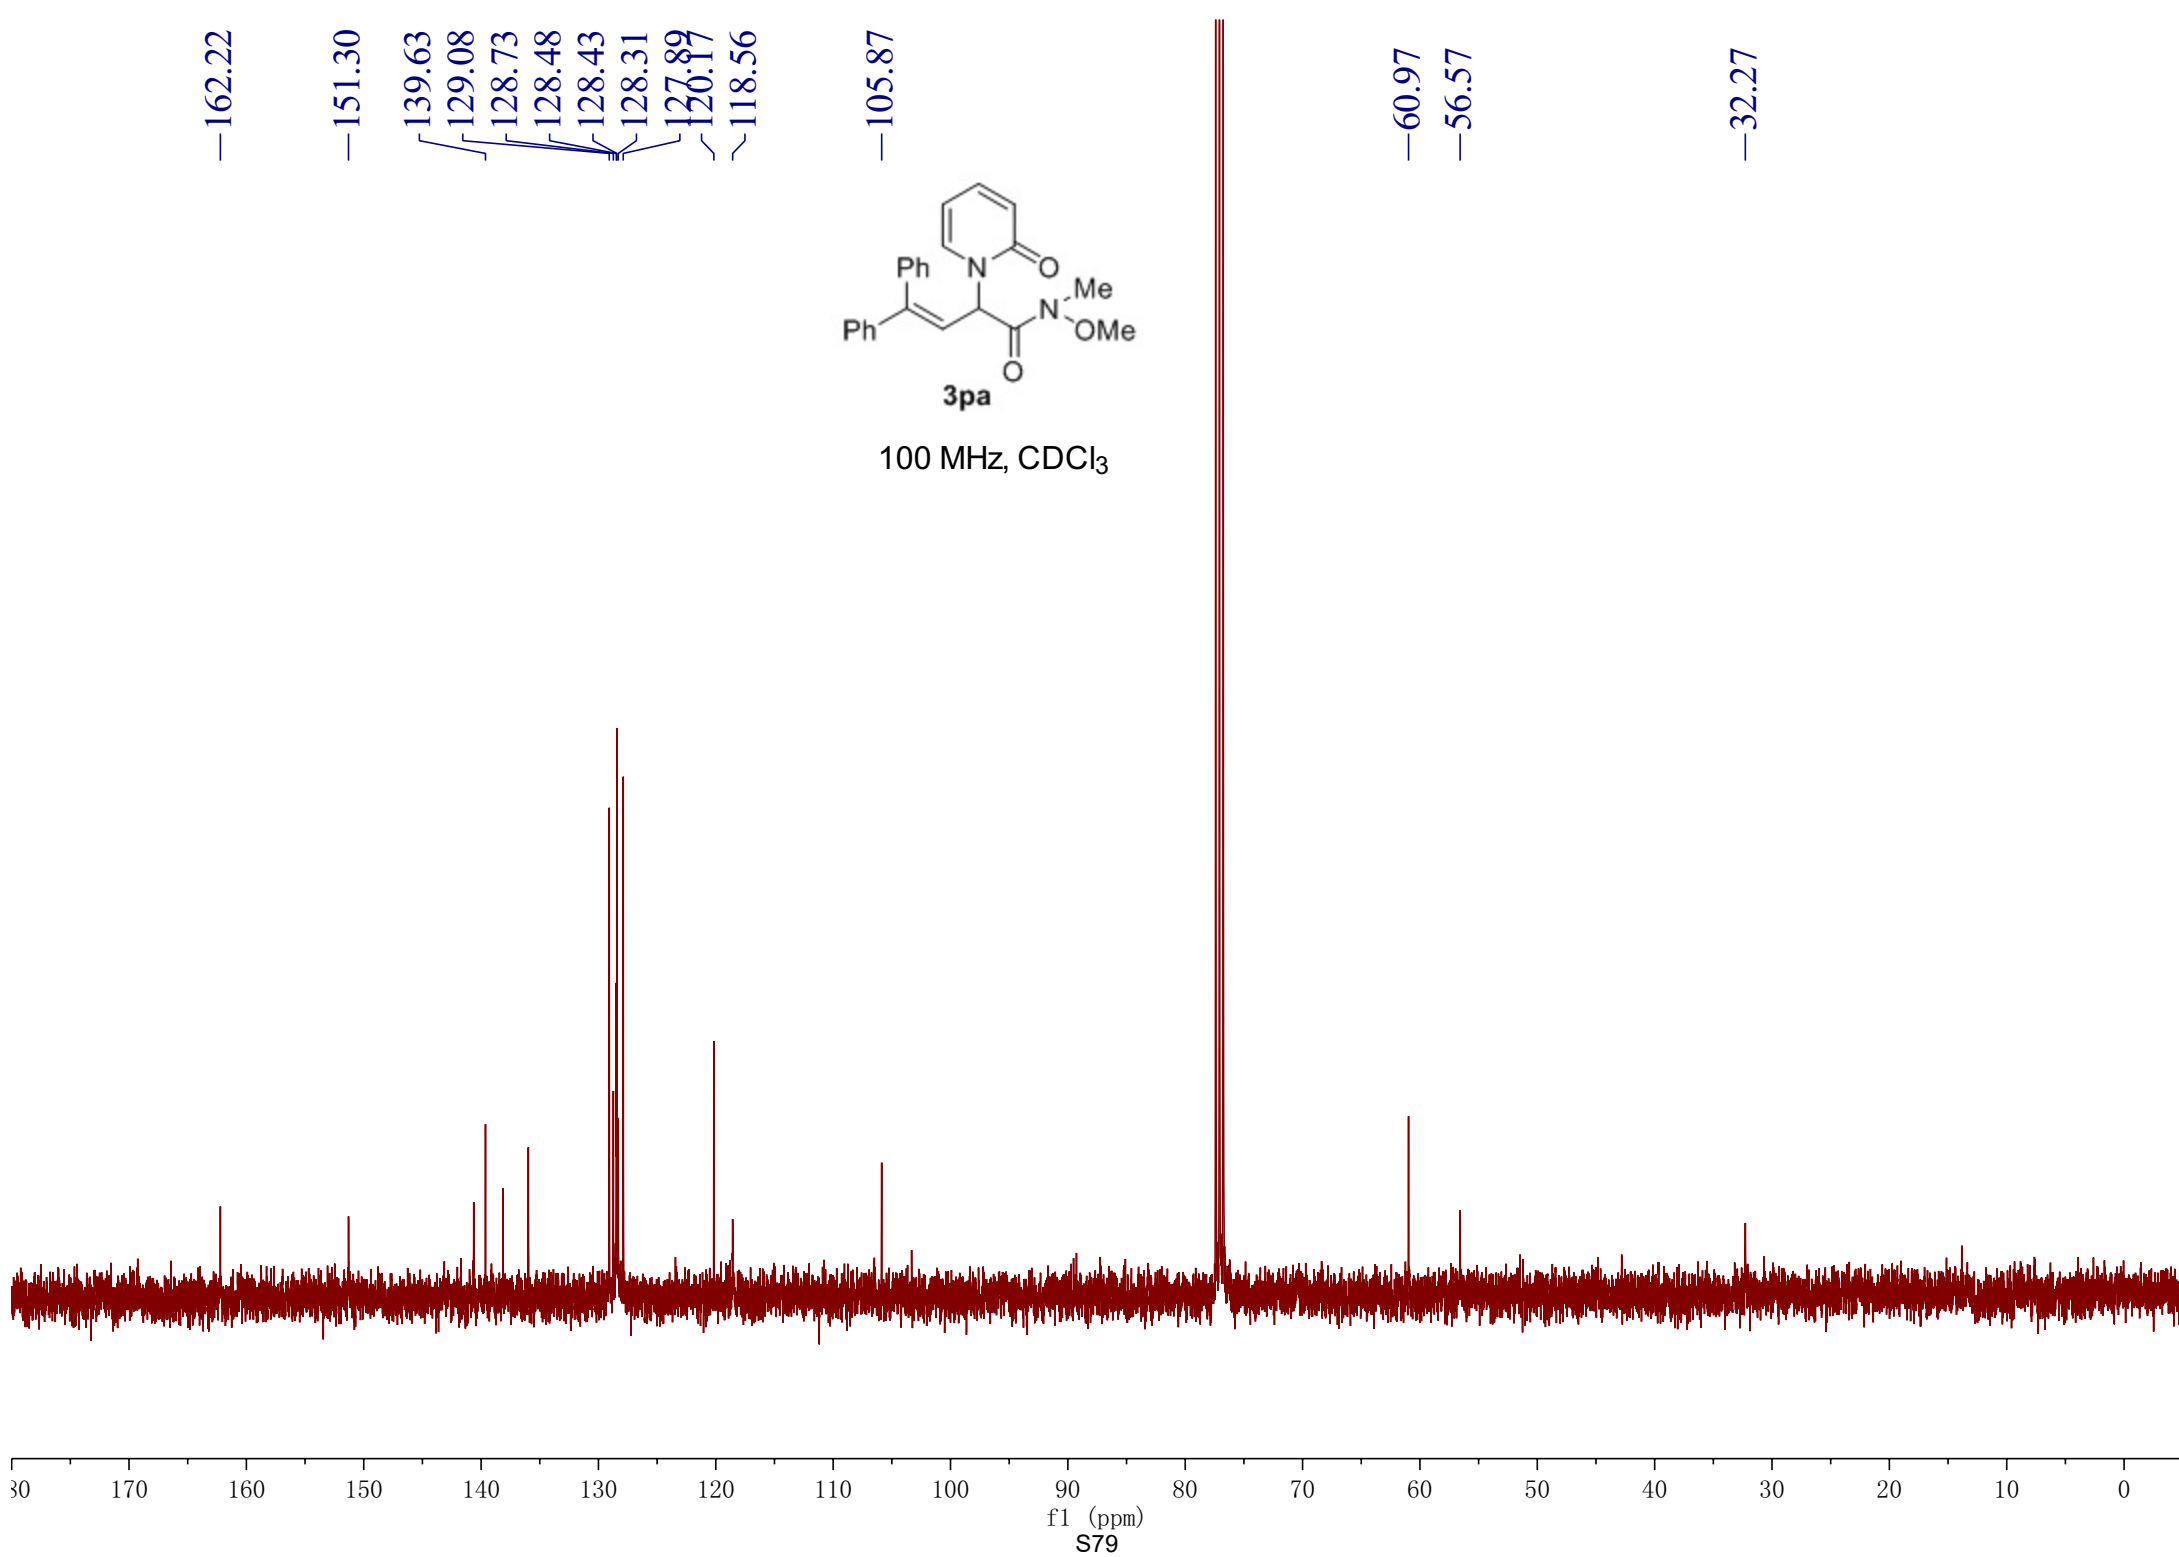

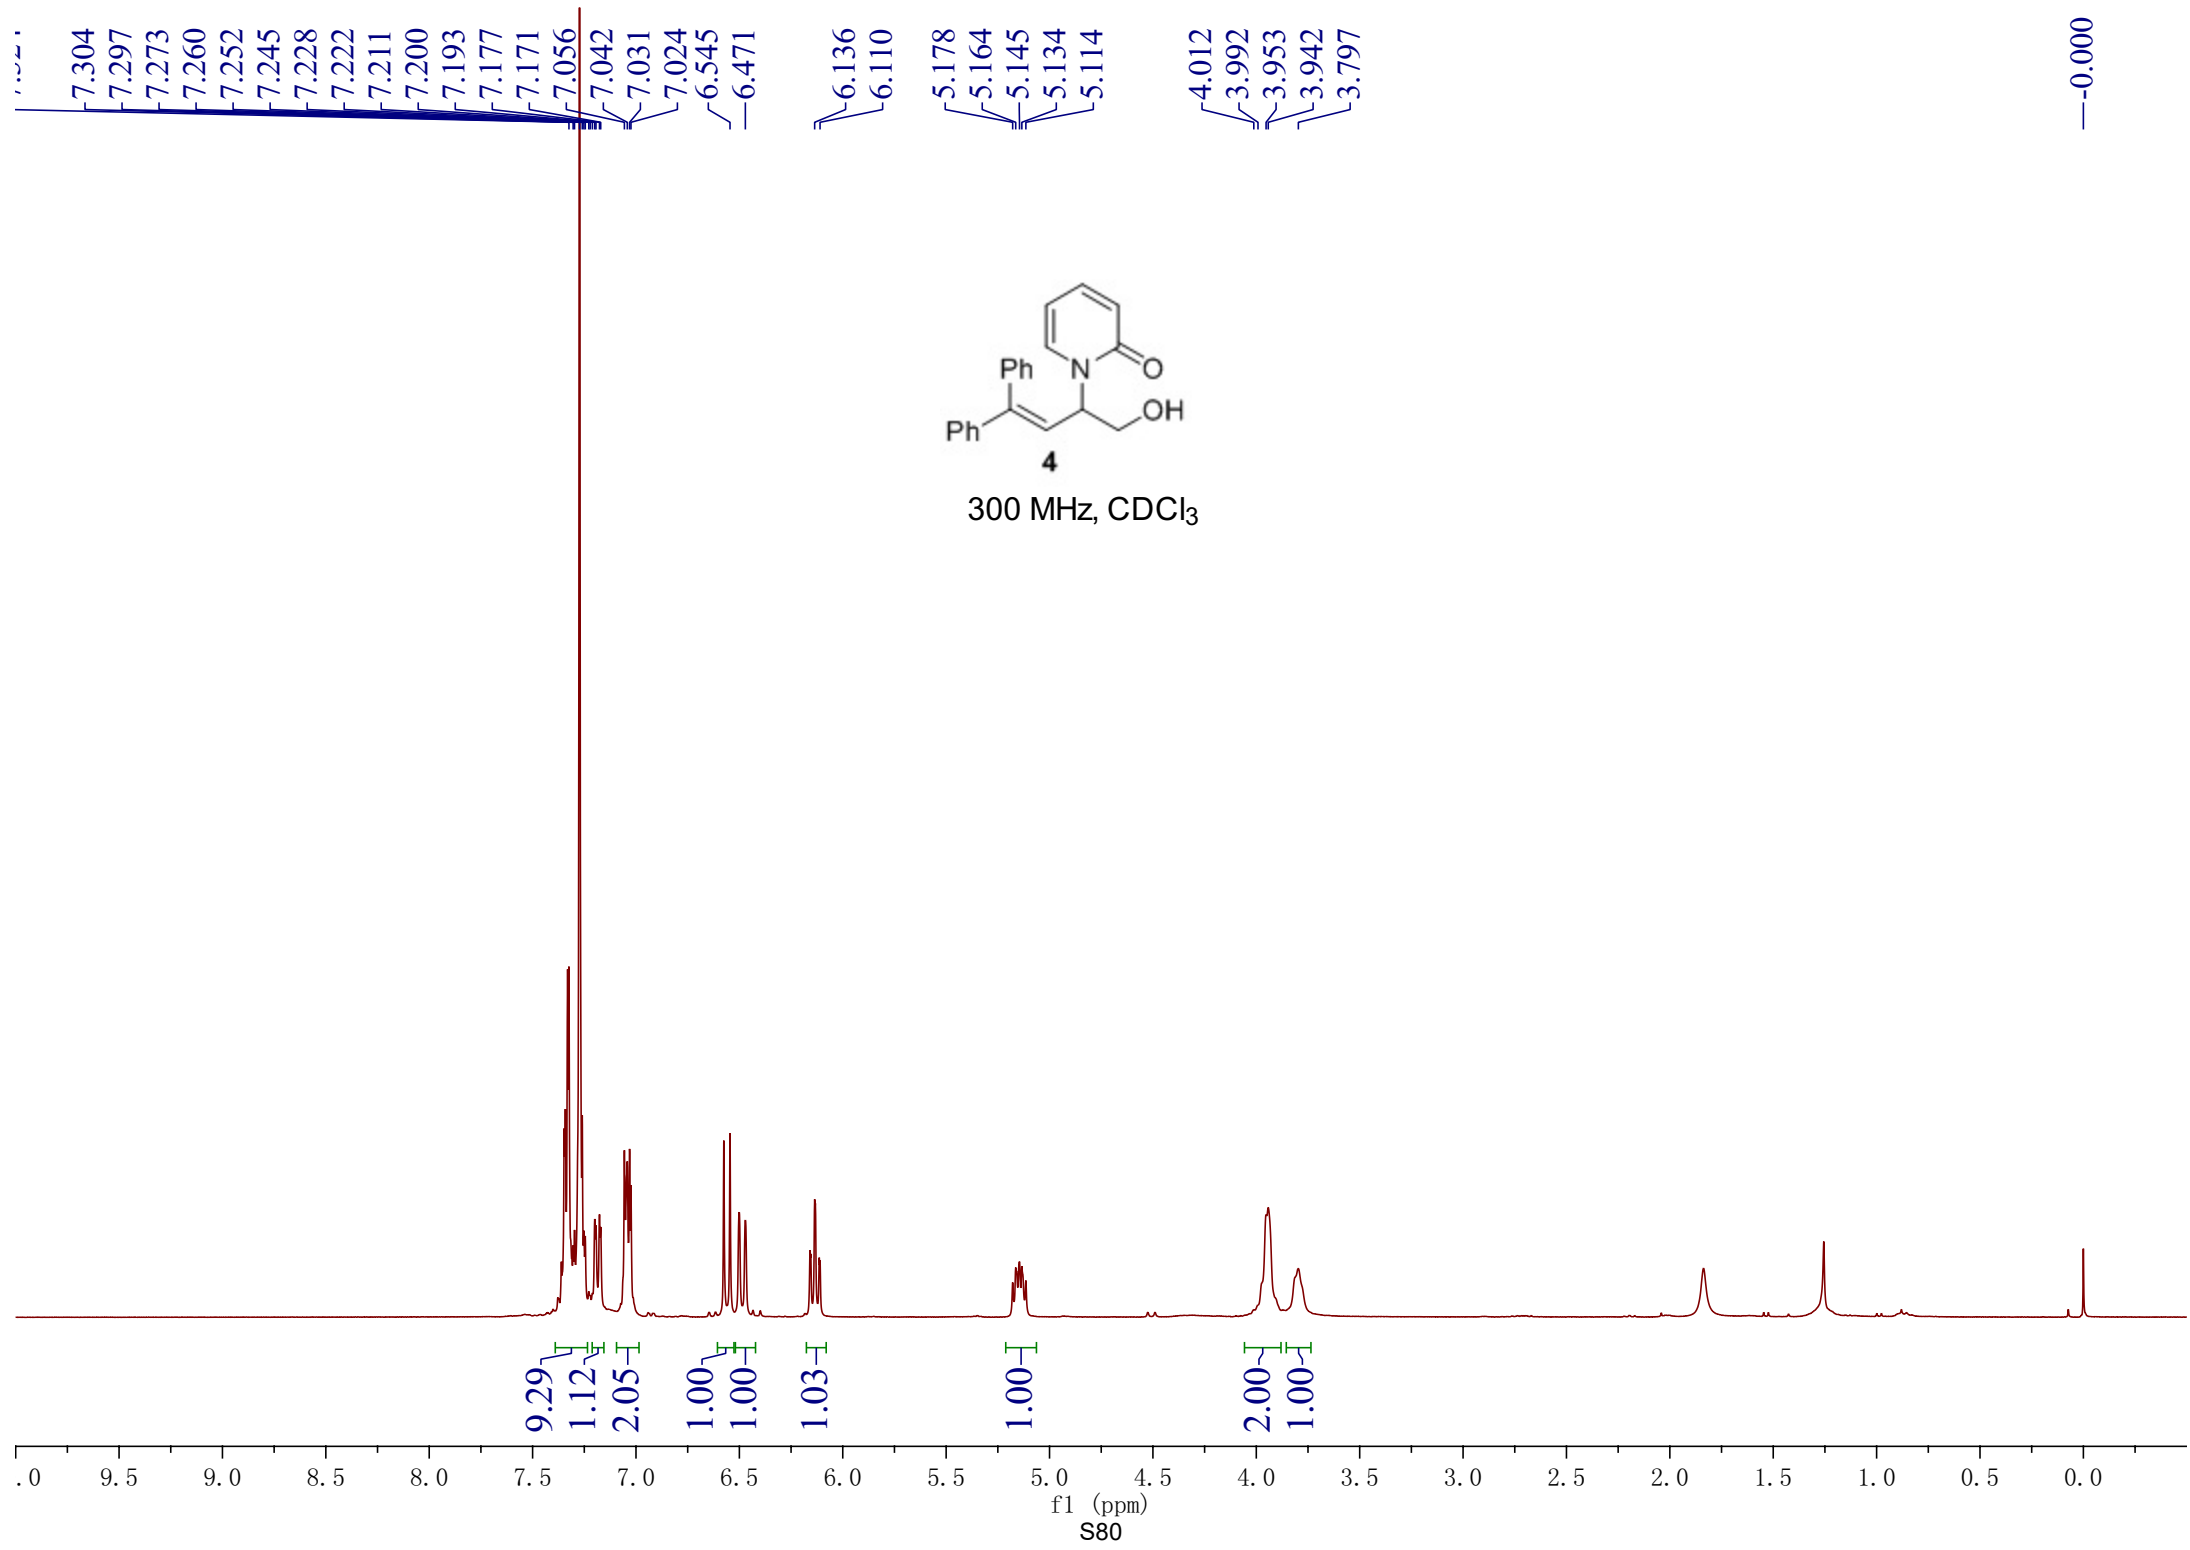

—163.327

—147.893

—140.899

—139.443

—138.610

—136.711

—129.021

—128.629

—128.273

—128.189

—127.948

—127.541

—121.841

—106.486

—64.974

—61.121

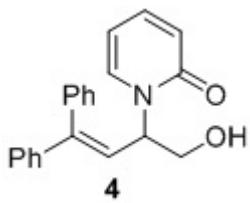

75 MHz, CDCl<sub>3</sub>

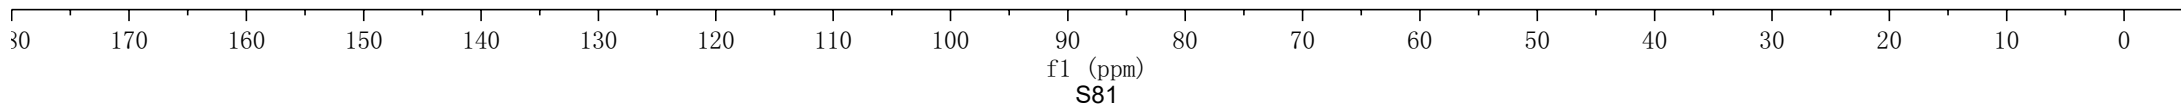

5.845  
5.815

5.258  
5.229

3.266  
3.248  
3.230

2.415  
2.396  
2.378  
2.974  
1.800  
1.746  
1.643

1.443

1.225  
1.188  
1.143  
1.111

0.000

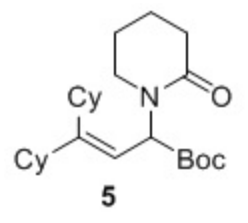

300 MHz, CDCl<sub>3</sub>

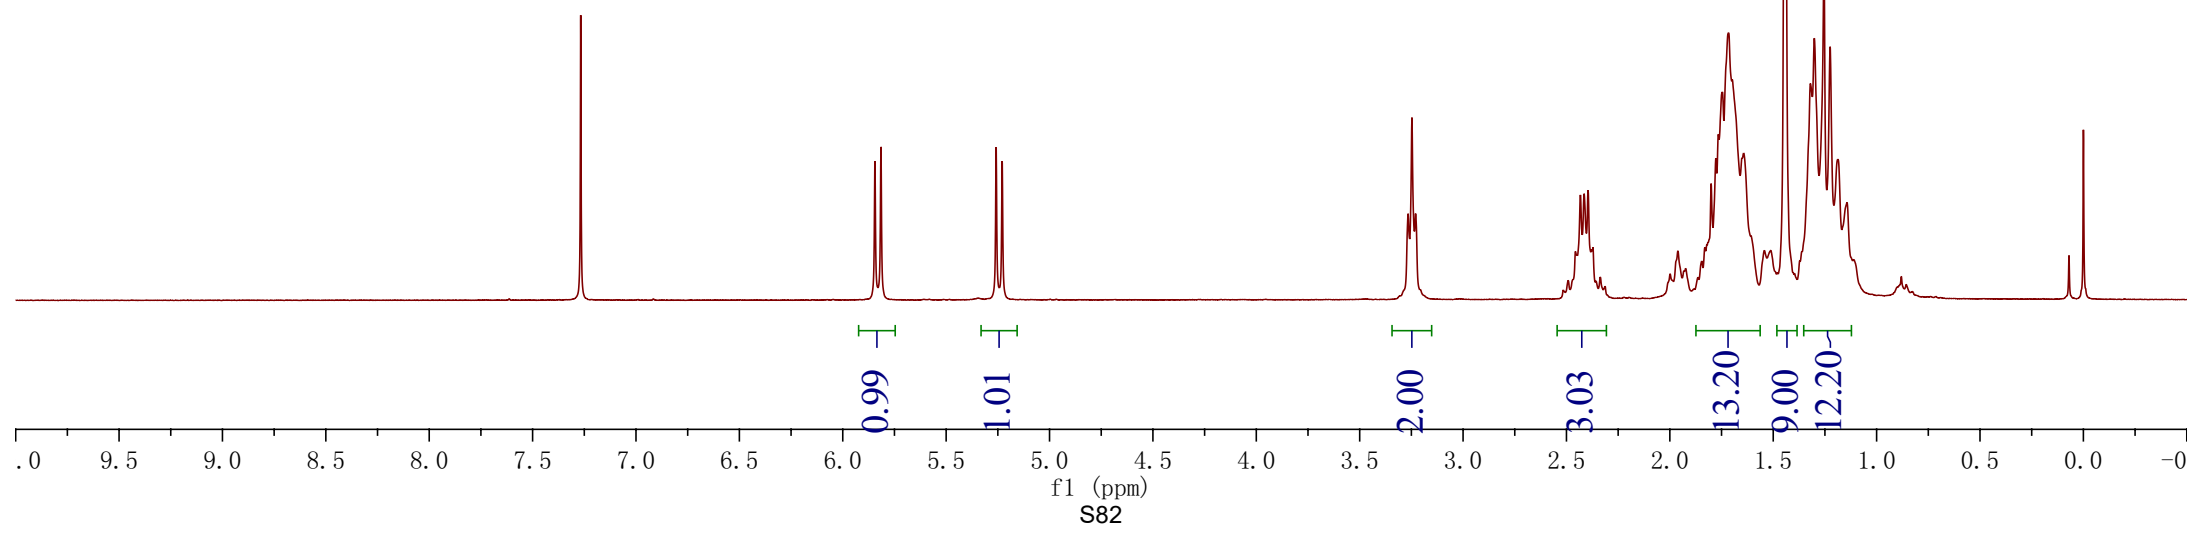

~171.021  
~169.415

—158.254

—115.029

—81.230

—54.182  
44.218  
41.204  
39.894  
35.196  
34.857  
32.370  
30.563  
30.365  
28.038  
27.068  
27.011  
26.204  
26.163  
26.151  
26.058  
23.317  
21.162

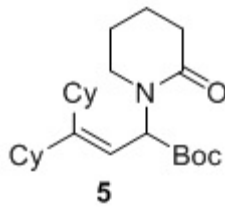

75 MHz, CDCl<sub>3</sub>

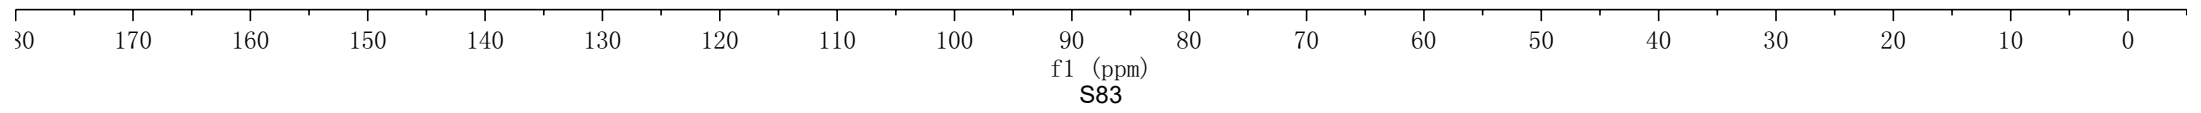

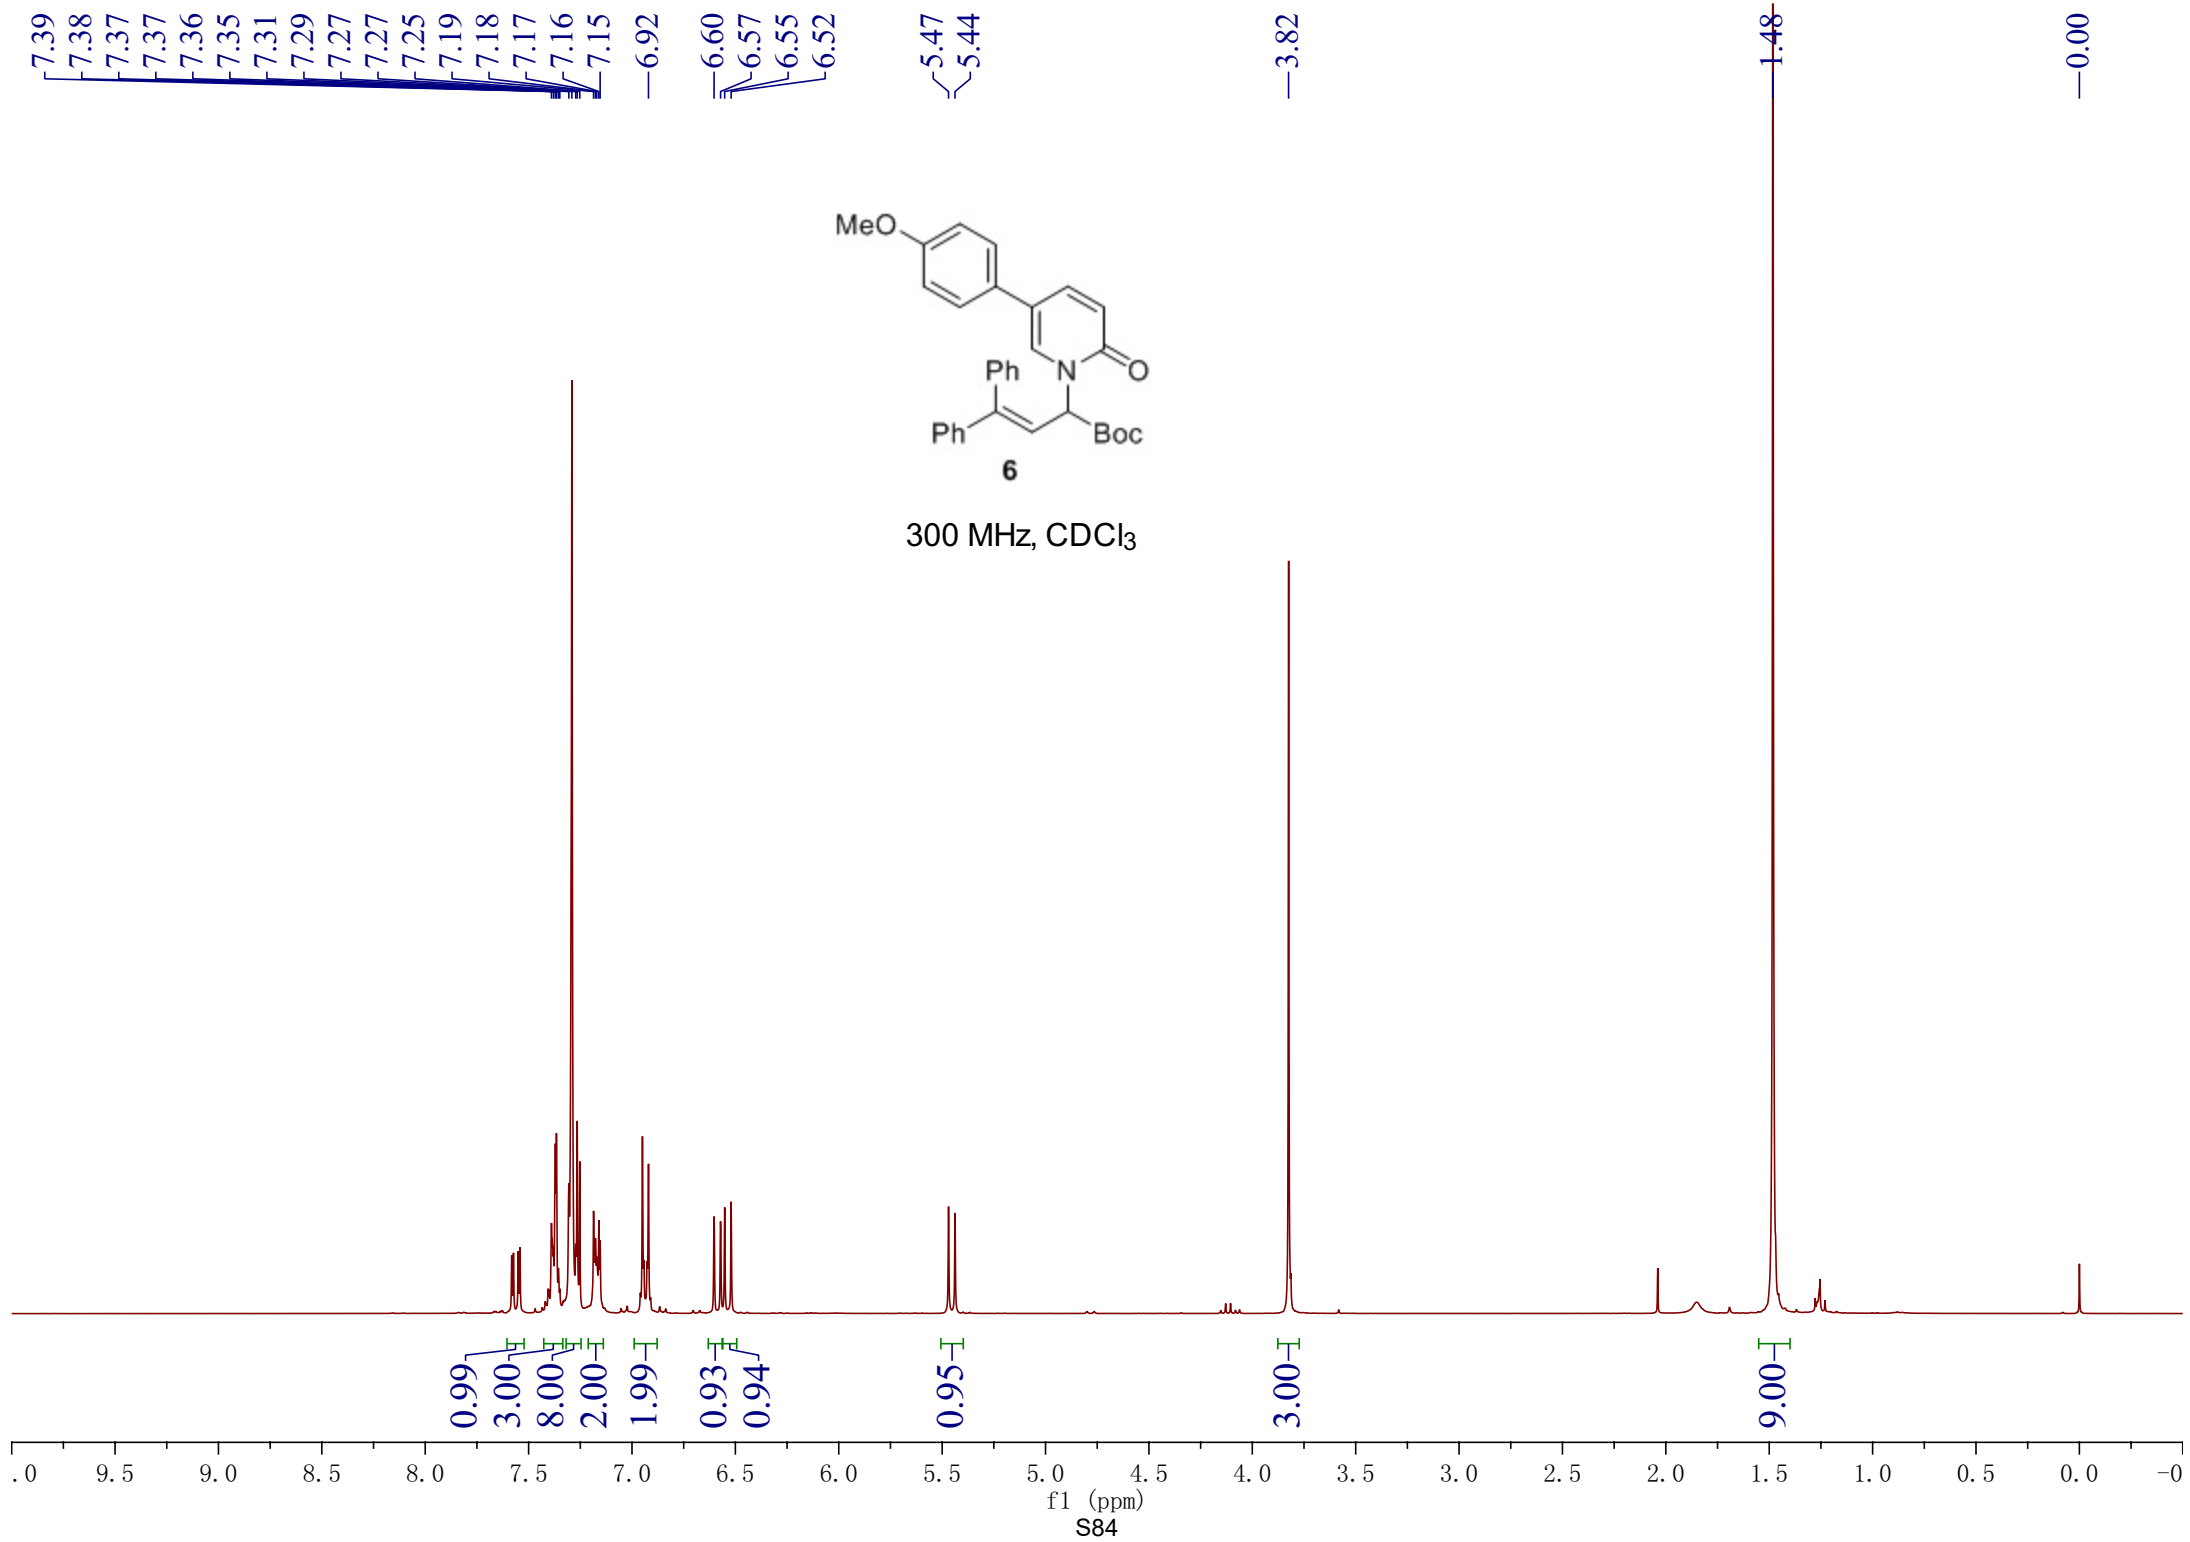

—168.149  
~161.180  
~159.046  
—149.317  
129.364  
128.710  
128.414  
128.349  
128.185  
127.688  
127.051  
120.662  
120.212  
119.734  
114.455

—82.748

—61.772

—55.397

—27.983

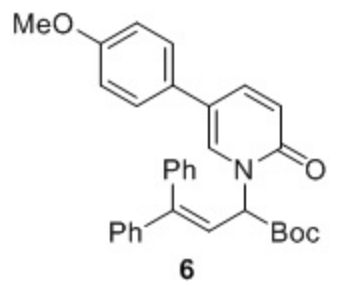

75 MHz, CDCl<sub>3</sub>

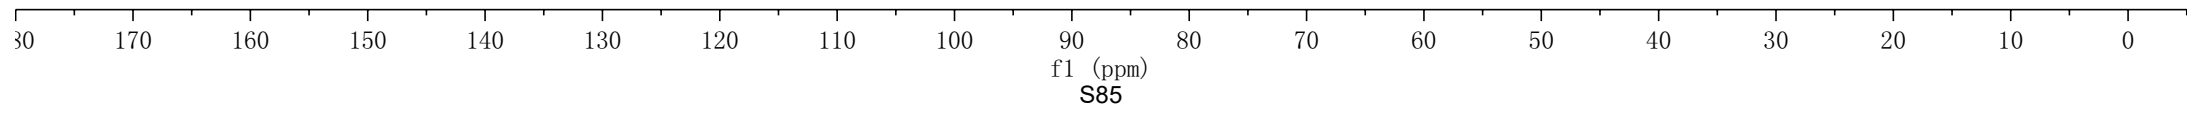

|                    |             |                               |         |                        |                                   |
|--------------------|-------------|-------------------------------|---------|------------------------|-----------------------------------|
| <b>Sample Name</b> | Sample62    | <b>Position</b>               | P1-F7   | <b>Instrument Name</b> | Instrument 1                      |
| <b>User Name</b>   |             | <b>Inj Vol</b>                | 1       | <b>InjPosition</b>     |                                   |
| <b>Sample Type</b> | Sample      | <b>IRM Calibration Status</b> | Success | <b>Data Filename</b>   | KN-20201224-0018.d                |
| <b>ACQ Method</b>  | NOZHUNOUV.m | <b>Comment</b>                |         | <b>Acquired Time</b>   | 12/24/2020 1:44:53 PM (UTC+08:00) |

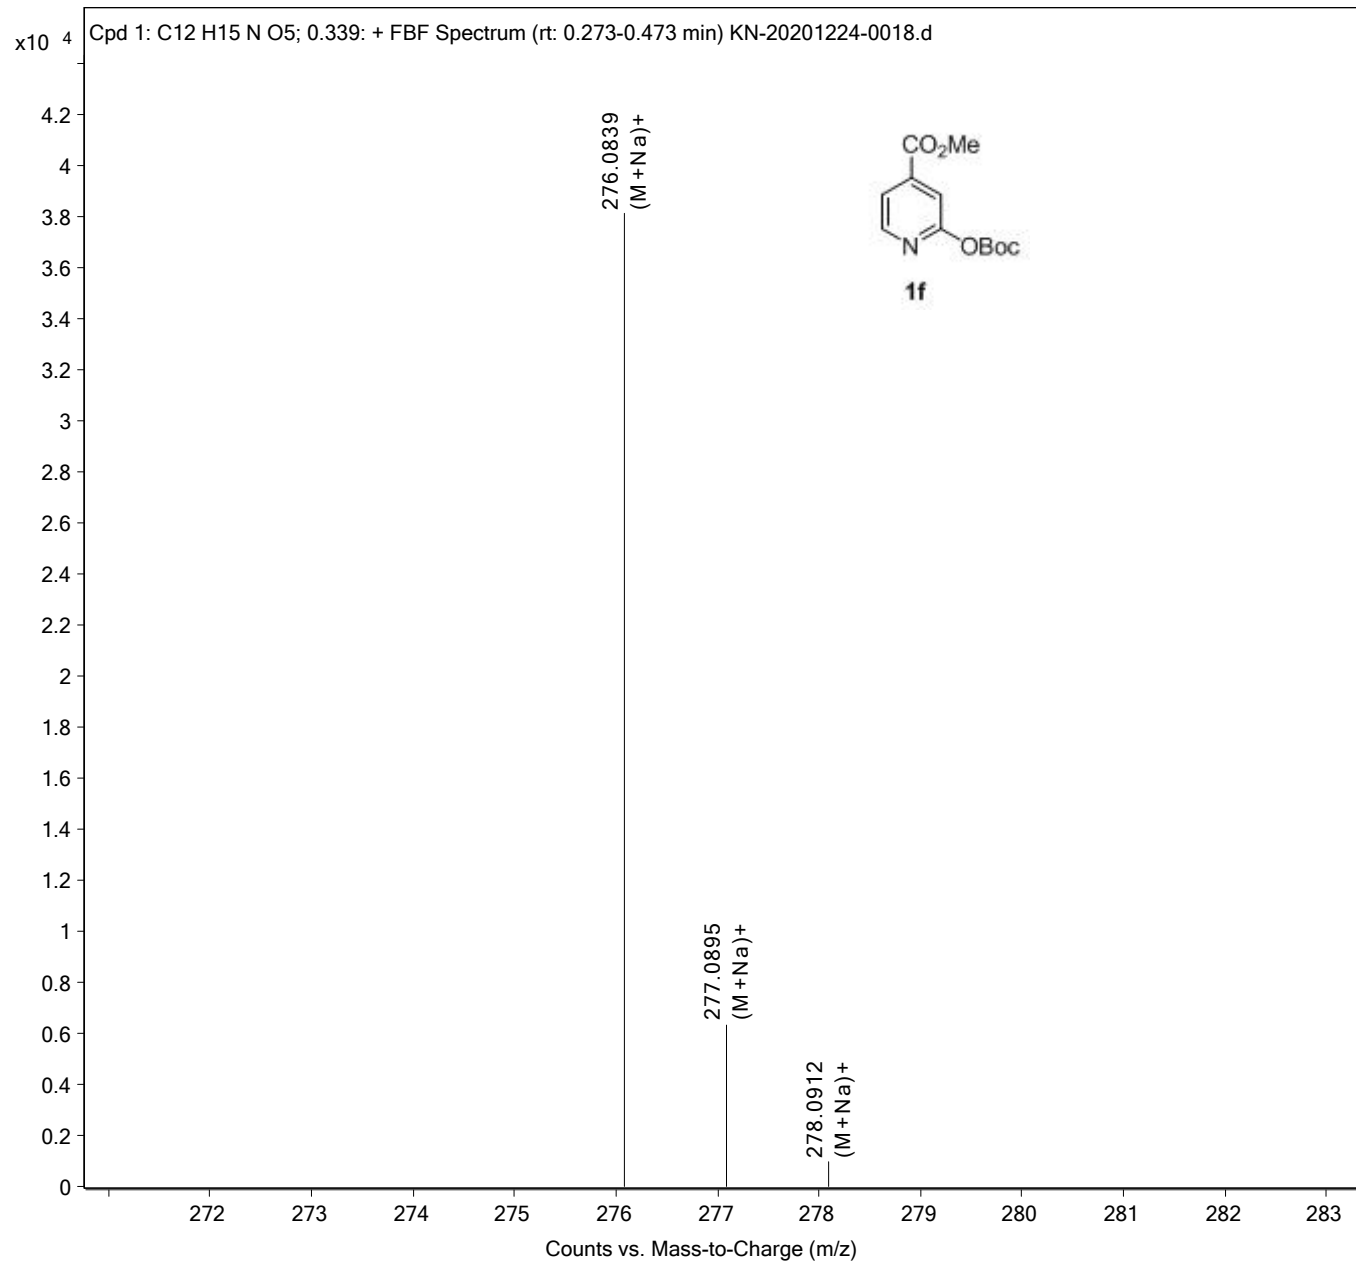



|                    |             |                               |         |                        |                                   |
|--------------------|-------------|-------------------------------|---------|------------------------|-----------------------------------|
| <b>Sample Name</b> | Sample45    | <b>Position</b>               | P1-E1   | <b>Instrument Name</b> | Instrument 1                      |
| <b>User Name</b>   |             | <b>Inj Vol</b>                | 1       | <b>InjPosition</b>     |                                   |
| <b>Sample Type</b> | Sample      | <b>IRM Calibration Status</b> | Success | <b>Data Filename</b>   | KN-20201224-0001.d                |
| <b>ACQ Method</b>  | NOZHUNOUV.m | <b>Comment</b>                |         | <b>Acquired Time</b>   | 12/24/2020 1:16:08 PM (UTC+08:00) |

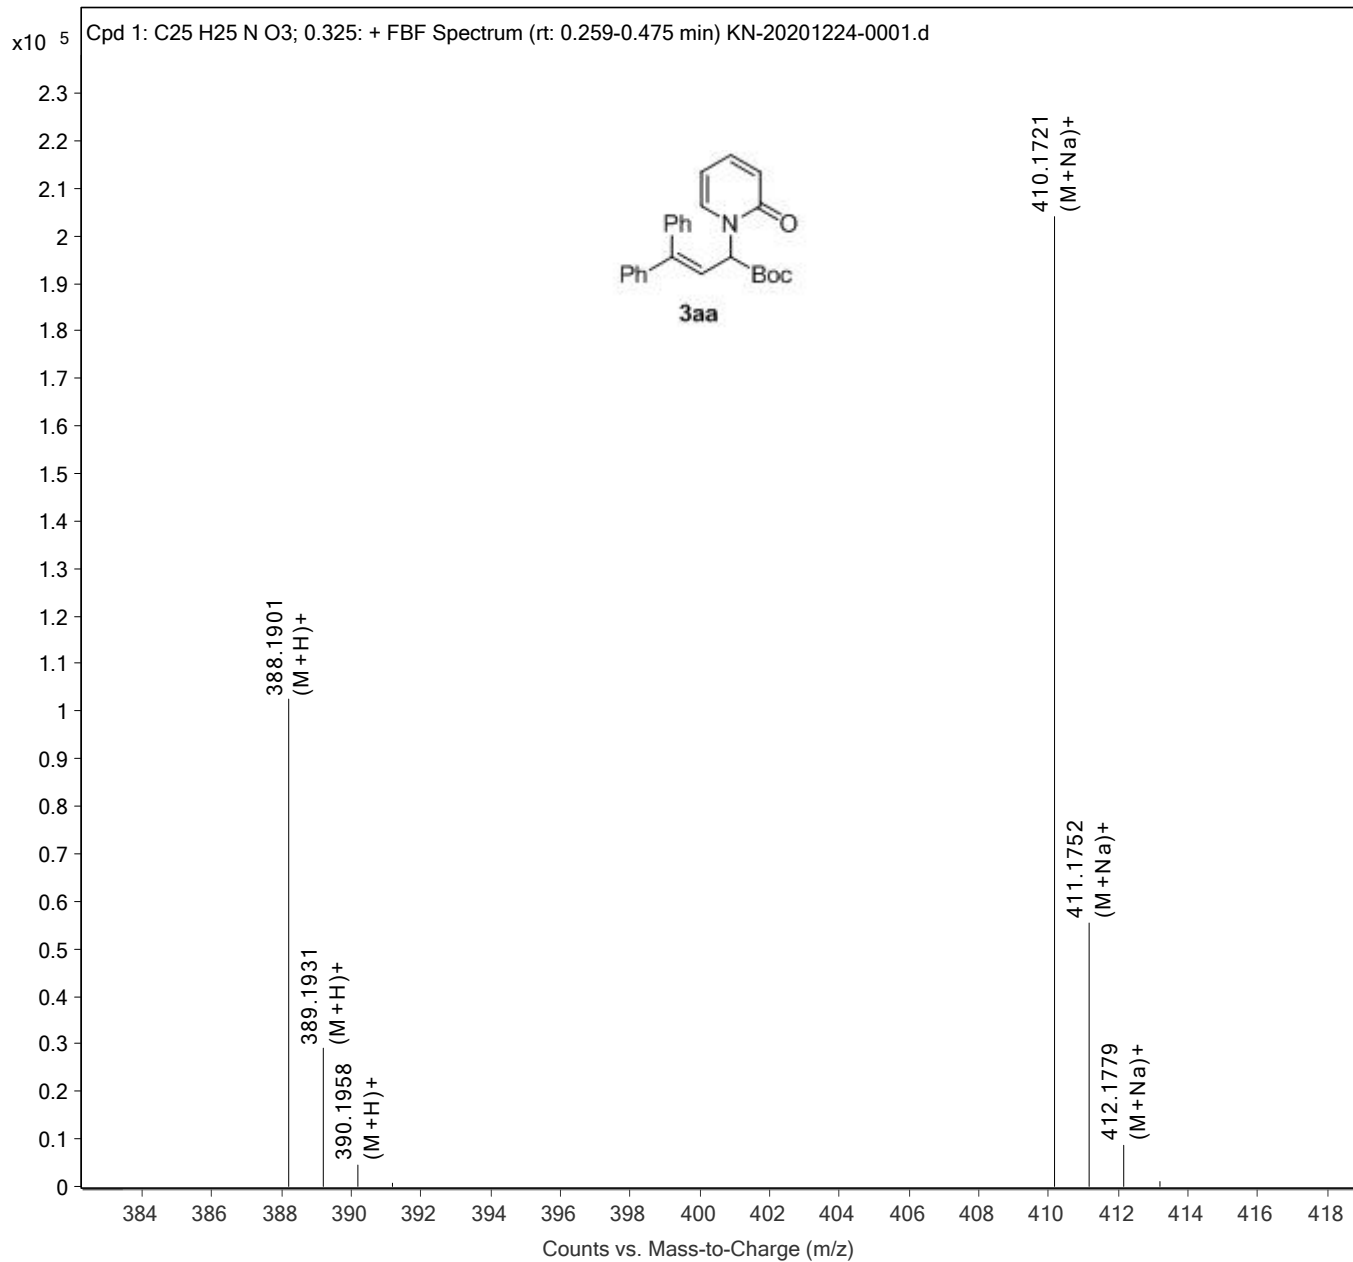

|                    |          |                               |         |                        |                                   |
|--------------------|----------|-------------------------------|---------|------------------------|-----------------------------------|
| <b>Sample Name</b> | Sample12 | <b>Position</b>               | P2-B2   | <b>Instrument Name</b> | Instrument 1                      |
| <b>User Name</b>   |          | <b>Inj Vol</b>                | 1       | <b>InjPosition</b>     |                                   |
| <b>Sample Type</b> | Sample   | <b>IRM Calibration Status</b> | Success | <b>Data Filename</b>   | CHL-20210524--0002.d              |
| <b>ACQ Method</b>  | NOZHU.m  | <b>Comment</b>                |         | <b>Acquired Time</b>   | 5/24/2021 11:33:27 AM (UTC+08:00) |

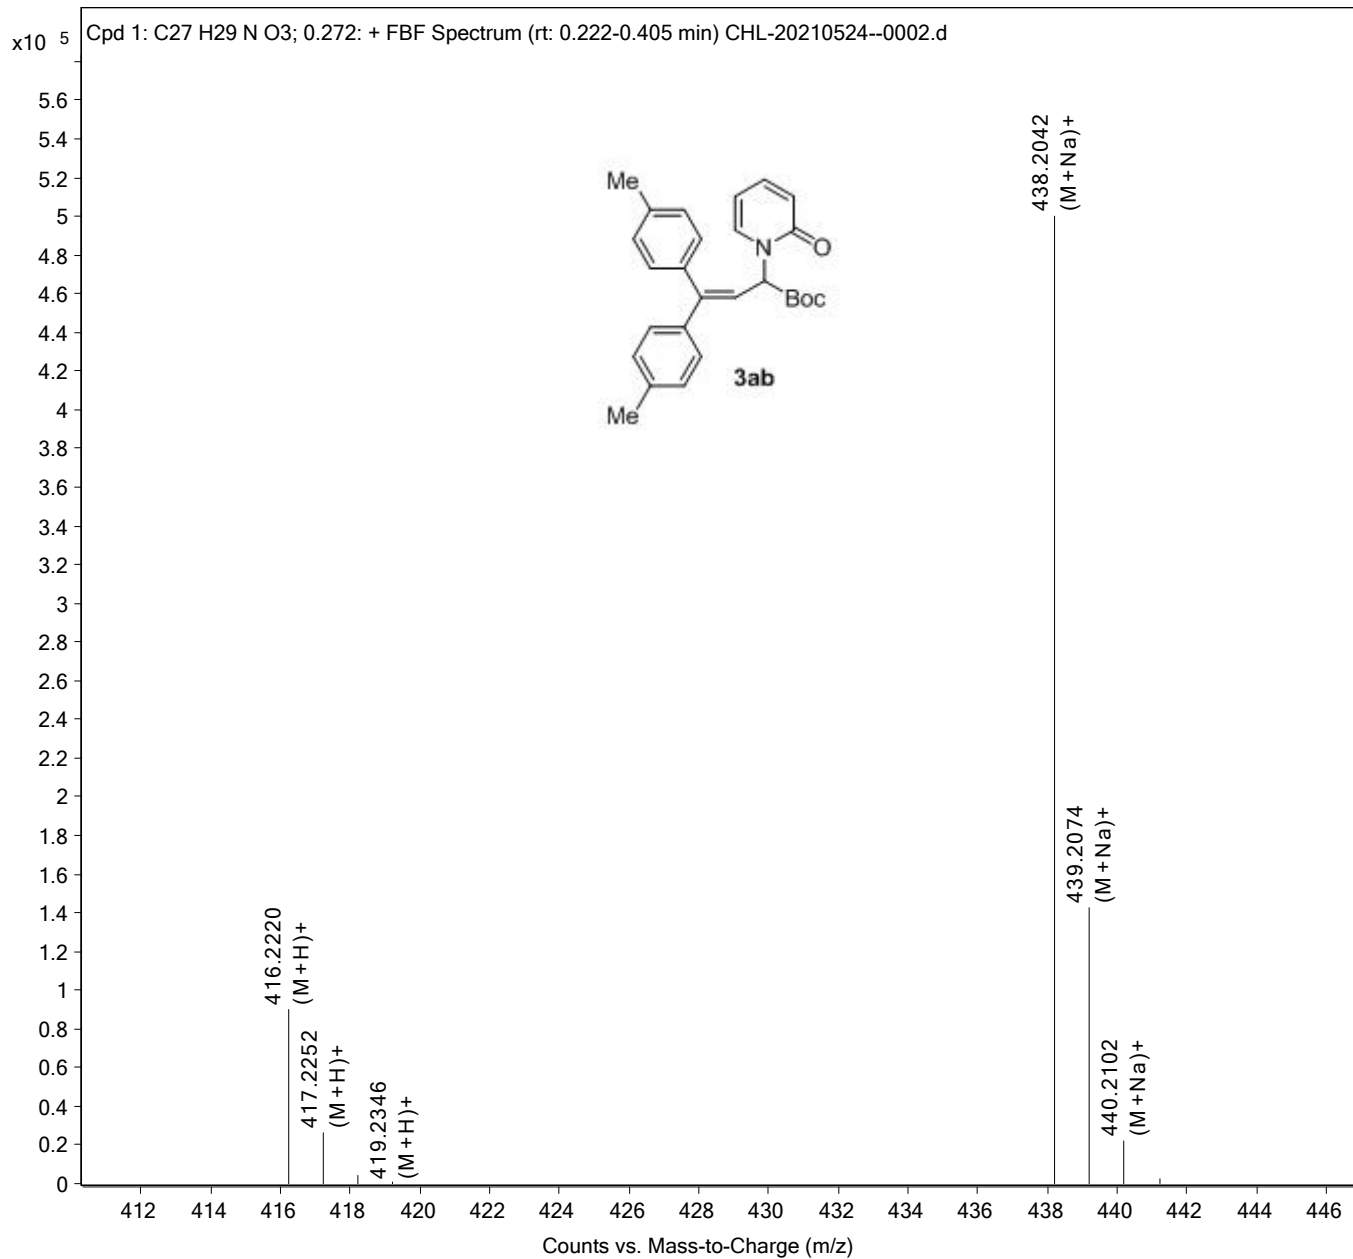

|                    |          |                               |         |                        |                                   |
|--------------------|----------|-------------------------------|---------|------------------------|-----------------------------------|
| <b>Sample Name</b> | Sample13 | <b>Position</b>               | P2-B3   | <b>Instrument Name</b> | Instrument 1                      |
| <b>User Name</b>   |          | <b>Inj Vol</b>                | 1       | <b>InjPosition</b>     |                                   |
| <b>Sample Type</b> | Sample   | <b>IRM Calibration Status</b> | Success | <b>Data Filename</b>   | CHL-20210524--0003.d              |
| <b>ACQ Method</b>  | NOZHU.m  | <b>Comment</b>                |         | <b>Acquired Time</b>   | 5/24/2021 11:35:04 AM (UTC+08:00) |

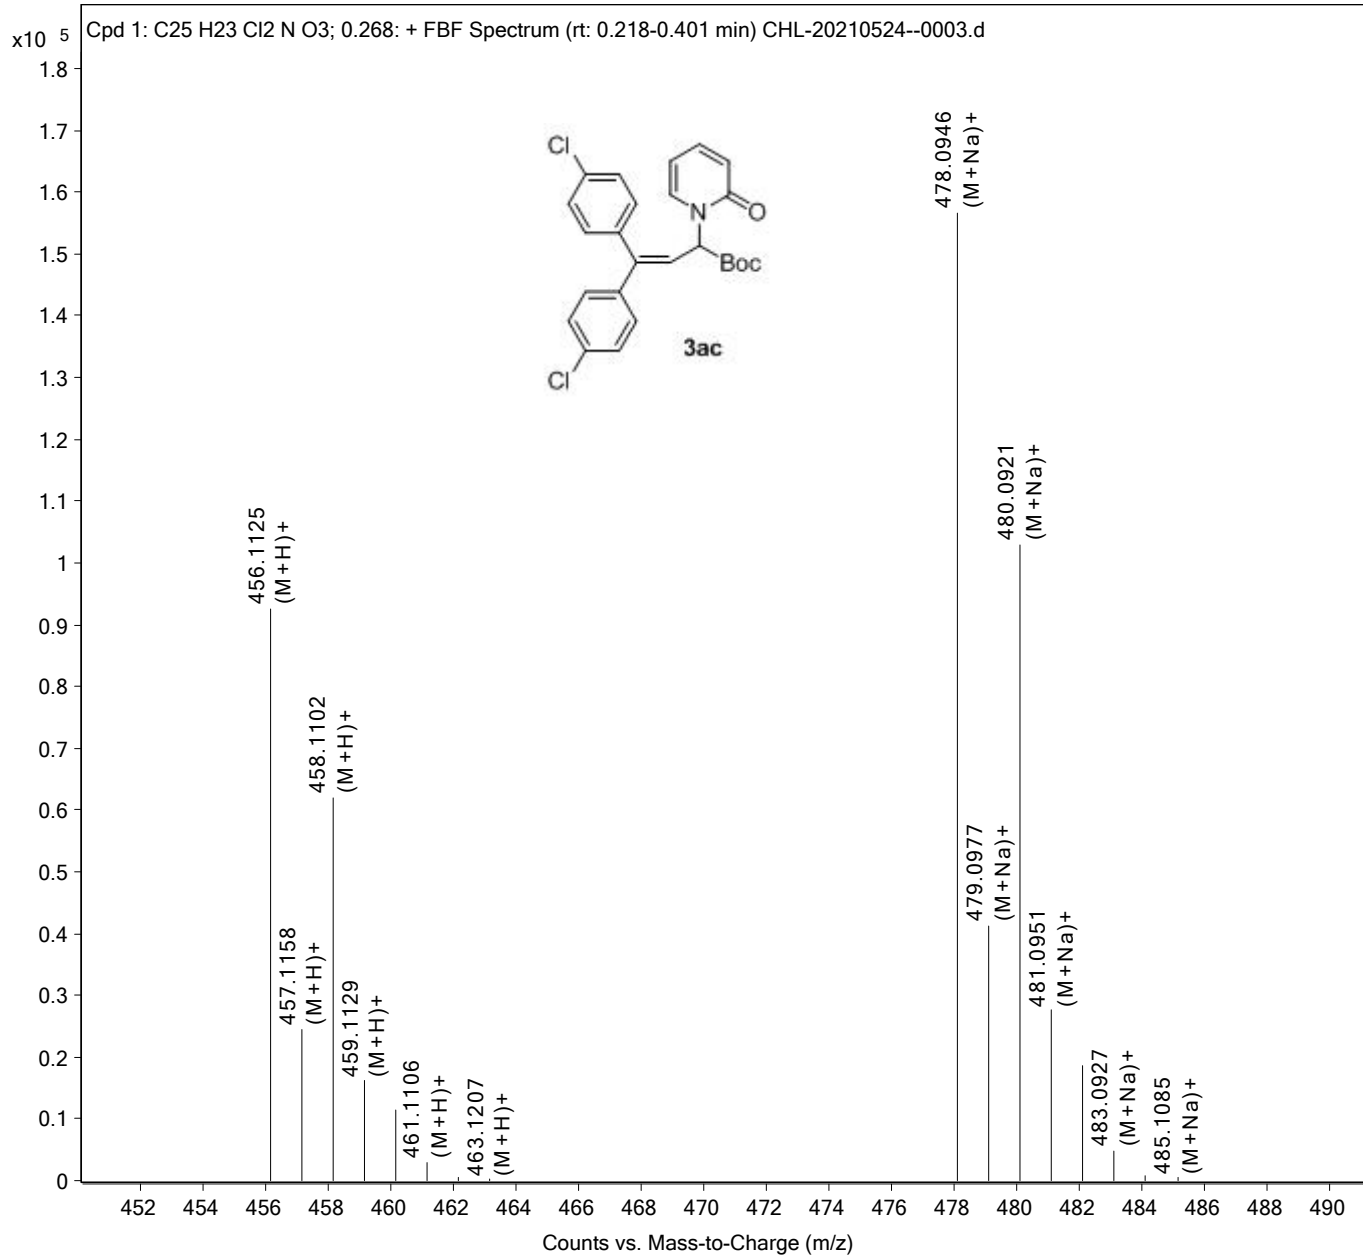

|                    |             |                               |         |                        |                                   |
|--------------------|-------------|-------------------------------|---------|------------------------|-----------------------------------|
| <b>Sample Name</b> | Sample61    | <b>Position</b>               | P1-F6   | <b>Instrument Name</b> | Instrument 1                      |
| <b>User Name</b>   |             | <b>Inj Vol</b>                | 1       | <b>InjPosition</b>     |                                   |
| <b>Sample Type</b> | Sample      | <b>IRM Calibration Status</b> | Success | <b>Data Filename</b>   | KN-20201224-0017.d                |
| <b>ACQ Method</b>  | NOZHUNOUV.m | <b>Comment</b>                |         | <b>Acquired Time</b>   | 12/24/2020 1:43:13 PM (UTC+08:00) |

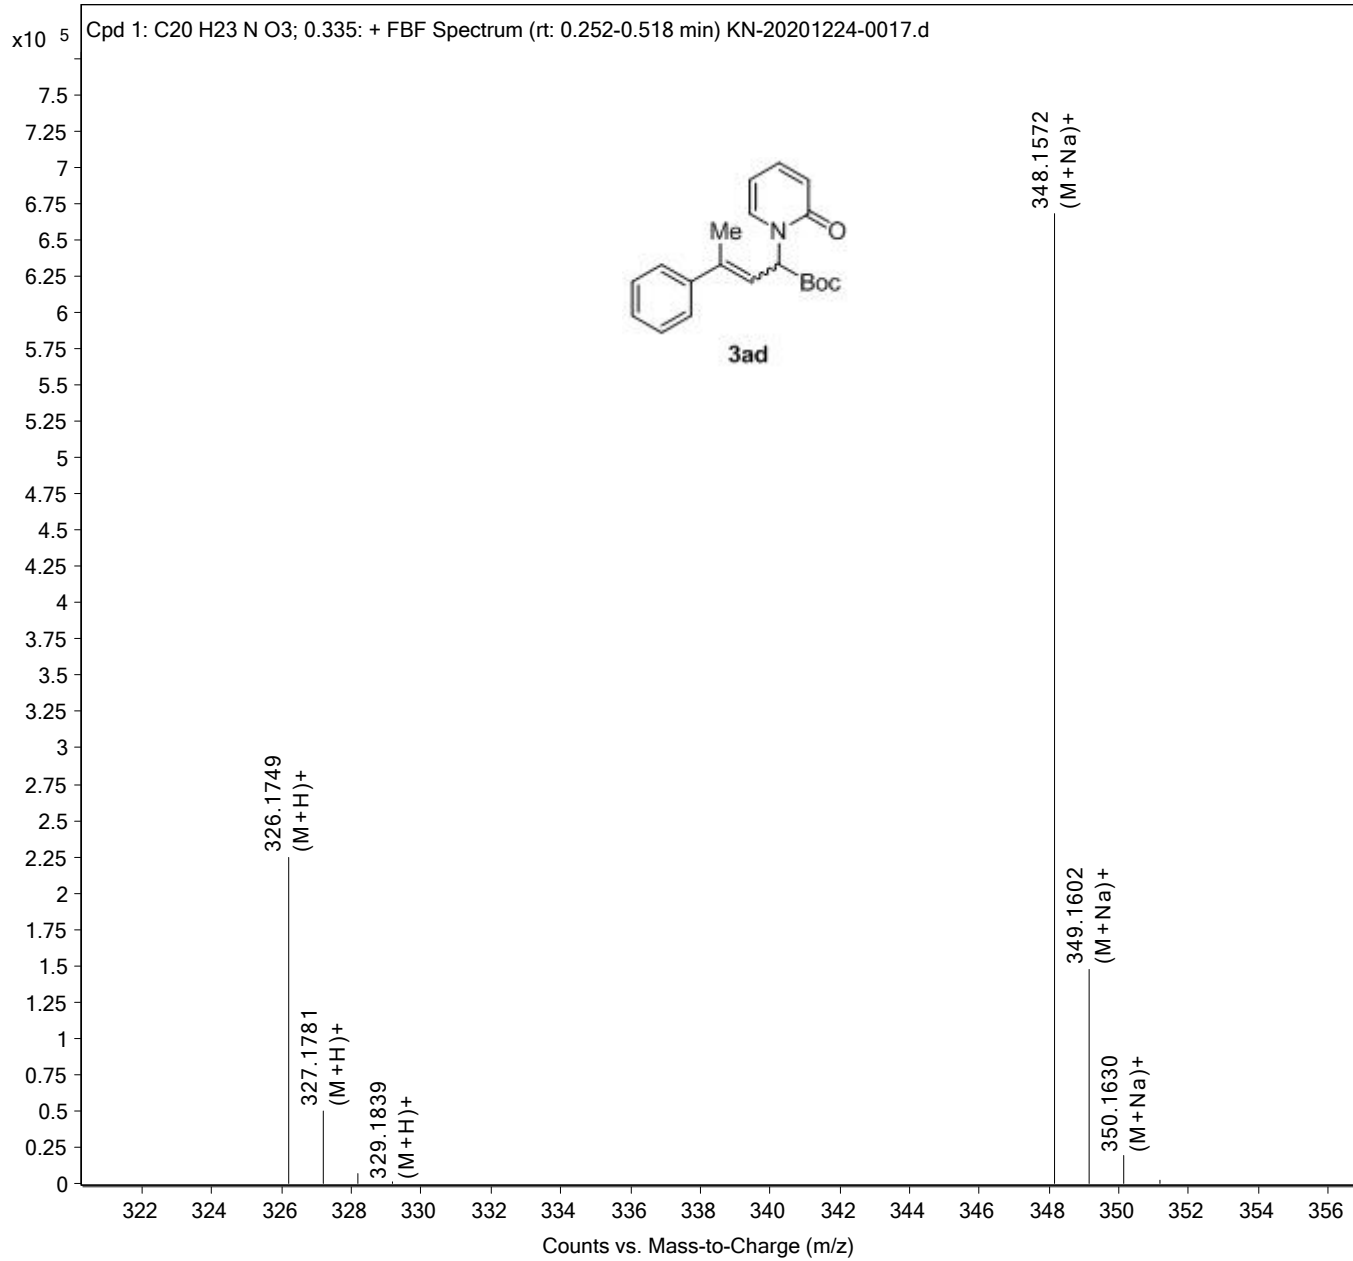

|                    |          |                               |         |                        |                                   |
|--------------------|----------|-------------------------------|---------|------------------------|-----------------------------------|
| <b>Sample Name</b> | Sample24 | <b>Position</b>               | P2-C3   | <b>Instrument Name</b> | Instrument 1                      |
| <b>User Name</b>   |          | <b>Inj Vol</b>                | 1       | <b>InjPosition</b>     |                                   |
| <b>Sample Type</b> | Sample   | <b>IRM Calibration Status</b> | Success | <b>Data Filename</b>   | CHL-20210524--0014.d              |
| <b>ACQ Method</b>  | NOZHU.m  | <b>Comment</b>                |         | <b>Acquired Time</b>   | 5/24/2021 11:52:54 AM (UTC+08:00) |

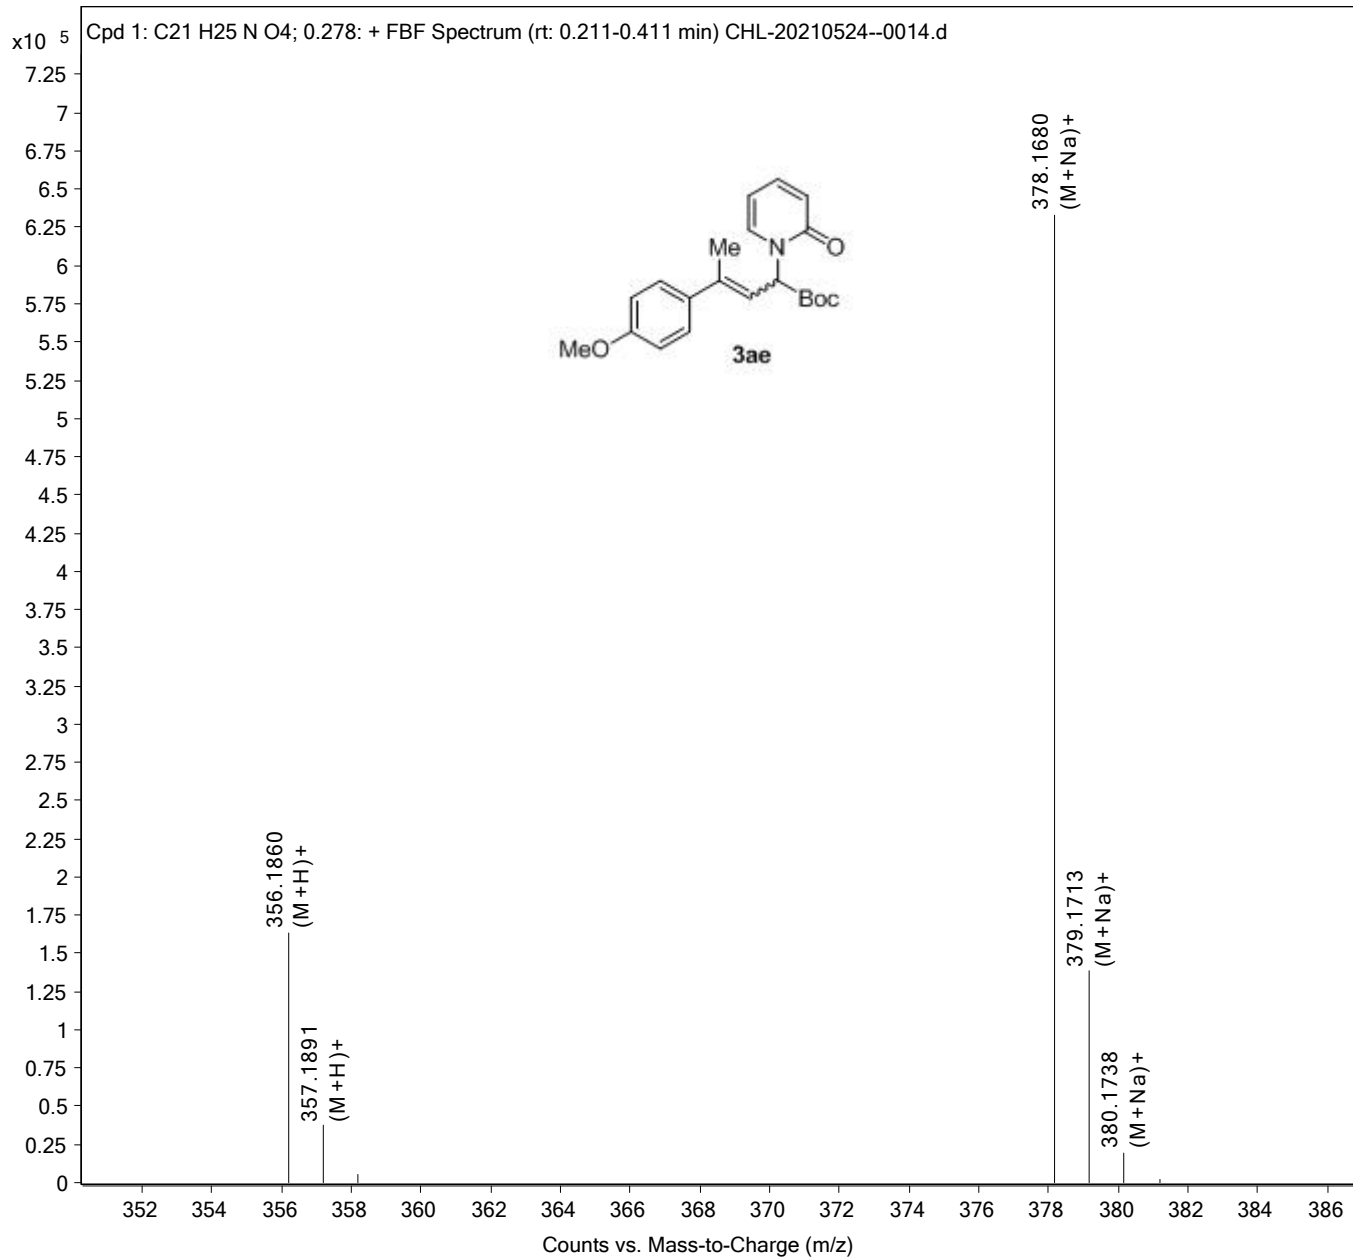

|                    |          |                               |         |                        |                                   |
|--------------------|----------|-------------------------------|---------|------------------------|-----------------------------------|
| <b>Sample Name</b> | Sample26 | <b>Position</b>               | P2-C5   | <b>Instrument Name</b> | Instrument 1                      |
| <b>User Name</b>   |          | <b>Inj Vol</b>                | 1       | <b>InjPosition</b>     |                                   |
| <b>Sample Type</b> | Sample   | <b>IRM Calibration Status</b> | Success | <b>Data Filename</b>   | CHL-20210524--0016.d              |
| <b>ACQ Method</b>  | NOZHU.m  | <b>Comment</b>                |         | <b>Acquired Time</b>   | 5/24/2021 11:56:08 AM (UTC+08:00) |

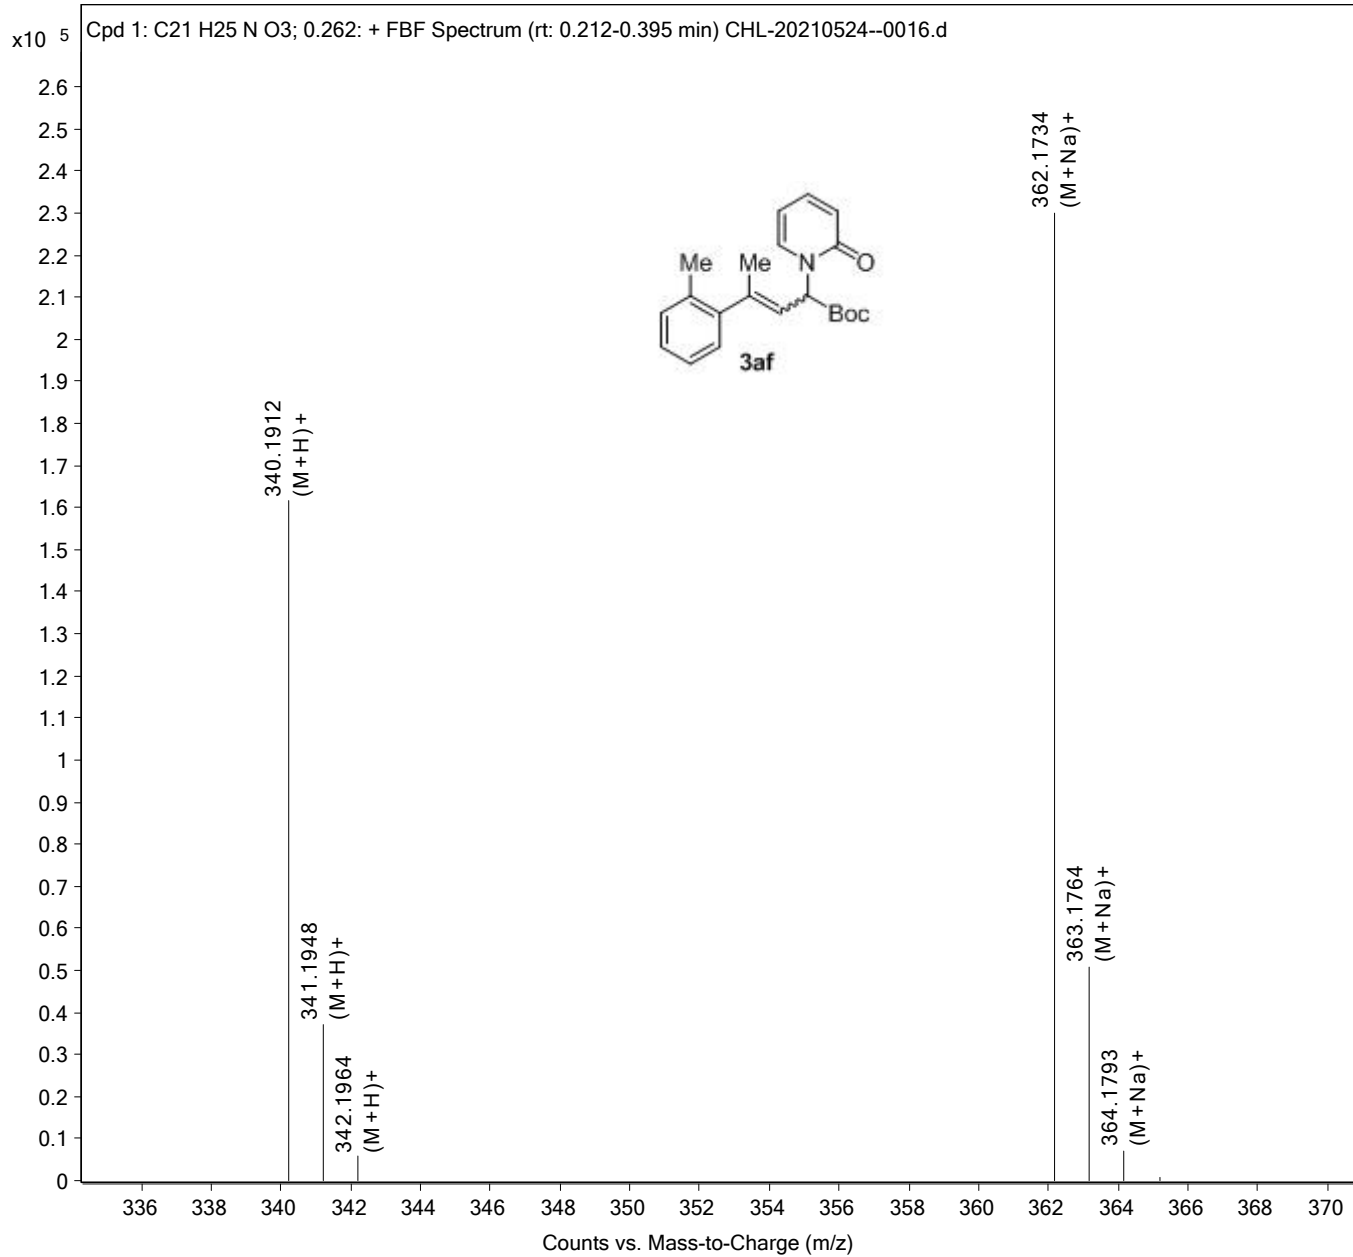

|                    |          |                               |         |                        |                                   |
|--------------------|----------|-------------------------------|---------|------------------------|-----------------------------------|
| <b>Sample Name</b> | Sample25 | <b>Position</b>               | P2-C4   | <b>Instrument Name</b> | Instrument 1                      |
| <b>User Name</b>   |          | <b>Inj Vol</b>                | 1       | <b>InjPosition</b>     |                                   |
| <b>Sample Type</b> | Sample   | <b>IRM Calibration Status</b> | Success | <b>Data Filename</b>   | CHL-20210524--0015.d              |
| <b>ACQ Method</b>  | NOZHU.m  | <b>Comment</b>                |         | <b>Acquired Time</b>   | 5/24/2021 11:54:31 AM (UTC+08:00) |

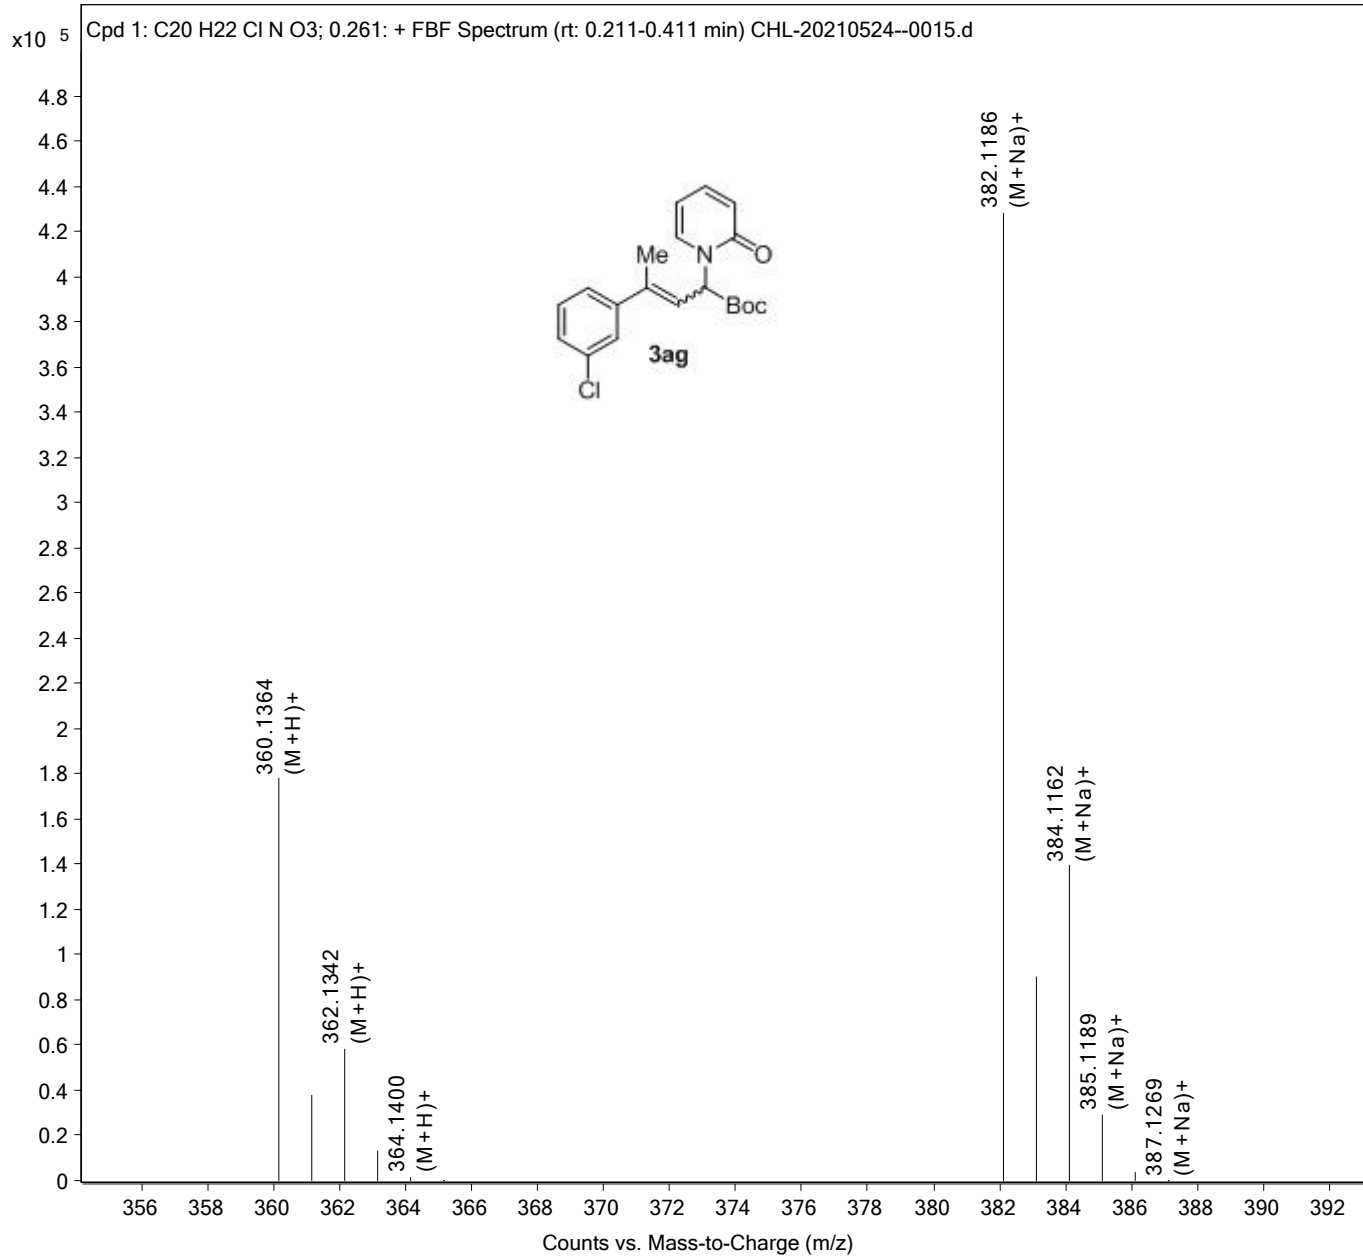

|                    |          |                               |         |                        |                                   |
|--------------------|----------|-------------------------------|---------|------------------------|-----------------------------------|
| <b>Sample Name</b> | Sample20 | <b>Position</b>               | P2-B10  | <b>Instrument Name</b> | Instrument 1                      |
| <b>User Name</b>   |          | <b>Inj Vol</b>                | 1       | <b>InjPosition</b>     |                                   |
| <b>Sample Type</b> | Sample   | <b>IRM Calibration Status</b> | Success | <b>Data Filename</b>   | CHL-20210524--0010.d              |
| <b>ACQ Method</b>  | NOZHU.m  | <b>Comment</b>                |         | <b>Acquired Time</b>   | 5/24/2021 11:46:22 AM (UTC+08:00) |

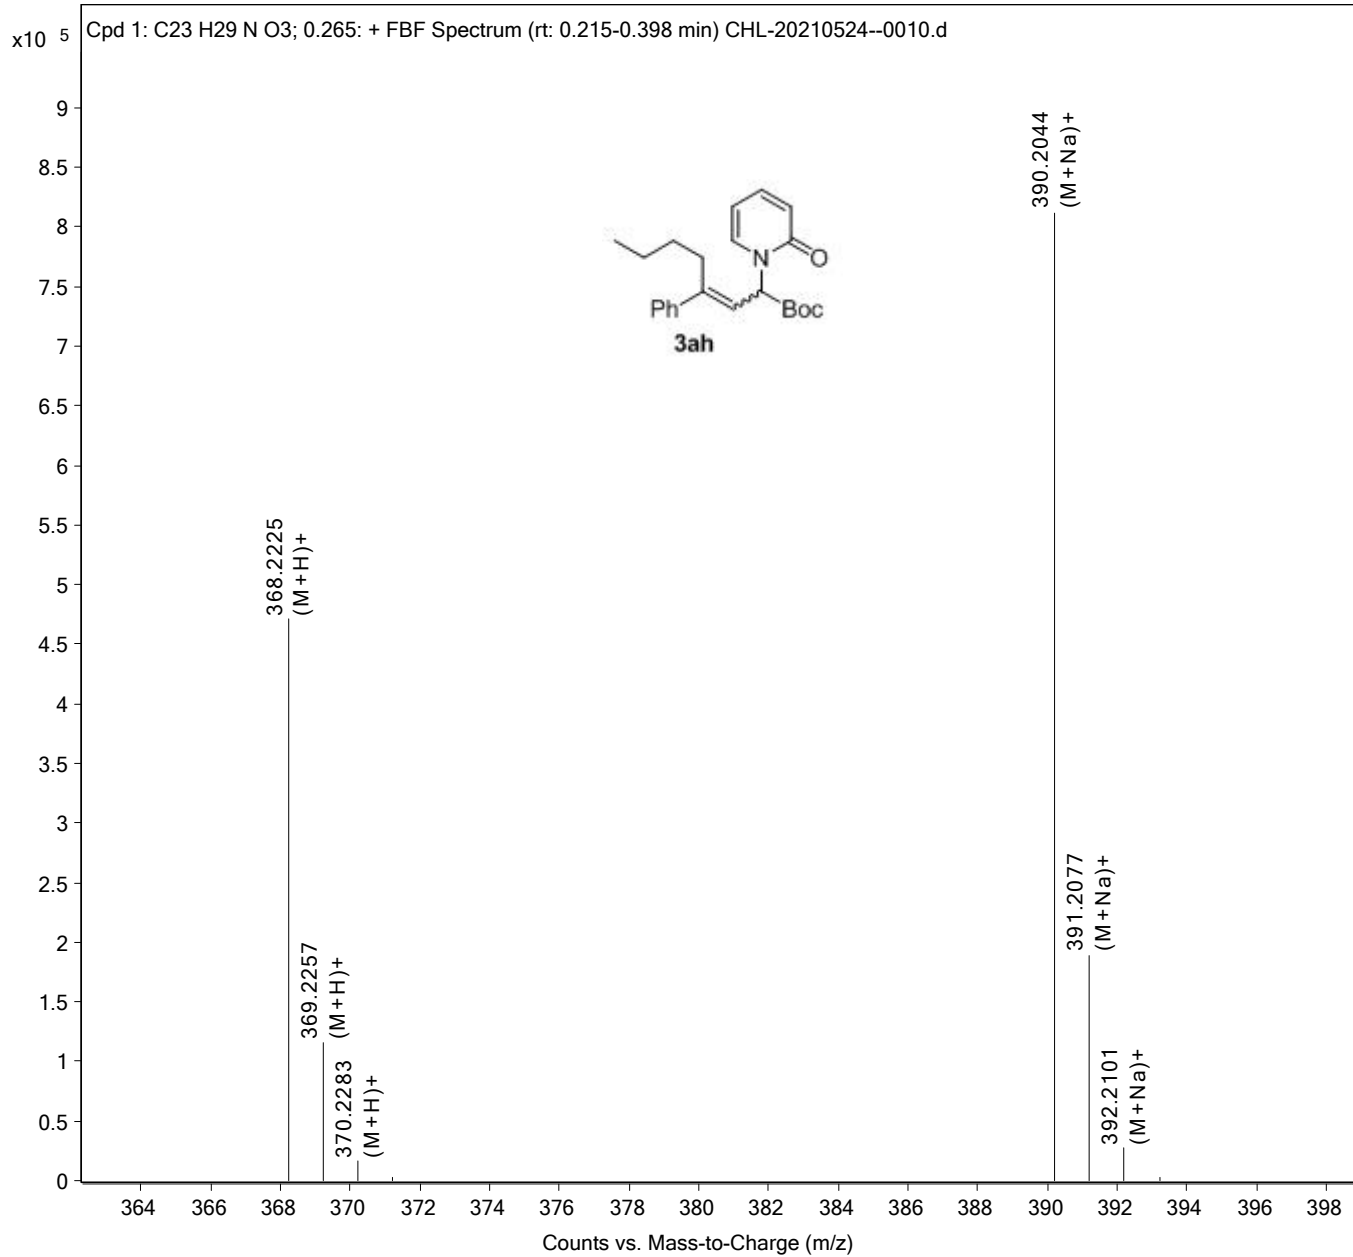



|                    |          |                               |         |                        |                                   |
|--------------------|----------|-------------------------------|---------|------------------------|-----------------------------------|
| <b>Sample Name</b> | Sample23 | <b>Position</b>               | P2-C2   | <b>Instrument Name</b> | Instrument 1                      |
| <b>User Name</b>   |          | <b>Inj Vol</b>                | 1       | <b>InjPosition</b>     |                                   |
| <b>Sample Type</b> | Sample   | <b>IRM Calibration Status</b> | Success | <b>Data Filename</b>   | CHL-20210524--0013.d              |
| <b>ACQ Method</b>  | NOZHU.m  | <b>Comment</b>                |         | <b>Acquired Time</b>   | 5/24/2021 11:51:17 AM (UTC+08:00) |

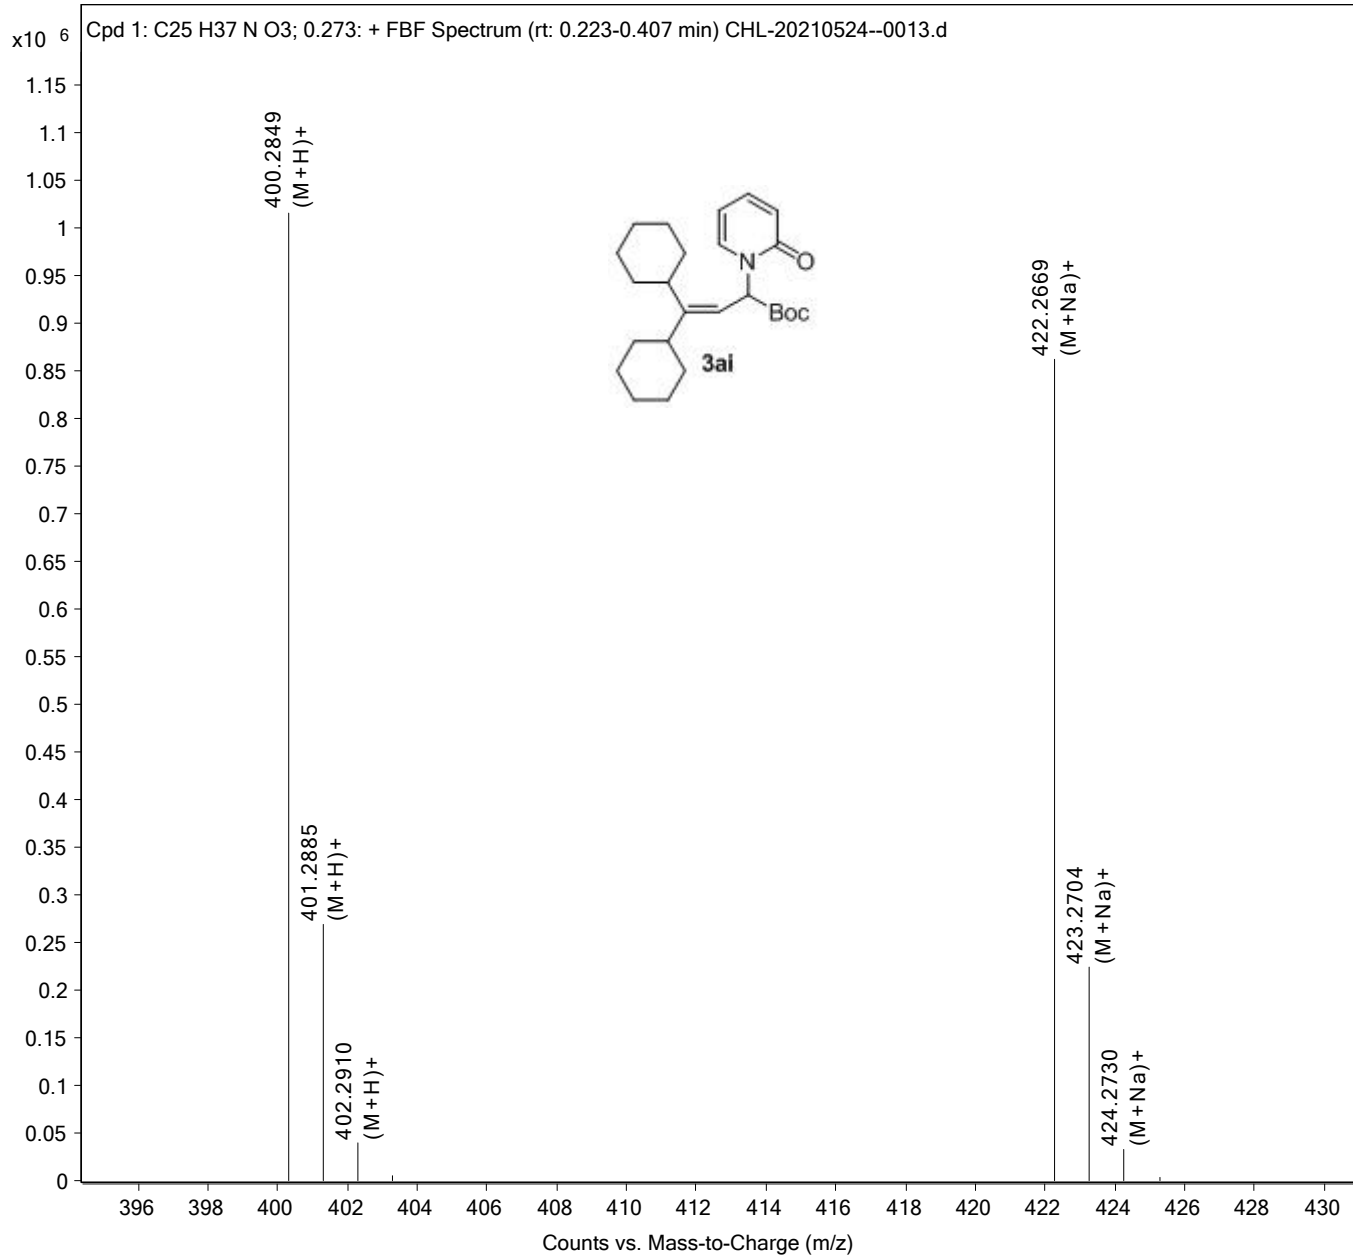

|                    |          |                               |         |                        |                                   |
|--------------------|----------|-------------------------------|---------|------------------------|-----------------------------------|
| <b>Sample Name</b> | Sample17 | <b>Position</b>               | P2-B7   | <b>Instrument Name</b> | Instrument 1                      |
| <b>User Name</b>   |          | <b>Inj Vol</b>                | 1       | <b>InjPosition</b>     |                                   |
| <b>Sample Type</b> | Sample   | <b>IRM Calibration Status</b> | Success | <b>Data Filename</b>   | CHL-20210524--0007.d              |
| <b>ACQ Method</b>  | NOZHU.m  | <b>Comment</b>                |         | <b>Acquired Time</b>   | 5/24/2021 11:41:32 AM (UTC+08:00) |

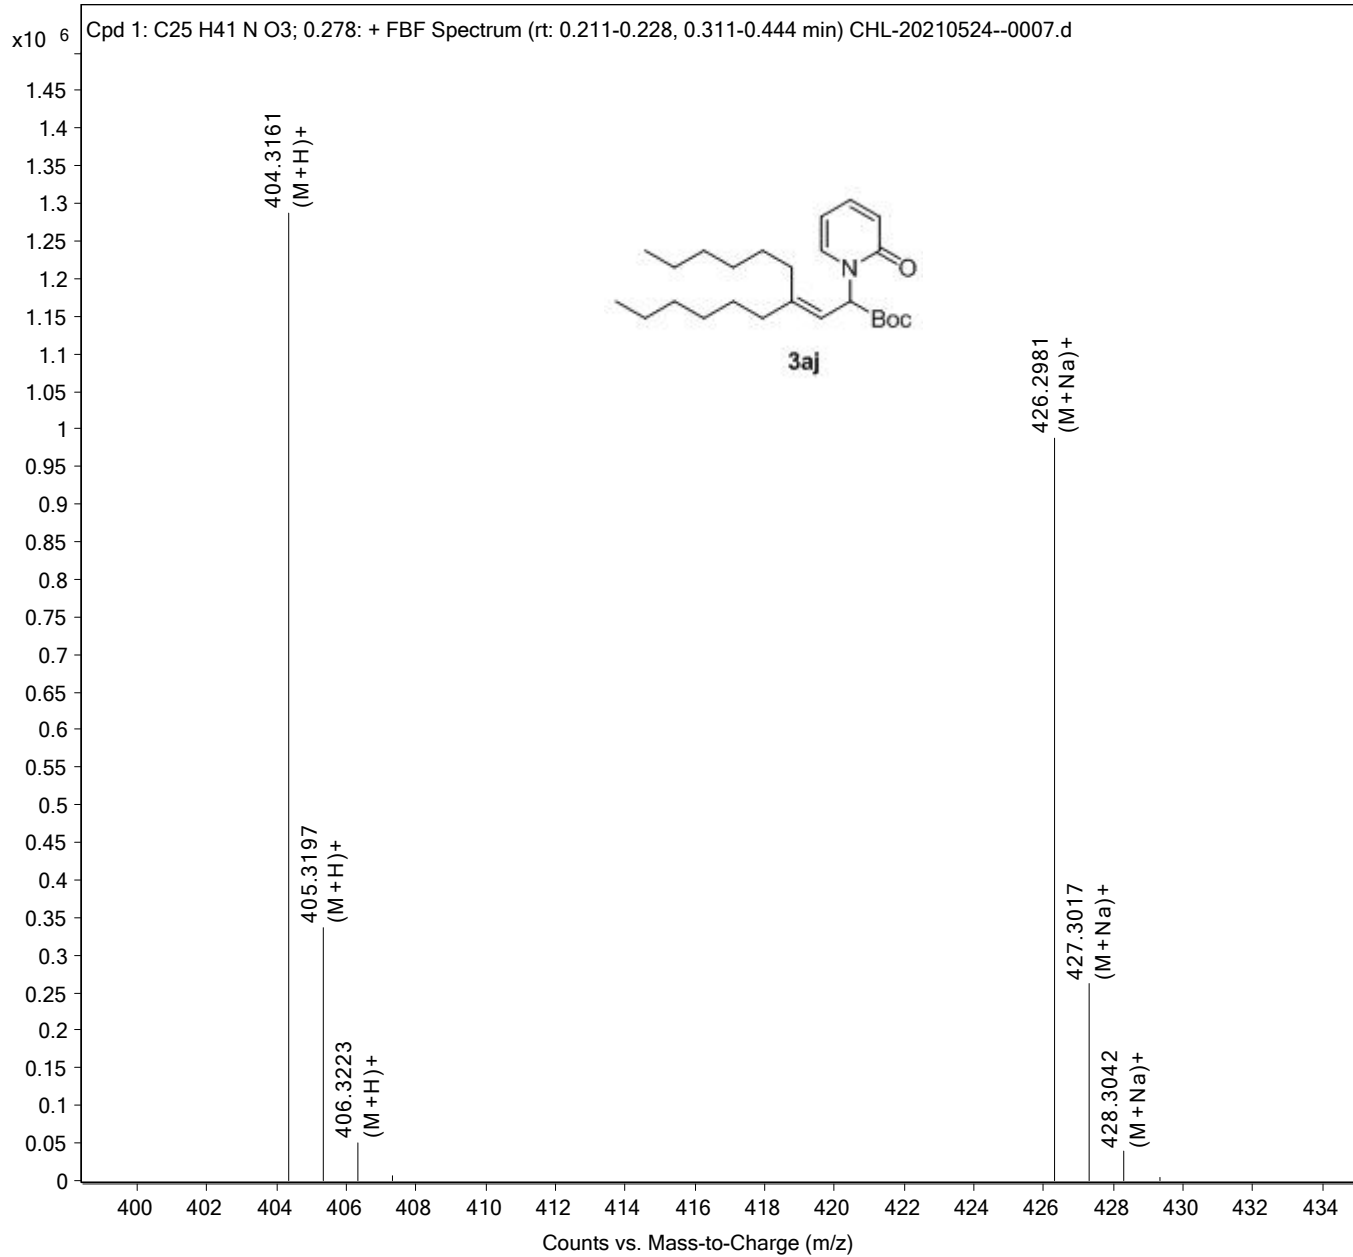

|                    |          |                               |         |                        |                                   |
|--------------------|----------|-------------------------------|---------|------------------------|-----------------------------------|
| <b>Sample Name</b> | Sample21 | <b>Position</b>               | P2-B11  | <b>Instrument Name</b> | Instrument 1                      |
| <b>User Name</b>   |          | <b>Inj Vol</b>                | 1       | <b>InjPosition</b>     |                                   |
| <b>Sample Type</b> | Sample   | <b>IRM Calibration Status</b> | Success | <b>Data Filename</b>   | CHL-20210524--0011.d              |
| <b>ACQ Method</b>  | NOZHU.m  | <b>Comment</b>                |         | <b>Acquired Time</b>   | 5/24/2021 11:47:59 AM (UTC+08:00) |

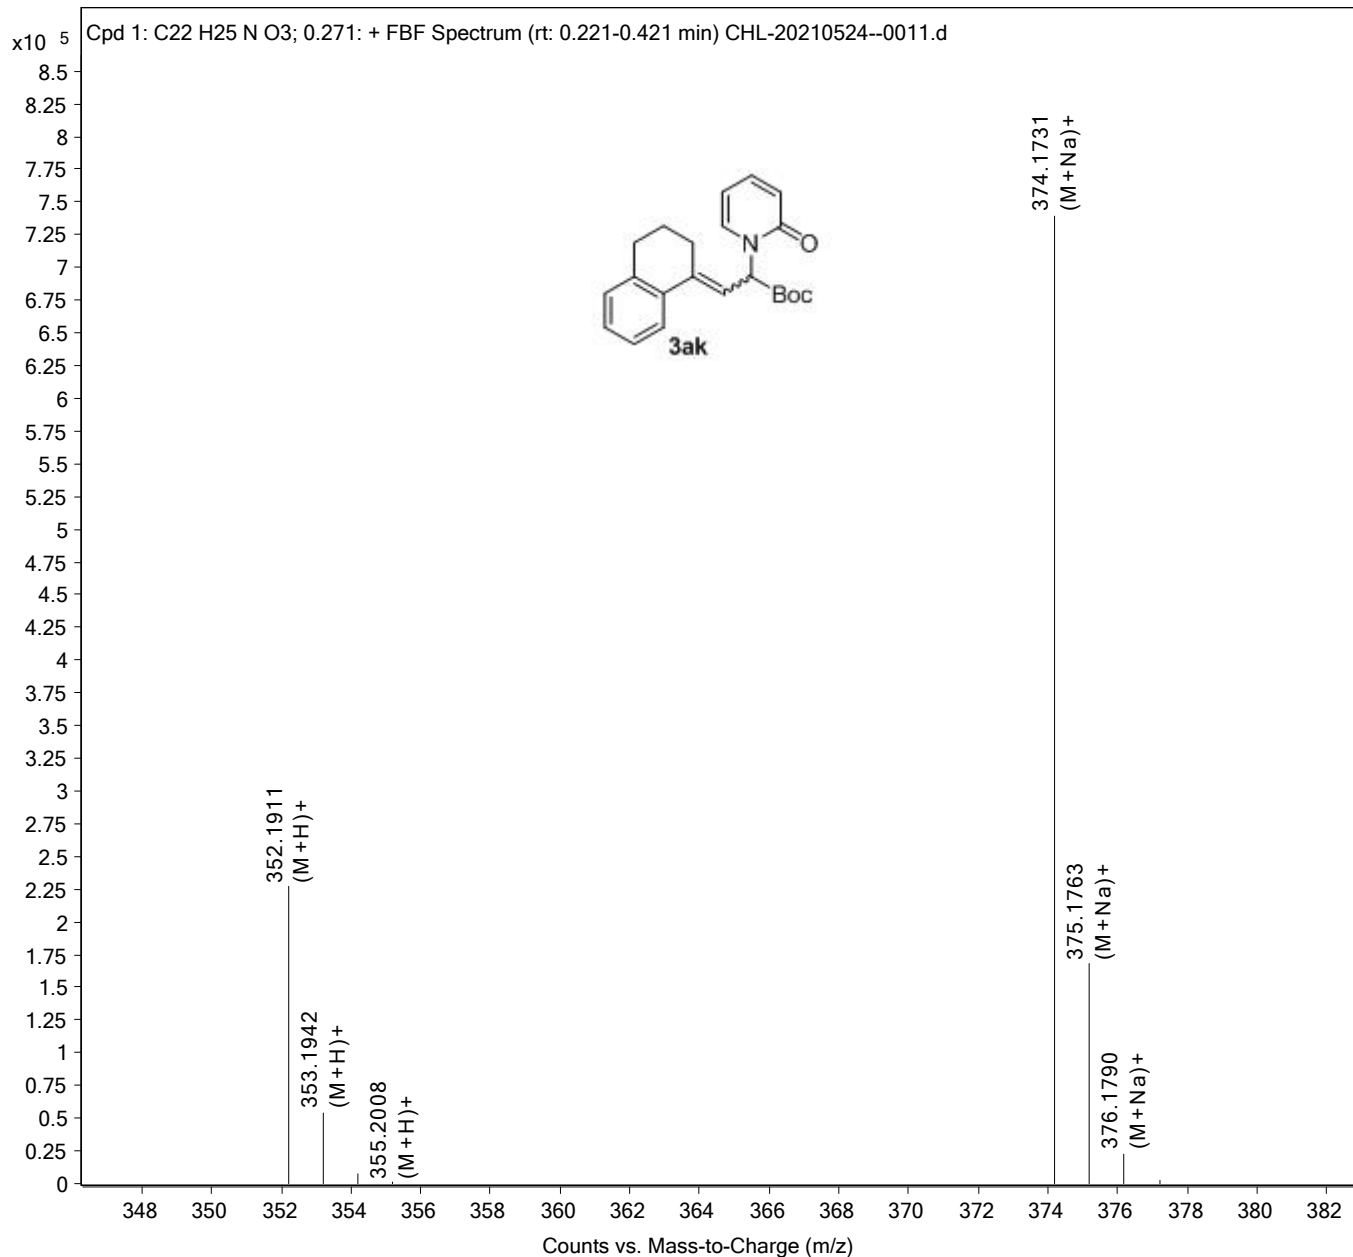

|                    |          |                               |         |                        |                                   |
|--------------------|----------|-------------------------------|---------|------------------------|-----------------------------------|
| <b>Sample Name</b> | Sample16 | <b>Position</b>               | P2-B6   | <b>Instrument Name</b> | Instrument 1                      |
| <b>User Name</b>   |          | <b>Inj Vol</b>                | 1       | <b>InjPosition</b>     |                                   |
| <b>Sample Type</b> | Sample   | <b>IRM Calibration Status</b> | Success | <b>Data Filename</b>   | CHL-20210524--0006.d              |
| <b>ACQ Method</b>  | NOZHU.m  | <b>Comment</b>                |         | <b>Acquired Time</b>   | 5/24/2021 11:39:55 AM (UTC+08:00) |

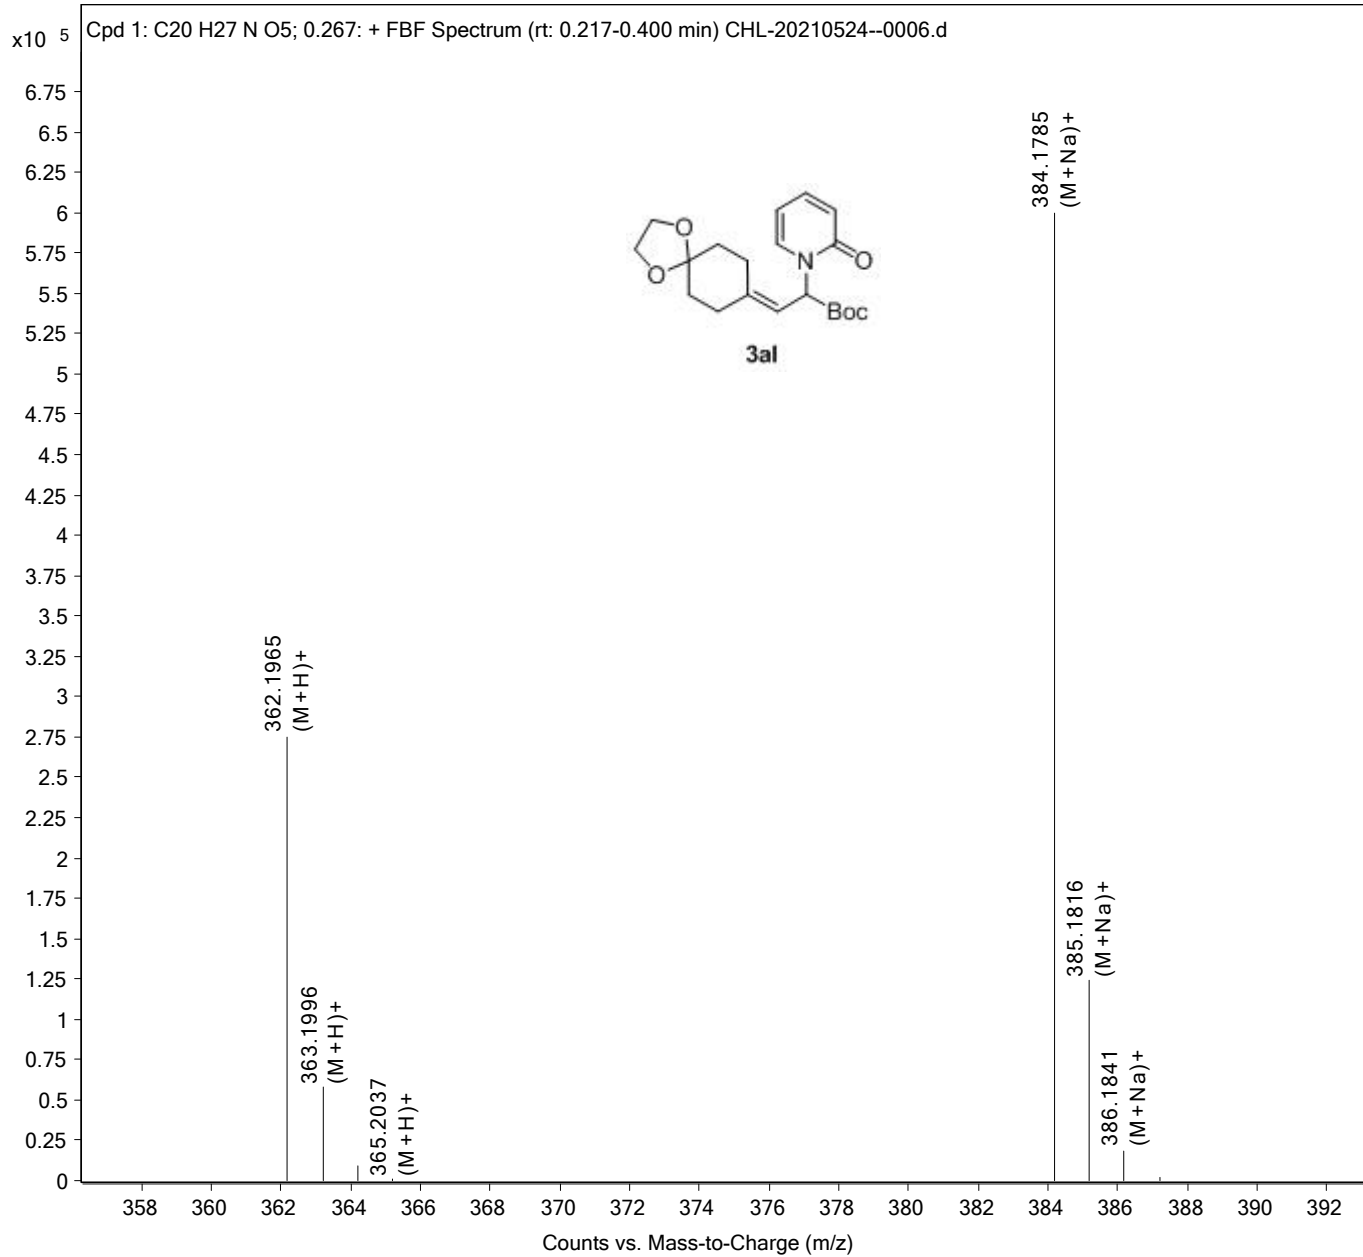

|                    |          |                               |         |                        |                                   |
|--------------------|----------|-------------------------------|---------|------------------------|-----------------------------------|
| <b>Sample Name</b> | Sample18 | <b>Position</b>               | P2-B8   | <b>Instrument Name</b> | Instrument 1                      |
| <b>User Name</b>   |          | <b>Inj Vol</b>                | 1       | <b>InjPosition</b>     |                                   |
| <b>Sample Type</b> | Sample   | <b>IRM Calibration Status</b> | Success | <b>Data Filename</b>   | CHL-20210524--0008.d              |
| <b>ACQ Method</b>  | NOZHU.m  | <b>Comment</b>                |         | <b>Acquired Time</b>   | 5/24/2021 11:43:09 AM (UTC+08:00) |

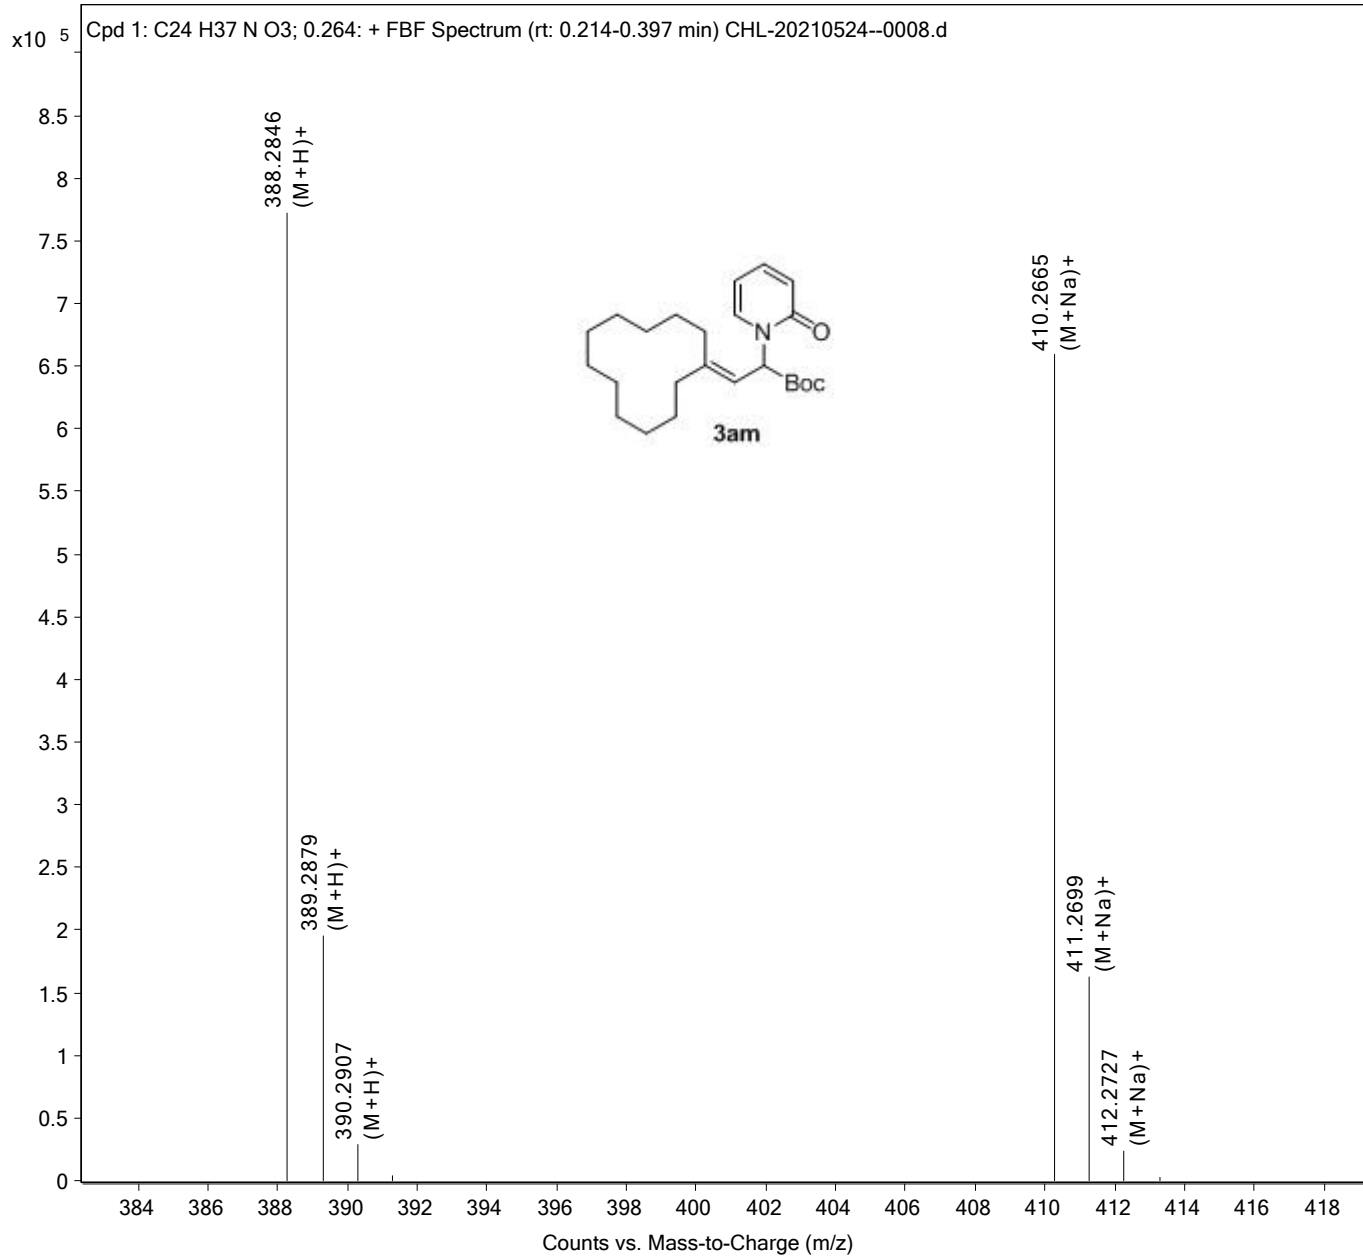

|                    |          |                               |         |                        |                                   |
|--------------------|----------|-------------------------------|---------|------------------------|-----------------------------------|
| <b>Sample Name</b> | Sample14 | <b>Position</b>               | P2-B4   | <b>Instrument Name</b> | Instrument 1                      |
| <b>User Name</b>   |          | <b>Inj Vol</b>                | 1       | <b>InjPosition</b>     |                                   |
| <b>Sample Type</b> | Sample   | <b>IRM Calibration Status</b> | Success | <b>Data Filename</b>   | CHL-20210524--0004.d              |
| <b>ACQ Method</b>  | NOZHU.m  | <b>Comment</b>                |         | <b>Acquired Time</b>   | 5/24/2021 11:36:41 AM (UTC+08:00) |

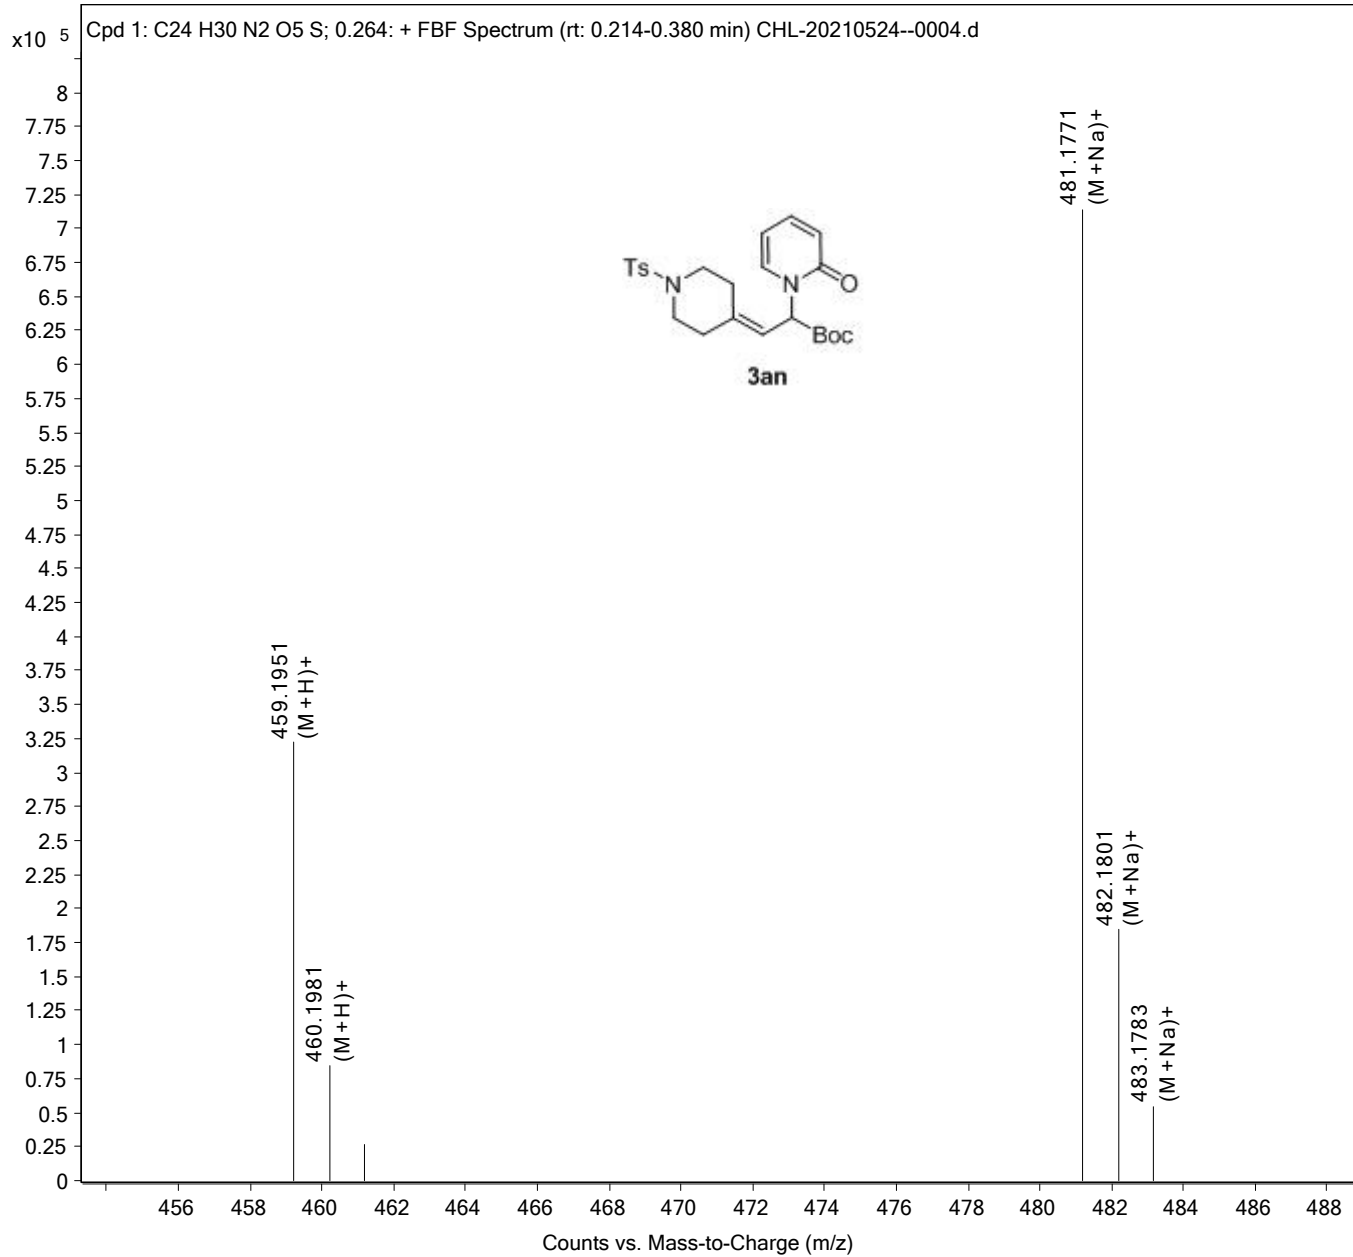

|                    |             |                               |         |                        |                                   |
|--------------------|-------------|-------------------------------|---------|------------------------|-----------------------------------|
| <b>Sample Name</b> | Sample46    | <b>Position</b>               | P1-E2   | <b>Instrument Name</b> | Instrument 1                      |
| <b>User Name</b>   |             | <b>Inj Vol</b>                | 1       | <b>InjPosition</b>     |                                   |
| <b>Sample Type</b> | Sample      | <b>IRM Calibration Status</b> | Success | <b>Data Filename</b>   | KN-20201224-0002.d                |
| <b>ACQ Method</b>  | NOZHUNOUV.m | <b>Comment</b>                |         | <b>Acquired Time</b>   | 12/24/2020 1:17:46 PM (UTC+08:00) |

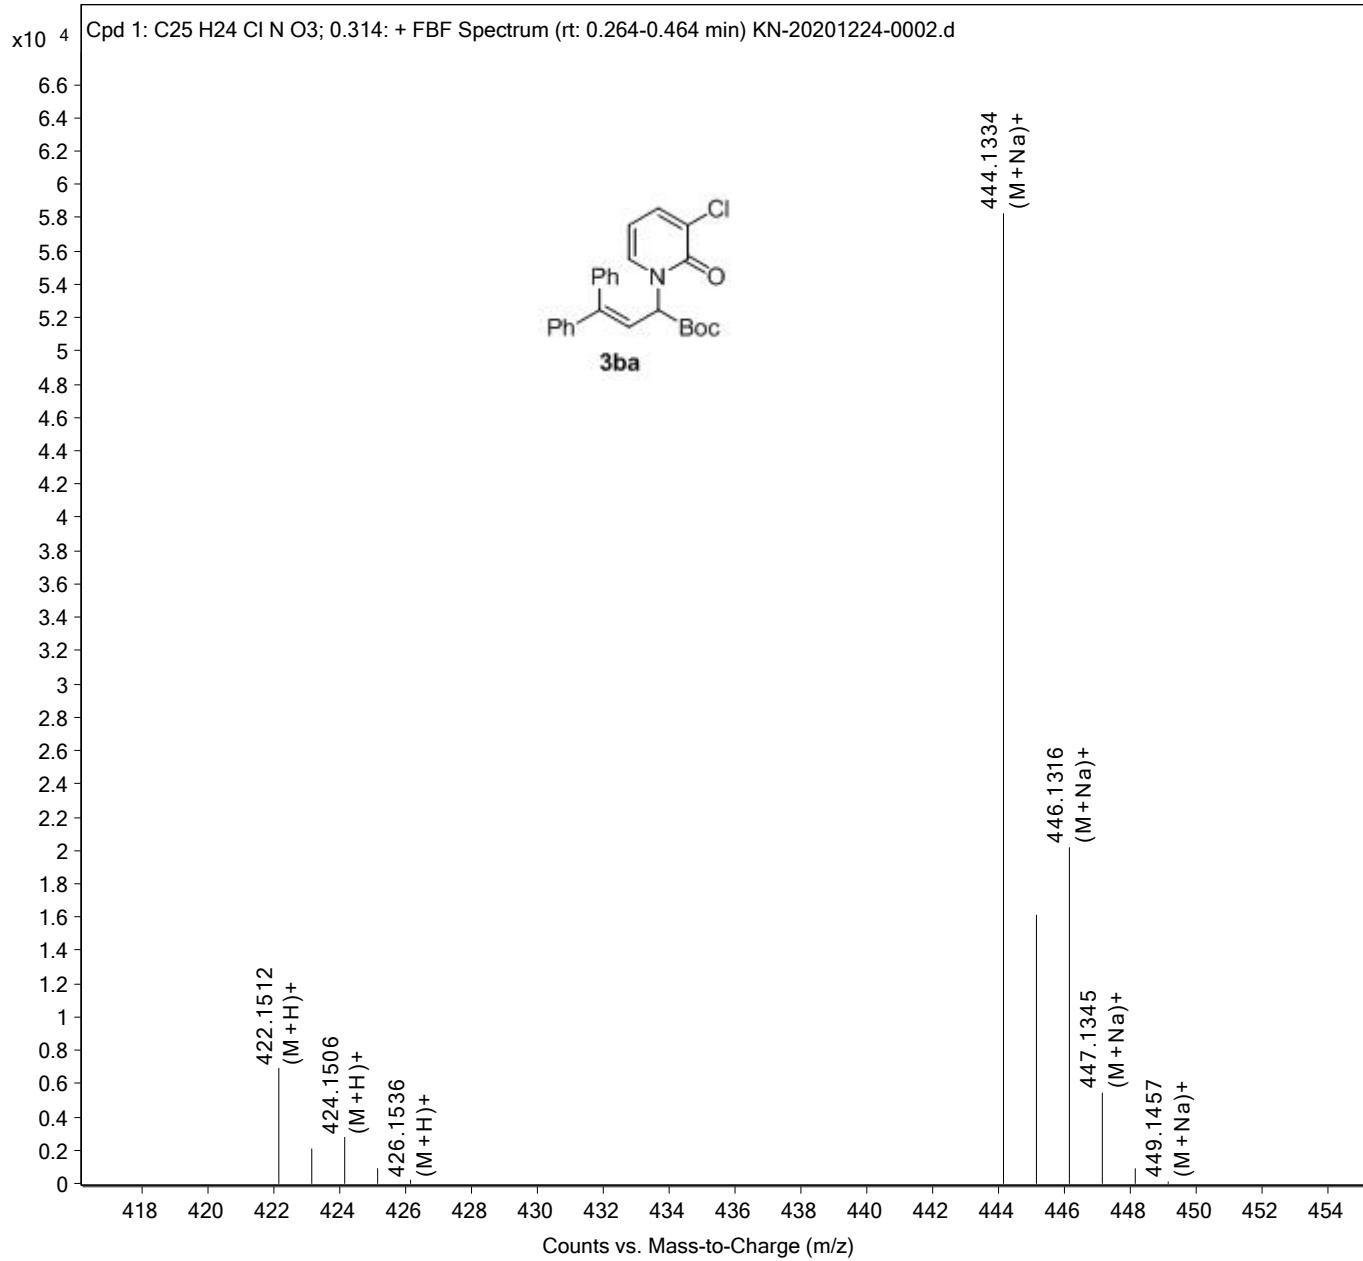

|                    |             |                               |         |                        |                                   |
|--------------------|-------------|-------------------------------|---------|------------------------|-----------------------------------|
| <b>Sample Name</b> | Sample49    | <b>Position</b>               | P1-E5   | <b>Instrument Name</b> | Instrument 1                      |
| <b>User Name</b>   |             | <b>Inj Vol</b>                | 1       | <b>InjPosition</b>     |                                   |
| <b>Sample Type</b> | Sample      | <b>IRM Calibration Status</b> | Success | <b>Data Filename</b>   | KN-20201224-0005.d                |
| <b>ACQ Method</b>  | NOZHUNOUV.m | <b>Comment</b>                |         | <b>Acquired Time</b>   | 12/24/2020 1:22:49 PM (UTC+08:00) |

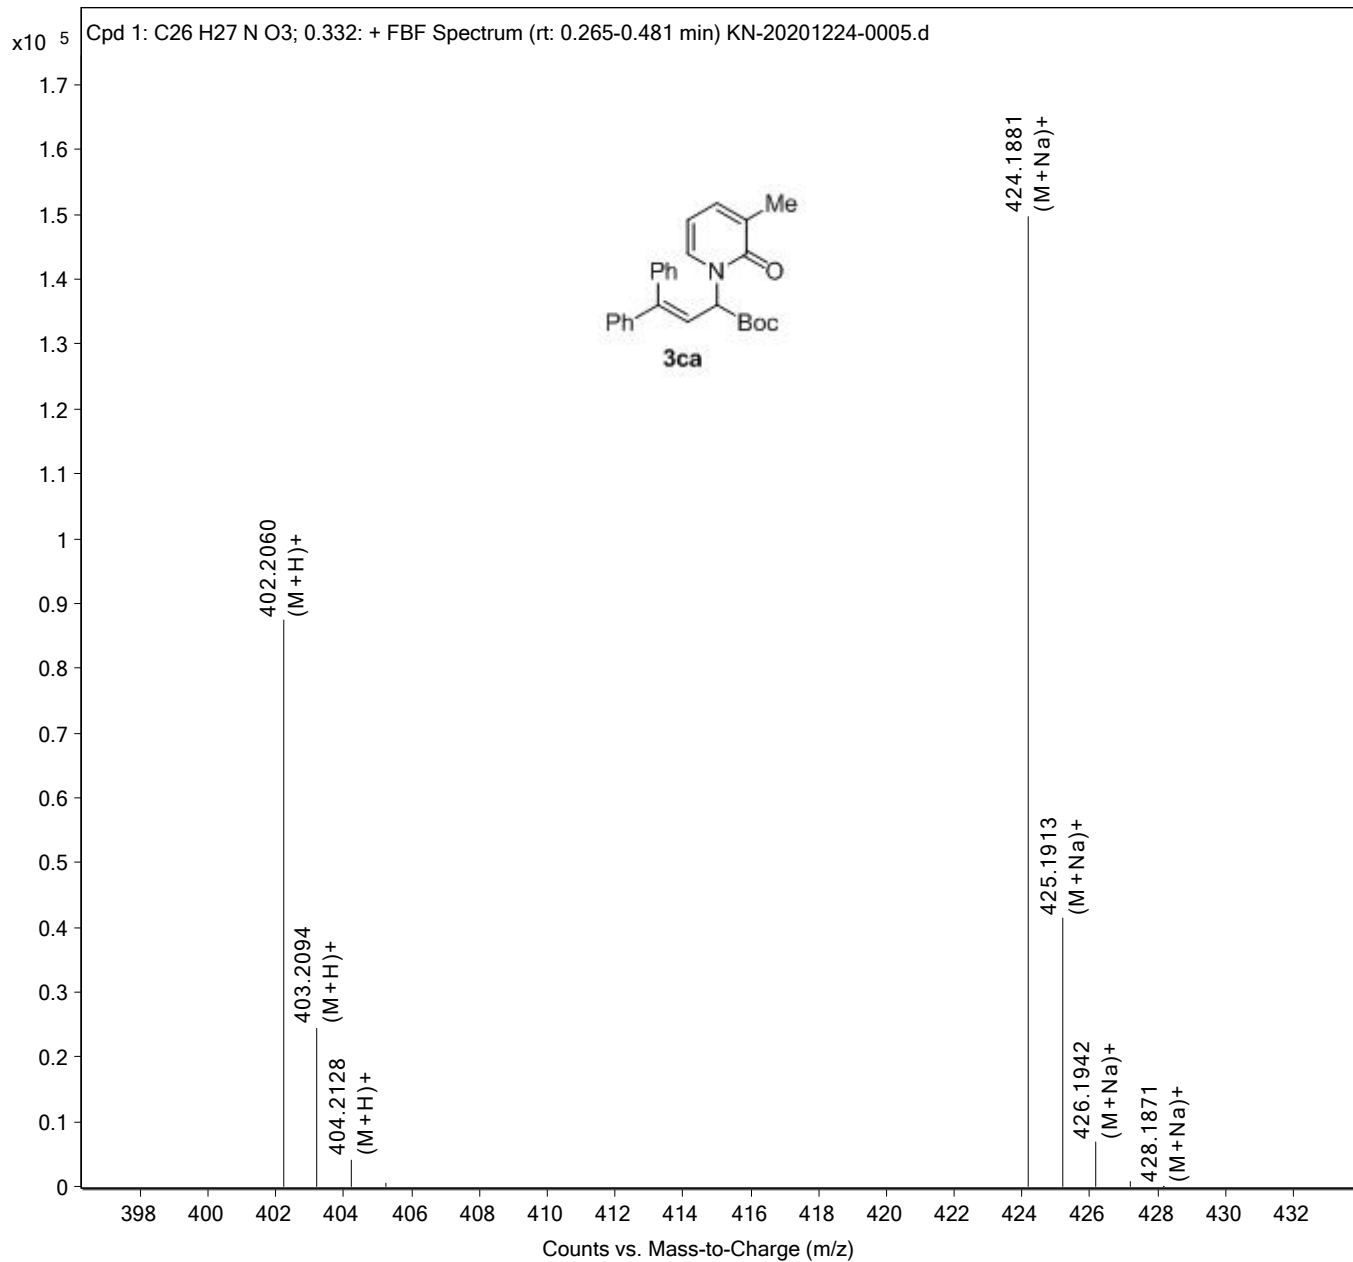



|                    |             |                               |         |                        |                                   |
|--------------------|-------------|-------------------------------|---------|------------------------|-----------------------------------|
| <b>Sample Name</b> | Sample47    | <b>Position</b>               | P1-E3   | <b>Instrument Name</b> | Instrument 1                      |
| <b>User Name</b>   |             | <b>Inj Vol</b>                | 1       | <b>InjPosition</b>     |                                   |
| <b>Sample Type</b> | Sample      | <b>IRM Calibration Status</b> | Success | <b>Data Filename</b>   | KN-20201224-0003.d                |
| <b>ACQ Method</b>  | NOZHUNOUV.m | <b>Comment</b>                |         | <b>Acquired Time</b>   | 12/24/2020 1:19:27 PM (UTC+08:00) |

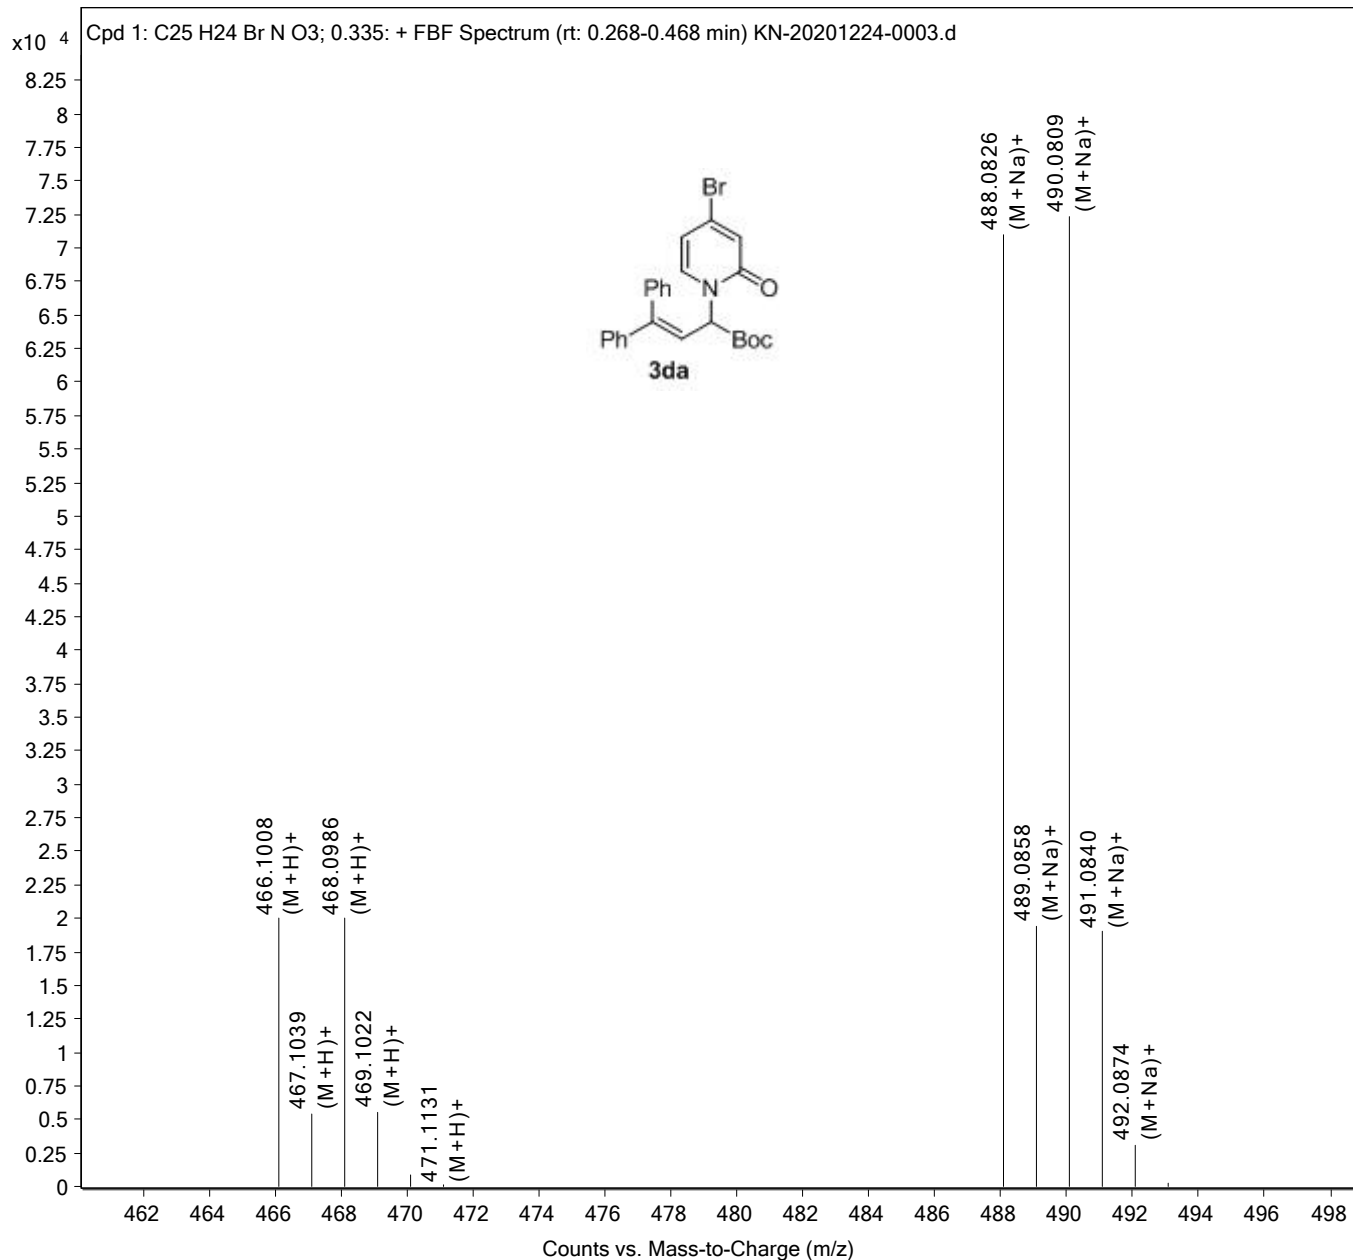



|                    |             |                               |         |                        |                                   |
|--------------------|-------------|-------------------------------|---------|------------------------|-----------------------------------|
| <b>Sample Name</b> | Sample53    | <b>Position</b>               | P1-E9   | <b>Instrument Name</b> | Instrument 1                      |
| <b>User Name</b>   |             | <b>Inj Vol</b>                | 1       | <b>InjPosition</b>     |                                   |
| <b>Sample Type</b> | Sample      | <b>IRM Calibration Status</b> | Success | <b>Data Filename</b>   | KN-20201224-0009.d                |
| <b>ACQ Method</b>  | NOZHUNOUV.m | <b>Comment</b>                |         | <b>Acquired Time</b>   | 12/24/2020 1:29:37 PM (UTC+08:00) |

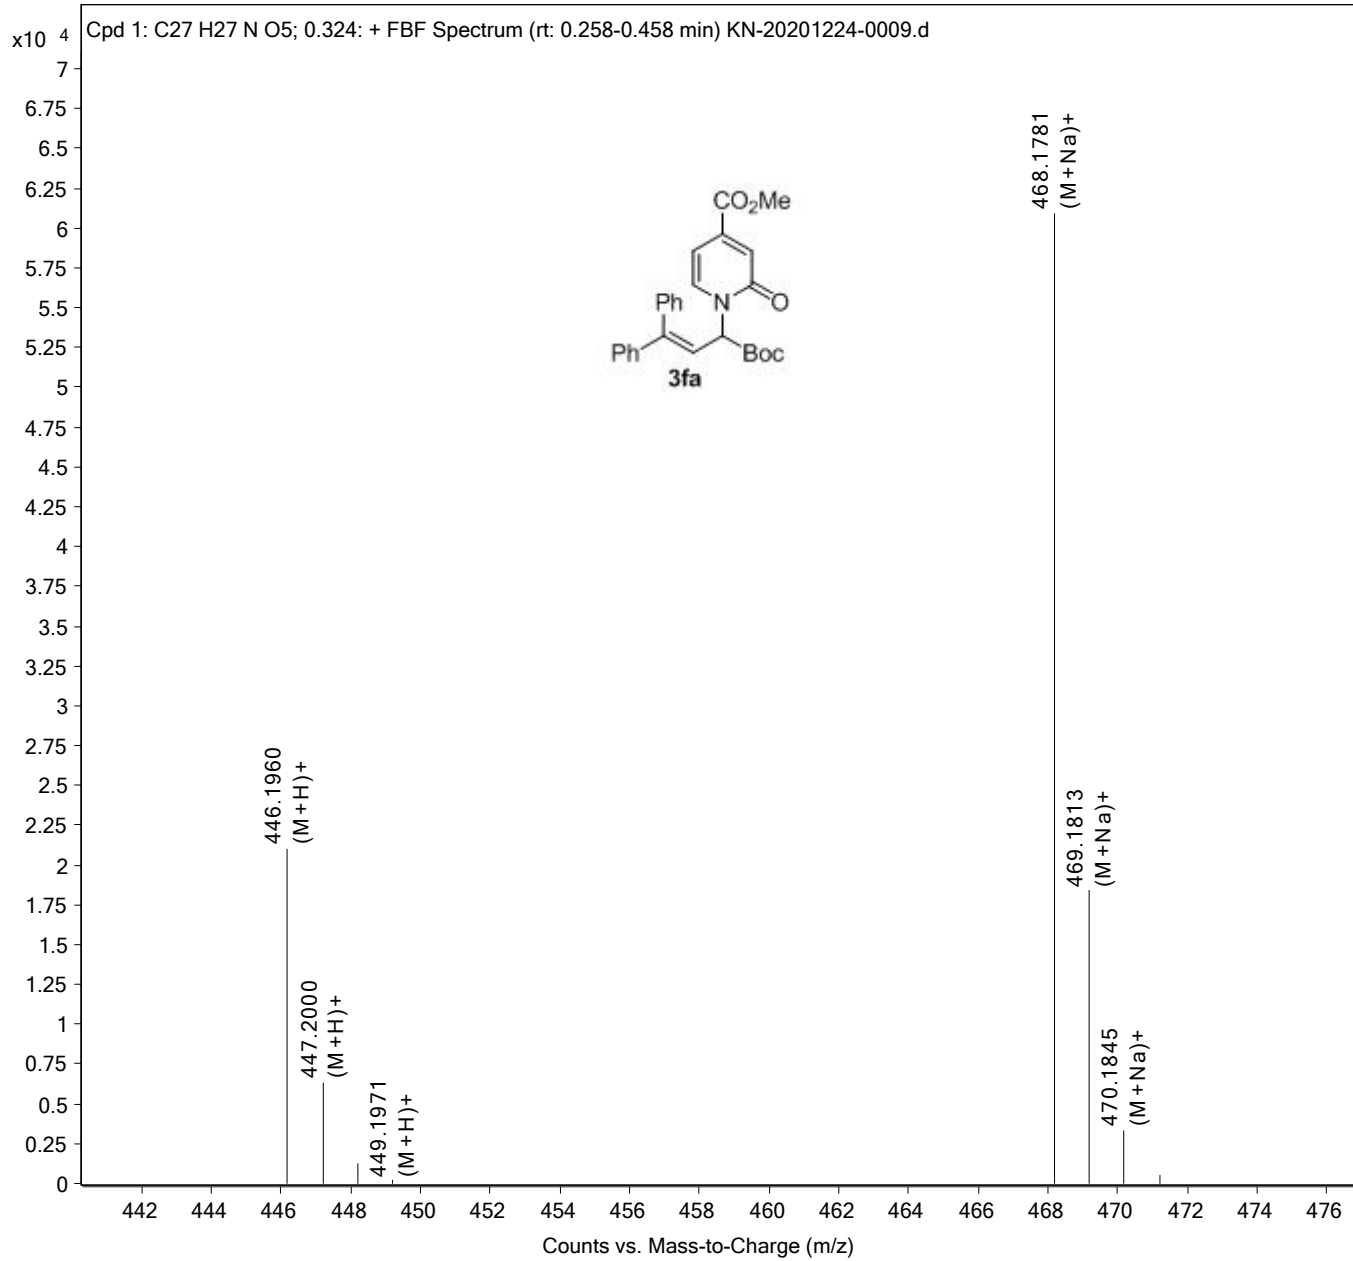

|                    |             |                               |         |                        |                                   |
|--------------------|-------------|-------------------------------|---------|------------------------|-----------------------------------|
| <b>Sample Name</b> | Sample51    | <b>Position</b>               | P1-E7   | <b>Instrument Name</b> | Instrument 1                      |
| <b>User Name</b>   |             | <b>Inj Vol</b>                | 1       | <b>InjPosition</b>     |                                   |
| <b>Sample Type</b> | Sample      | <b>IRM Calibration Status</b> | Success | <b>Data Filename</b>   | KN-20201224-0007.d                |
| <b>ACQ Method</b>  | NOZHUNOUV.m | <b>Comment</b>                |         | <b>Acquired Time</b>   | 12/24/2020 1:26:15 PM (UTC+08:00) |

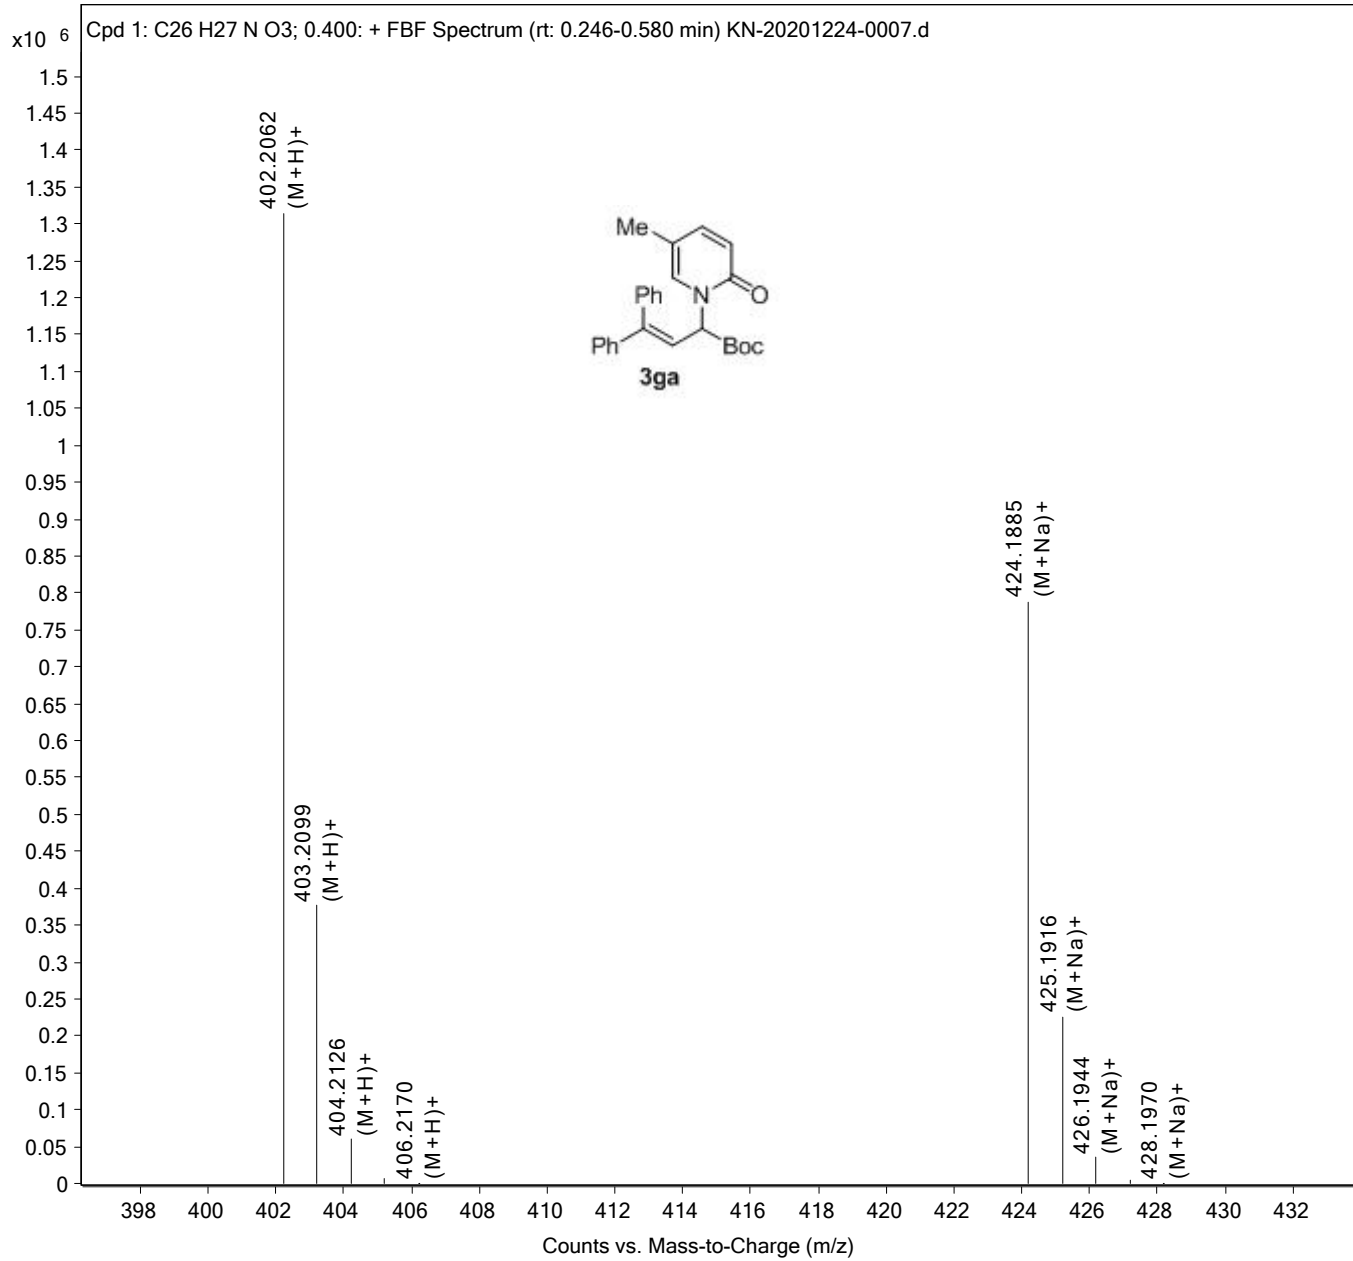

|                    |             |                               |         |                        |                                   |
|--------------------|-------------|-------------------------------|---------|------------------------|-----------------------------------|
| <b>Sample Name</b> | Sample48    | <b>Position</b>               | P1-E4   | <b>Instrument Name</b> | Instrument 1                      |
| <b>User Name</b>   |             | <b>Inj Vol</b>                | 1       | <b>InjPosition</b>     |                                   |
| <b>Sample Type</b> | Sample      | <b>IRM Calibration Status</b> | Success | <b>Data Filename</b>   | KN-20201224-0004.d                |
| <b>ACQ Method</b>  | NOZHUNOUV.m | <b>Comment</b>                |         | <b>Acquired Time</b>   | 12/24/2020 1:21:07 PM (UTC+08:00) |

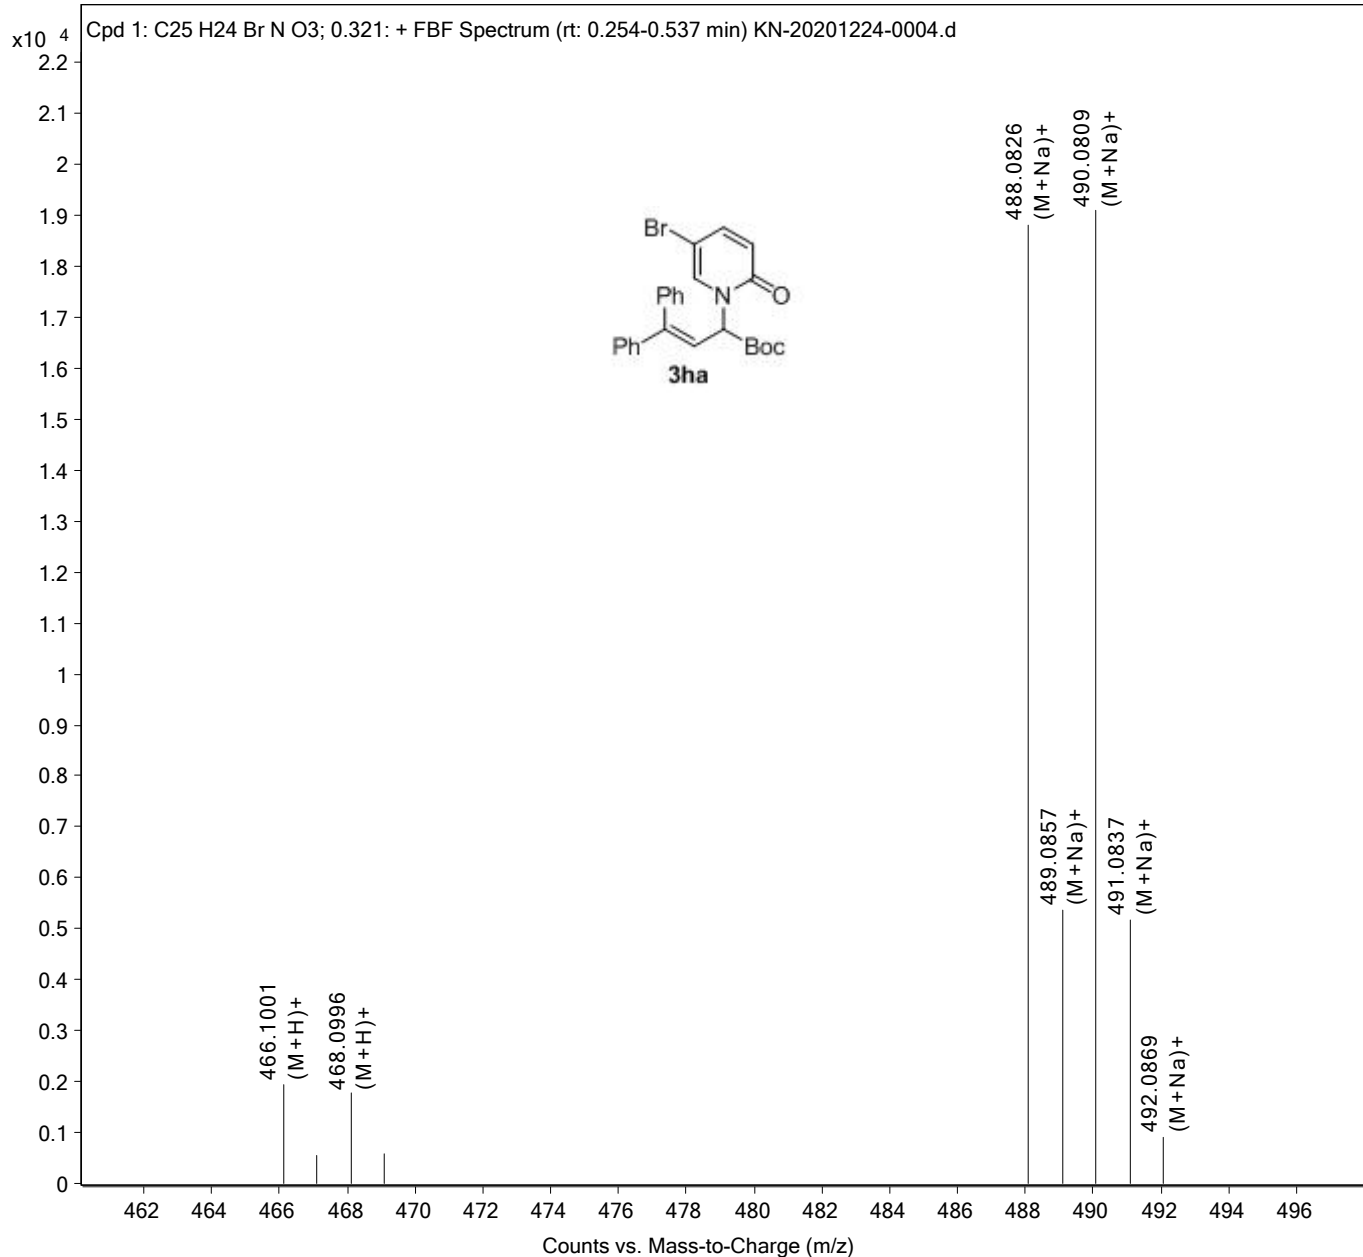



|                    |             |                               |         |                        |                                   |
|--------------------|-------------|-------------------------------|---------|------------------------|-----------------------------------|
| <b>Sample Name</b> | Sample57    | <b>Position</b>               | P1-F2   | <b>Instrument Name</b> | Instrument 1                      |
| <b>User Name</b>   |             | <b>Inj Vol</b>                | 1       | <b>InjPosition</b>     |                                   |
| <b>Sample Type</b> | Sample      | <b>IRM Calibration Status</b> | Success | <b>Data Filename</b>   | KN-20201224-0013.d                |
| <b>ACQ Method</b>  | NOZHUNOUV.m | <b>Comment</b>                |         | <b>Acquired Time</b>   | 12/24/2020 1:36:23 PM (UTC+08:00) |

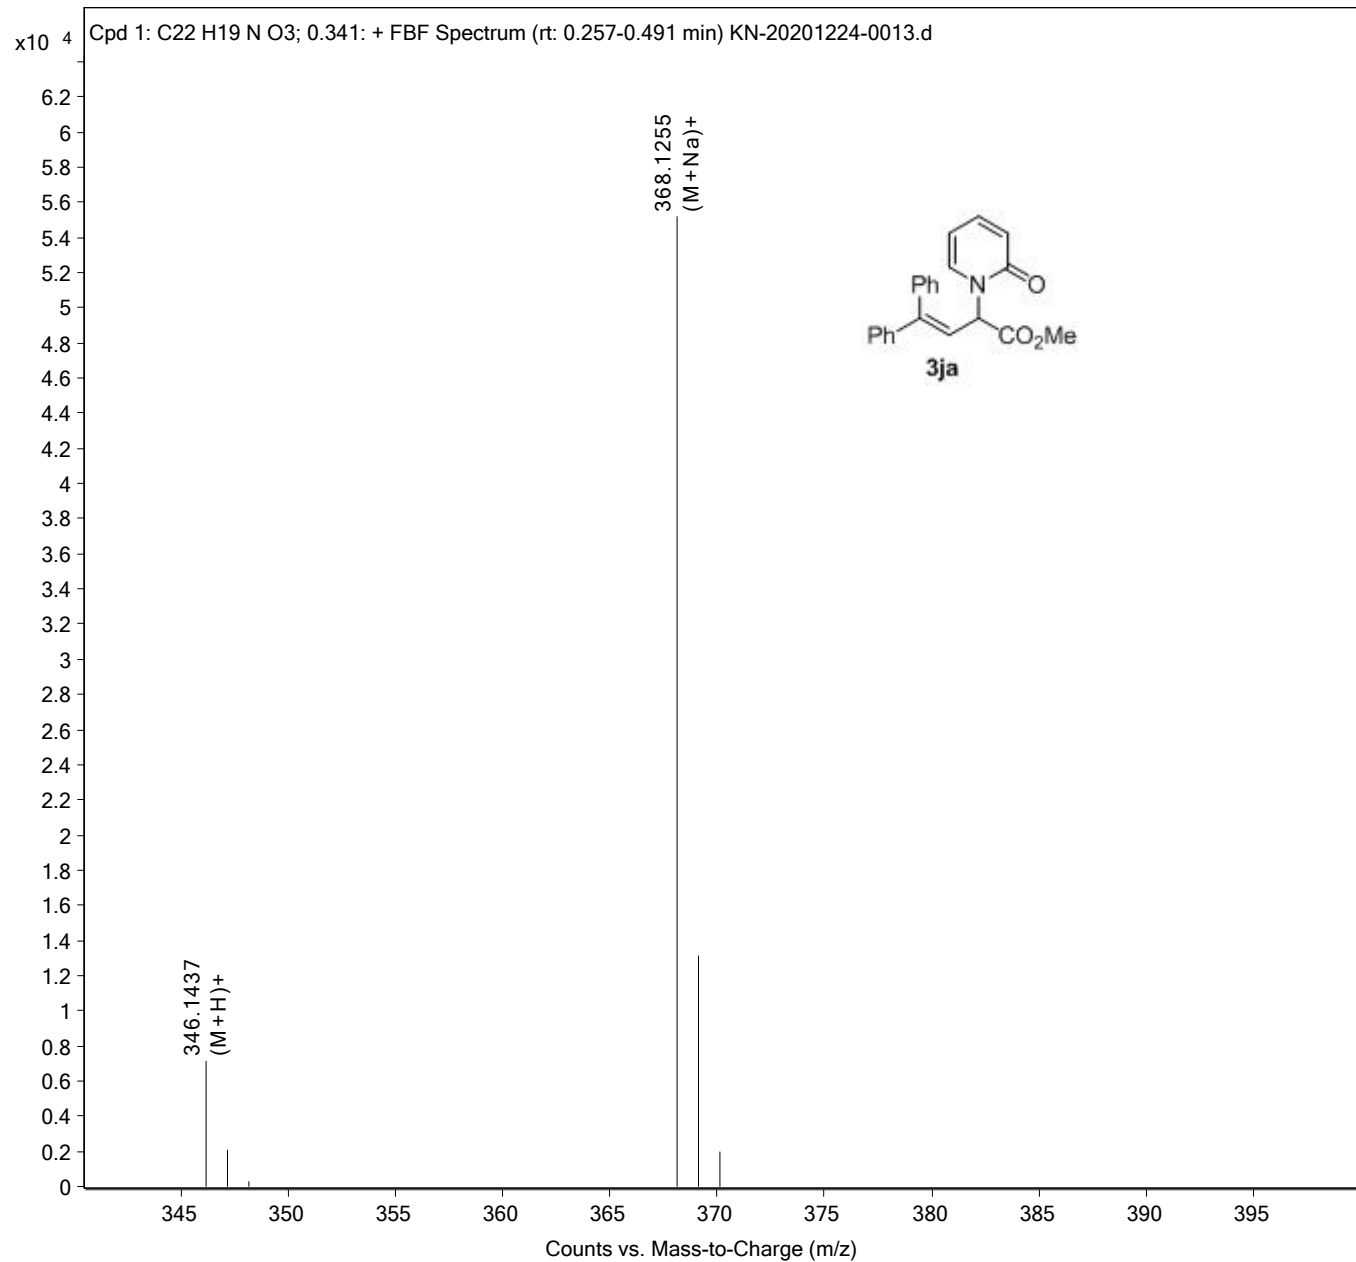

|                    |             |                               |         |                        |                                   |
|--------------------|-------------|-------------------------------|---------|------------------------|-----------------------------------|
| <b>Sample Name</b> | Sample56    | <b>Position</b>               | P1-F1   | <b>Instrument Name</b> | Instrument 1                      |
| <b>User Name</b>   |             | <b>Inj Vol</b>                | 1       | <b>InjPosition</b>     |                                   |
| <b>Sample Type</b> | Sample      | <b>IRM Calibration Status</b> | Success | <b>Data Filename</b>   | KN-20201224-0012.d                |
| <b>ACQ Method</b>  | NOZHUNOUV.m | <b>Comment</b>                |         | <b>Acquired Time</b>   | 12/24/2020 1:34:41 PM (UTC+08:00) |

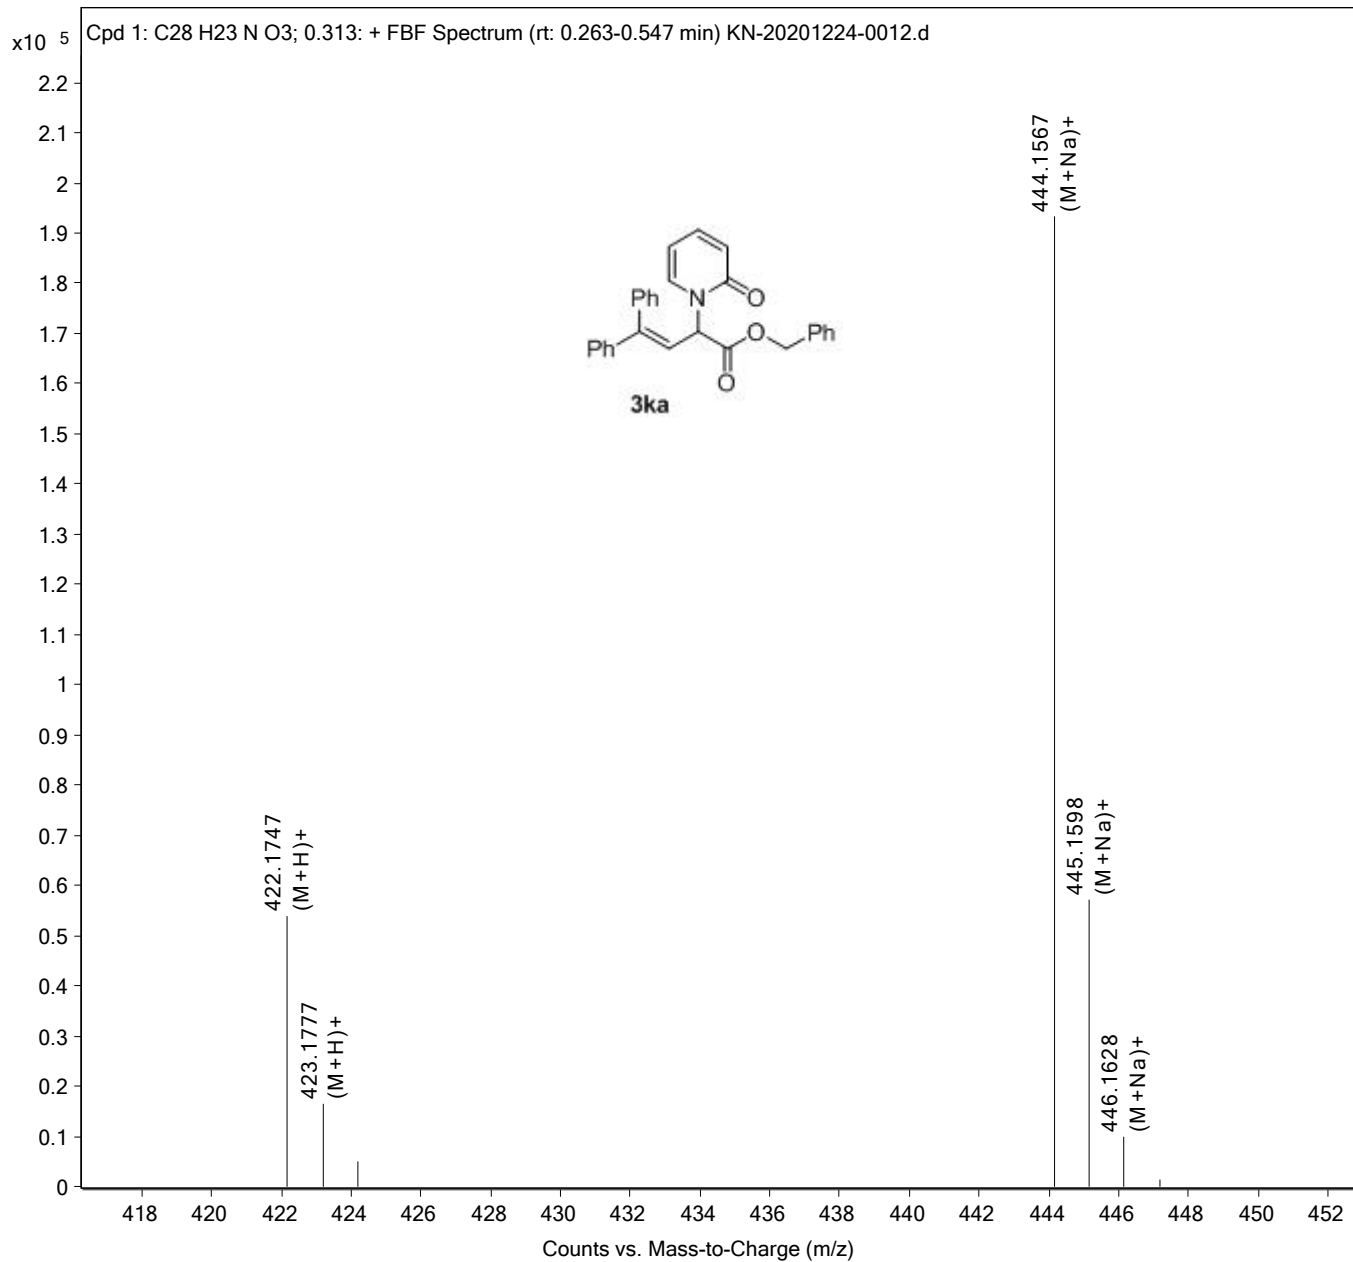



|                    |             |                               |         |                        |                                   |
|--------------------|-------------|-------------------------------|---------|------------------------|-----------------------------------|
| <b>Sample Name</b> | Sample54    | <b>Position</b>               | P1-E10  | <b>Instrument Name</b> | Instrument 1                      |
| <b>User Name</b>   |             | <b>Inj Vol</b>                | 1       | <b>InjPosition</b>     |                                   |
| <b>Sample Type</b> | Sample      | <b>IRM Calibration Status</b> | Success | <b>Data Filename</b>   | KN-20201224-0010.d                |
| <b>ACQ Method</b>  | NOZHUNOUV.m | <b>Comment</b>                |         | <b>Acquired Time</b>   | 12/24/2020 1:31:19 PM (UTC+08:00) |

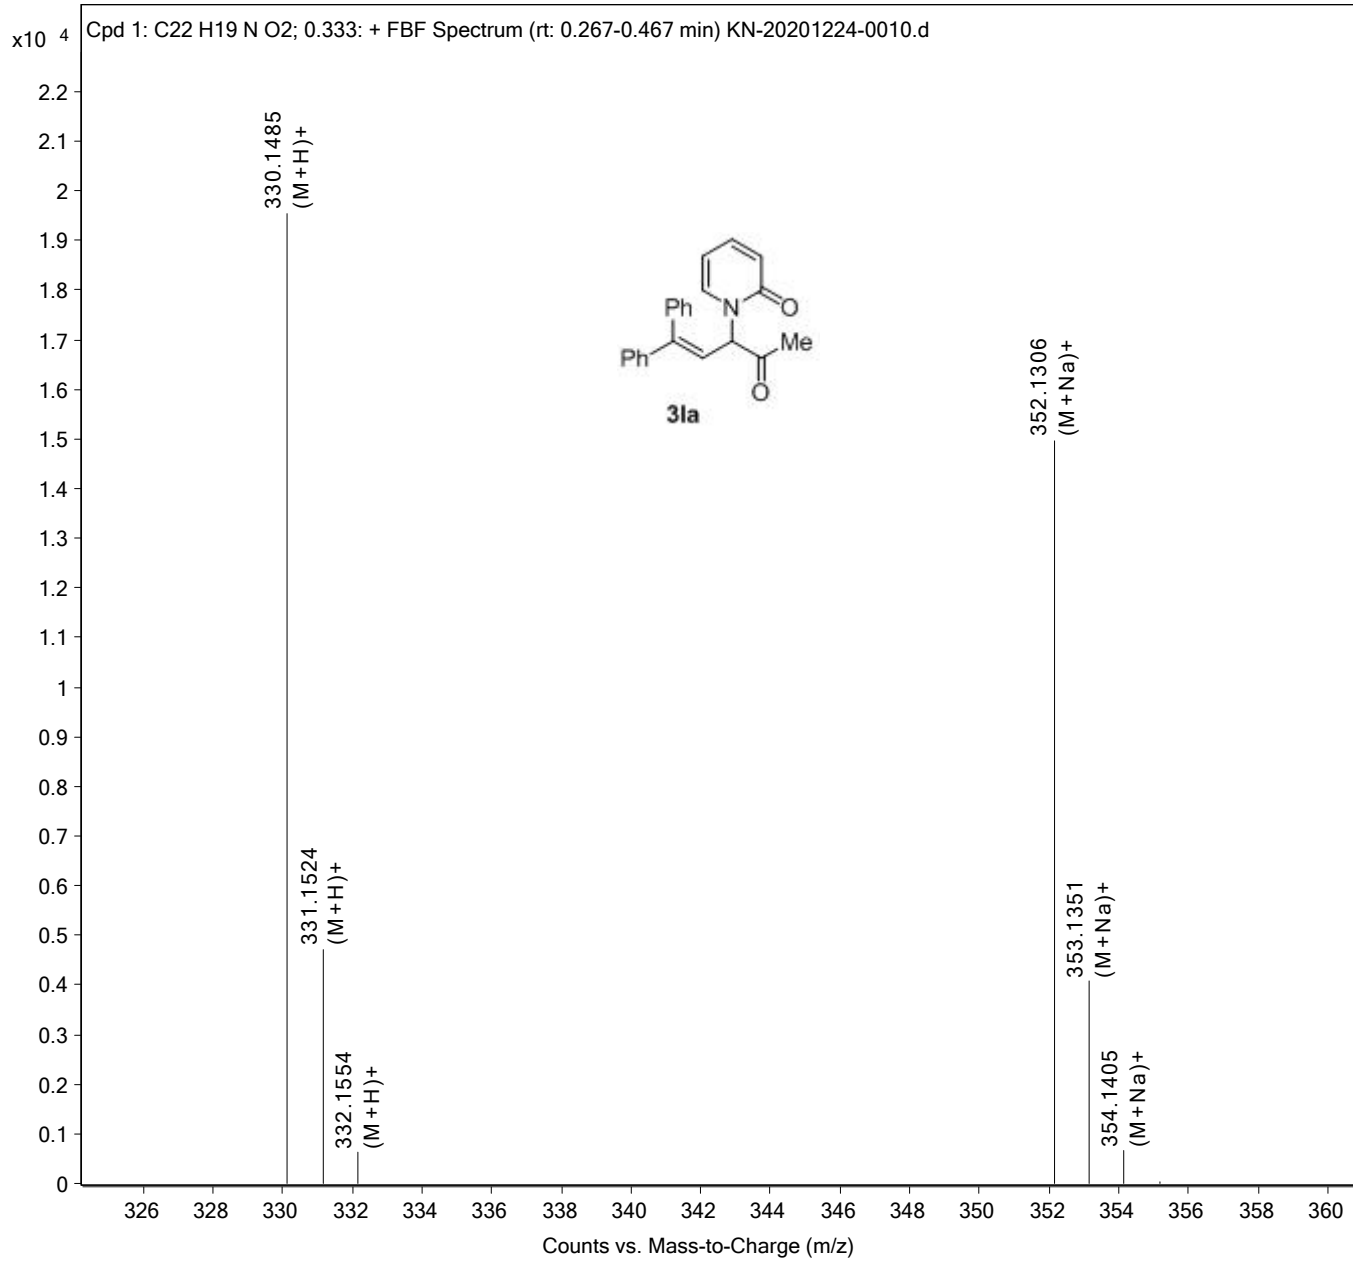

|                    |             |                               |         |                        |                                   |
|--------------------|-------------|-------------------------------|---------|------------------------|-----------------------------------|
| <b>Sample Name</b> | Sample58    | <b>Position</b>               | P1-F3   | <b>Instrument Name</b> | Instrument 1                      |
| <b>User Name</b>   |             | <b>Inj Vol</b>                | 1       | <b>InjPosition</b>     |                                   |
| <b>Sample Type</b> | Sample      | <b>IRM Calibration Status</b> | Success | <b>Data Filename</b>   | KN-20201224-0014.d                |
| <b>ACQ Method</b>  | NOZHUNOUV.m | <b>Comment</b>                |         | <b>Acquired Time</b>   | 12/24/2020 1:38:05 PM (UTC+08:00) |

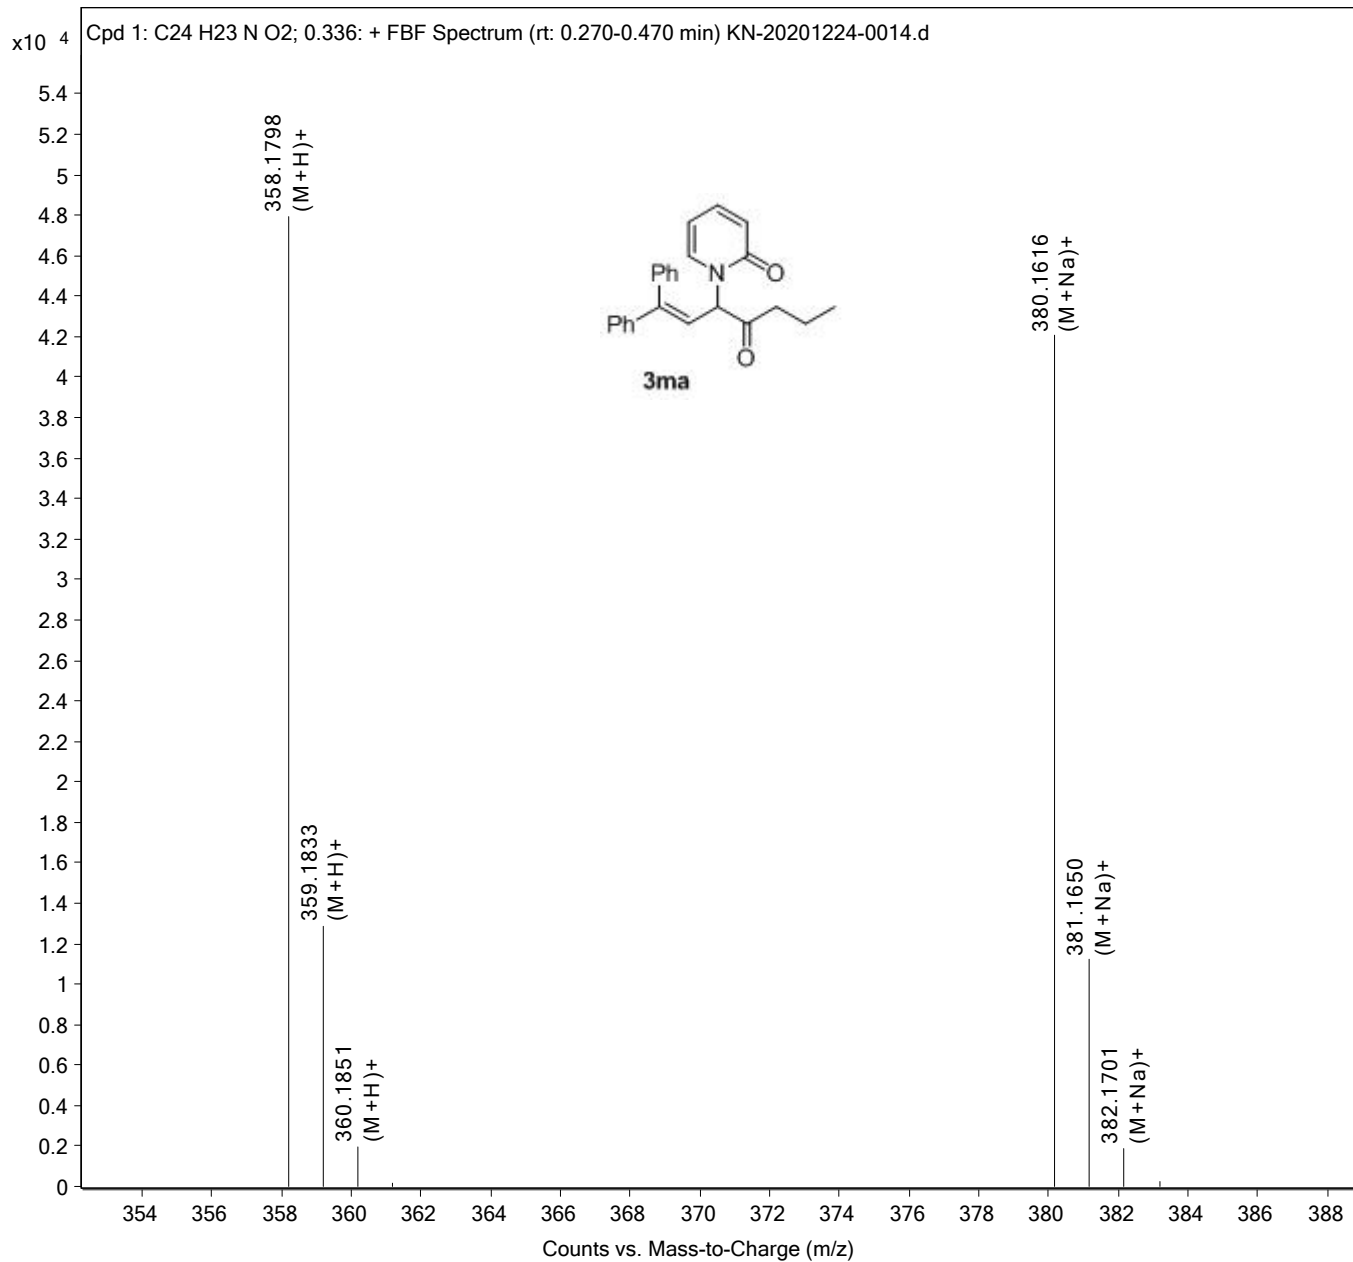

|                    |             |                               |         |                        |                                   |
|--------------------|-------------|-------------------------------|---------|------------------------|-----------------------------------|
| <b>Sample Name</b> | Sample55    | <b>Position</b>               | P1-E11  | <b>Instrument Name</b> | Instrument 1                      |
| <b>User Name</b>   |             | <b>Inj Vol</b>                | 1       | <b>InjPosition</b>     |                                   |
| <b>Sample Type</b> | Sample      | <b>IRM Calibration Status</b> | Success | <b>Data Filename</b>   | KN-20201224-0011.d                |
| <b>ACQ Method</b>  | NOZHUNOUV.m | <b>Comment</b>                |         | <b>Acquired Time</b>   | 12/24/2020 1:32:59 PM (UTC+08:00) |

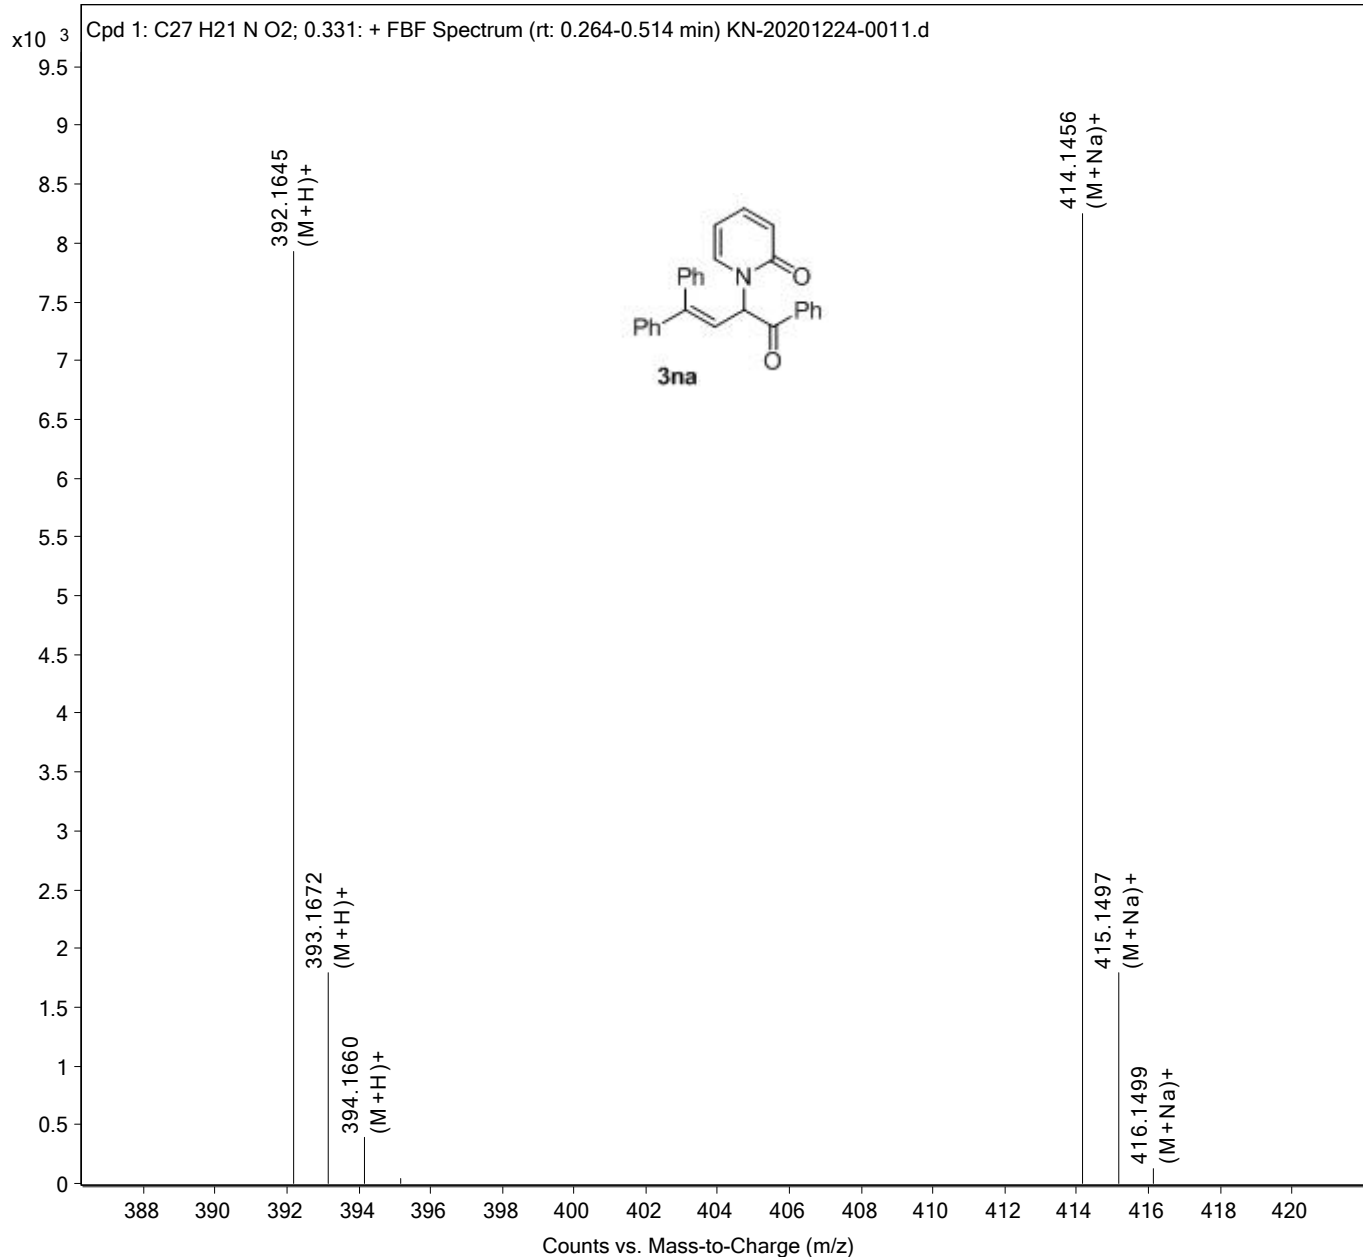

|                    |             |                               |         |                        |                                   |
|--------------------|-------------|-------------------------------|---------|------------------------|-----------------------------------|
| <b>Sample Name</b> | Sample60    | <b>Position</b>               | P1-F5   | <b>Instrument Name</b> | Instrument 1                      |
| <b>User Name</b>   |             | <b>Inj Vol</b>                | 1       | <b>InjPosition</b>     |                                   |
| <b>Sample Type</b> | Sample      | <b>IRM Calibration Status</b> | Success | <b>Data Filename</b>   | KN-20201224-0016.d                |
| <b>ACQ Method</b>  | NOZHUNOUV.m | <b>Comment</b>                |         | <b>Acquired Time</b>   | 12/24/2020 1:41:30 PM (UTC+08:00) |

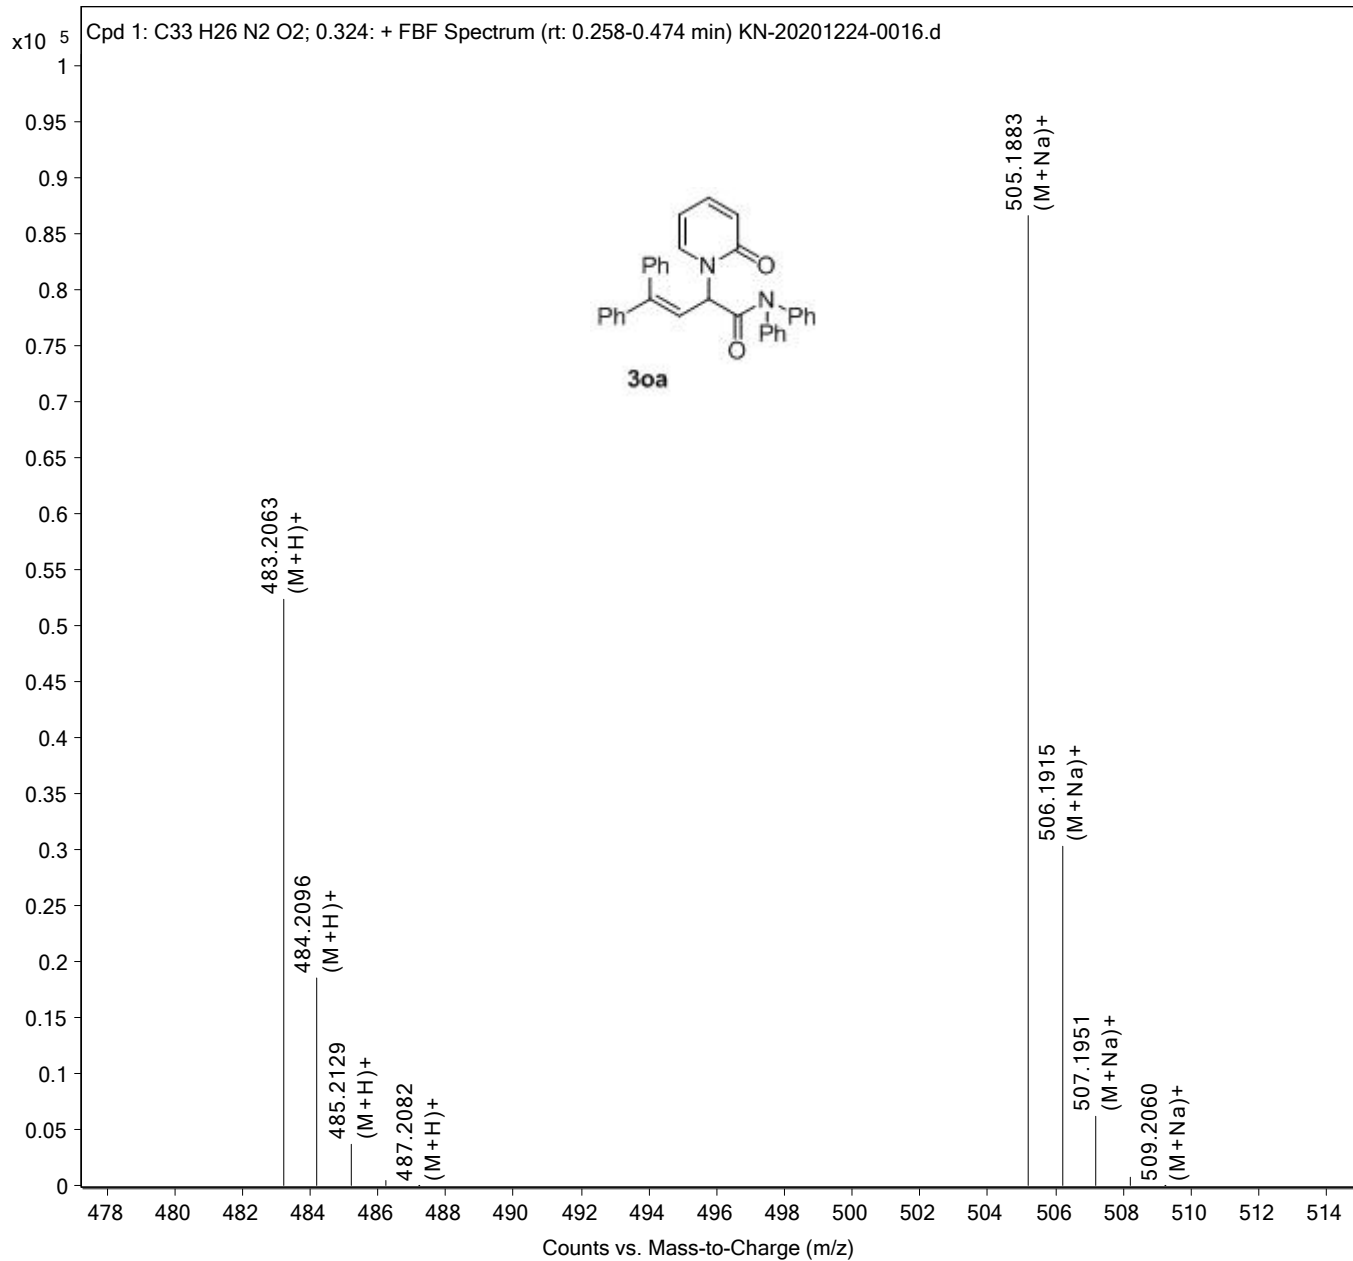

|                    |             |                               |         |                        |                                   |
|--------------------|-------------|-------------------------------|---------|------------------------|-----------------------------------|
| <b>Sample Name</b> | Sample59    | <b>Position</b>               | P1-F4   | <b>Instrument Name</b> | Instrument 1                      |
| <b>User Name</b>   |             | <b>Inj Vol</b>                | 1       | <b>InjPosition</b>     |                                   |
| <b>Sample Type</b> | Sample      | <b>IRM Calibration Status</b> | Success | <b>Data Filename</b>   | KN-20201224-0015.d                |
| <b>ACQ Method</b>  | NOZHUNOUV.m | <b>Comment</b>                |         | <b>Acquired Time</b>   | 12/24/2020 1:39:48 PM (UTC+08:00) |

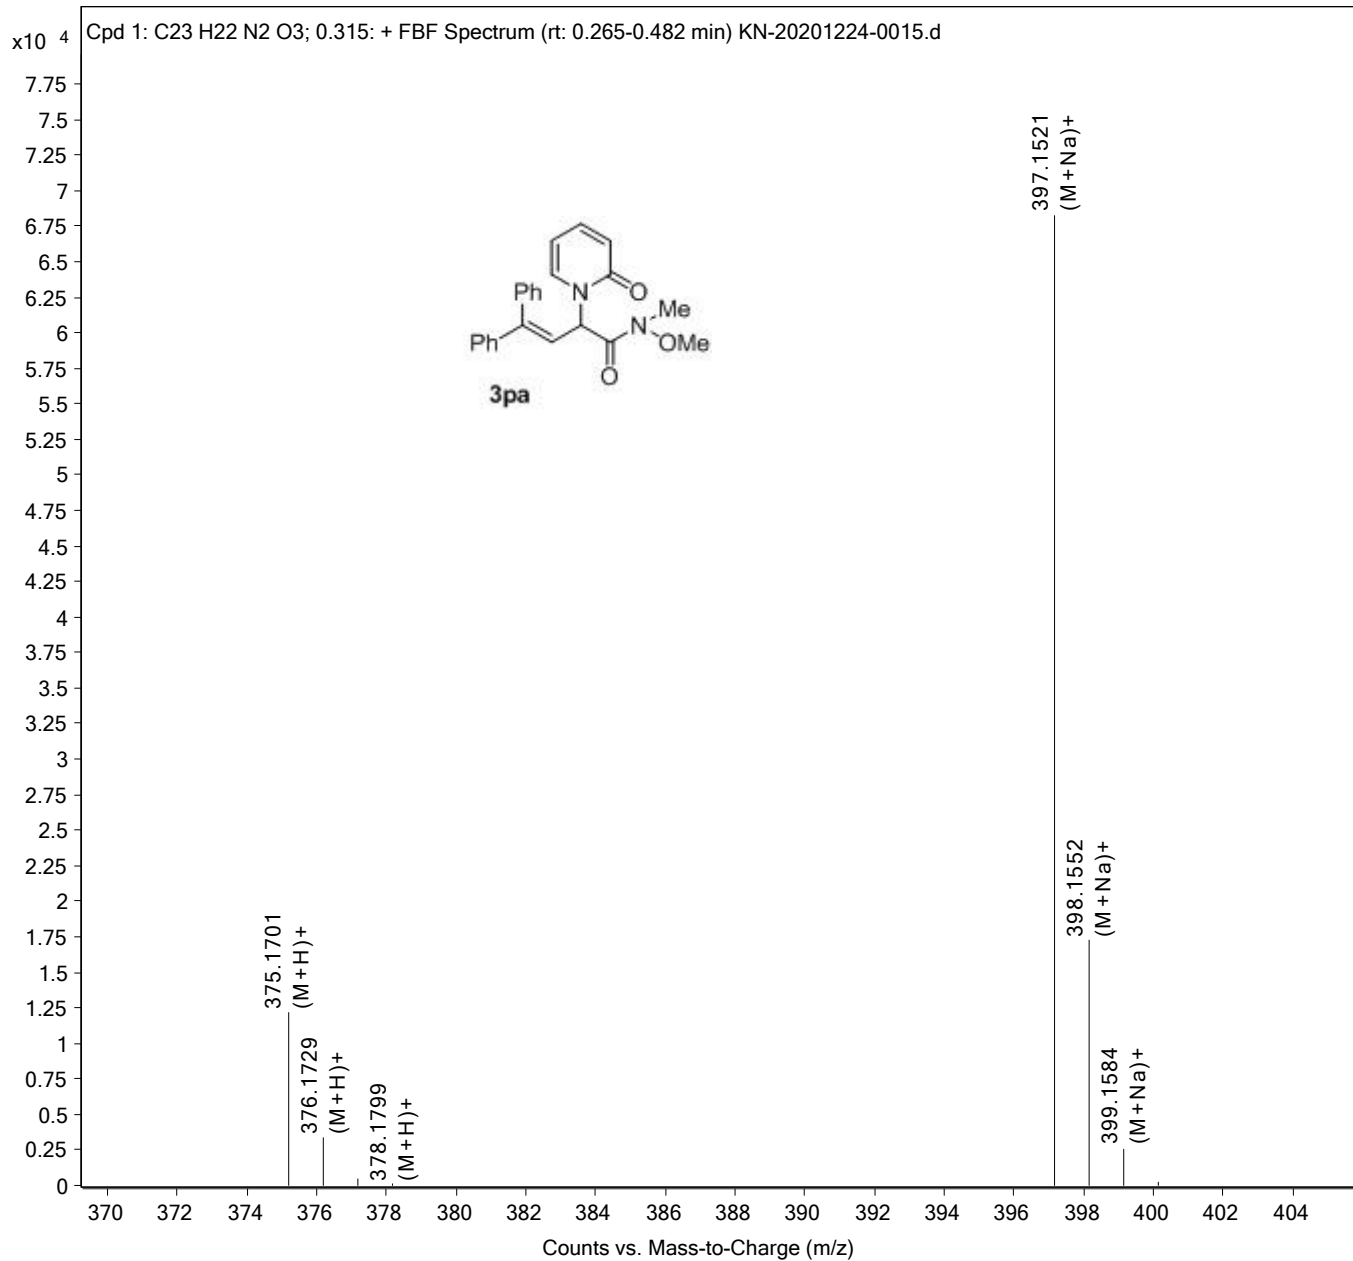

|                    |          |                               |         |                        |                                   |
|--------------------|----------|-------------------------------|---------|------------------------|-----------------------------------|
| <b>Sample Name</b> | Sample22 | <b>Position</b>               | P2-C1   | <b>Instrument Name</b> | Instrument 1                      |
| <b>User Name</b>   |          | <b>Inj Vol</b>                | 1       | <b>InjPosition</b>     |                                   |
| <b>Sample Type</b> | Sample   | <b>IRM Calibration Status</b> | Success | <b>Data Filename</b>   | CHL-20210524--0012.d              |
| <b>ACQ Method</b>  | NOZHU.m  | <b>Comment</b>                |         | <b>Acquired Time</b>   | 5/24/2021 11:49:36 AM (UTC+08:00) |

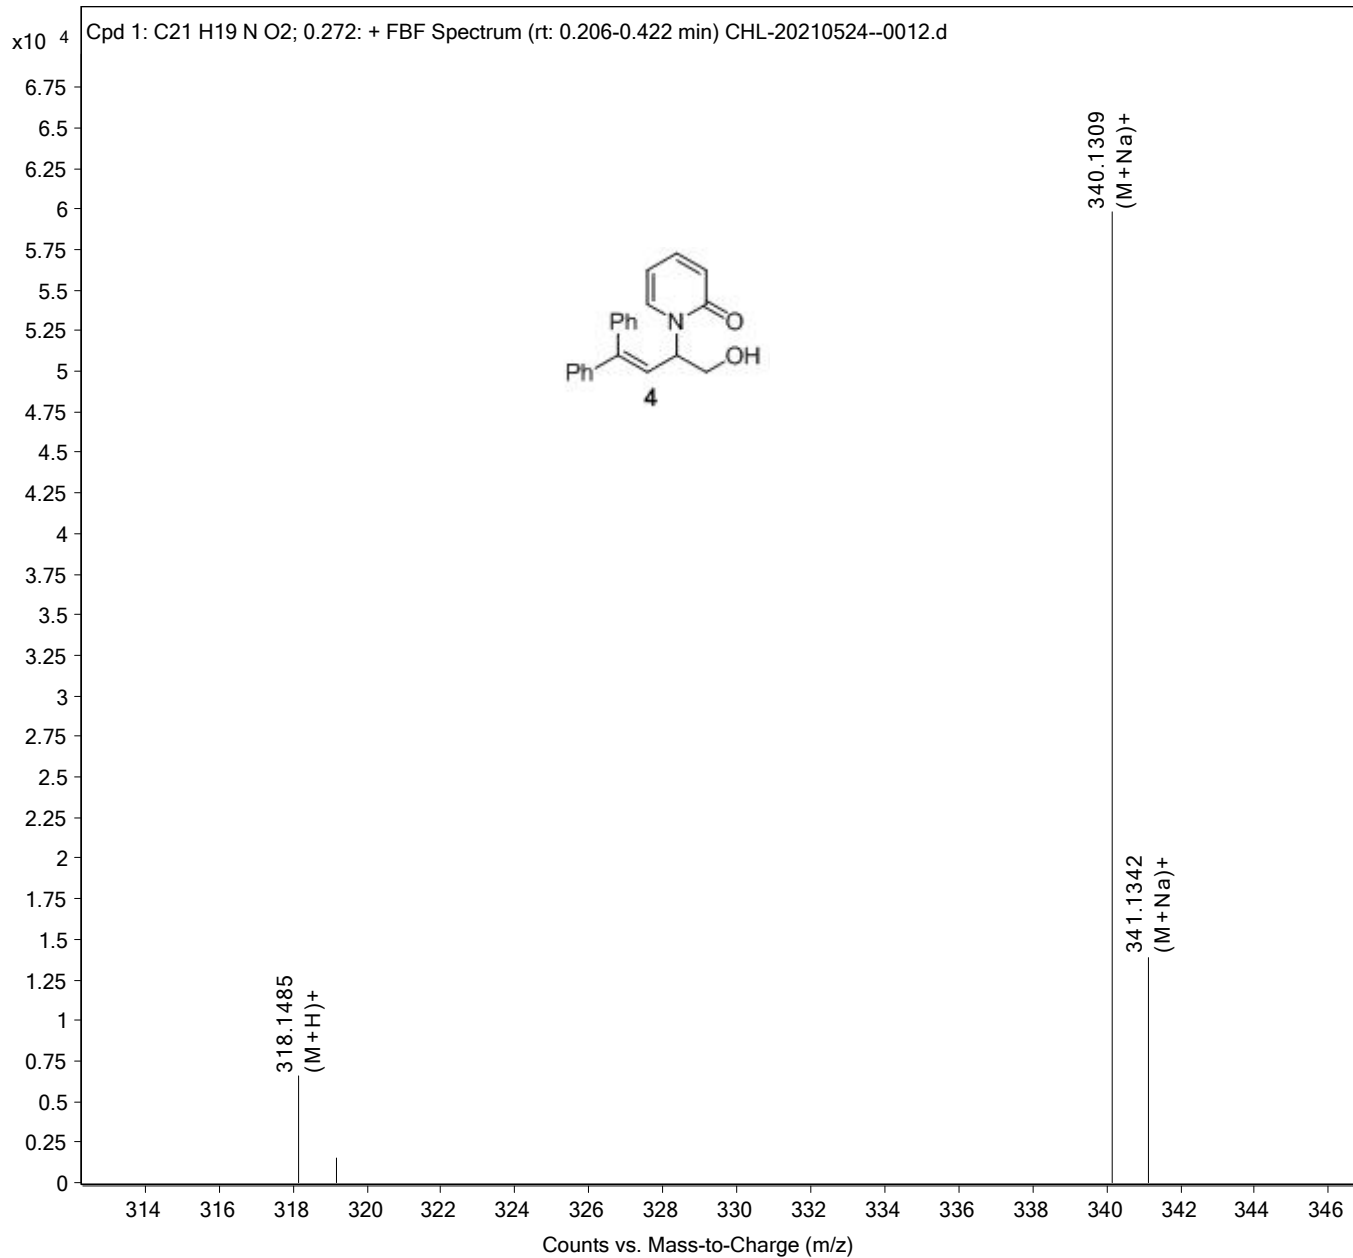

|                    |          |                               |         |                        |                                   |
|--------------------|----------|-------------------------------|---------|------------------------|-----------------------------------|
| <b>Sample Name</b> | Sample15 | <b>Position</b>               | P2-B5   | <b>Instrument Name</b> | Instrument 1                      |
| <b>User Name</b>   |          | <b>Inj Vol</b>                | 1       | <b>InjPosition</b>     |                                   |
| <b>Sample Type</b> | Sample   | <b>IRM Calibration Status</b> | Success | <b>Data Filename</b>   | CHL-20210524--0005.d              |
| <b>ACQ Method</b>  | NOZHU.m  | <b>Comment</b>                |         | <b>Acquired Time</b>   | 5/24/2021 11:38:18 AM (UTC+08:00) |

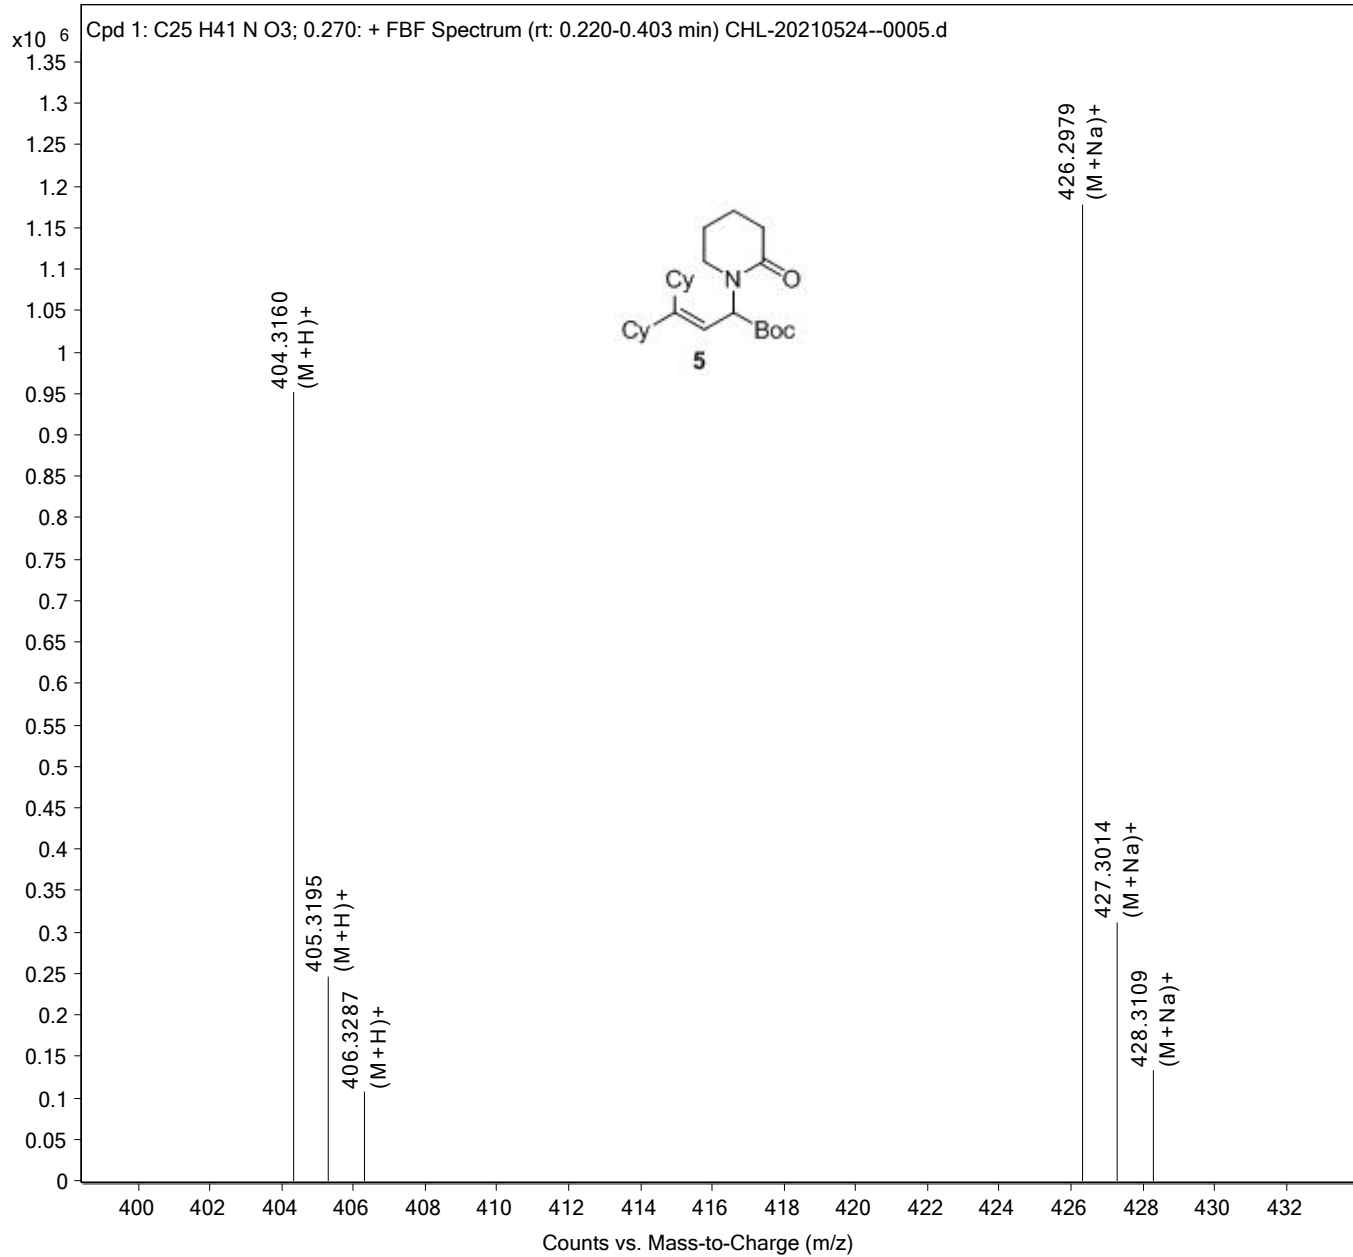

|                    |          |                               |         |                        |                                   |
|--------------------|----------|-------------------------------|---------|------------------------|-----------------------------------|
| <b>Sample Name</b> | Sample19 | <b>Position</b>               | P2-B9   | <b>Instrument Name</b> | Instrument 1                      |
| <b>User Name</b>   |          | <b>Inj Vol</b>                | 1       | <b>InjPosition</b>     |                                   |
| <b>Sample Type</b> | Sample   | <b>IRM Calibration Status</b> | Success | <b>Data Filename</b>   | CHL-20210524--0009.d              |
| <b>ACQ Method</b>  | NOZHU.m  | <b>Comment</b>                |         | <b>Acquired Time</b>   | 5/24/2021 11:44:45 AM (UTC+08:00) |

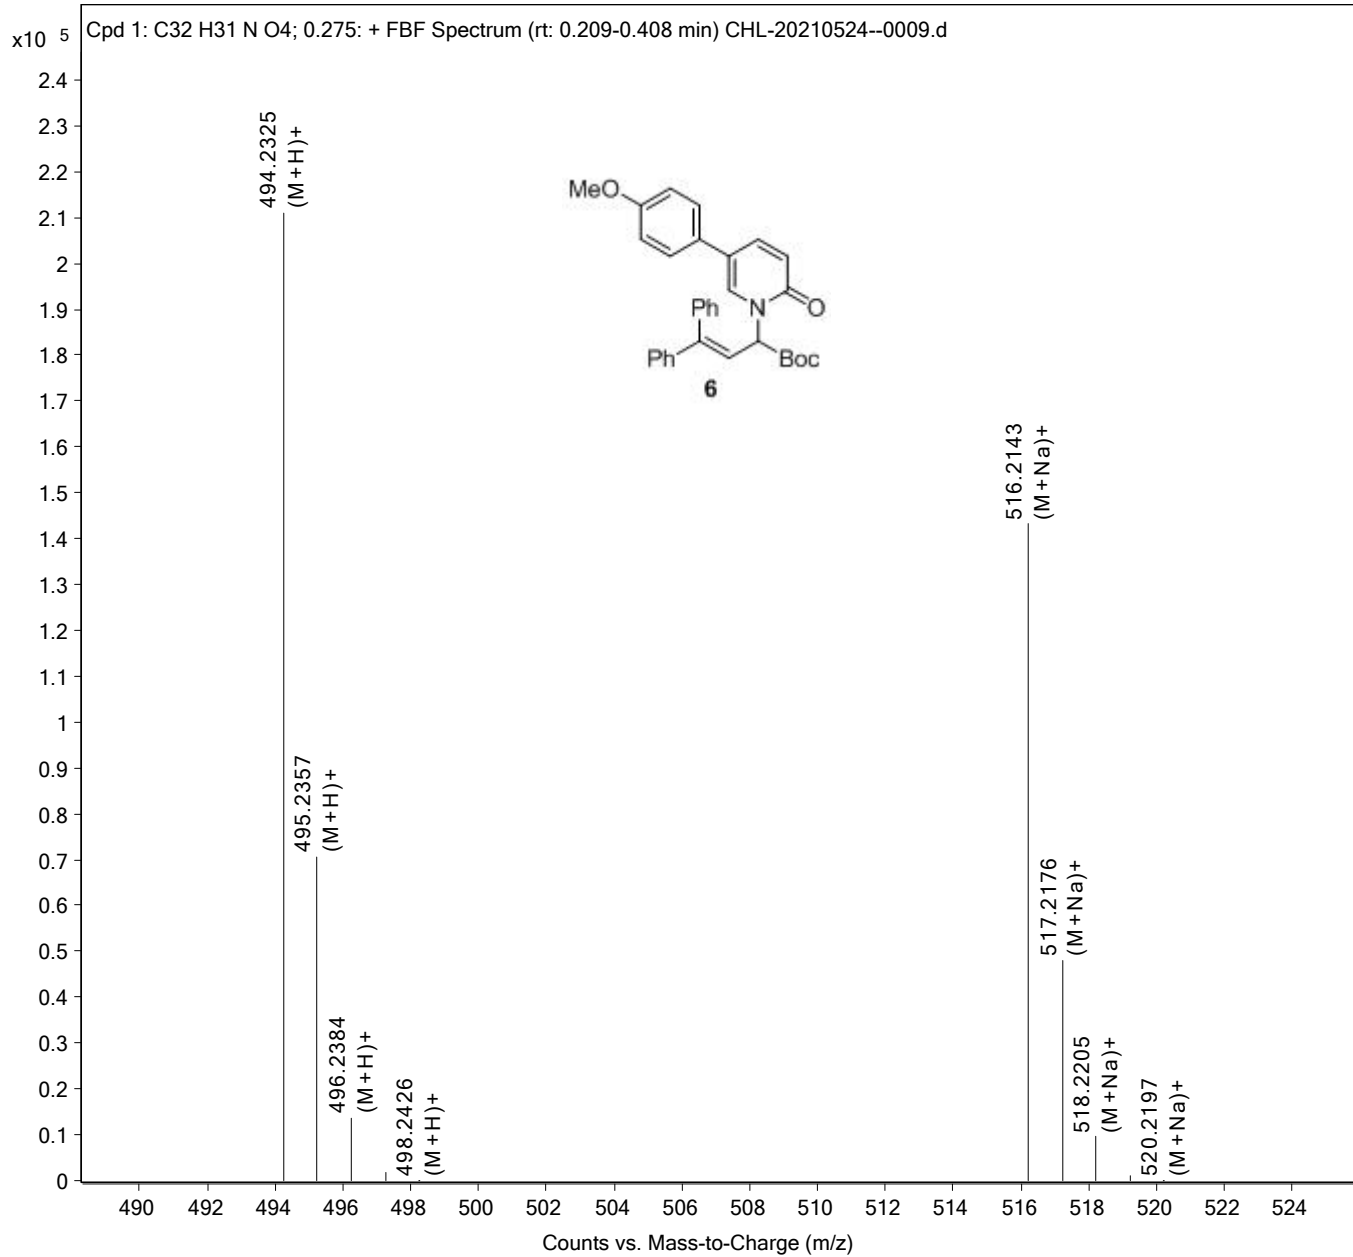

Supplement: d1qo01937f1.pdf [file d1qo01937f1.pdf]
